# Supplementary material
Source: PubMed Central journal article supplement (PMC8740609)

Electronic Annex EA 6-1: Location of SIMS analyses for QUE 97008 c51  
New constraints from  $^{26}\text{Al}$ - $^{26}\text{Mg}$  chronology of anorthite  
bearing chondrules in unequilibrated ordinary chondrites  
*Guillaume Siron, Kohei Fukuda, Makoto Kimura, and Noriko T. Kita*

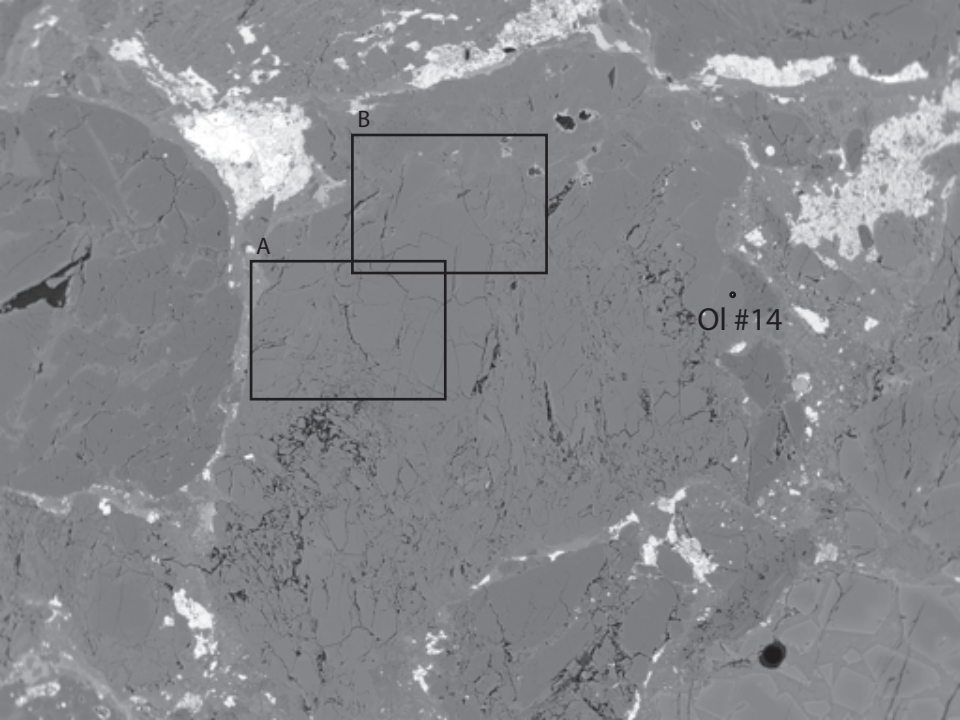

B

A

Ol #14

A

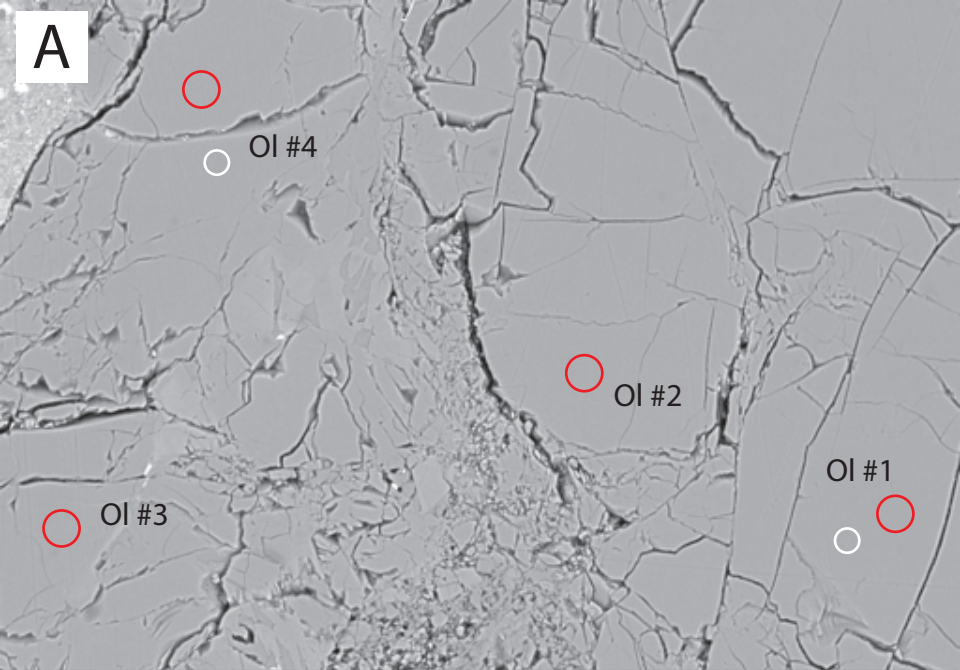

OI #4

OI #2

OI #3

OI #1

**B**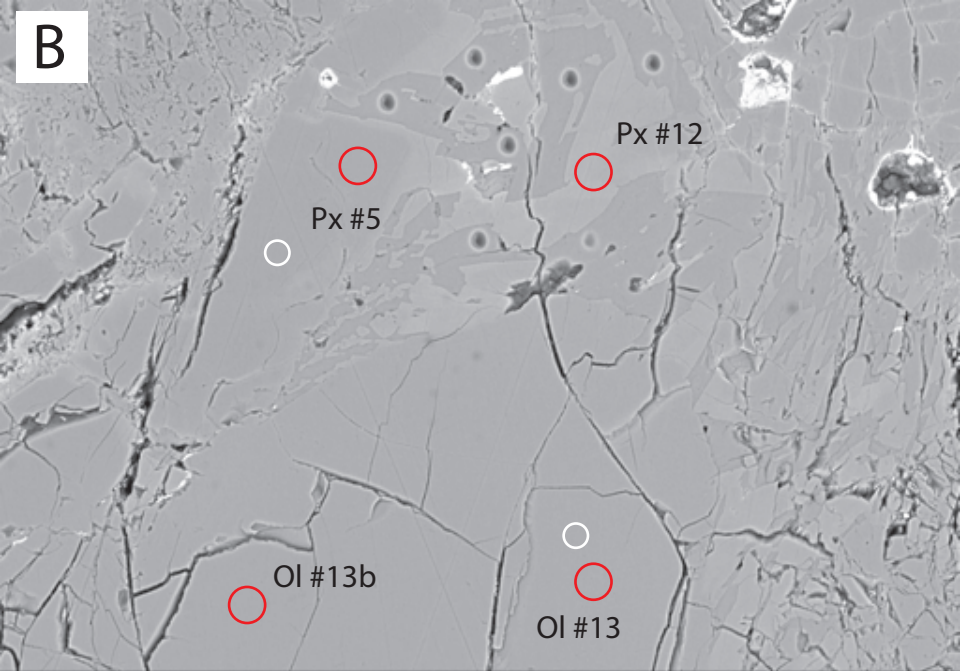

Px #12

Px #5

Ol #13b

Ol #13

Ol-Px oxygen spots:

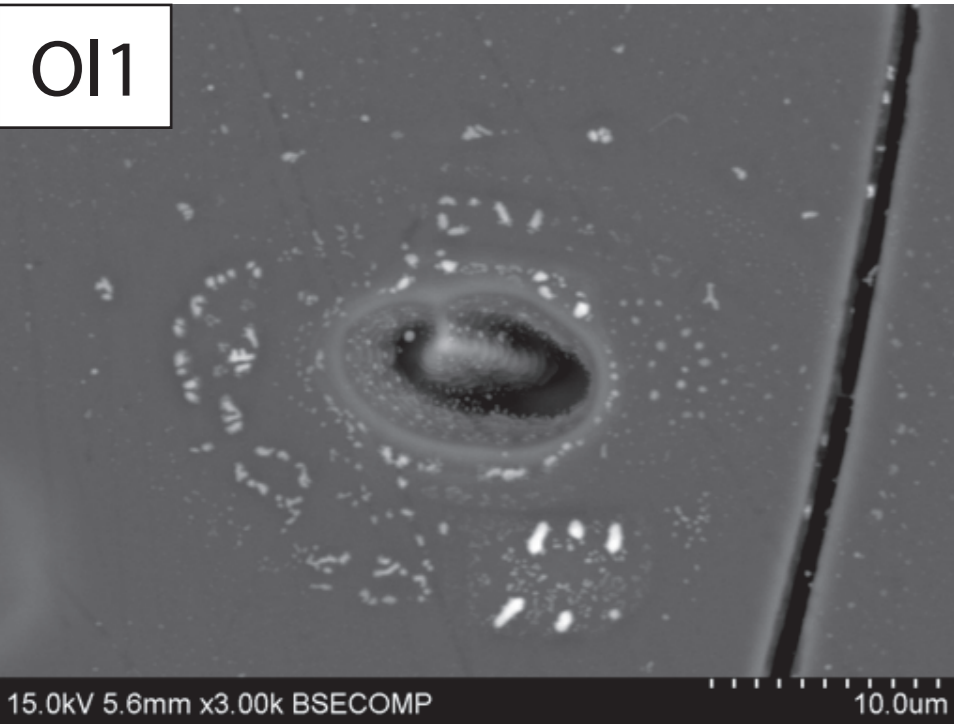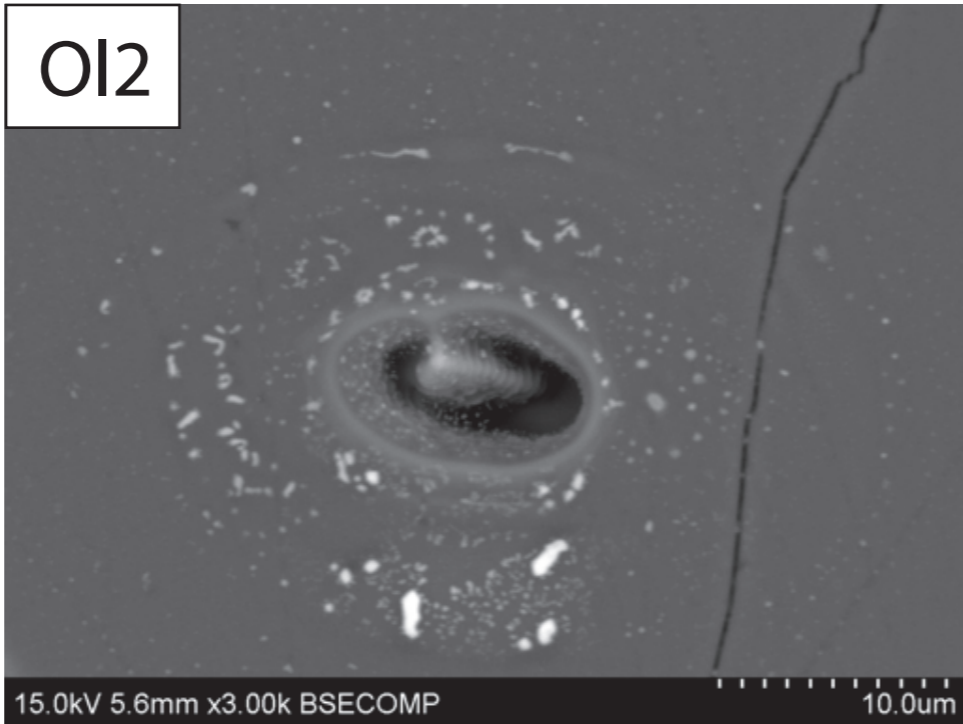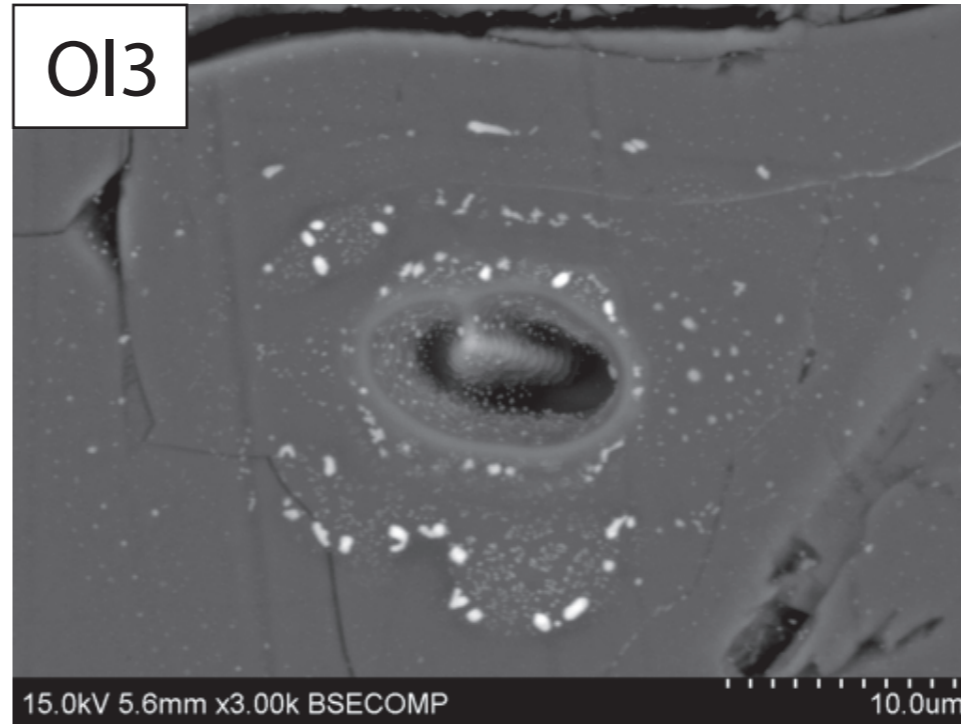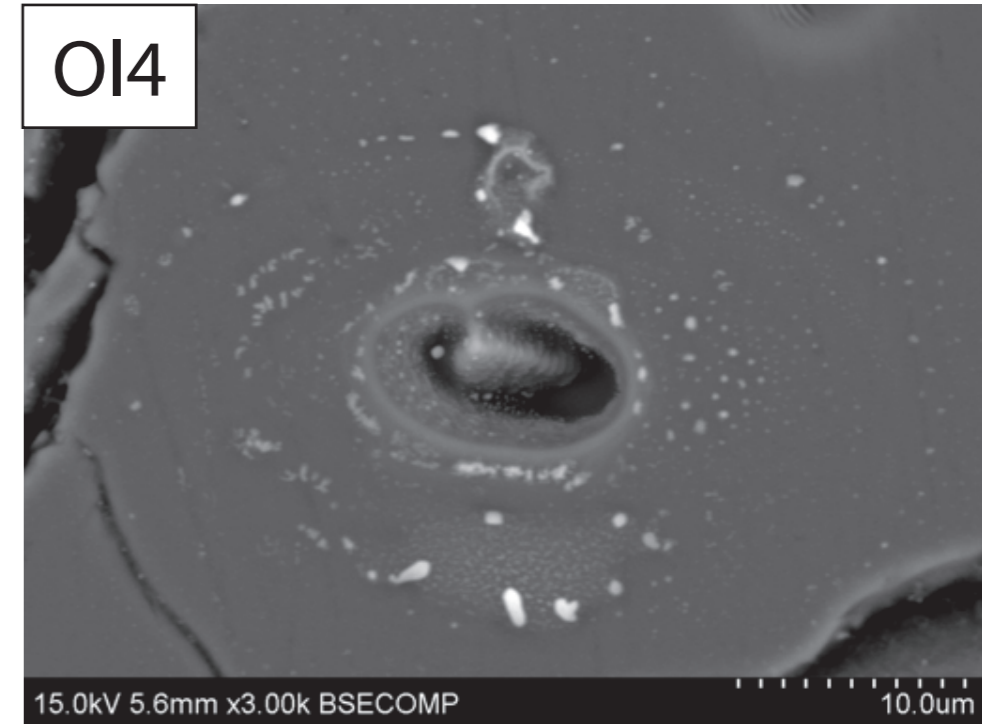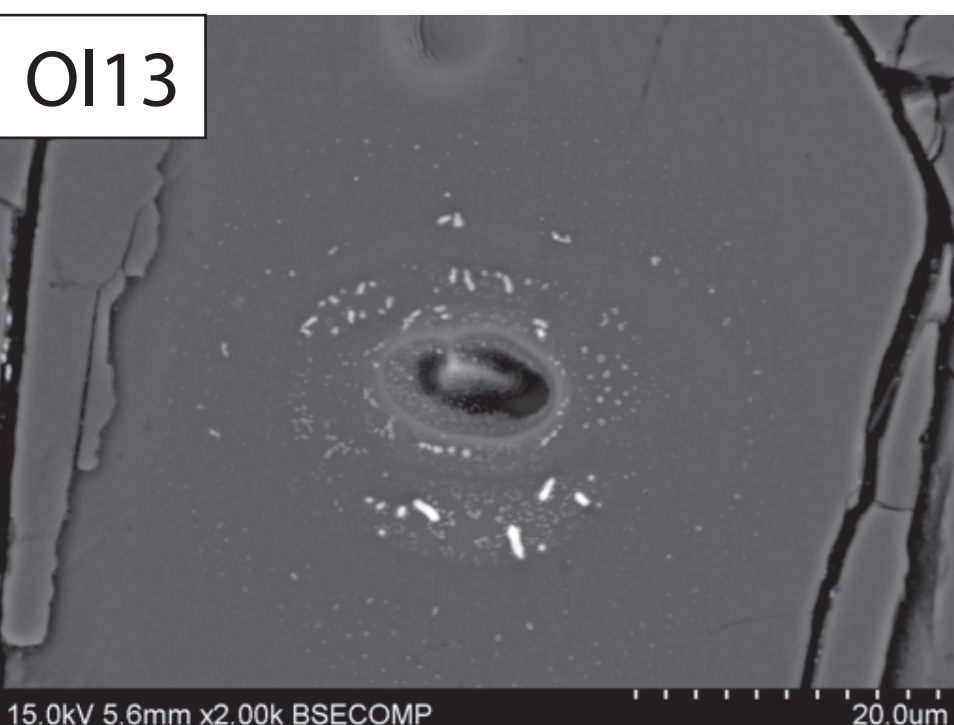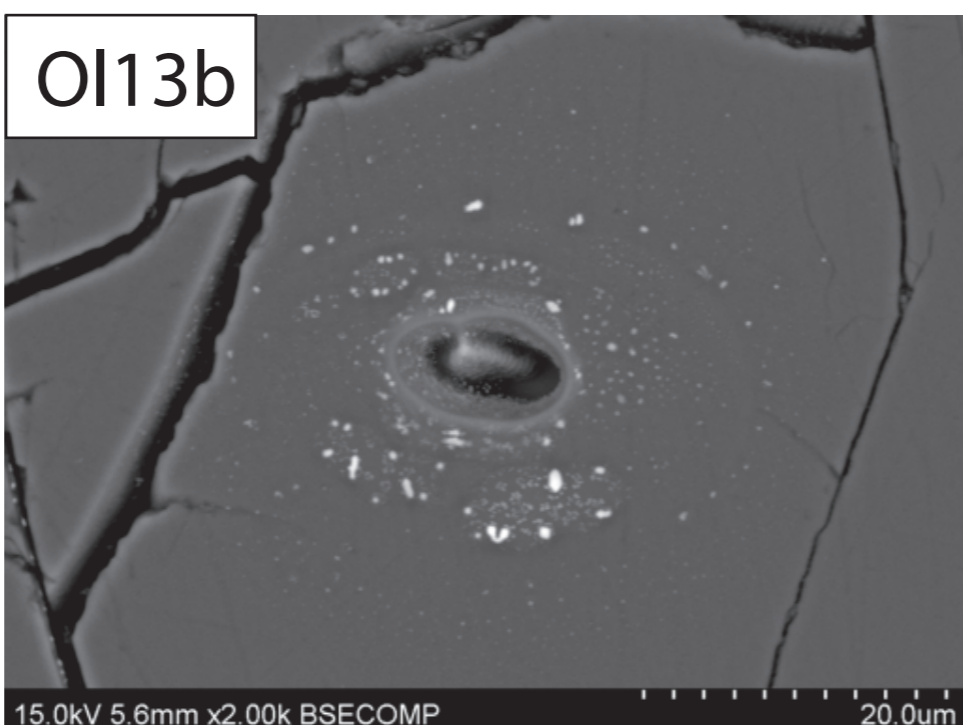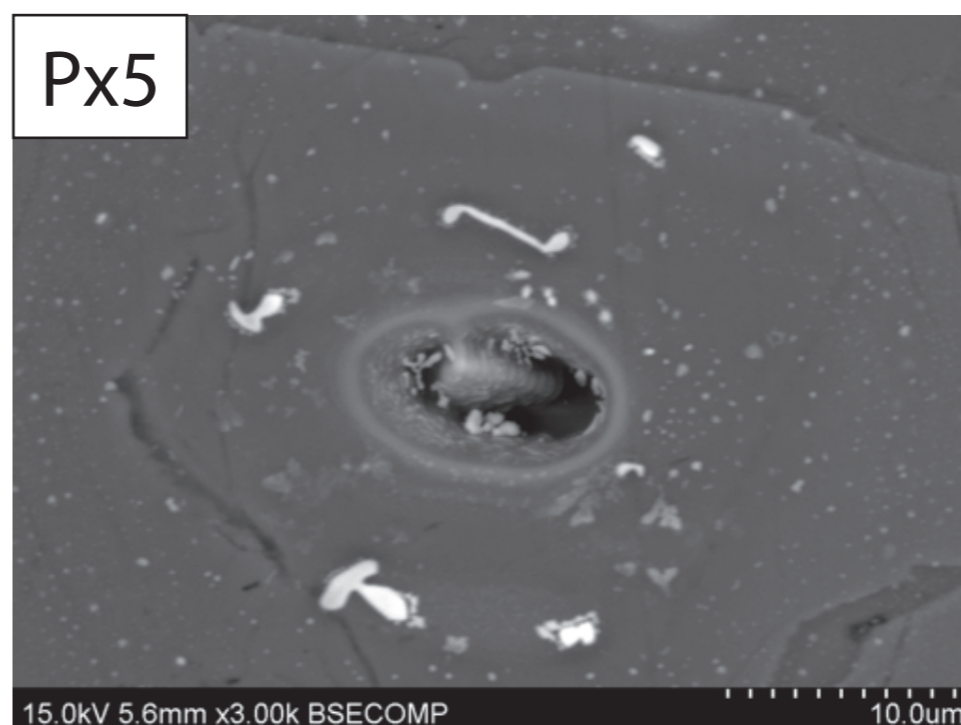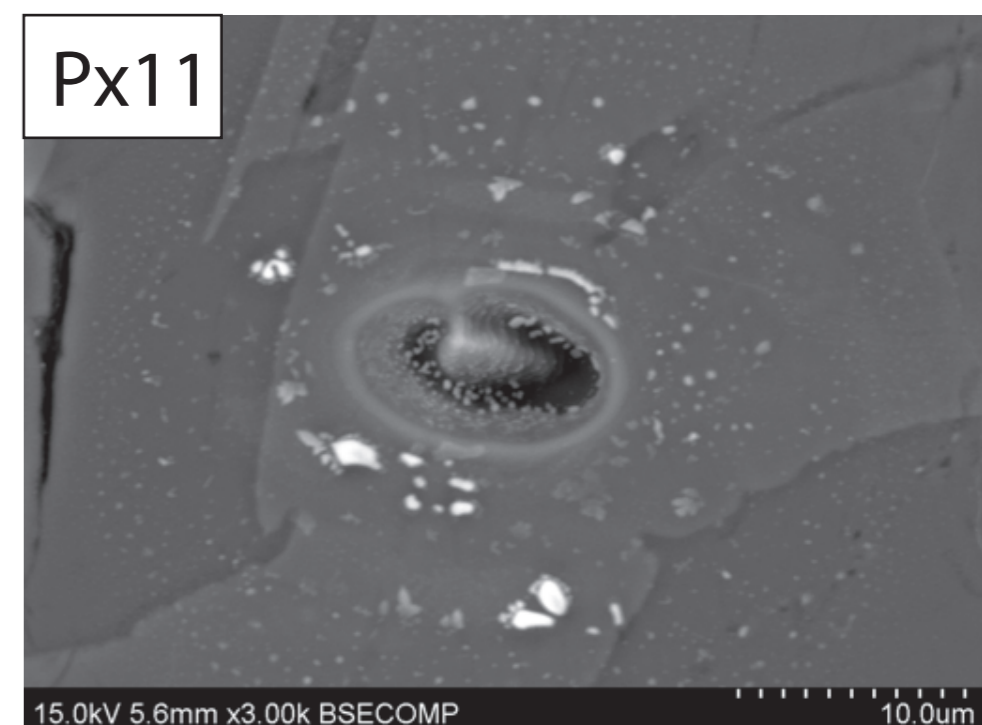

Ol-Px Al-Mg spots:

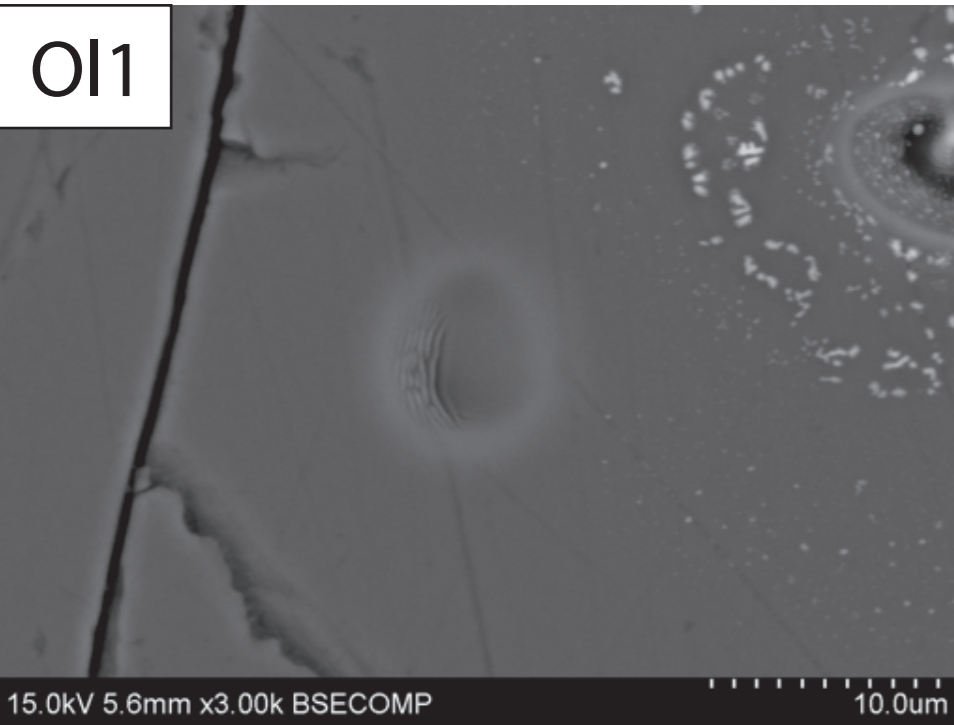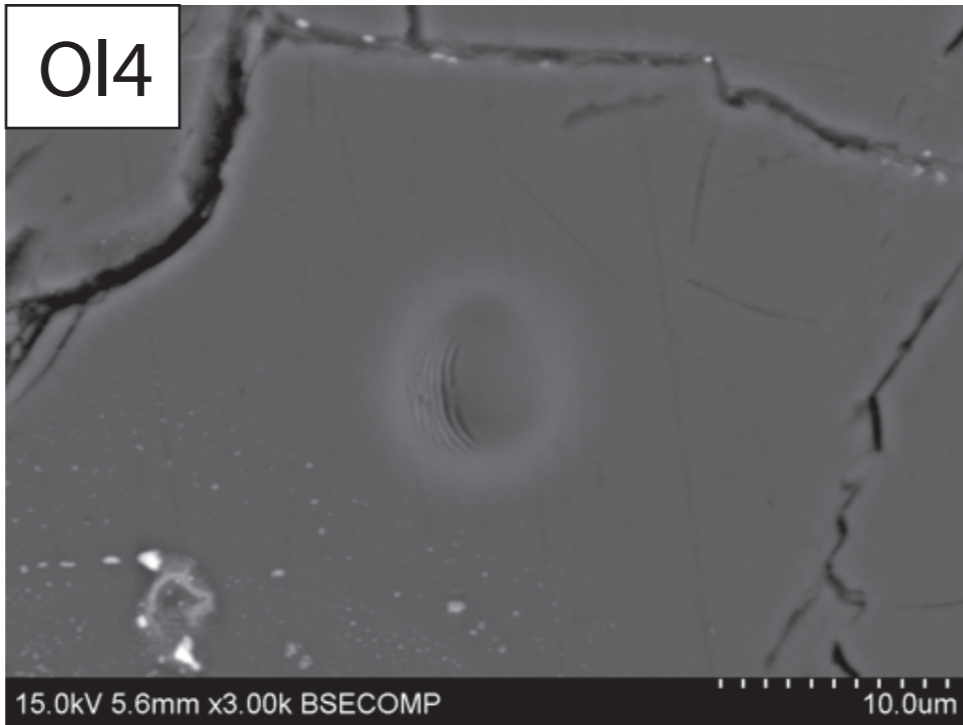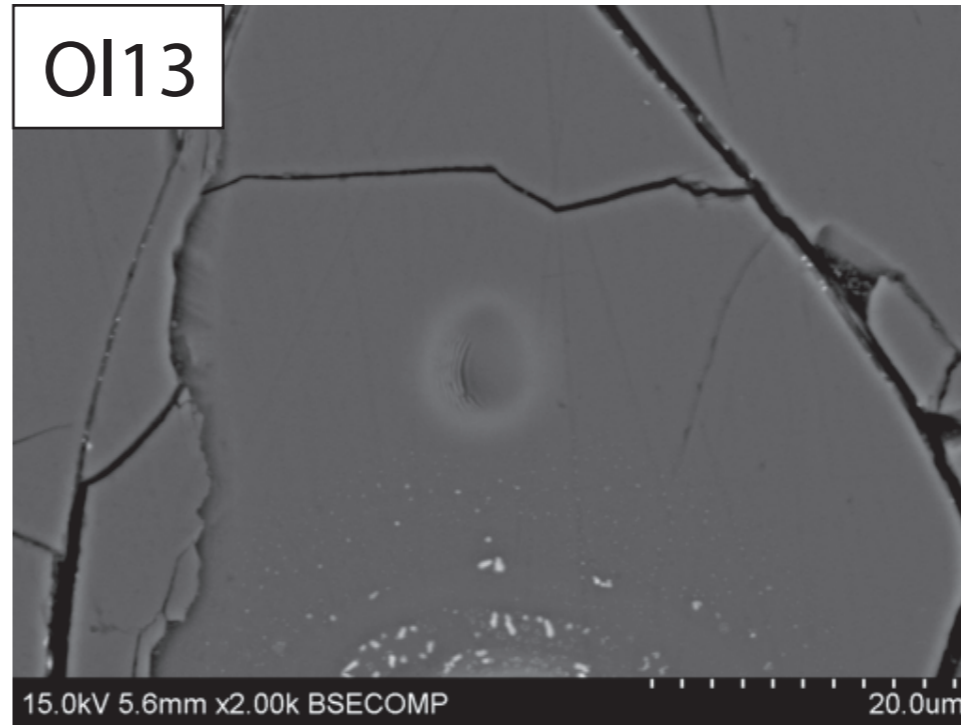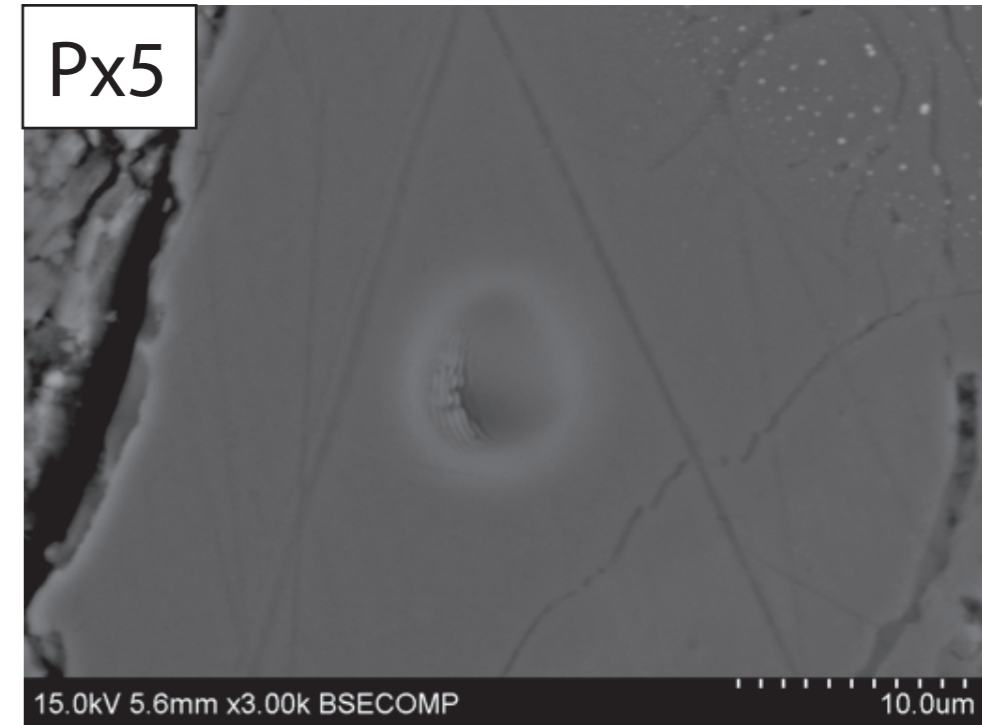

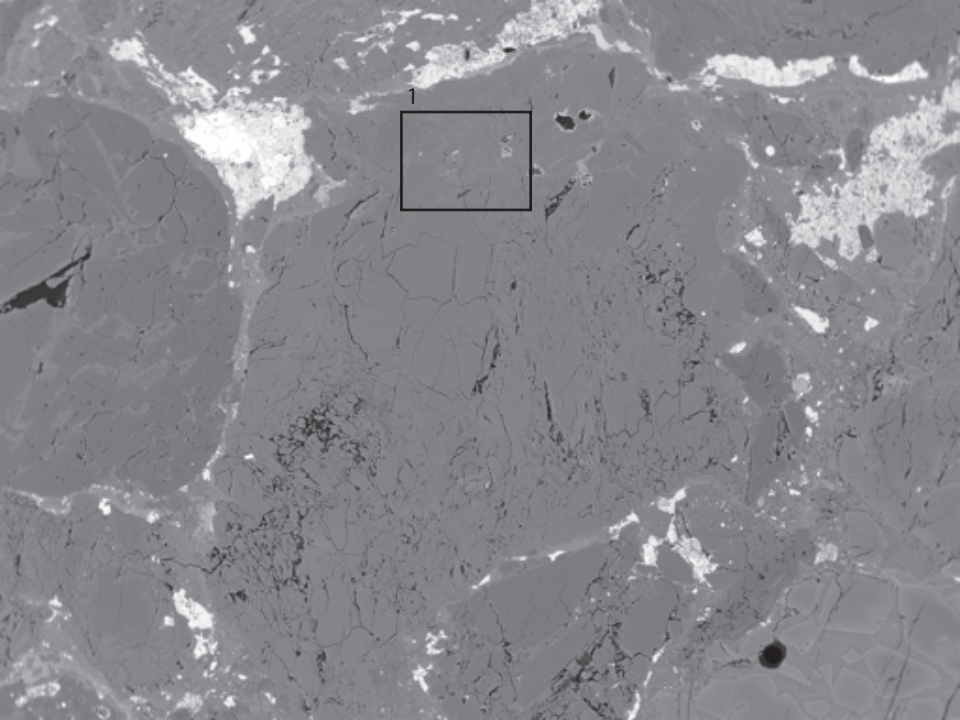

1

PI #2

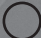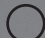

PI #9

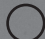

PI #6

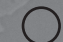

PI #3

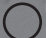

PI #7

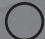

PI #1

50  $\mu$ m

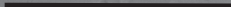

# An Al-Mg spots:

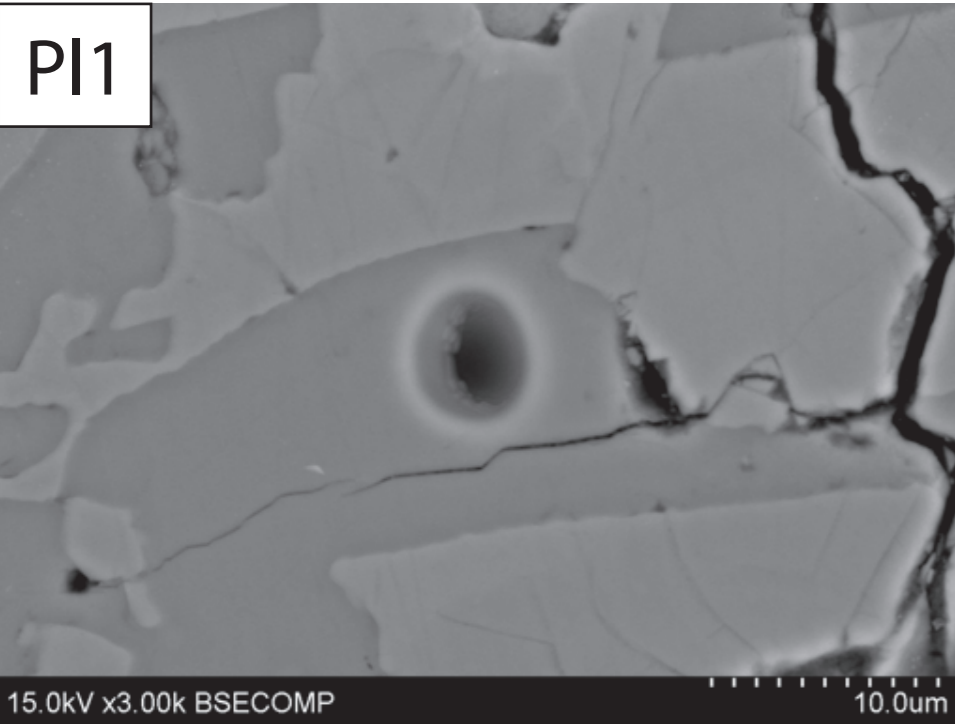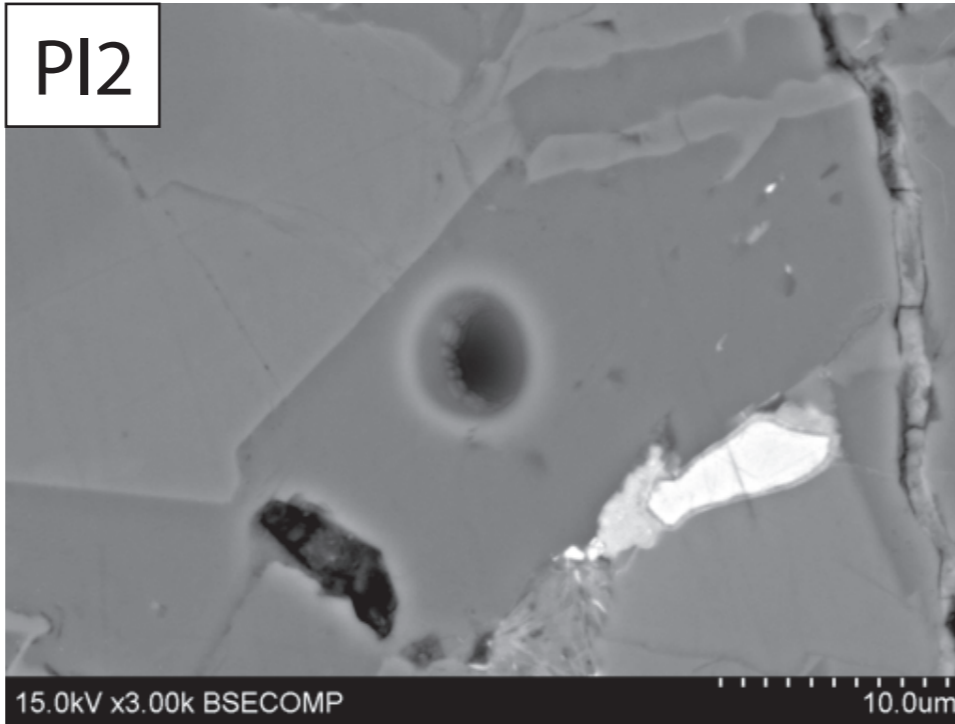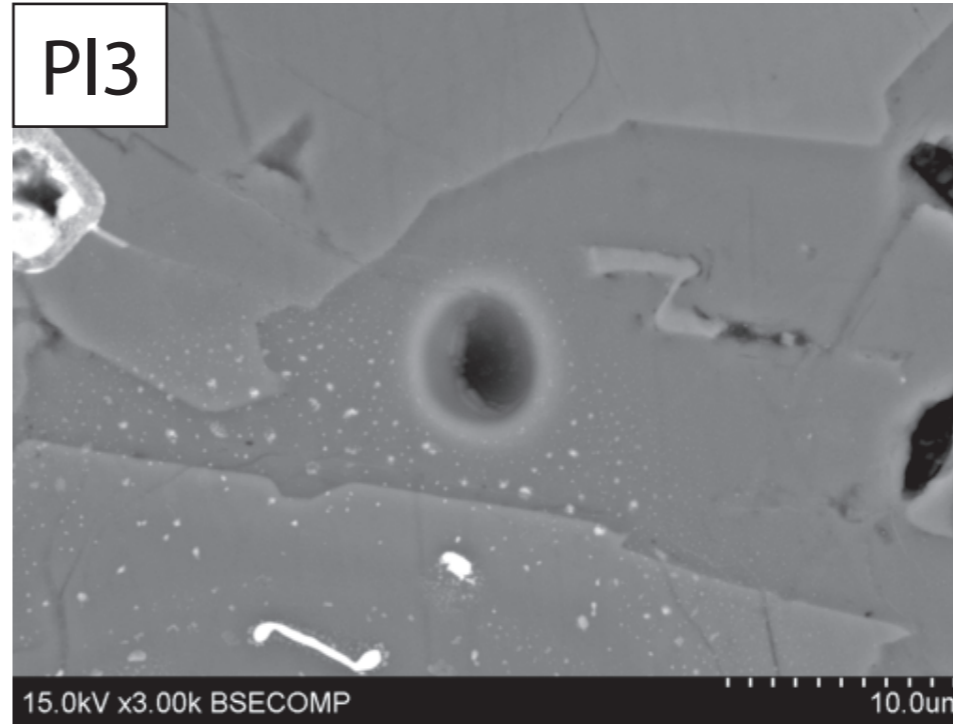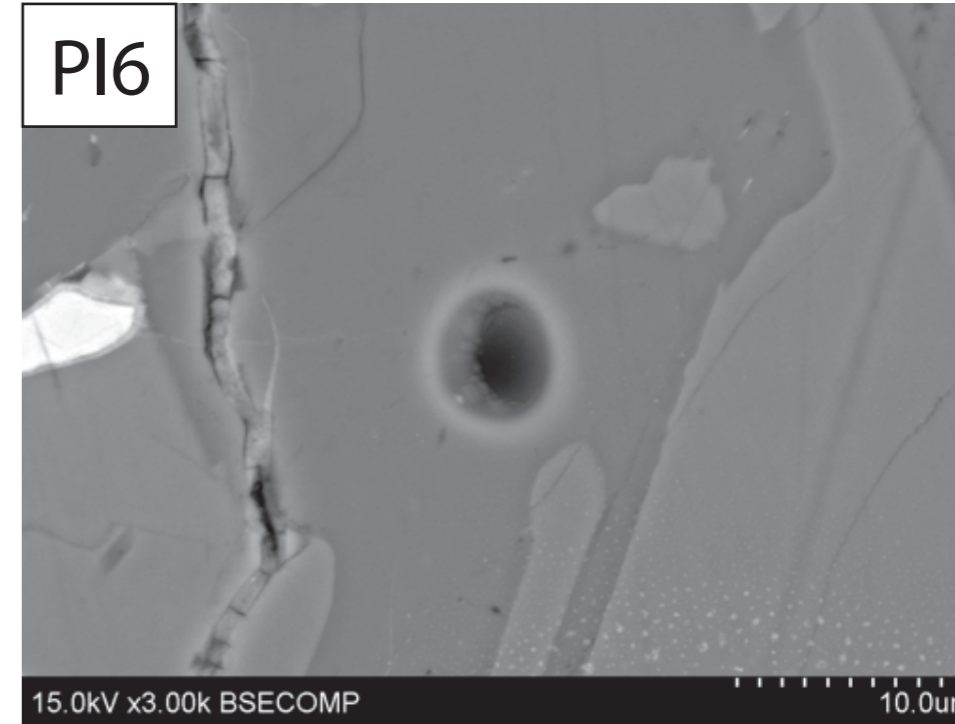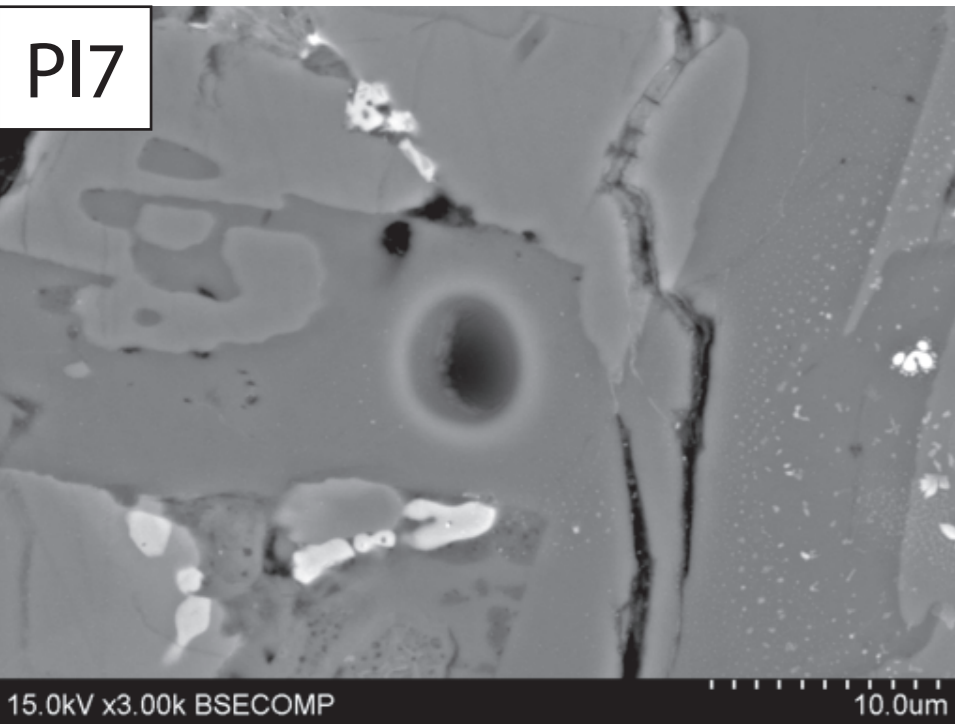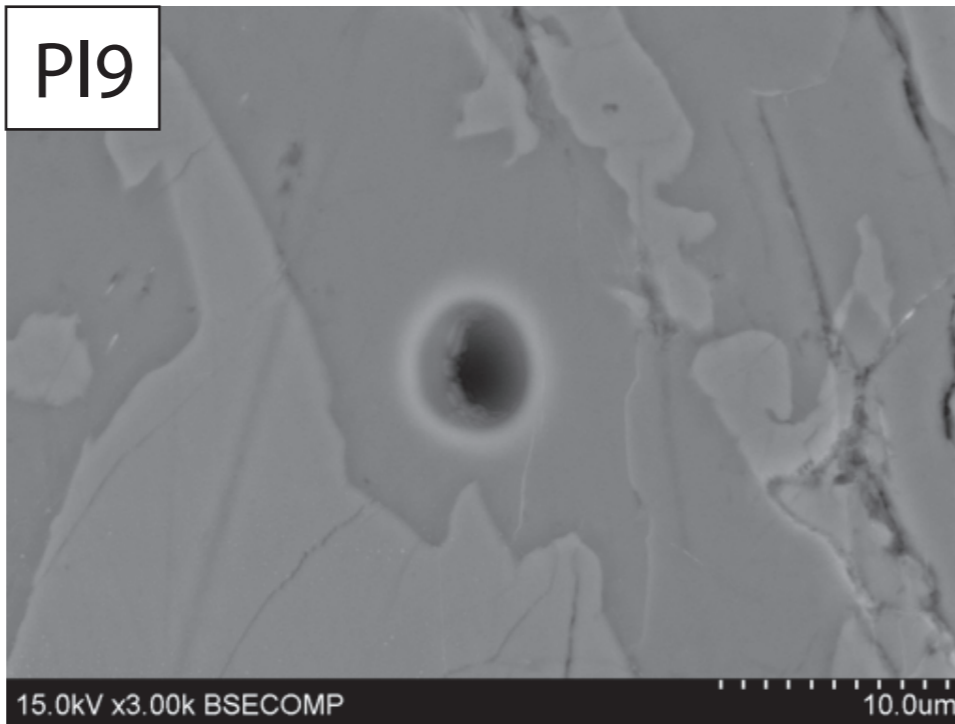

Supplement: NIHMS1757327-supplement-EA6-1.pdf [file NIHMS1757327-supplement-EA6-1.pdf]
