# Supplementary material
Source: PubMed Central journal article supplement (PMC8740609)

Electronic Annex EA 6-2: Location of SIMS analyses for QUE 97008 c61  
New constraints from  $^{26}\text{Al}$ - $^{26}\text{Mg}$  chronology of anorthite  
bearing chondrules in unequilibrated ordinary chondrites  
*Guillaume Siron, Kohei Fukuda, Makoto Kimura, and Noriko T. Kita*

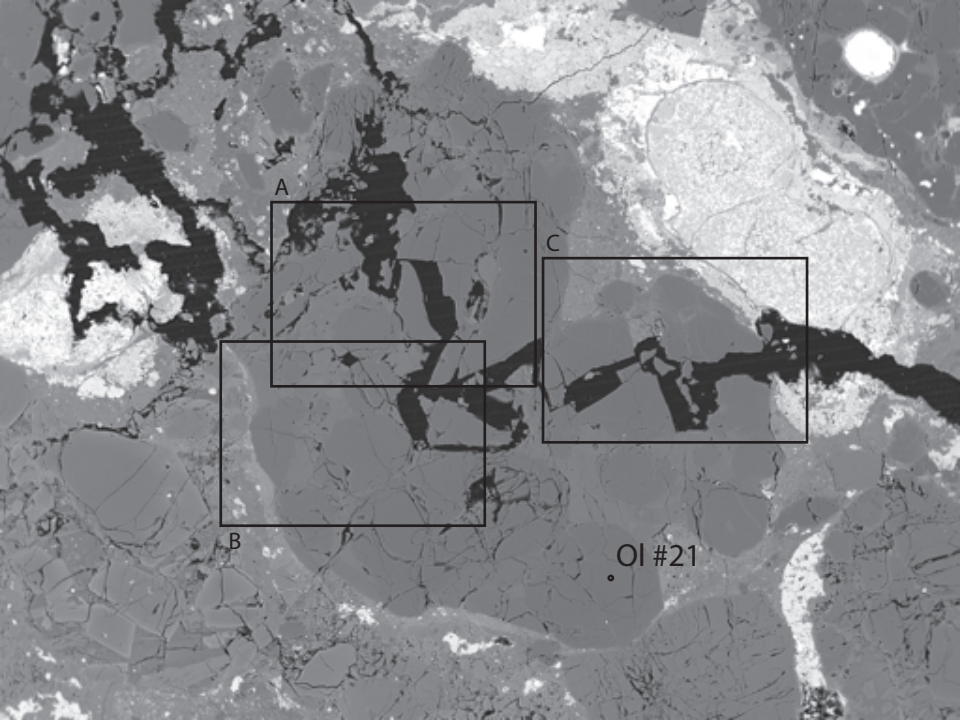

A

C

B

• OI #21

A

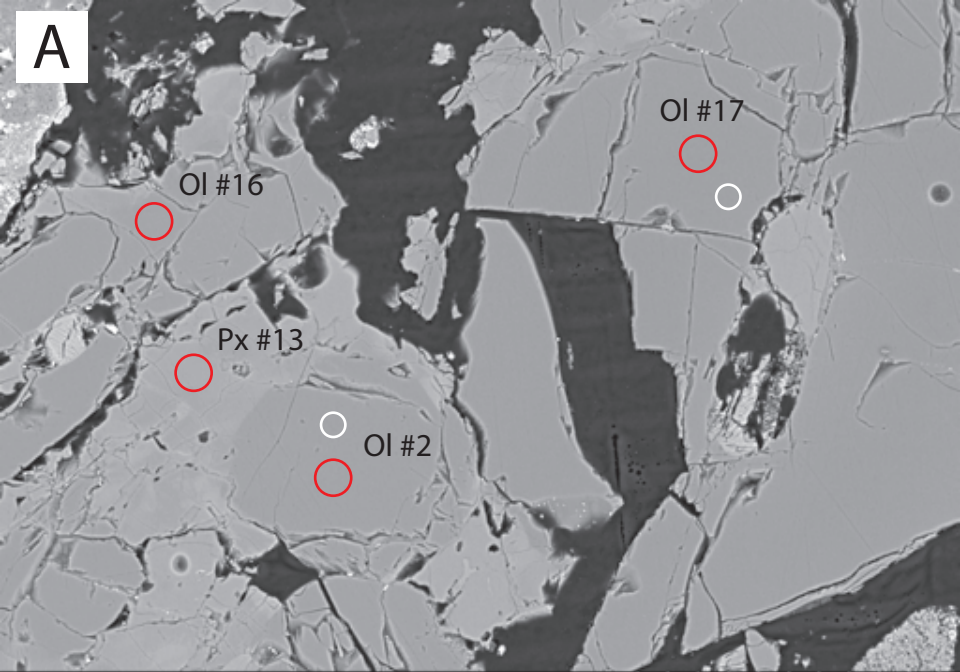

15.0kV 6.2mm x400 BSECOMP

100um

**B**

Ol #15

Ol #15b

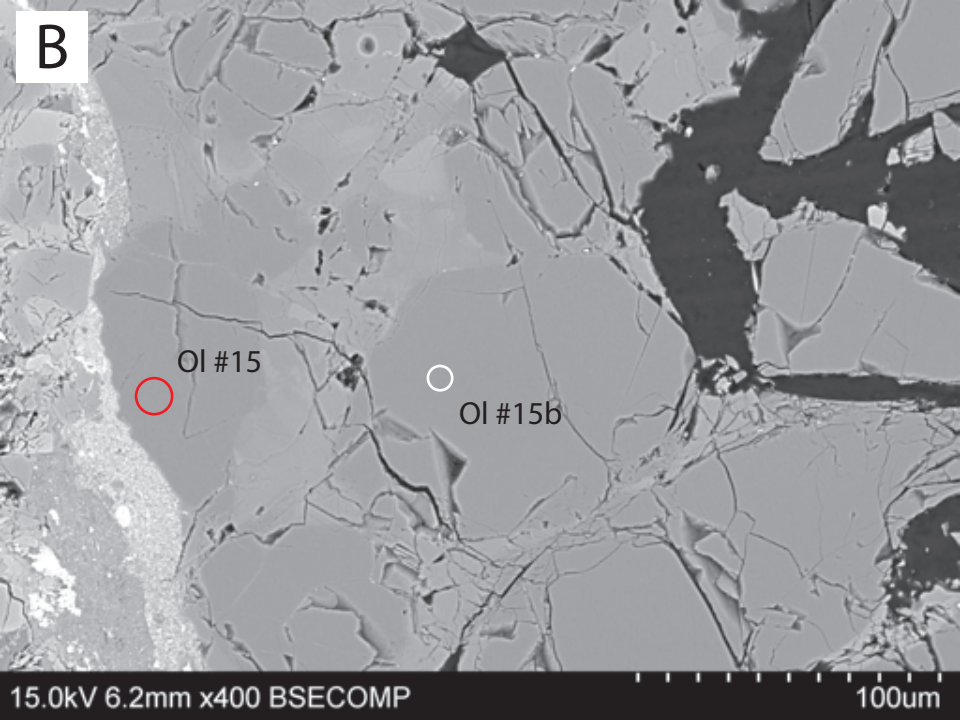

C

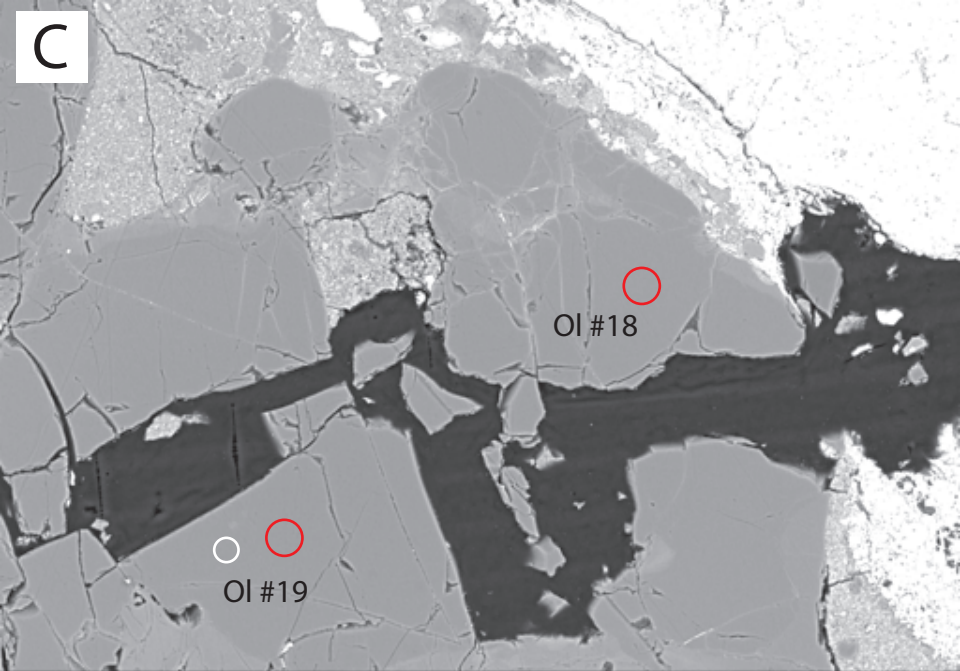

OI #18

OI #19

Ol-Px oxygen spots:

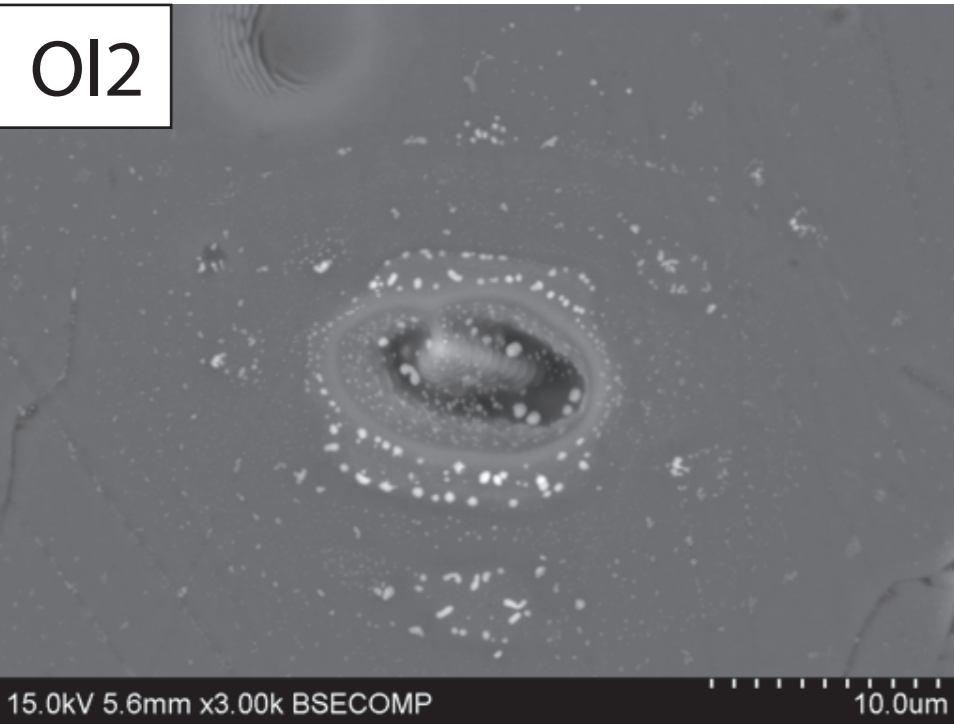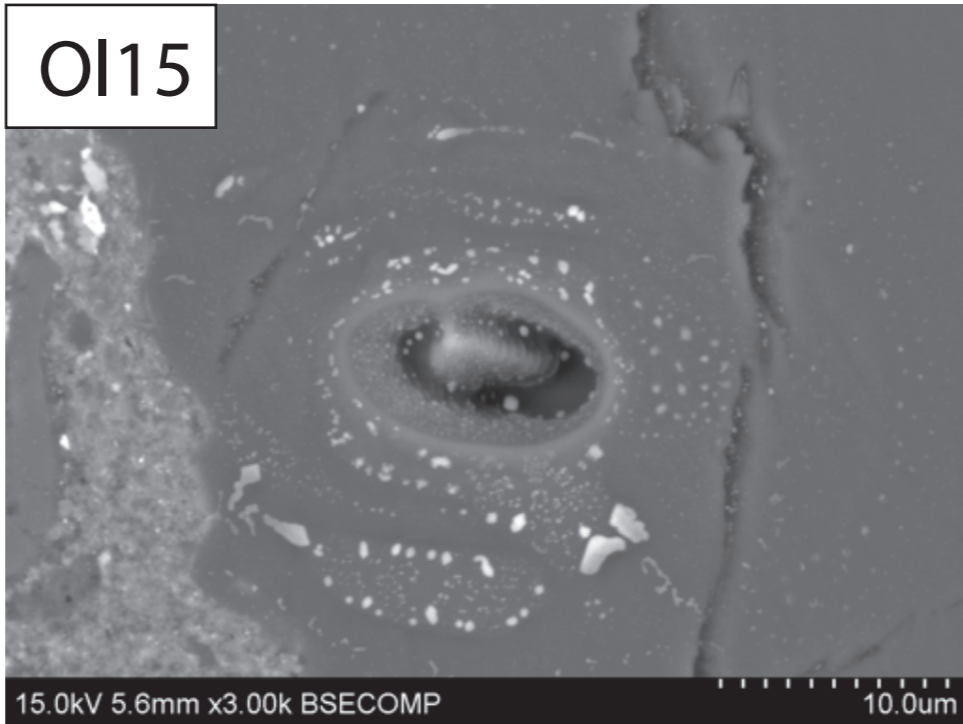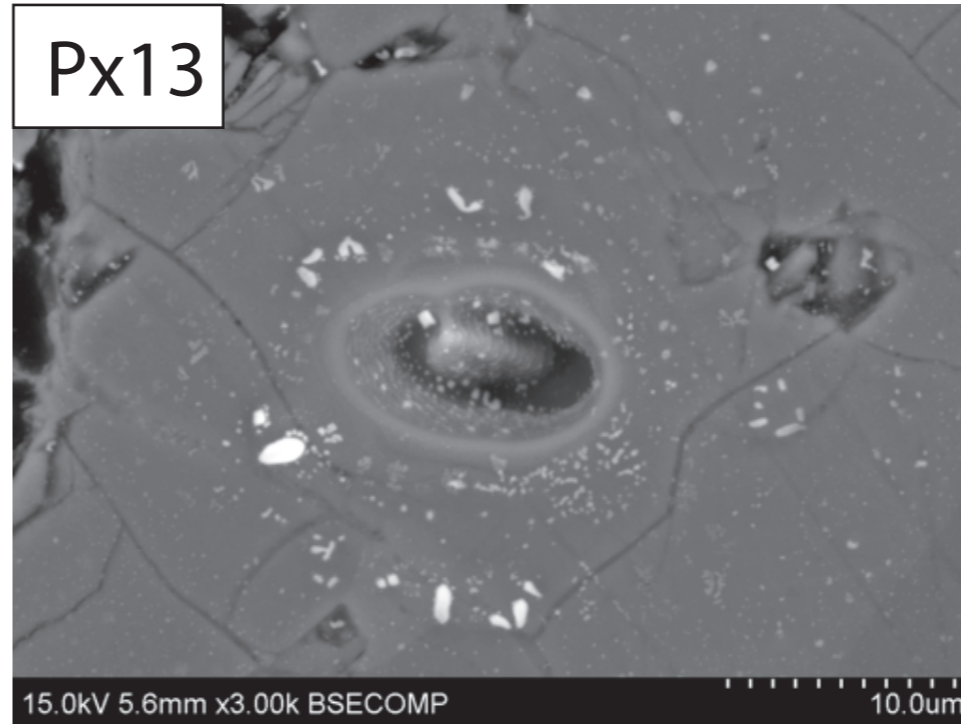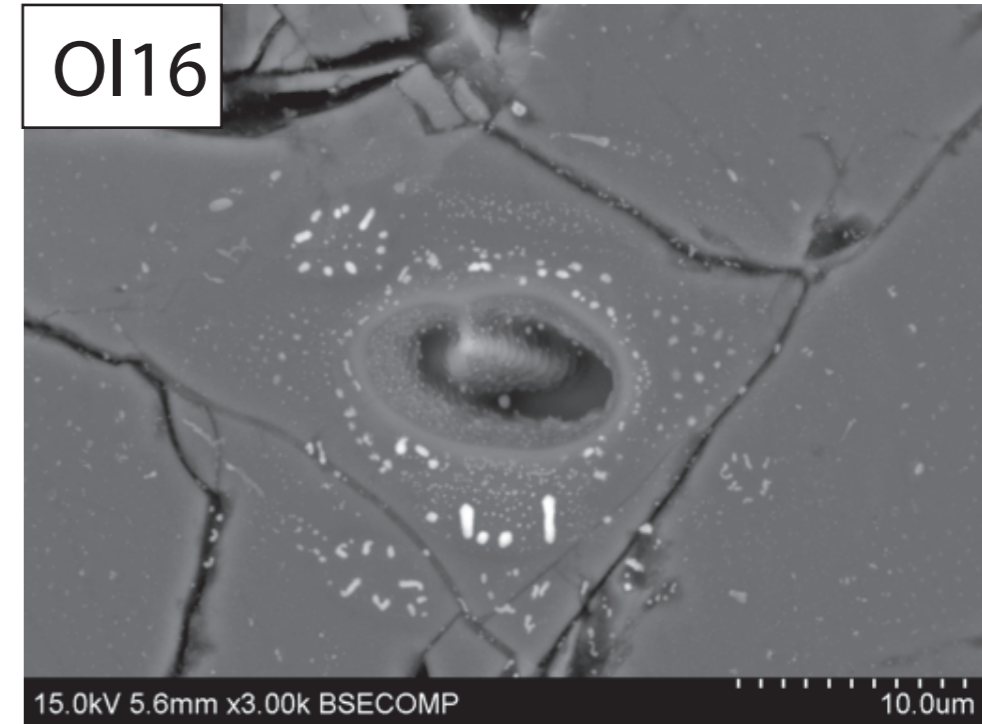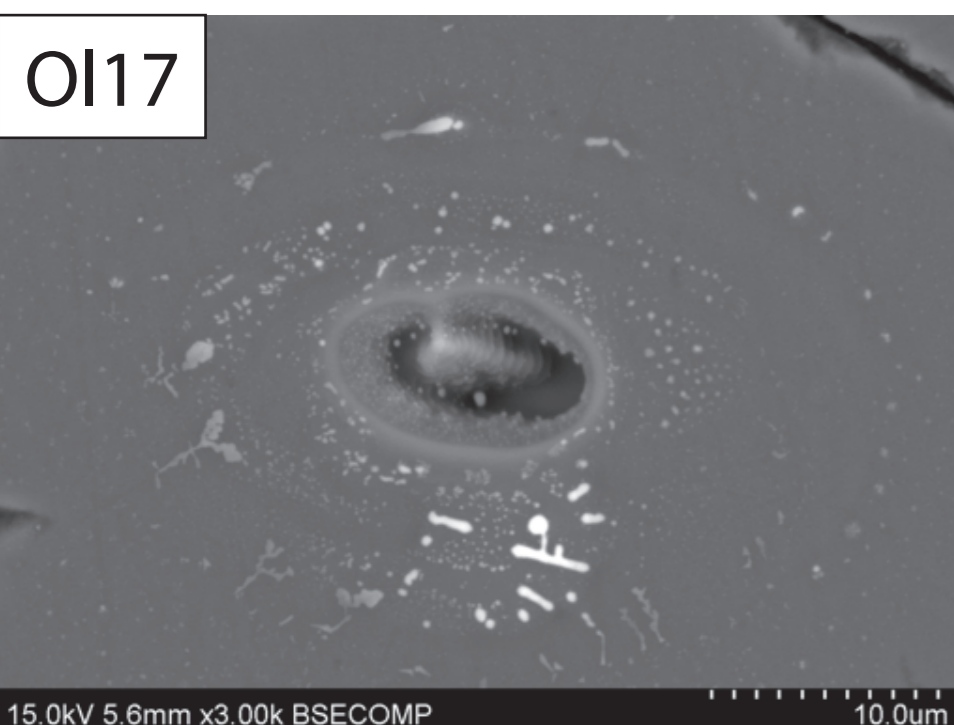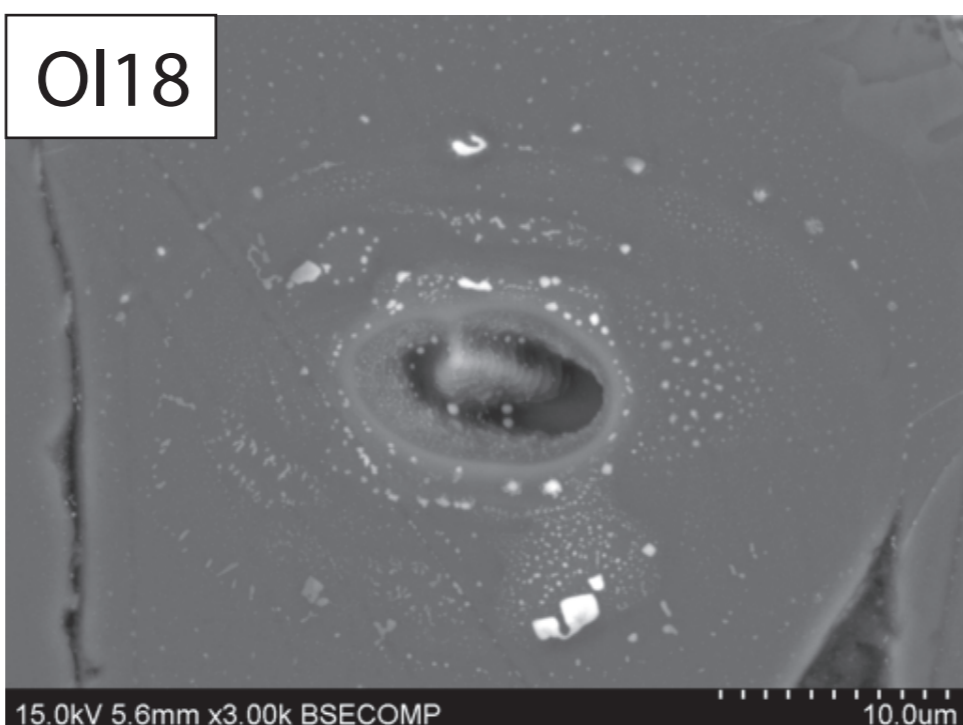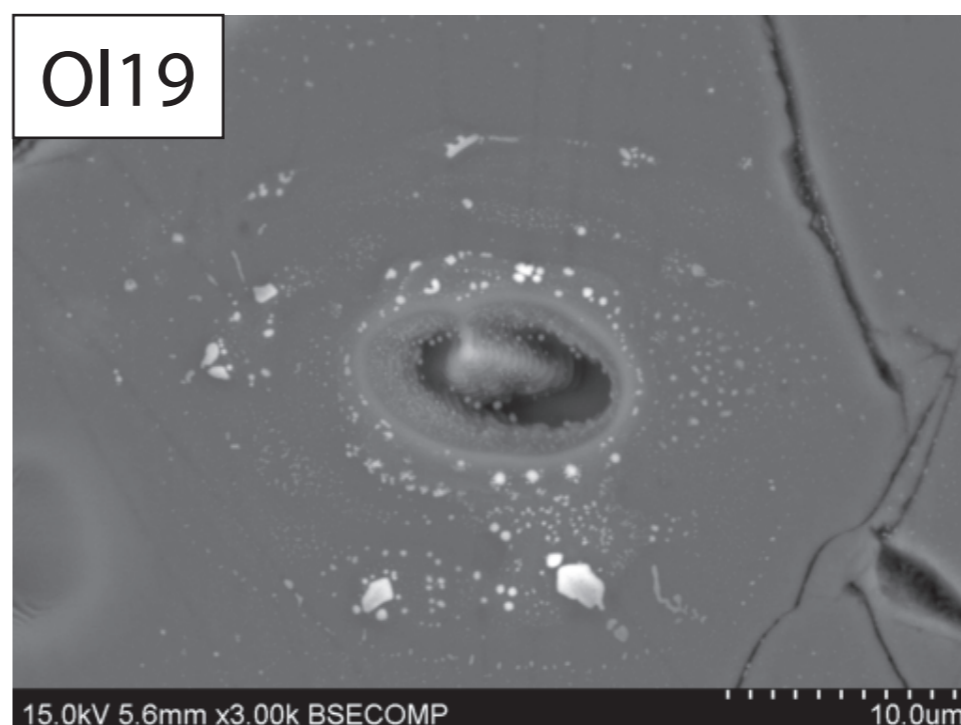

Ol-Px Al-Mg spots:

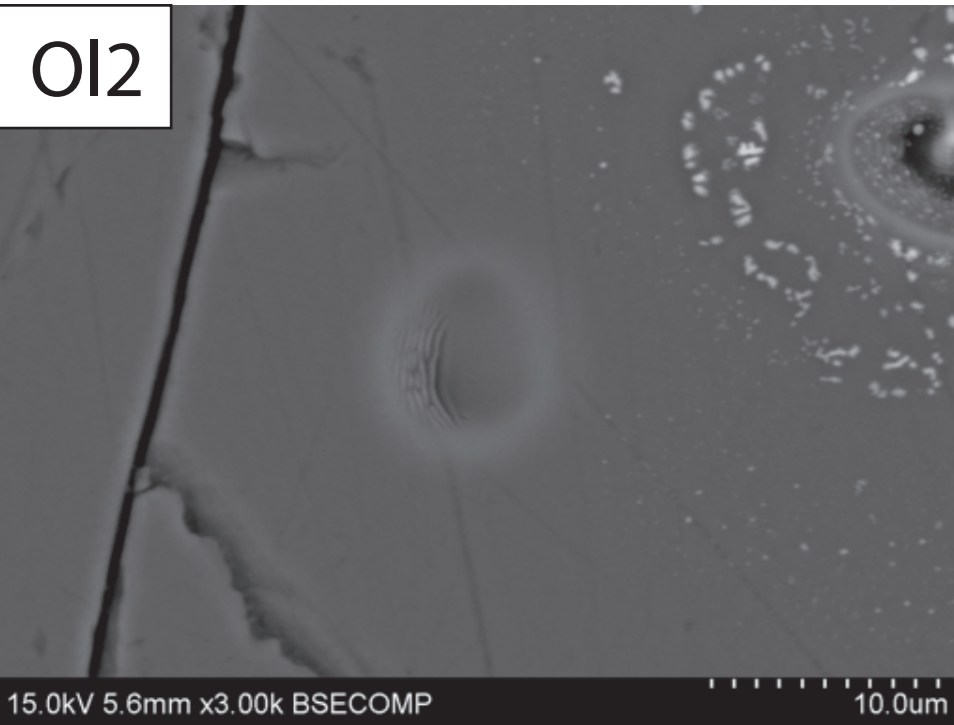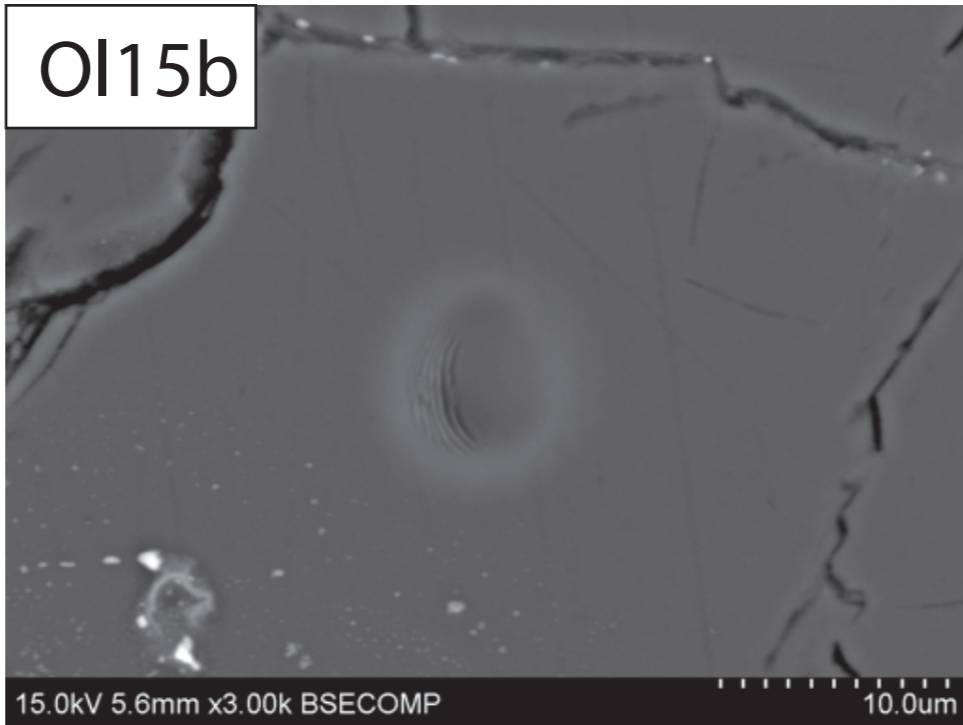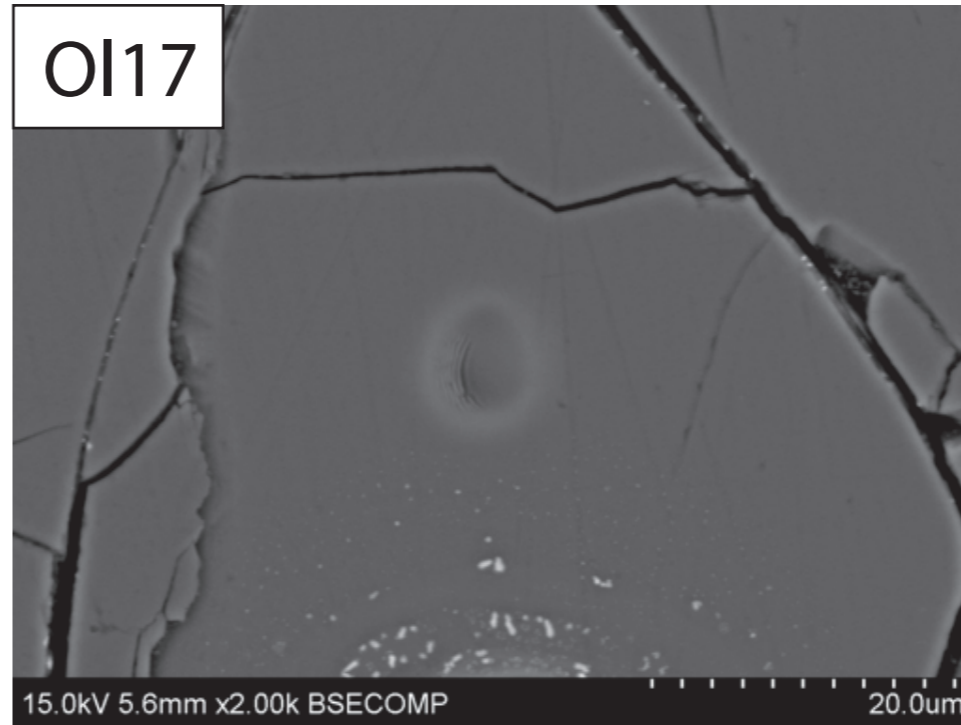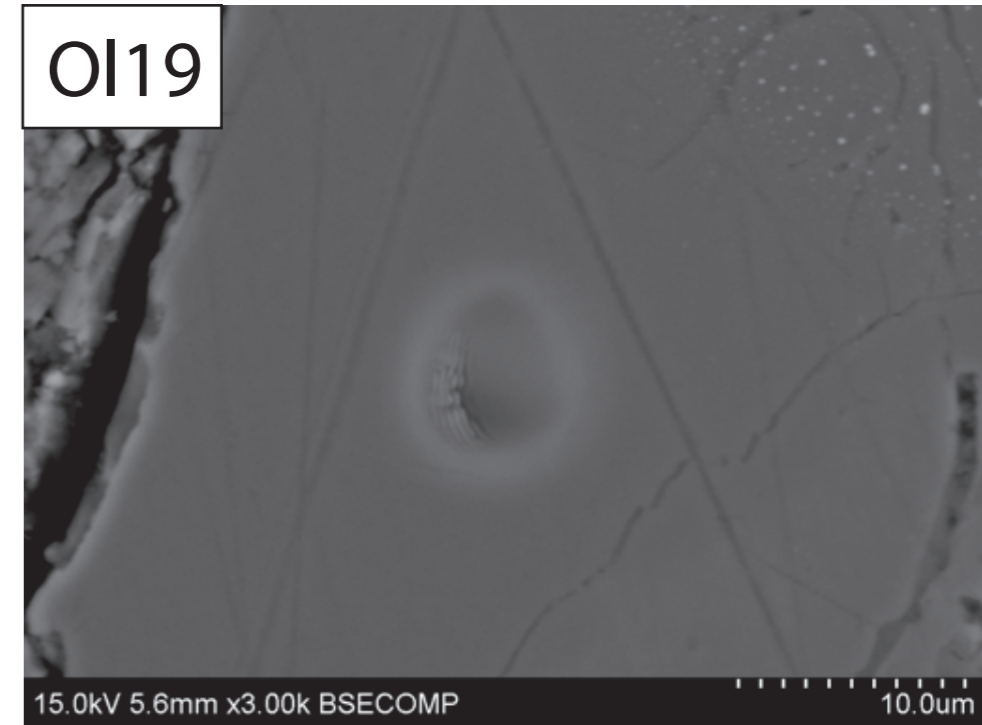

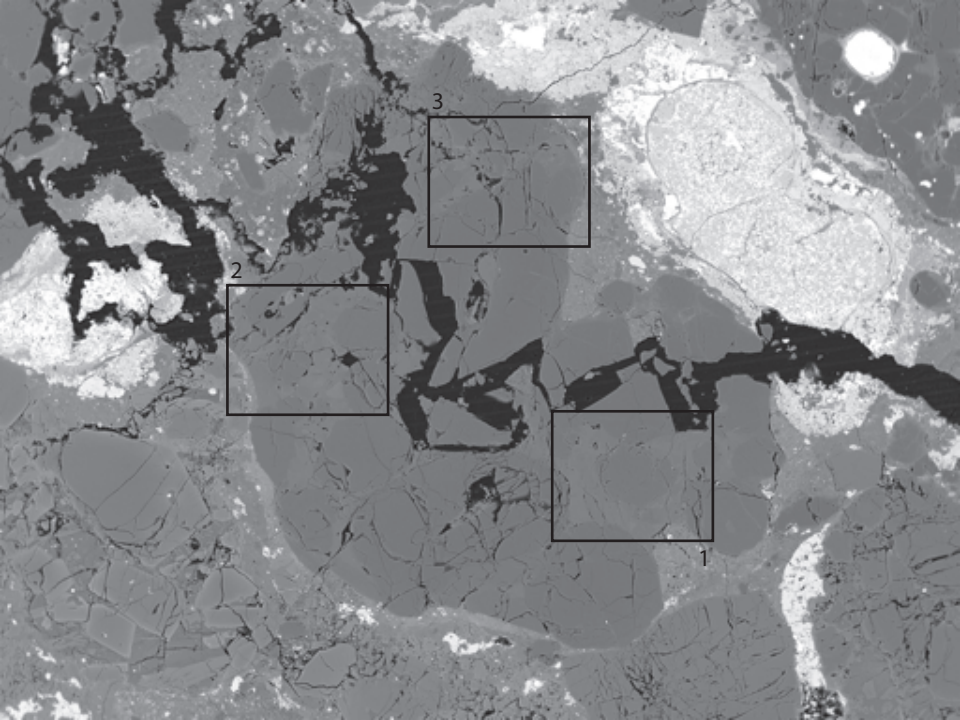

3

2

1

1

PI #7

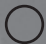

PI #2

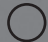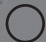

PI #1

50  $\mu$ m

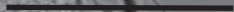



2

○  
PI #3

50  $\mu$ m

A grayscale micrograph showing a fractured material with a complex, irregular fracture pattern. The material is divided into various sized fragments by jagged, dark fracture lines. A prominent, dark, elongated feature is visible in the upper left quadrant. In the center-right, a small white circle is drawn around a specific point, with the text "PI #3" below it. In the bottom right corner, a horizontal black scale bar is present, with the text "50 μm" above it. The overall texture is rough and porous.

3

PI #5

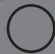

50  $\mu\text{m}$

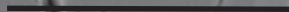

# An Al-Mg spots:

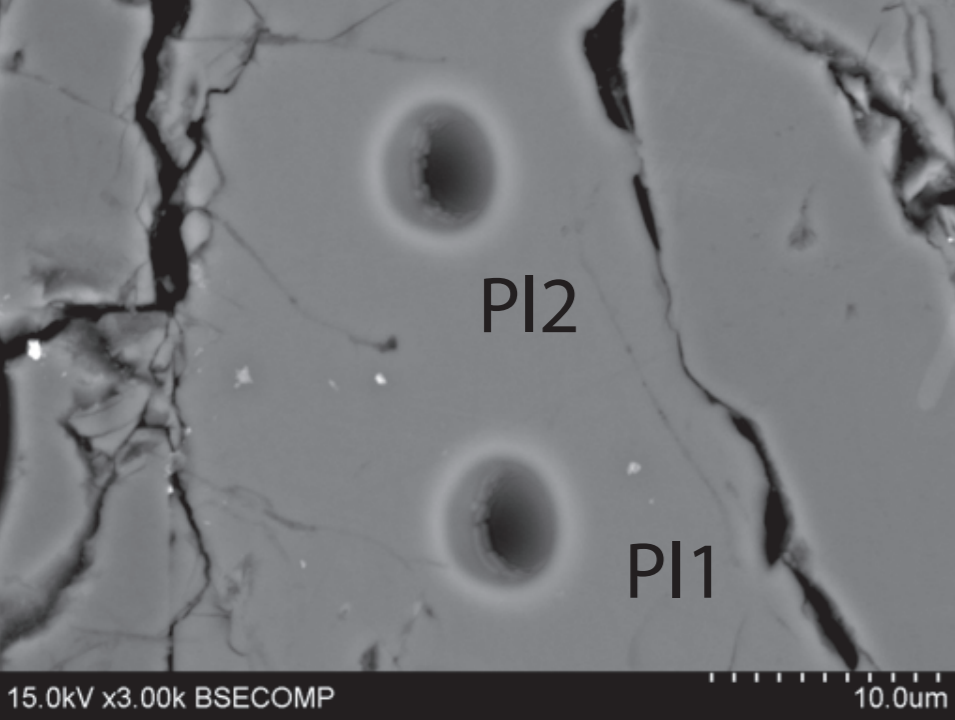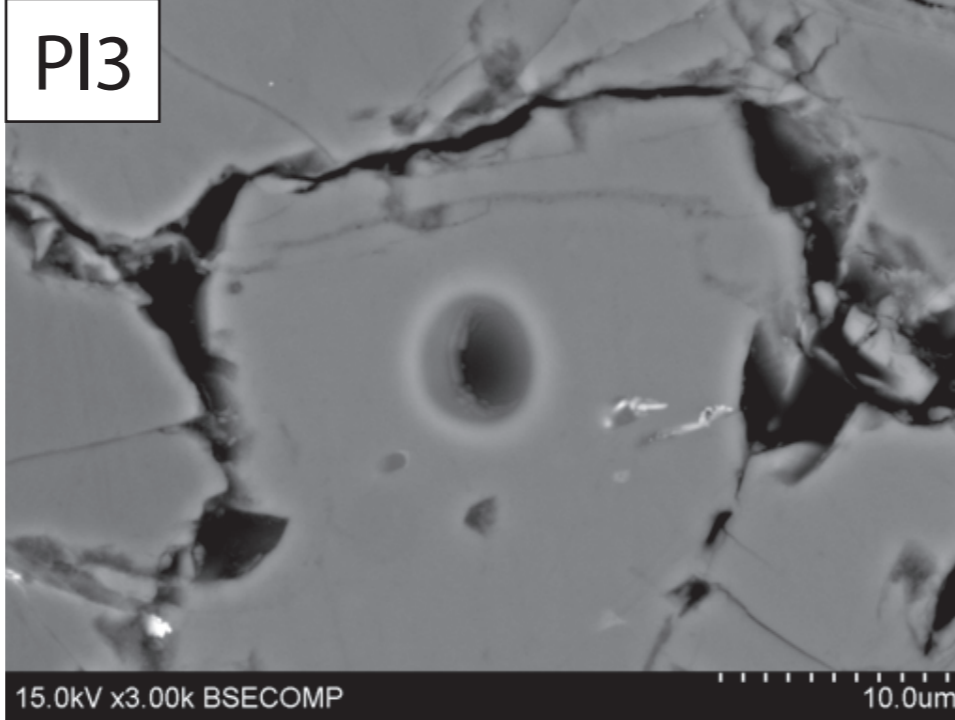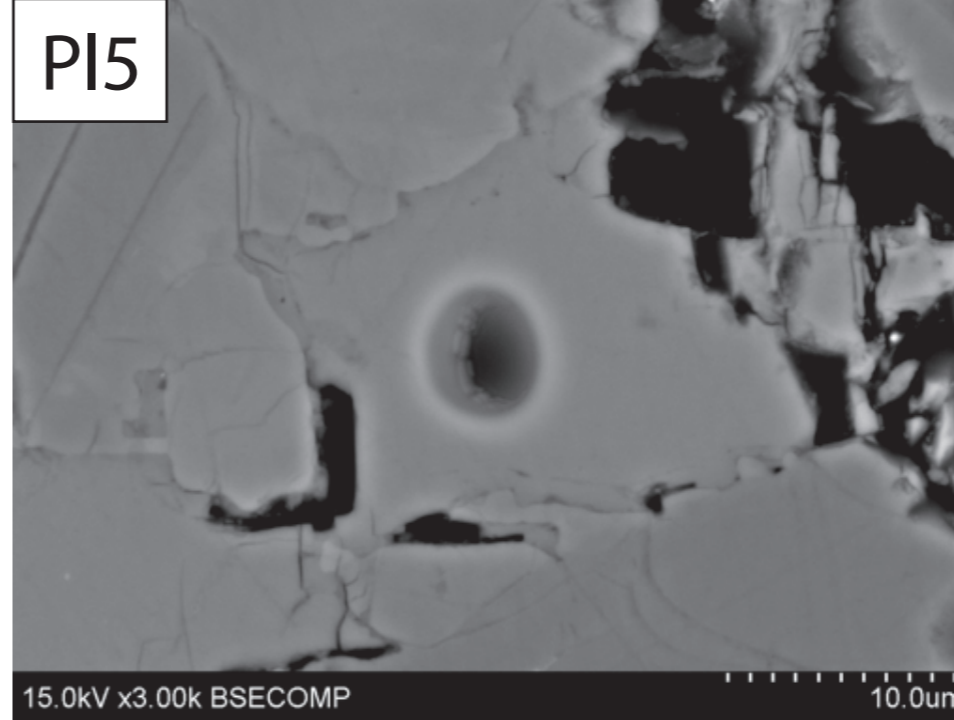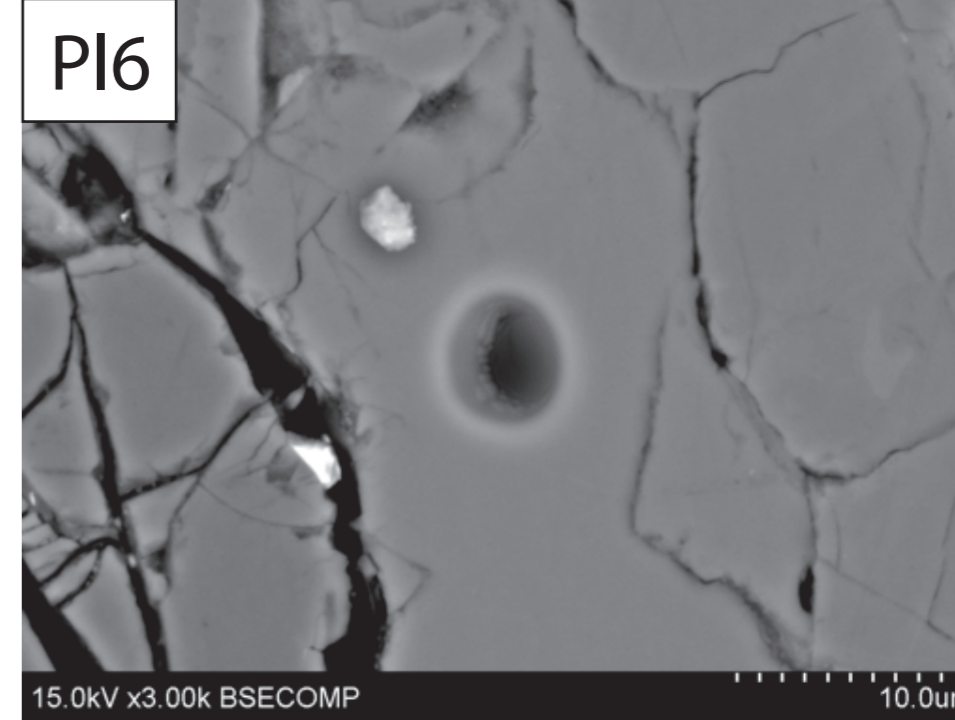

Supplement: NIHMS1757327-supplement-EA6-2.pdf [file NIHMS1757327-supplement-EA6-2.pdf]
