# Supplementary material
Source: PubMed Central journal article supplement (PMC8740609)

Electronic Annex EA 6-3: Location of SIMS analyses for QUE 97008 c143  
New constraints from  $^{26}\text{Al}$ - $^{26}\text{Mg}$  chronology of anorthite  
bearing chondrules in unequilibrated ordinary chondrites  
*Guillaume Siron, Kohei Fukuda, Makoto Kimura, and Noriko T. Kita*

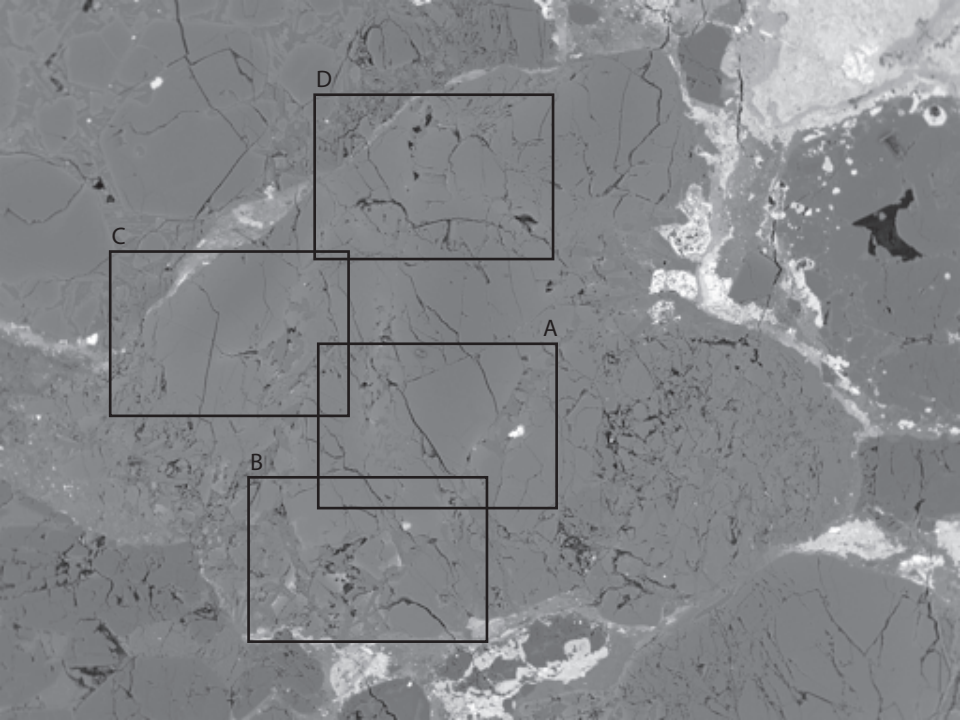

D

C

A

B

A

Ol #1

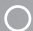

Px #15

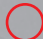

**B**

Ol #3

Px #14

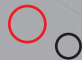

C

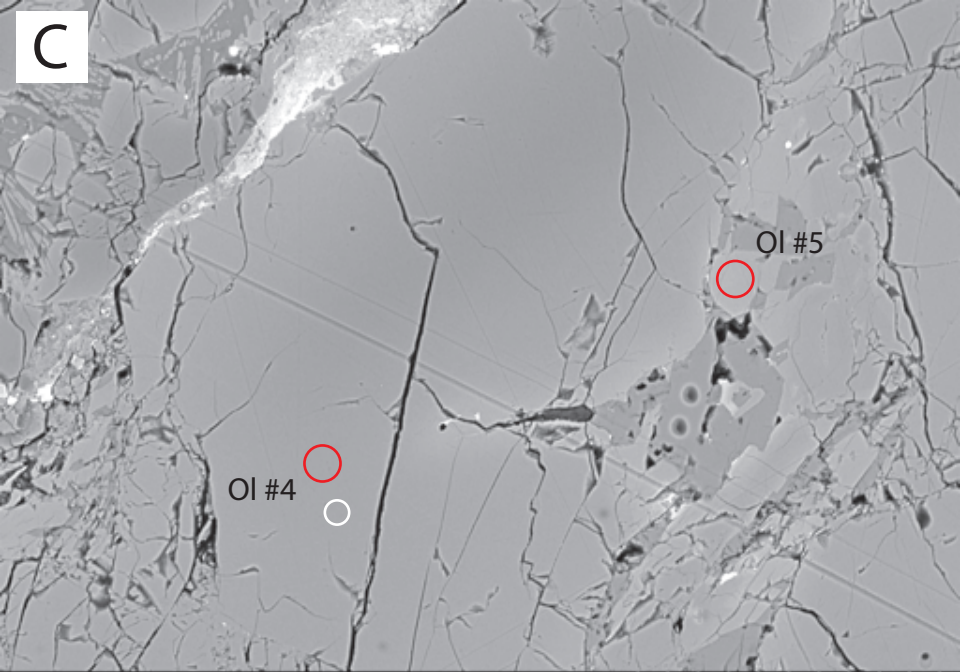

OI #4

OI #5

15.0kV 6.2mm x400 BSECOMP

100um

D

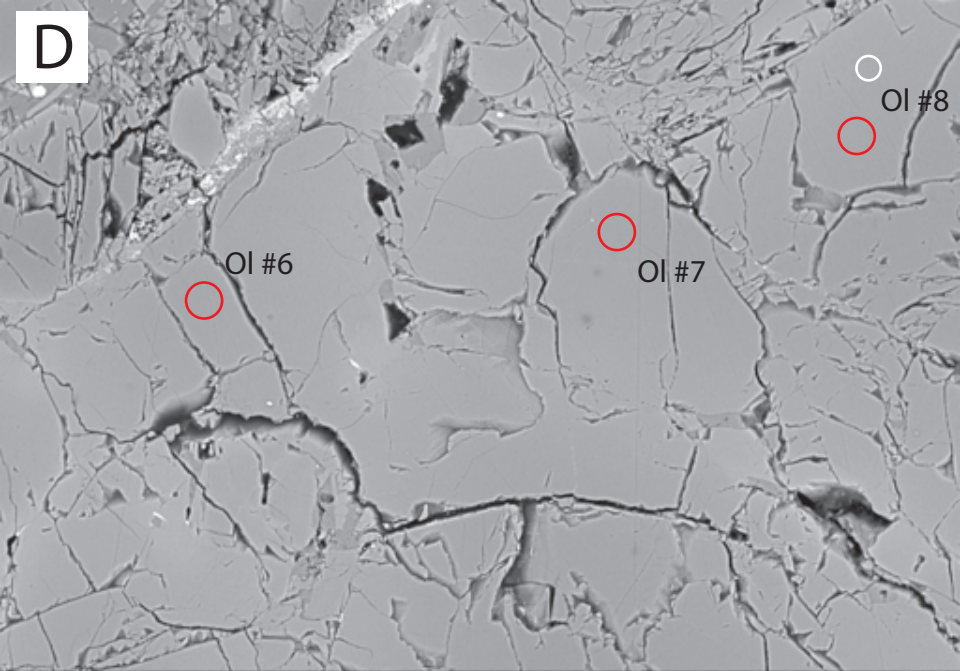

OI #6

OI #7

OI #8

Ol-Px oxygen spots:

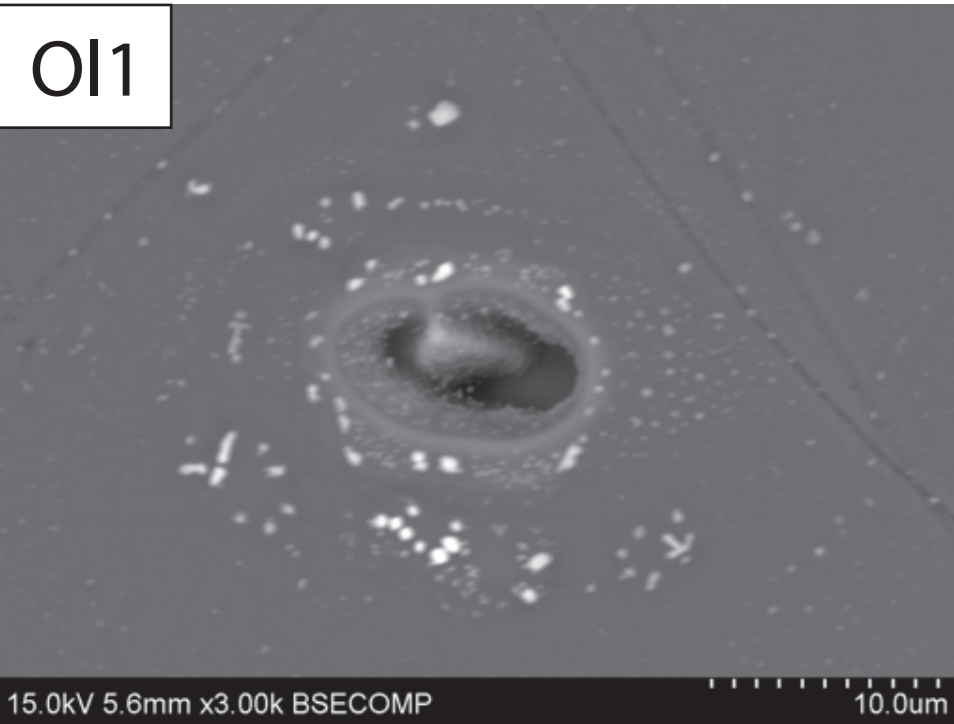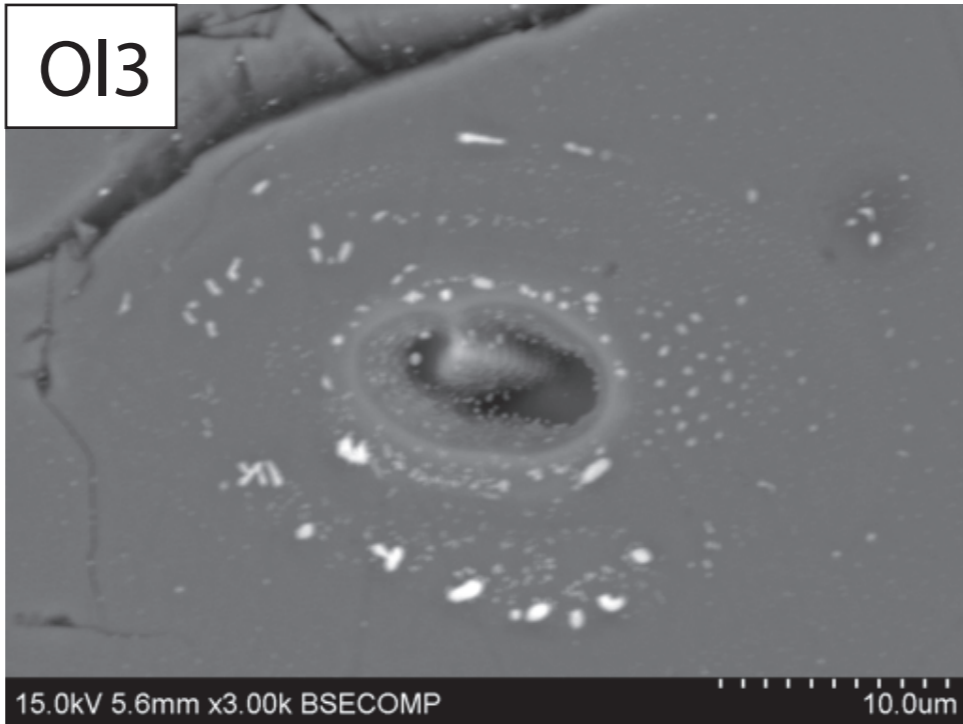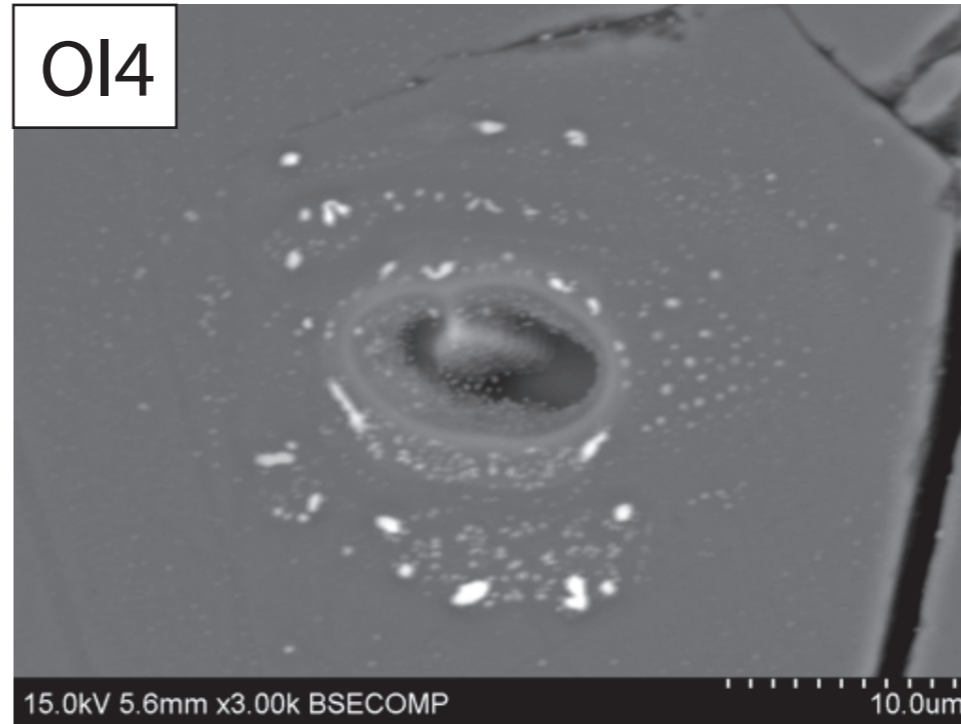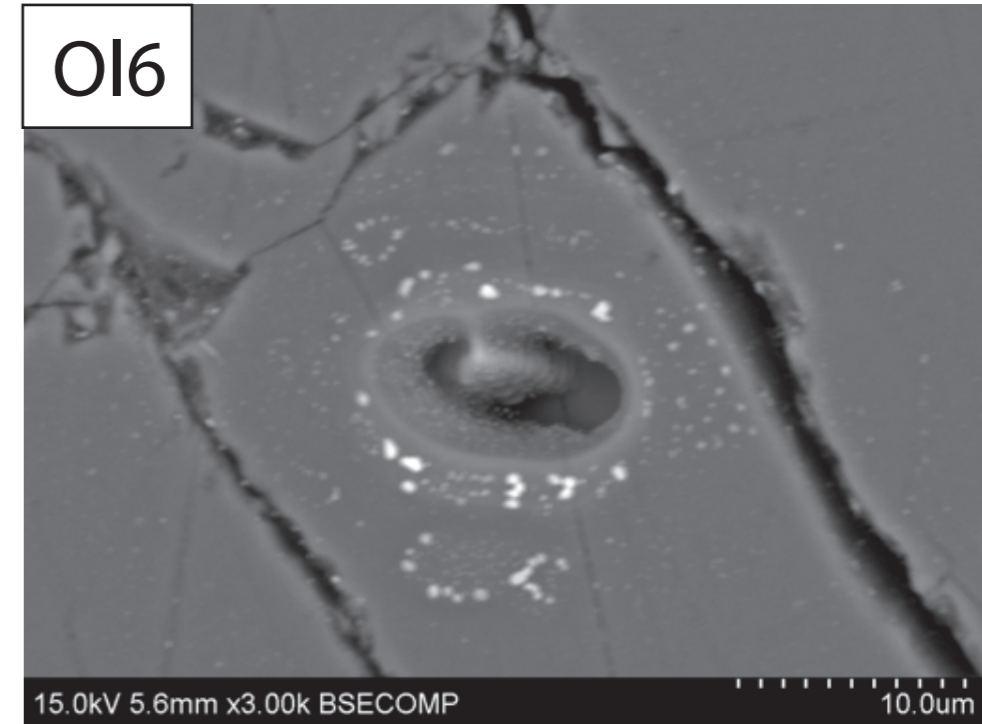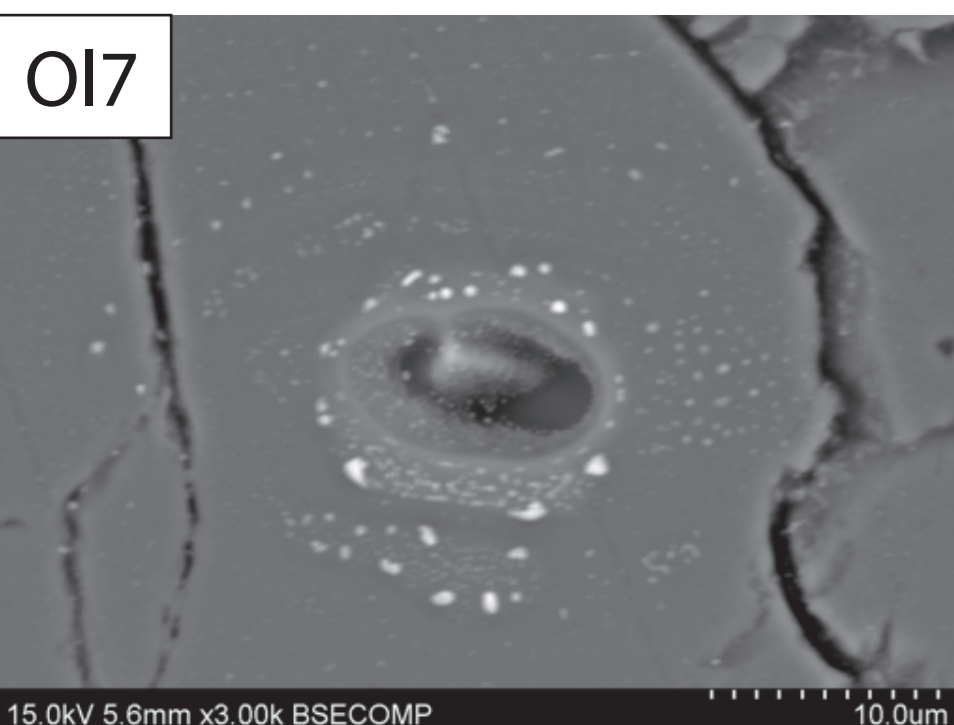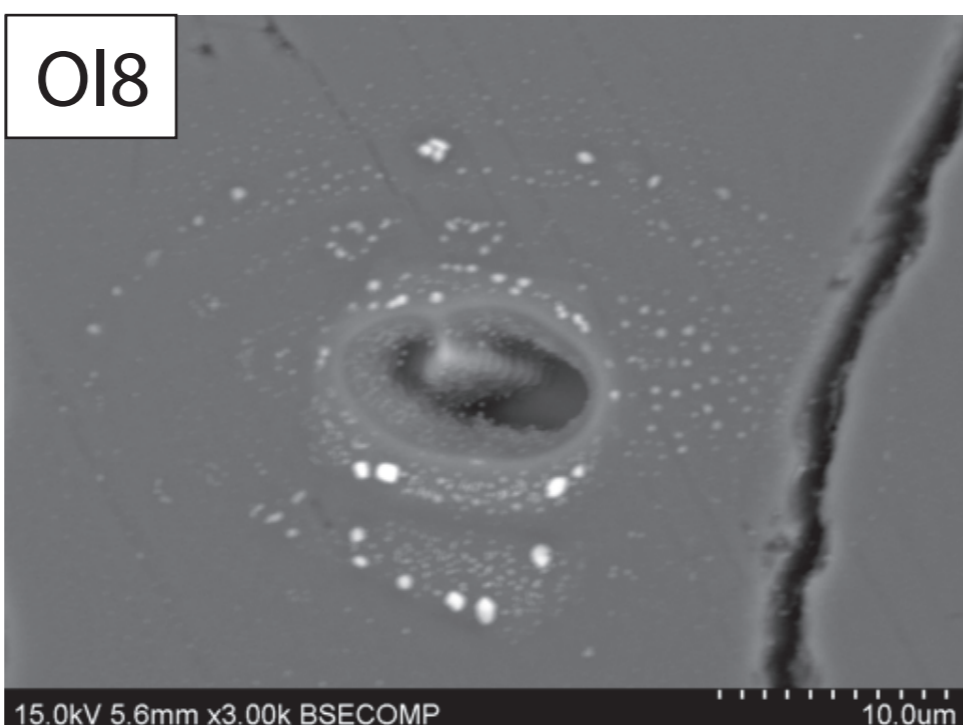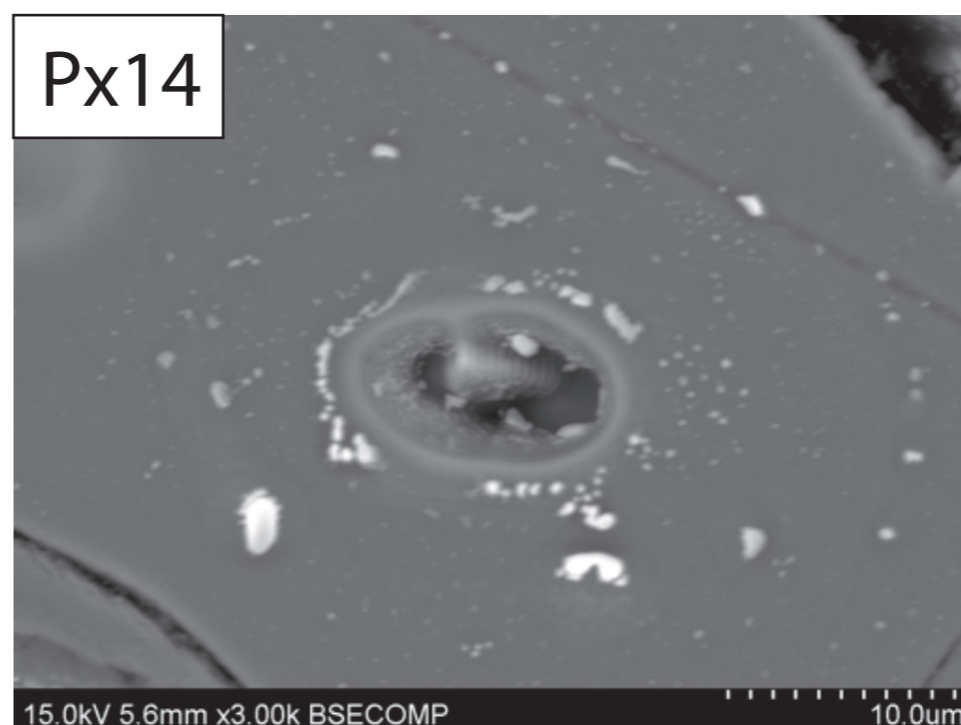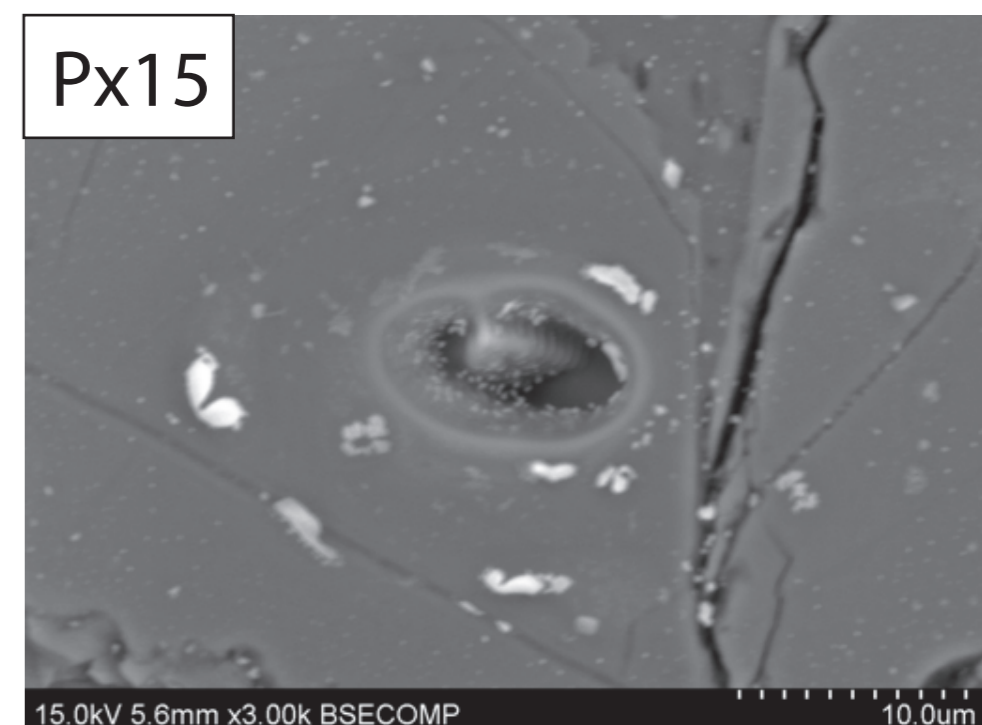

Ol-Px Al-Mg spots:

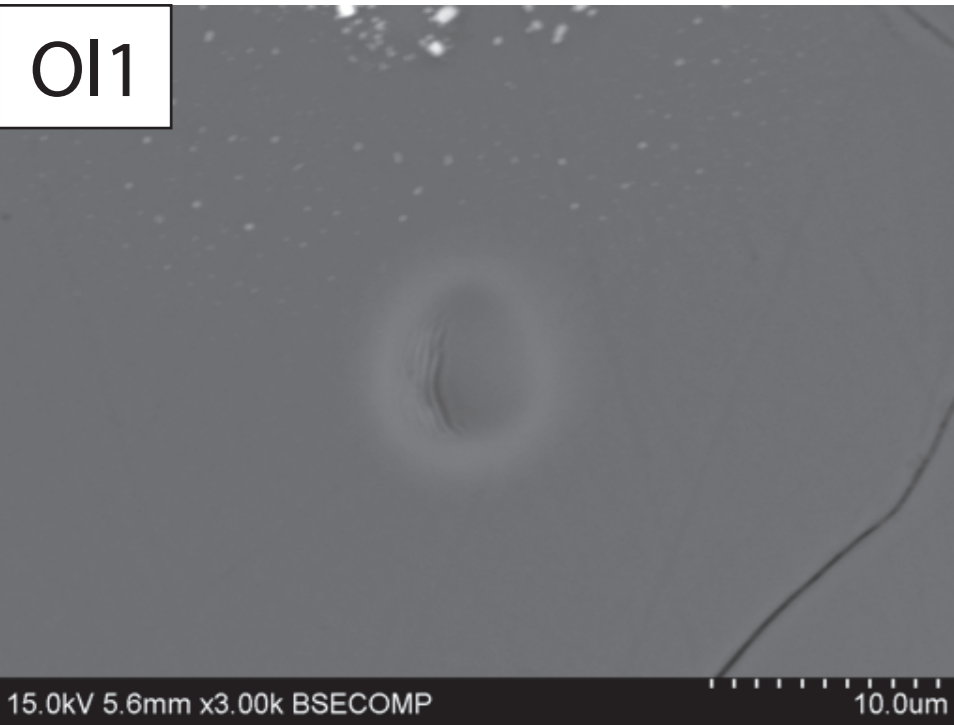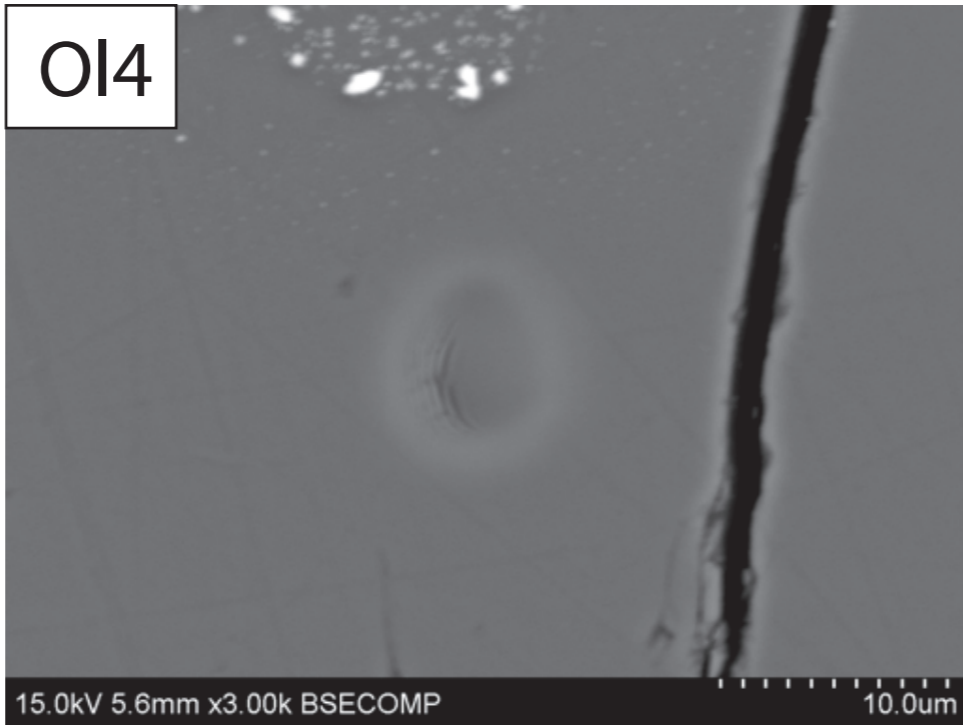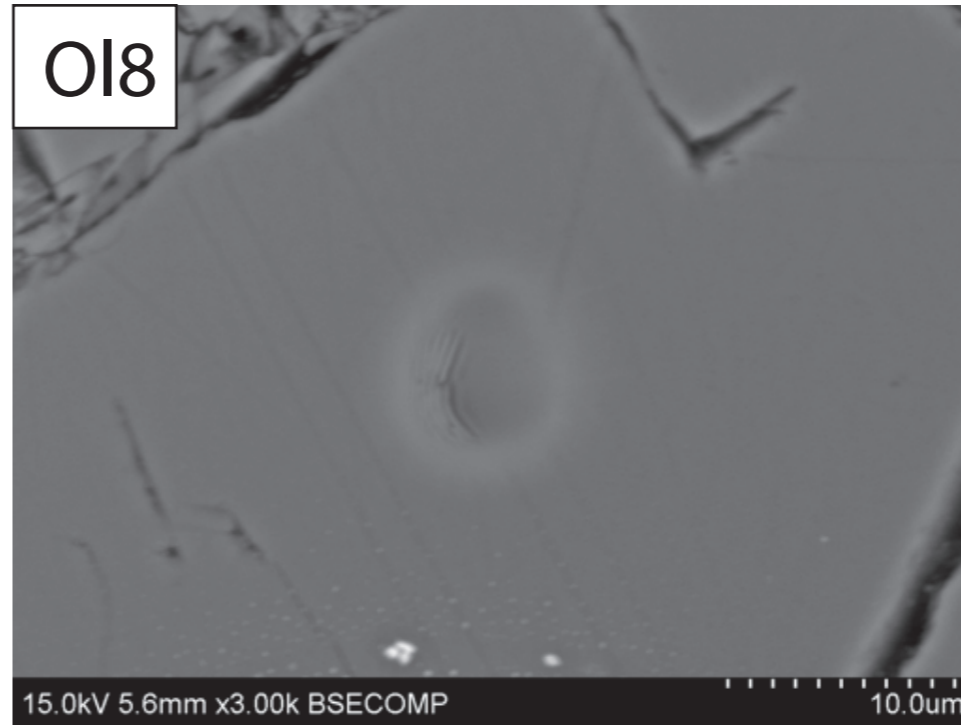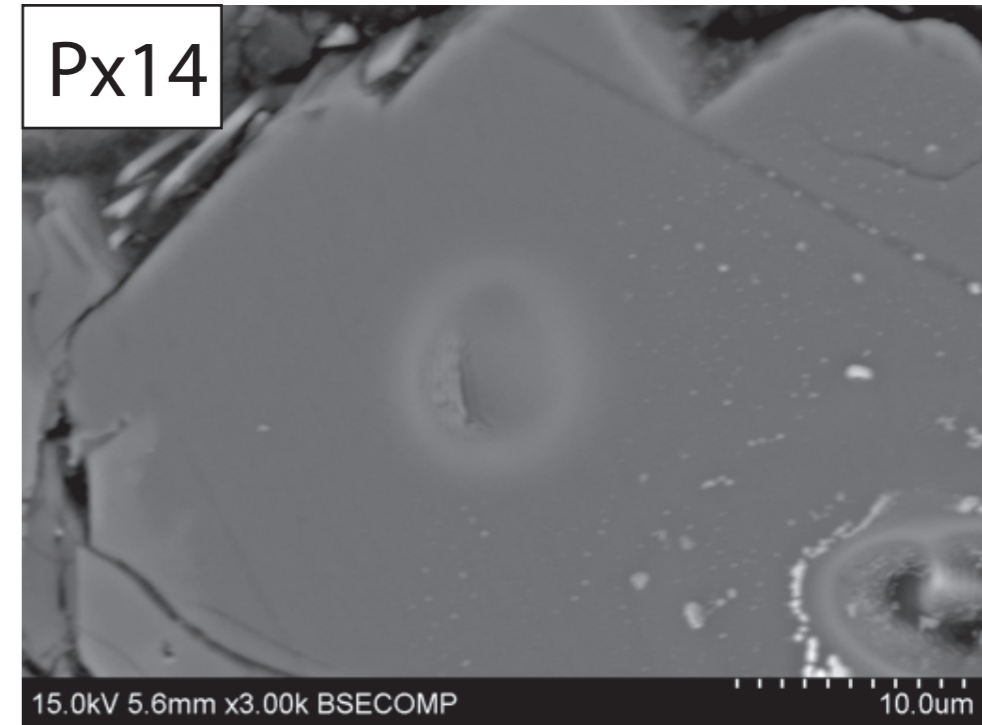

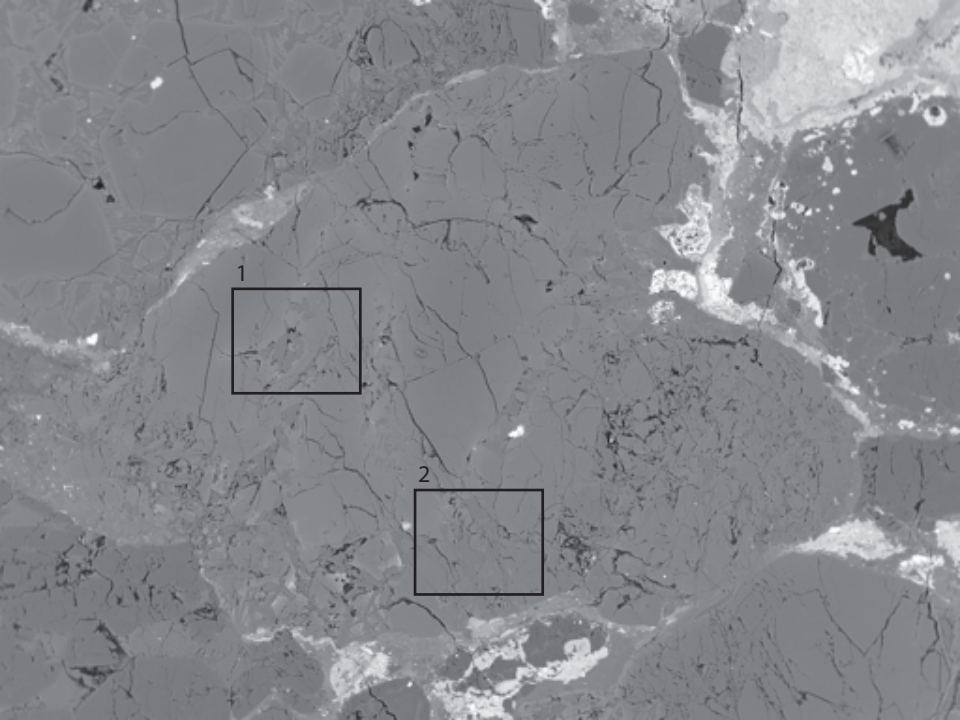

1

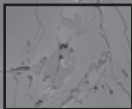

2

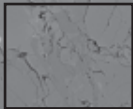



1

PI #1

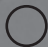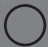

PI #2

50  $\mu\text{m}$

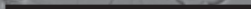

2

PI #7

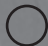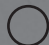

PI #6

PI #5

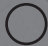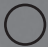

PI #4

50  $\mu$ m

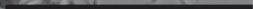

# An Al-Mg spots:

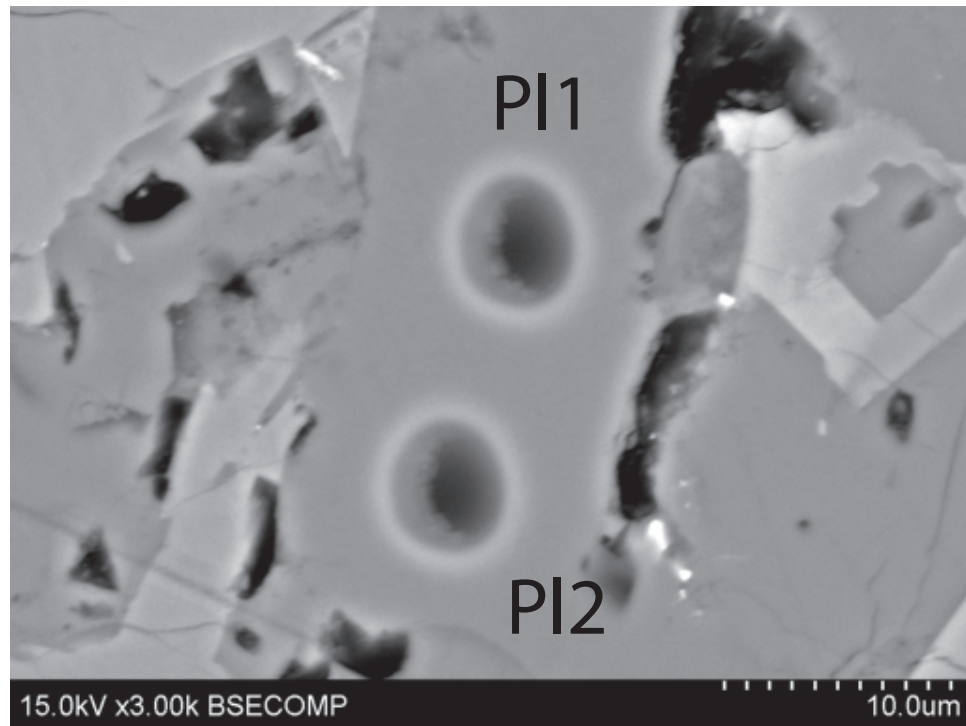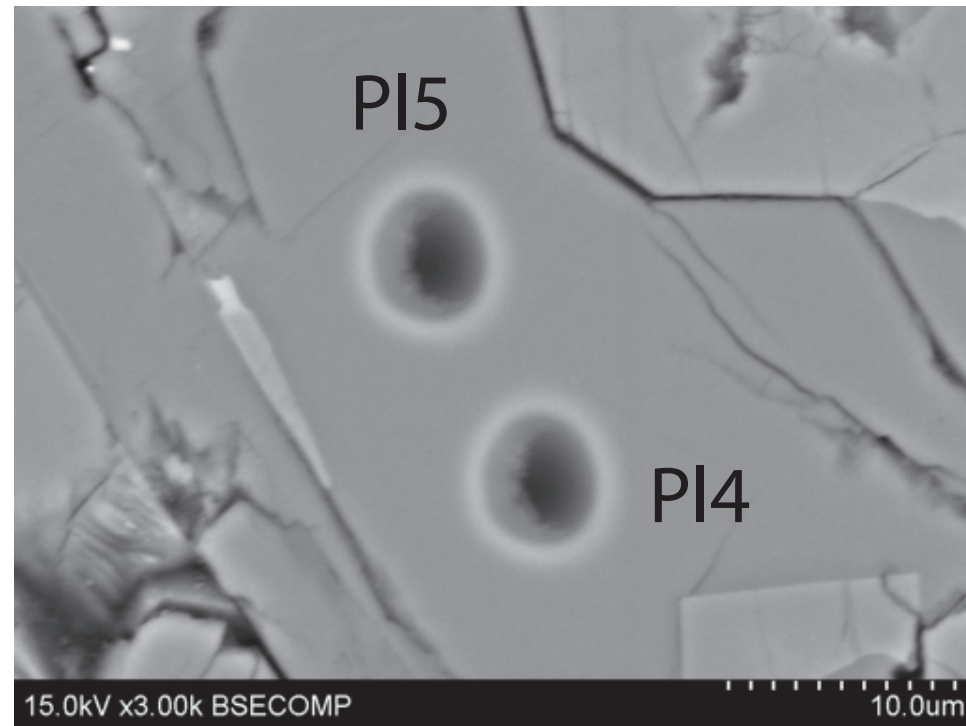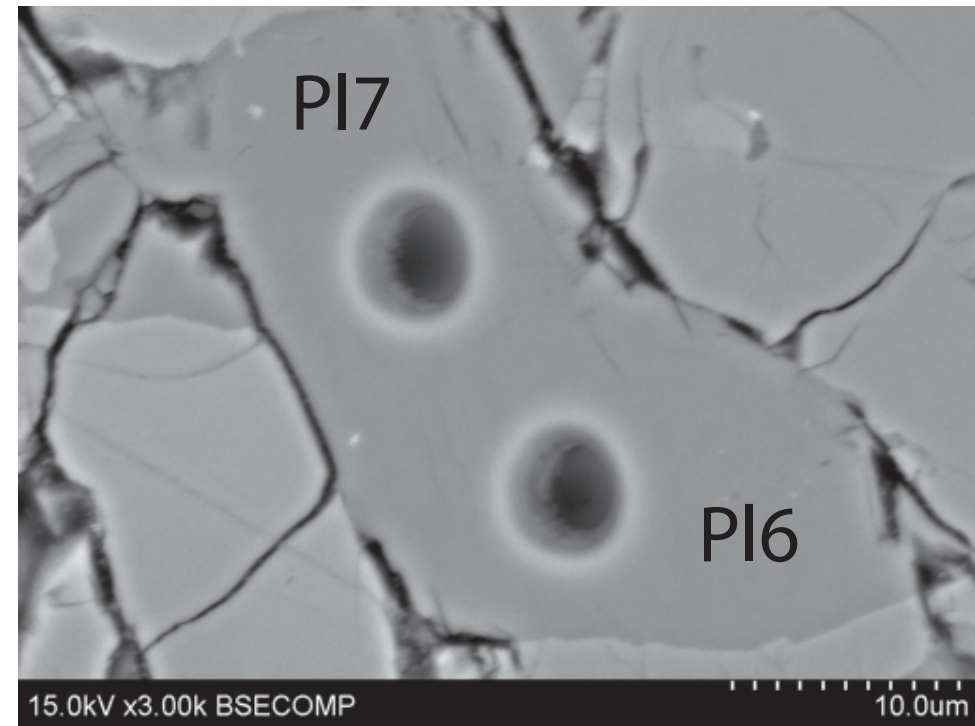

Supplement: NIHMS1757327-supplement-EA6-3.pdf [file NIHMS1757327-supplement-EA6-3.pdf]
