# Supplementary material
Source: PubMed Central journal article supplement (PMC8740609)

Electronic Annex EA 6-4: Location of SIMS analyses for QUE 97008 c150  
New constraints from  $^{26}\text{Al}$ - $^{26}\text{Mg}$  chronology of anorthite  
bearing chondrules in unequilibrated ordinary chondrites  
*Guillaume Siron, Kohei Fukuda, Makoto Kimura, and Noriko T. Kita*

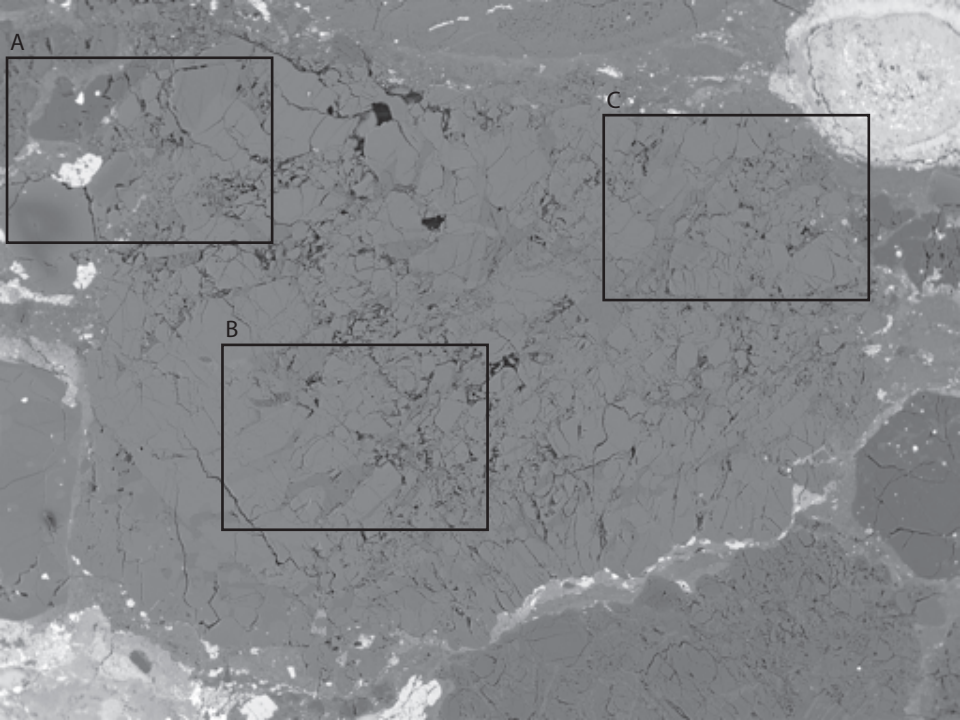

A

C

B

A

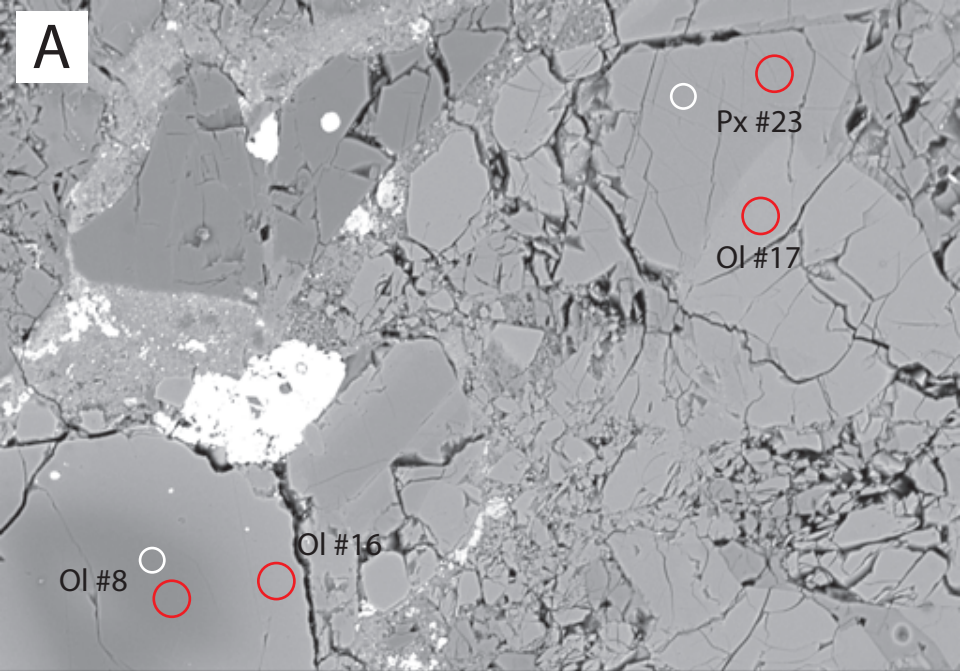

Px #23

Ol #17

Ol #8

Ol #16

**B**

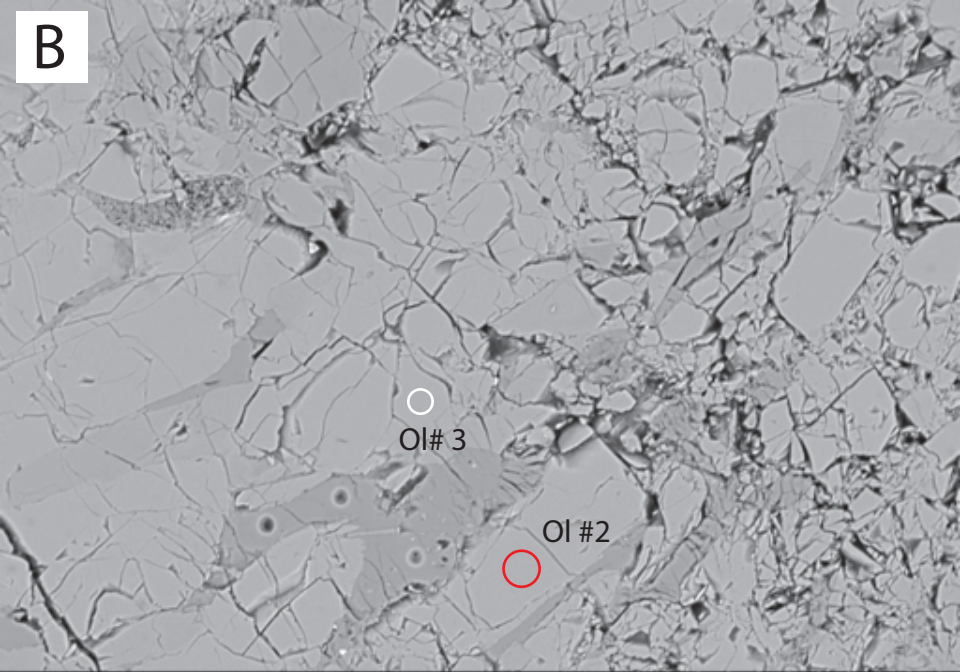

OI# 3

OI# 2

C

Ol #28

Px #27

Ol #29

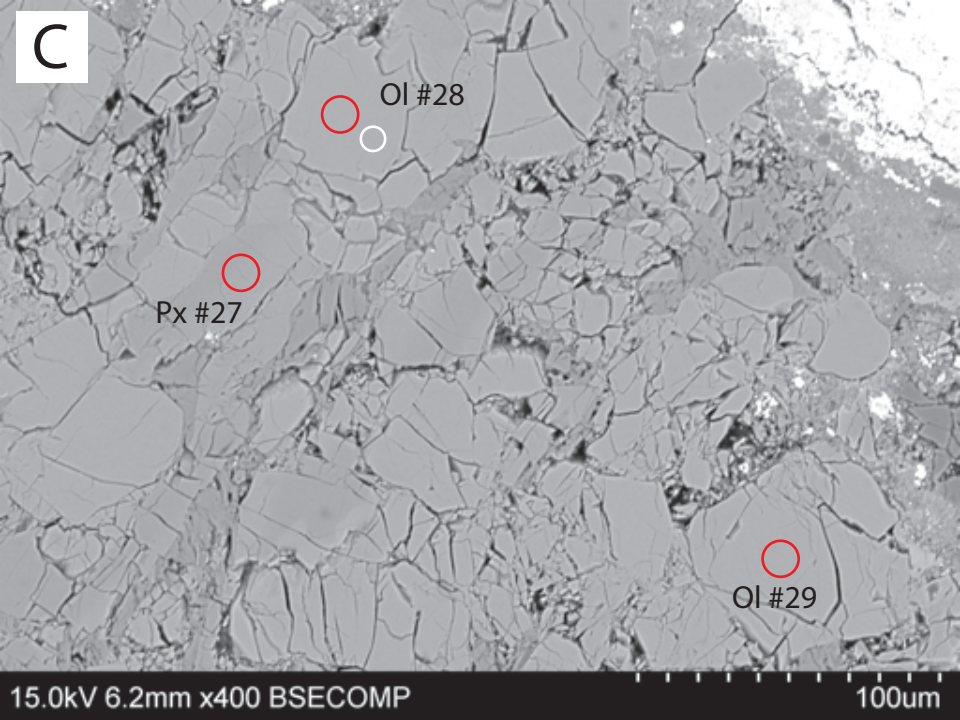

# Ol-Px oxygen spots:

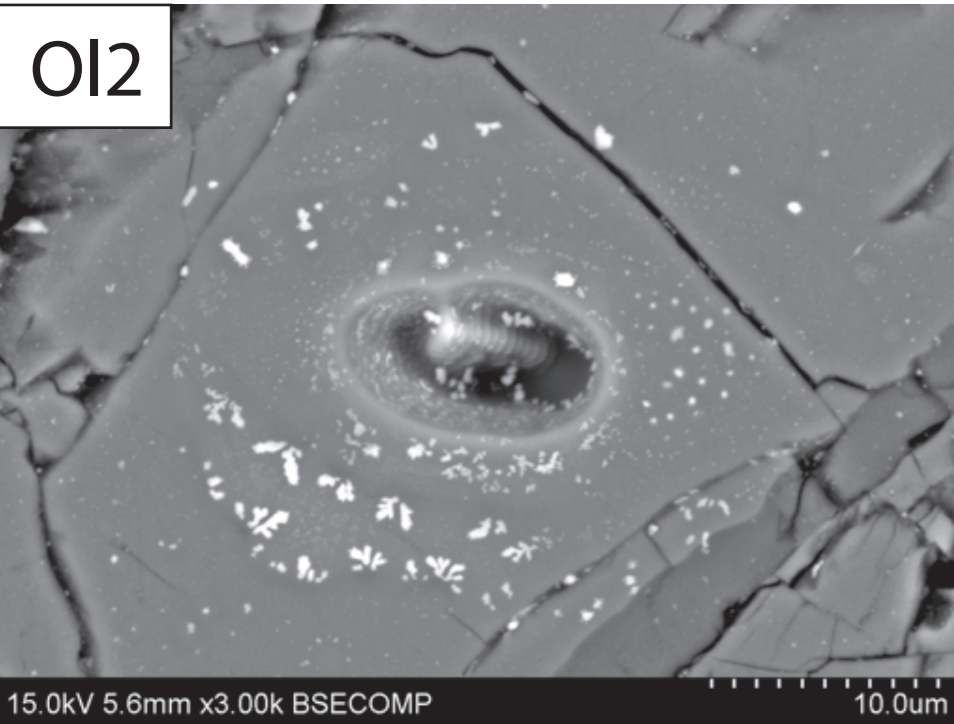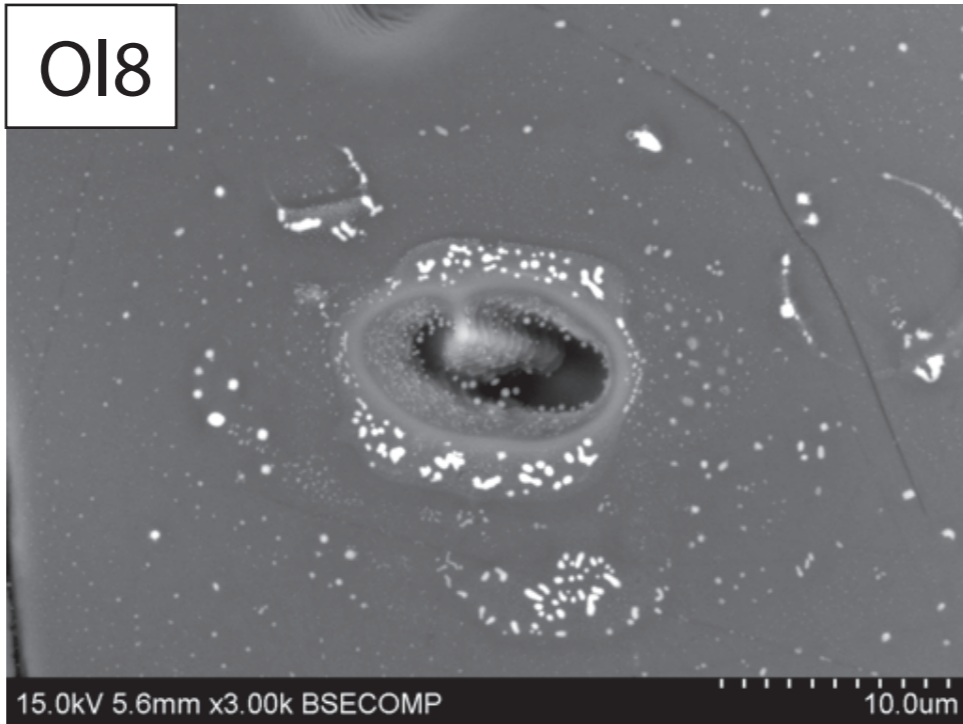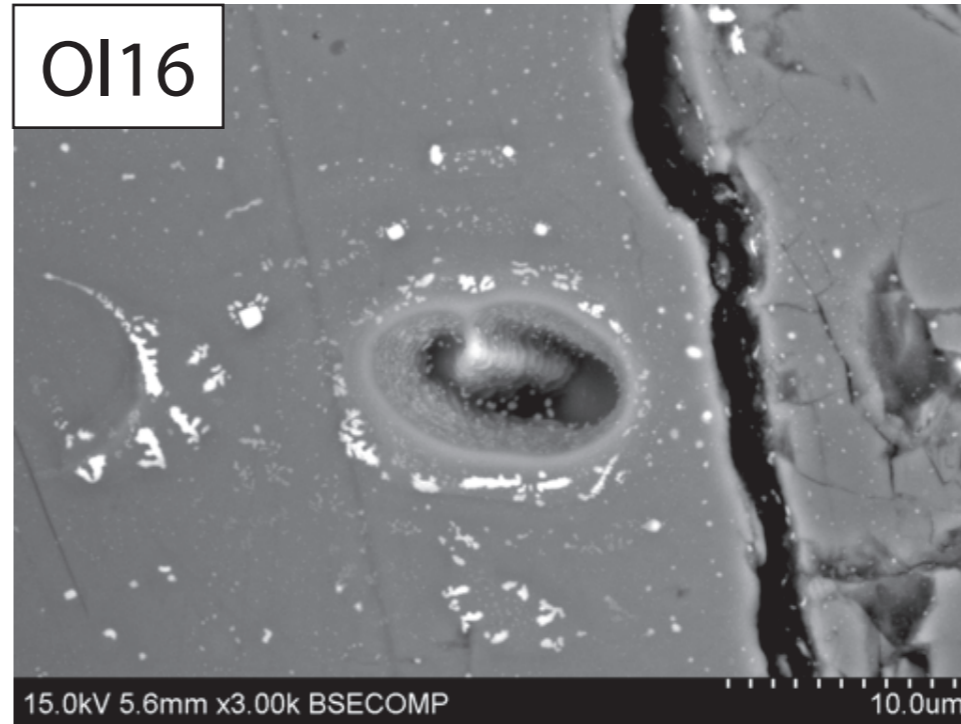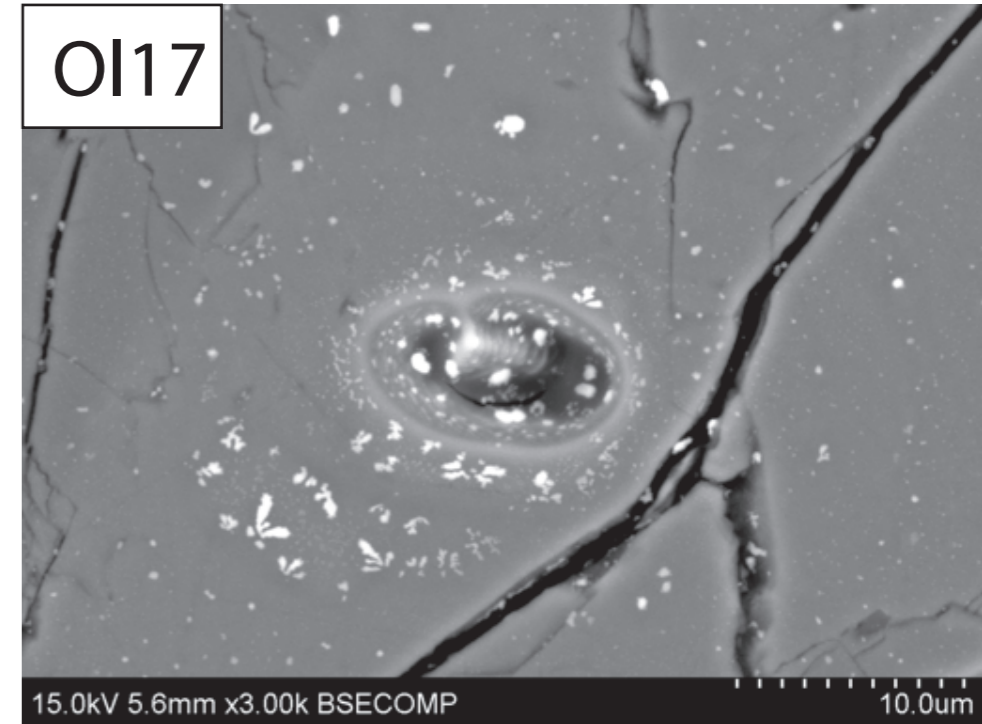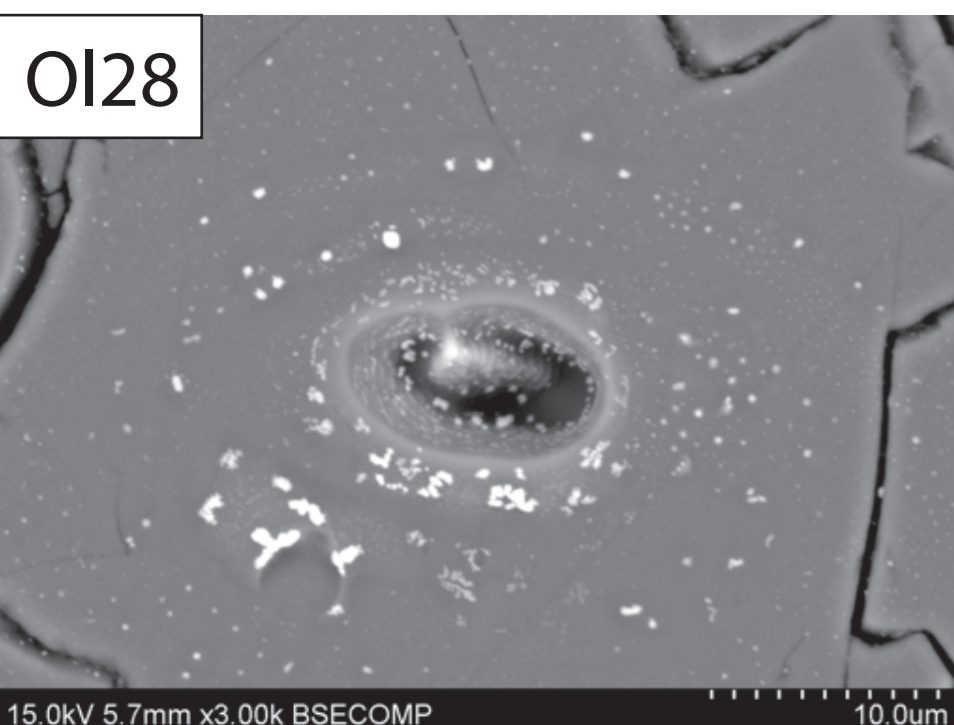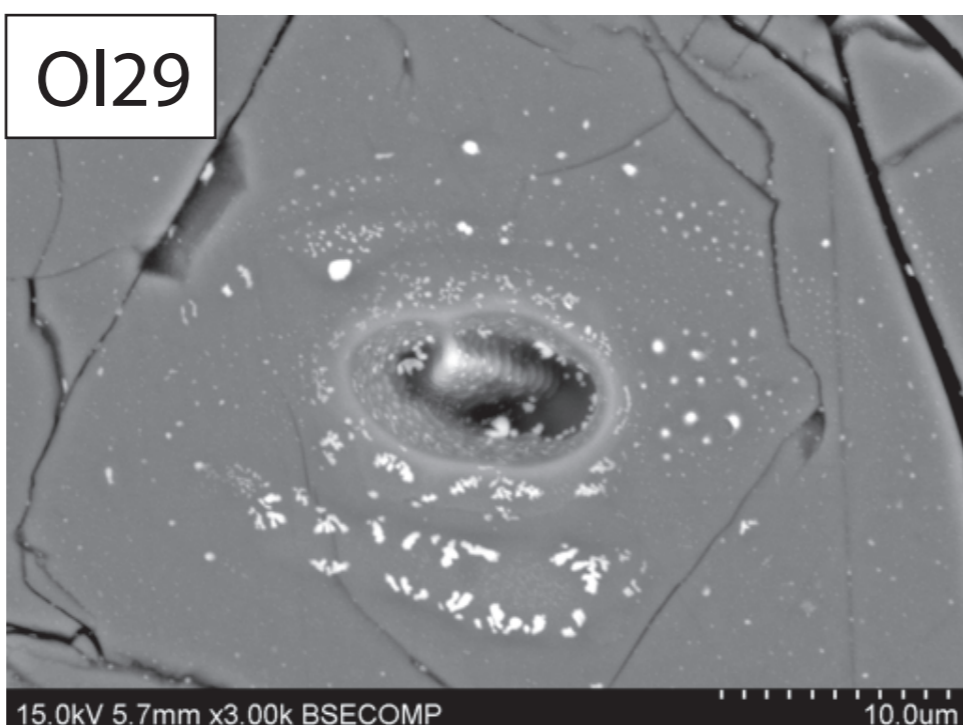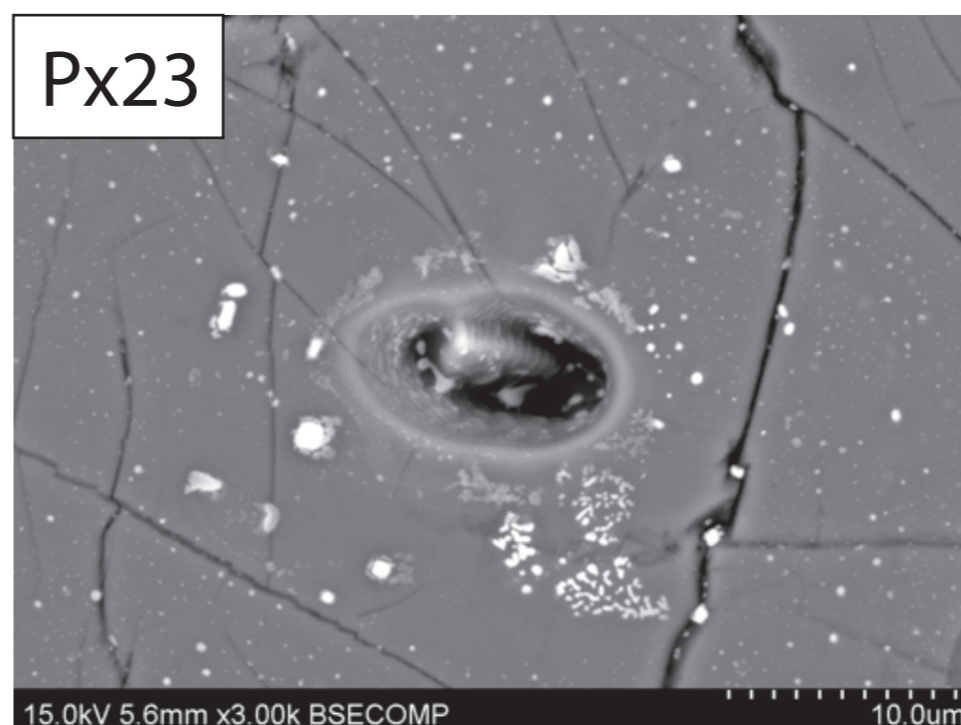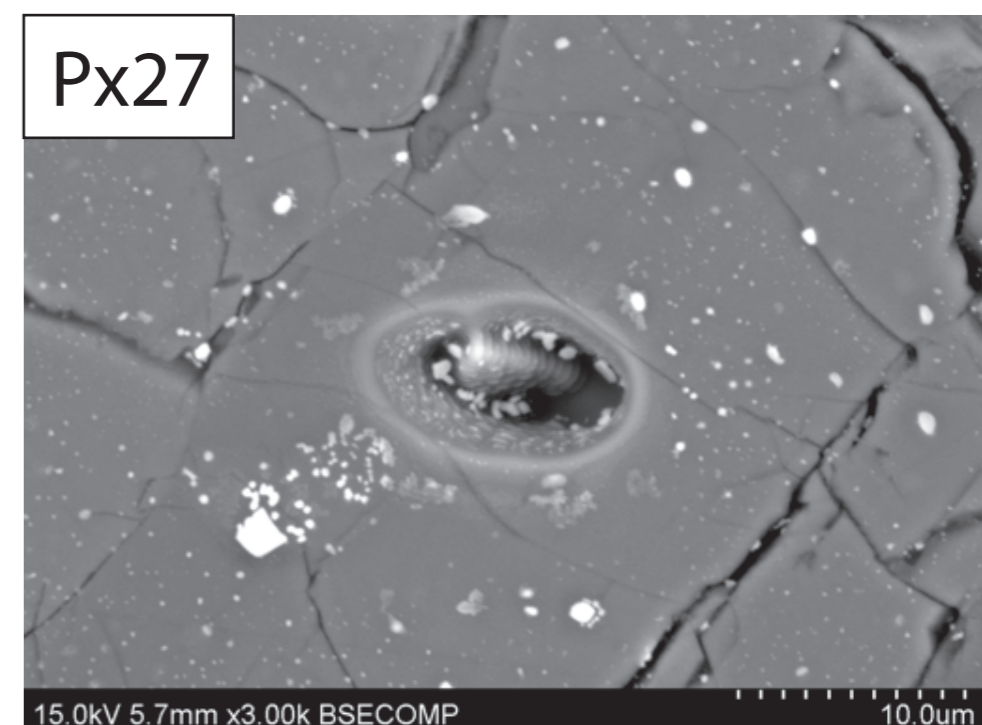

# Ol-Px Al-Mg spots:

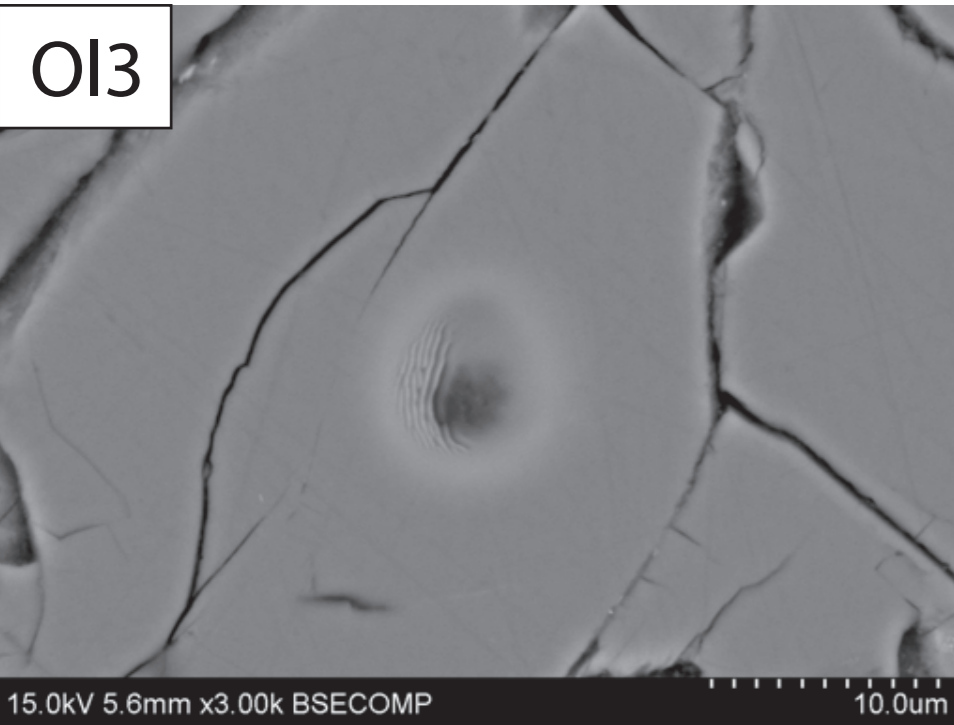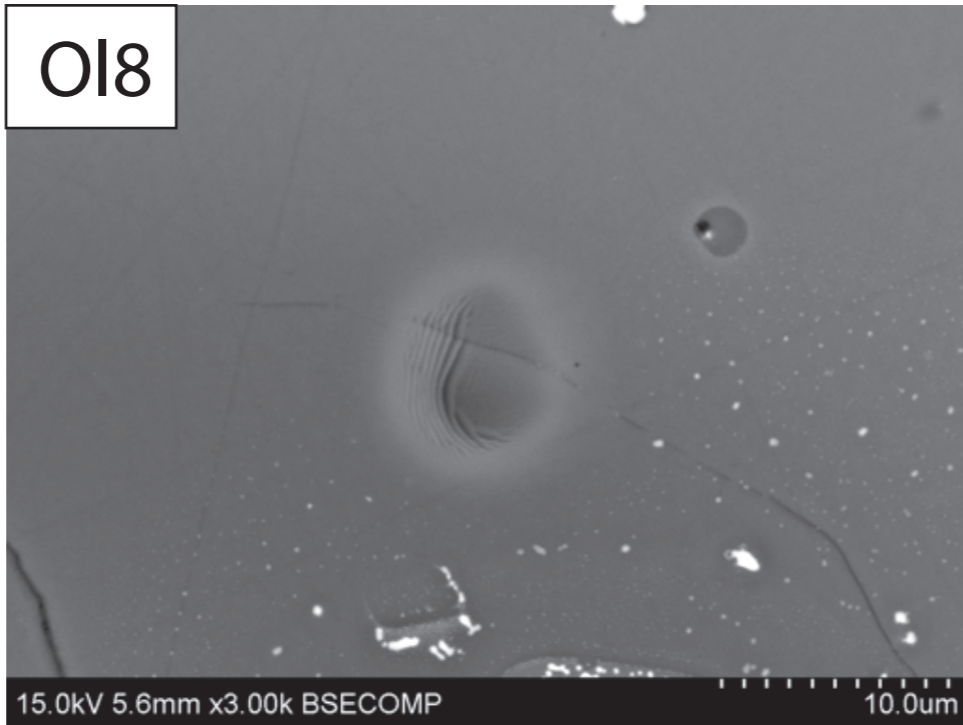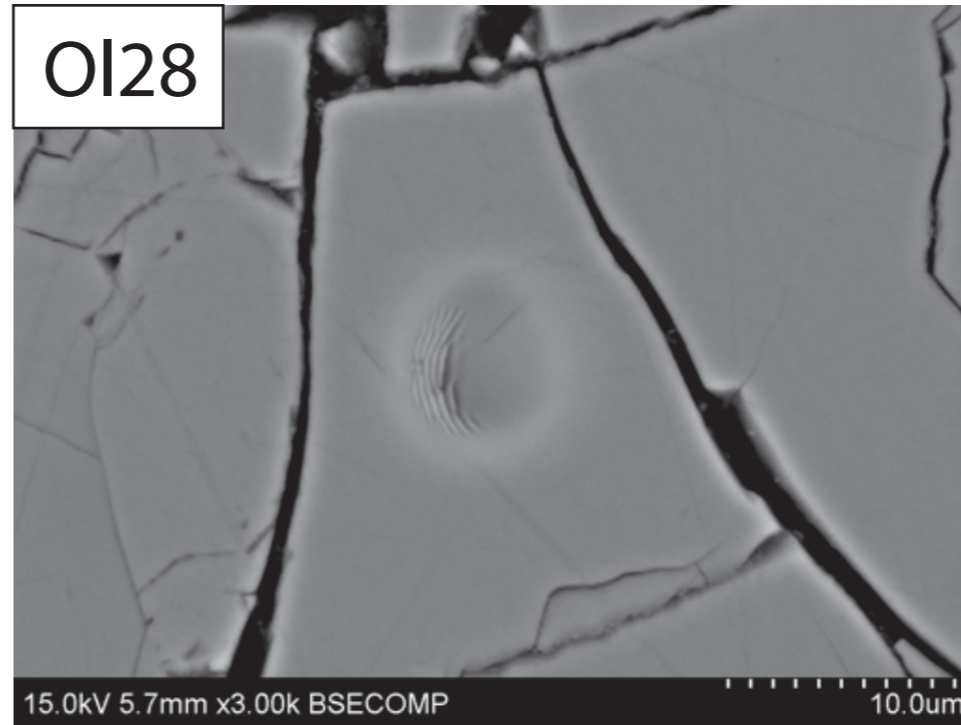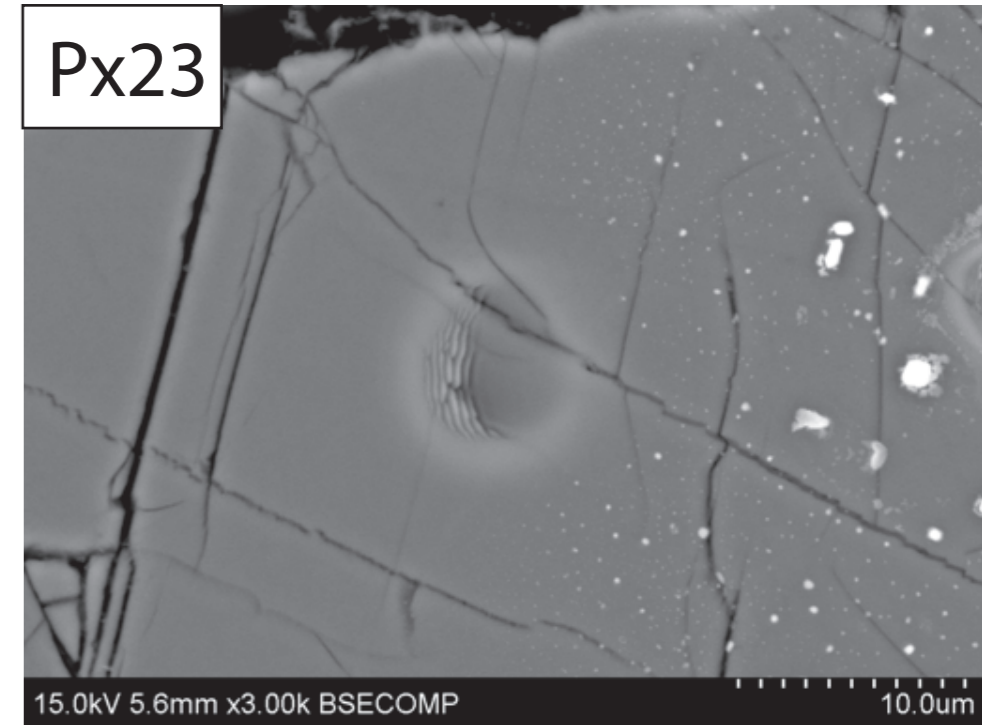

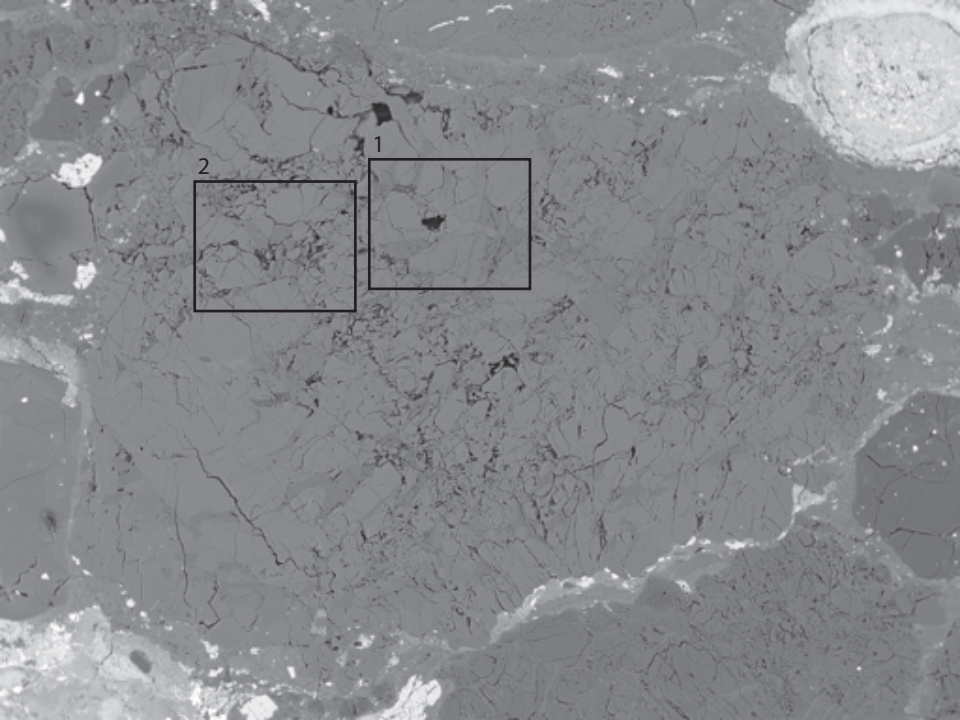

1

2

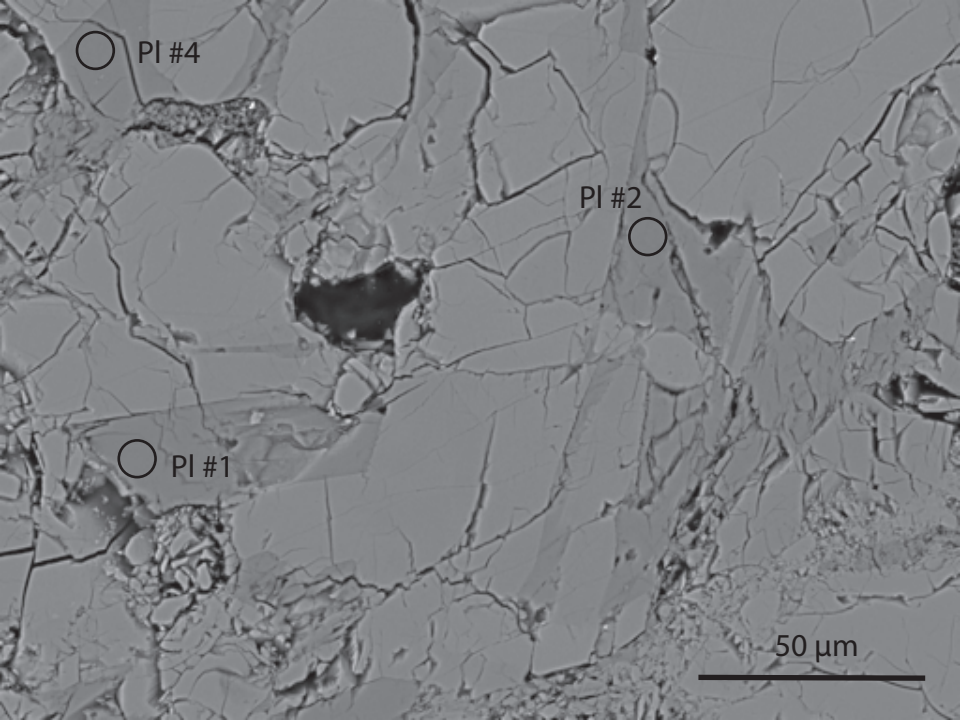

○ PI #4

PI #2

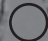

○ PI #1

50  $\mu\text{m}$



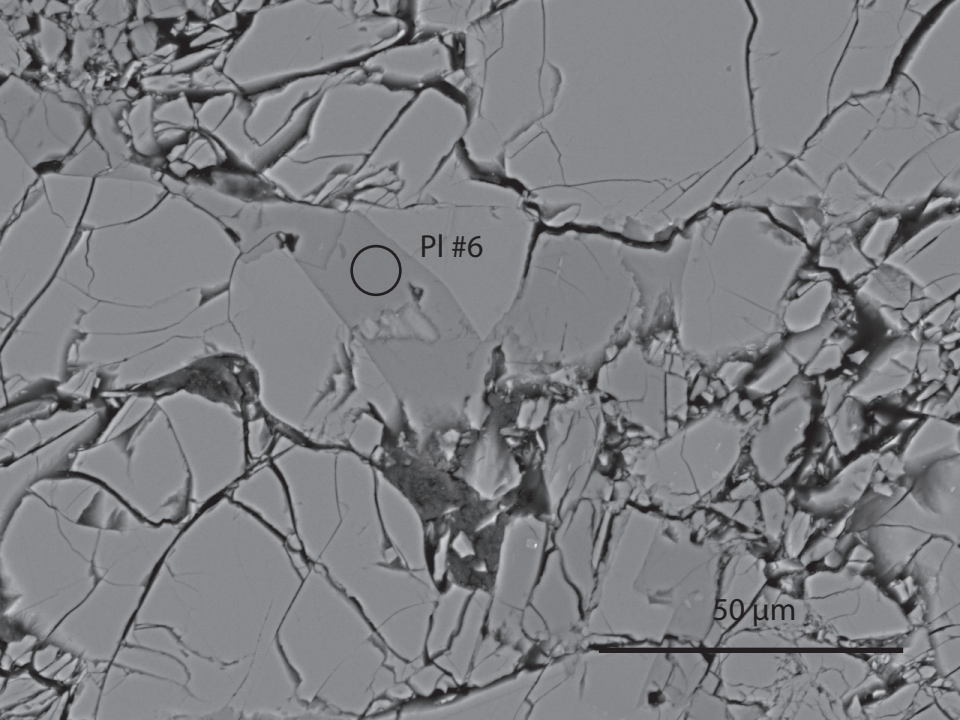

PI #6

50 μm

# An Al-Mg spots:

PI1

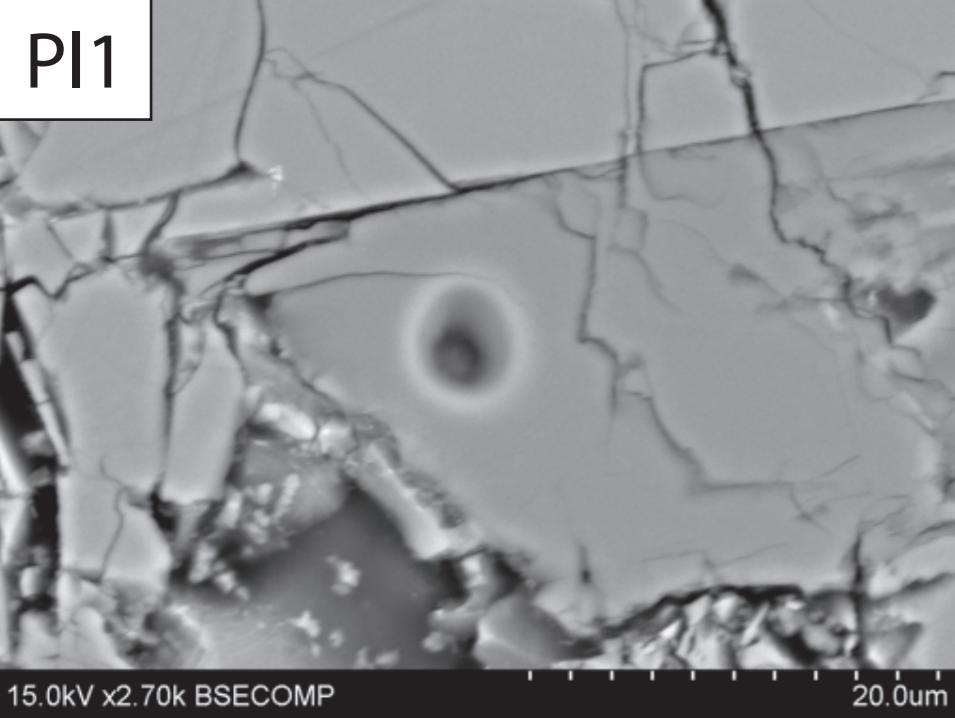

PI2

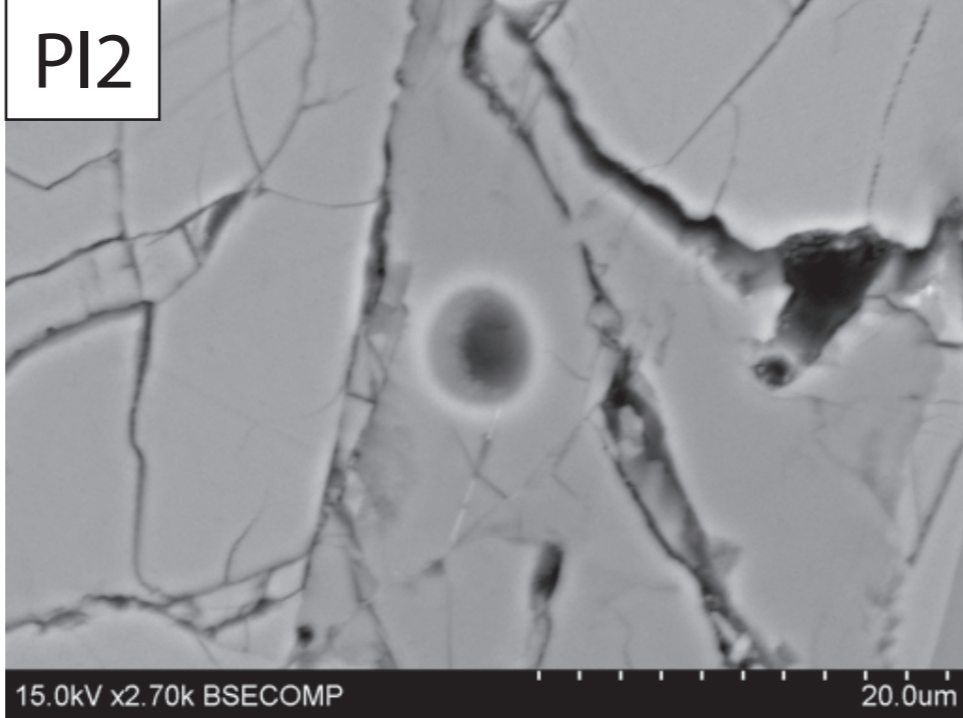

PI4

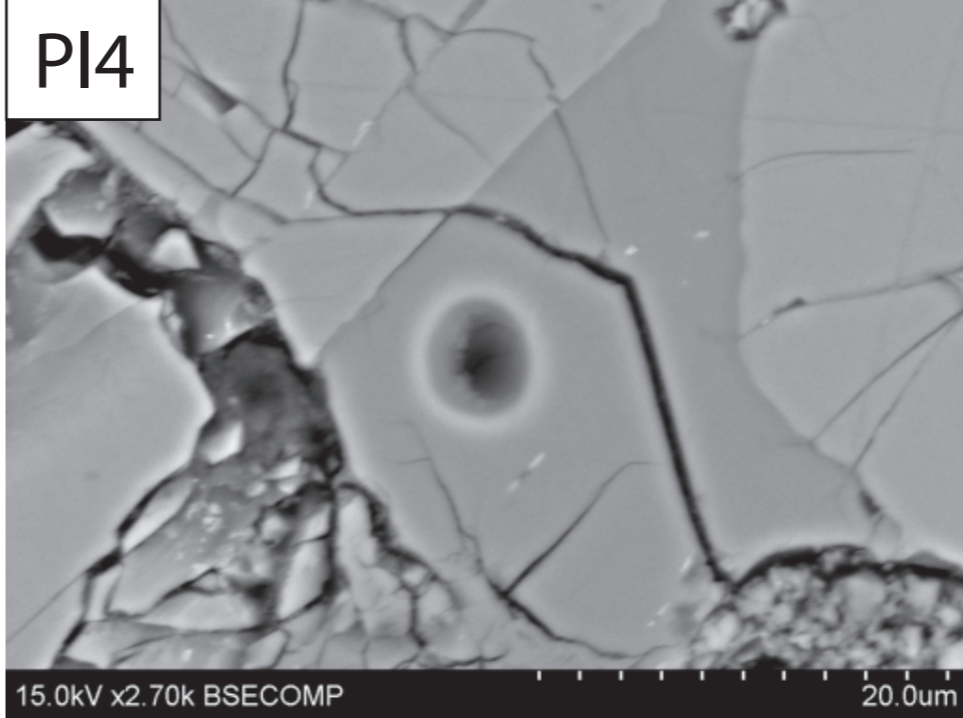

PI6

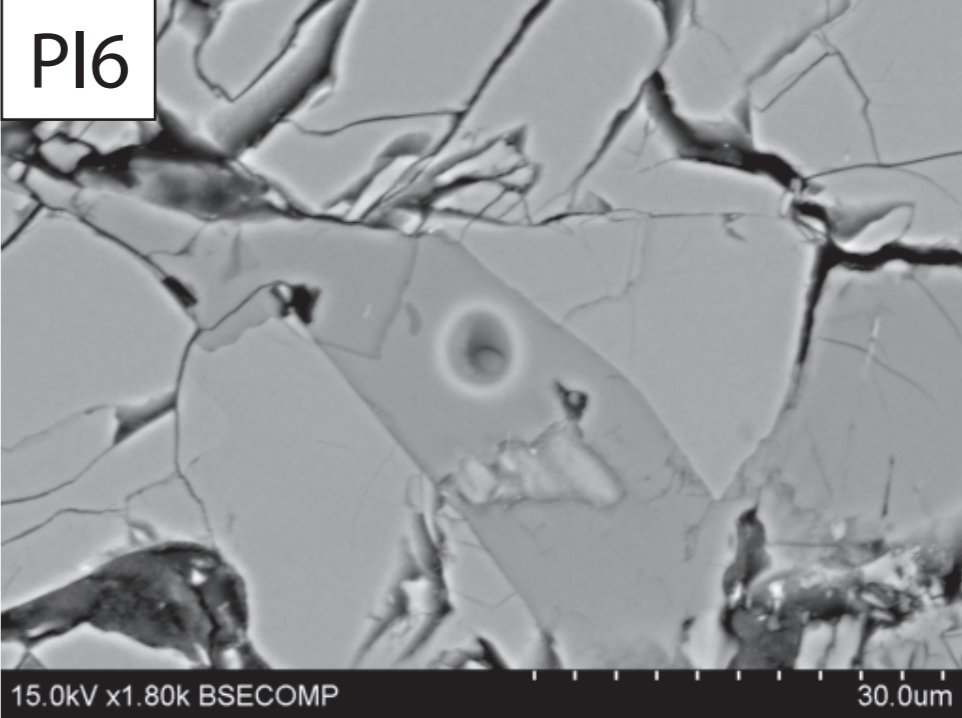

Supplement: NIHMS1757327-supplement-EA6-4.pdf [file NIHMS1757327-supplement-EA6-4.pdf]
