# Supplementary material
Source: PubMed Central journal article supplement (PMC8740609)

Electronic Annex EA 6-5: Location of SIMS analyses for NWA 8649 c17  
New constraints from  $^{26}\text{Al}$ - $^{26}\text{Mg}$  chronology of anorthite  
bearing chondrules in unequilibrated ordinary chondrites  
*Guillaume Siron, Kohei Fukuda, Makoto Kimura, and Noriko T. Kita*

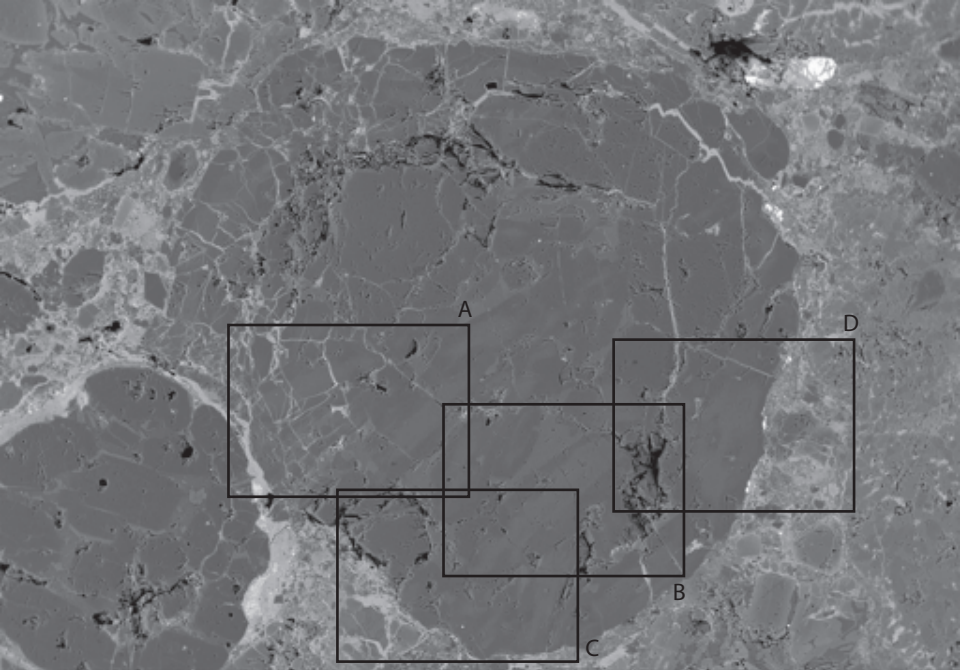

A

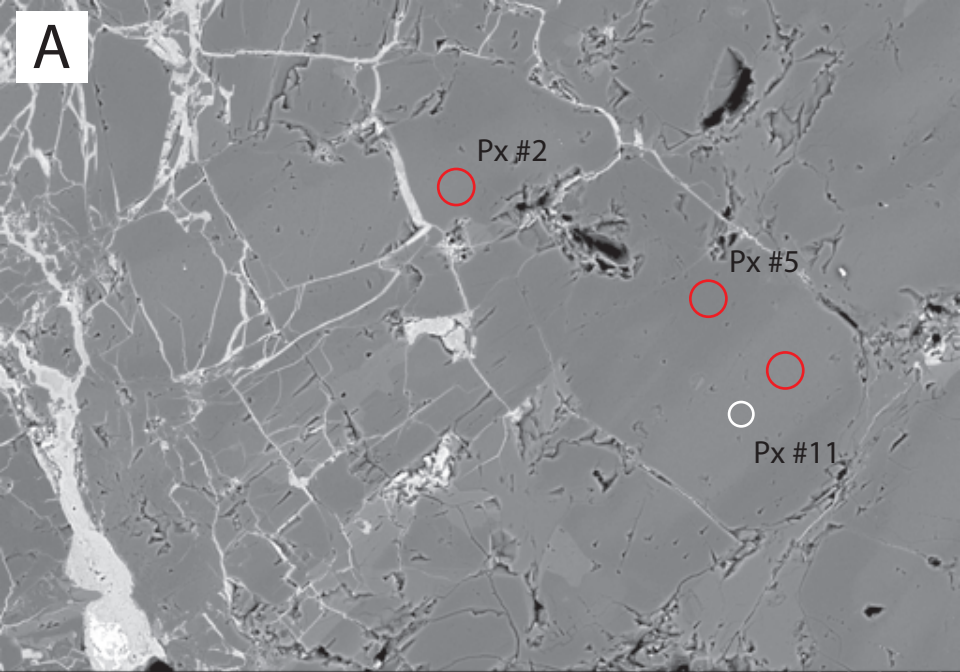

Px #2

Px #5

Px #11

**B**

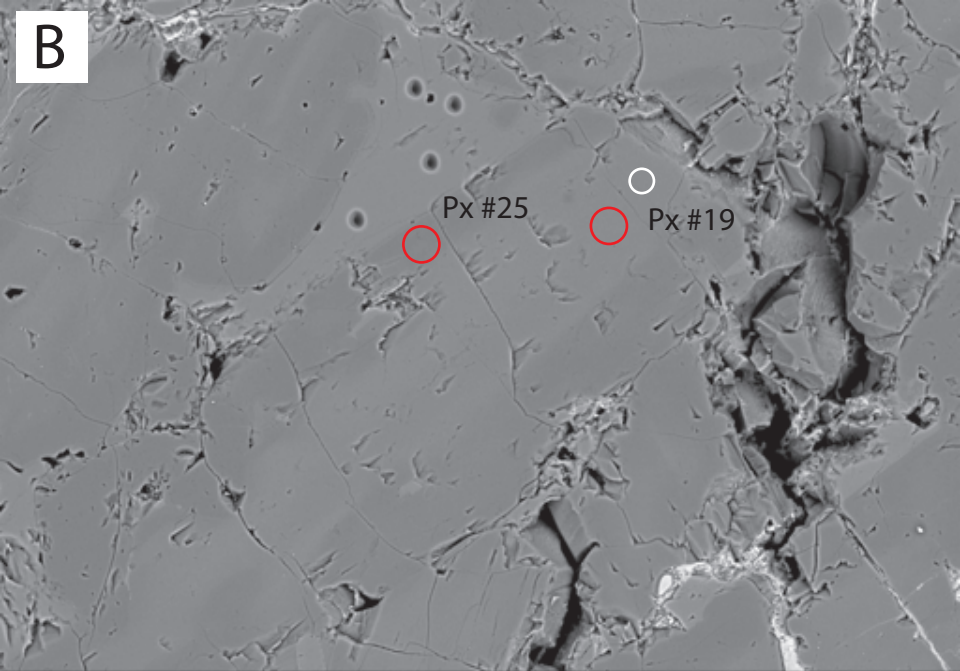

Px #25

Px #19

C

Px #17

15.0kV 5.9mm x400 BSECOMP

100um

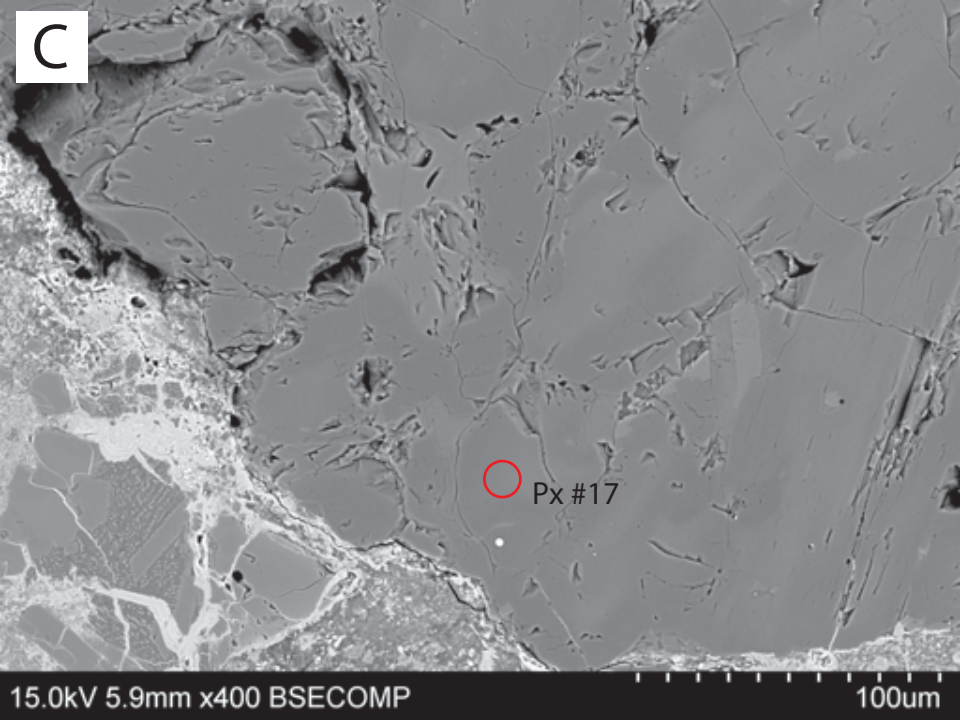

D

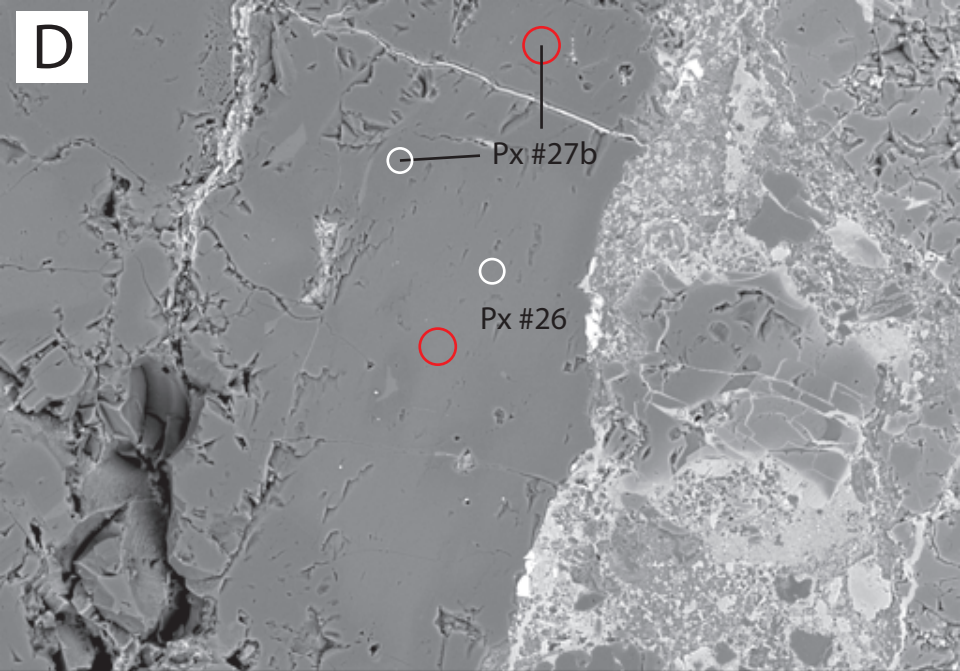

Px #27b

Px #26

# Ol-Px oxygen spots:

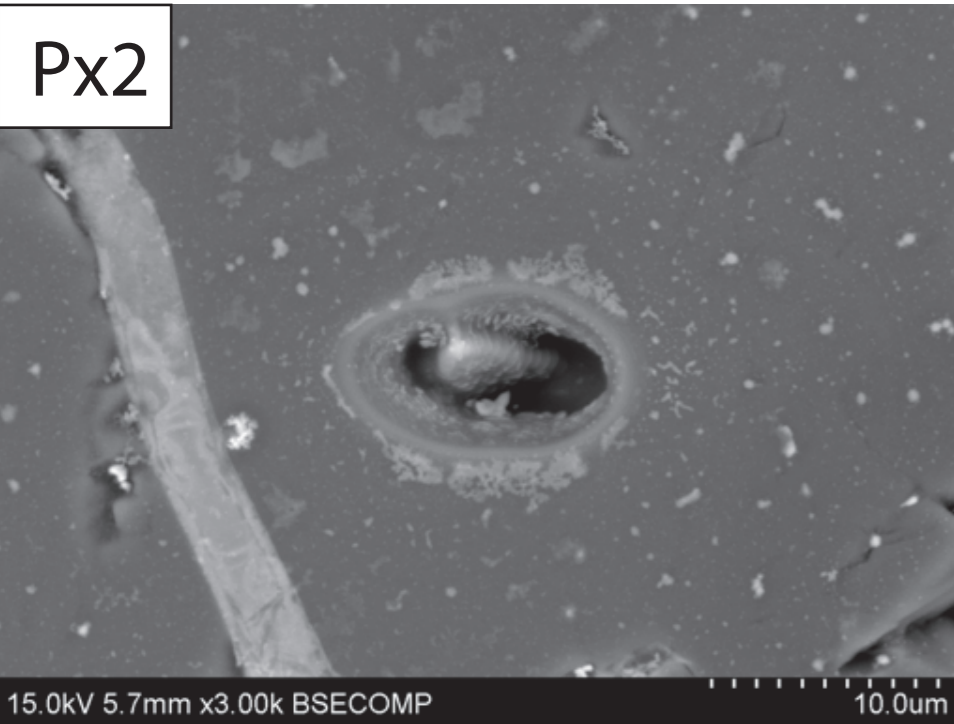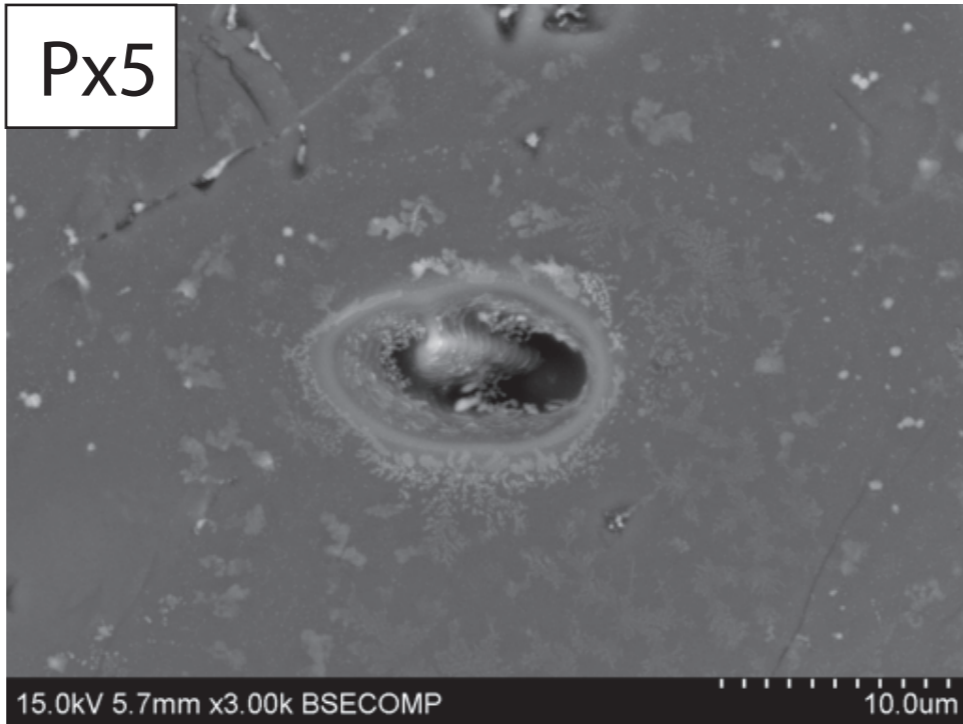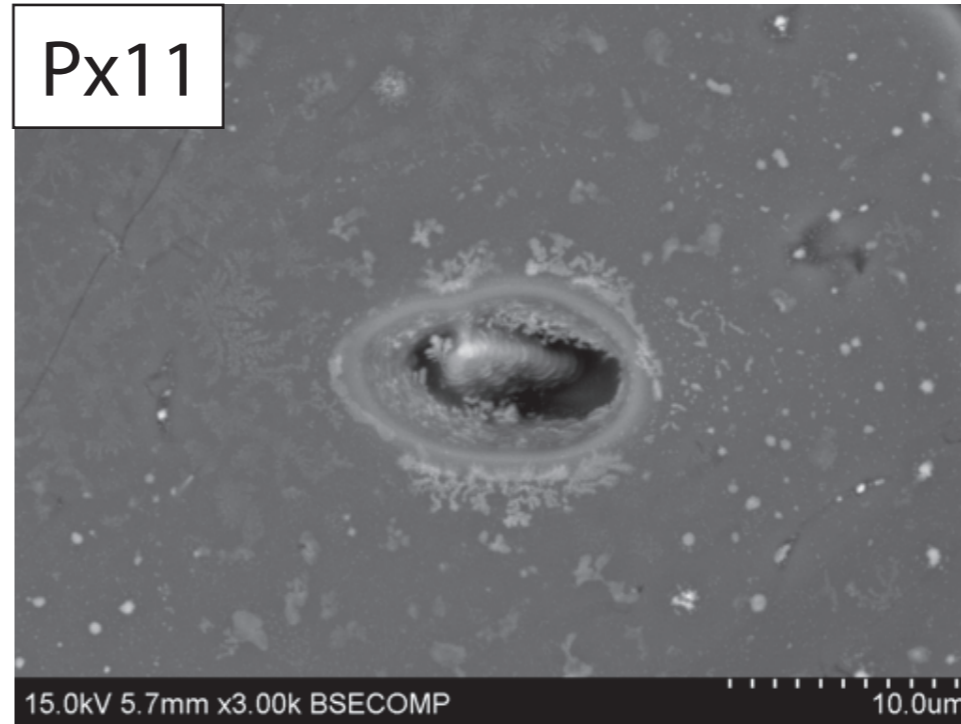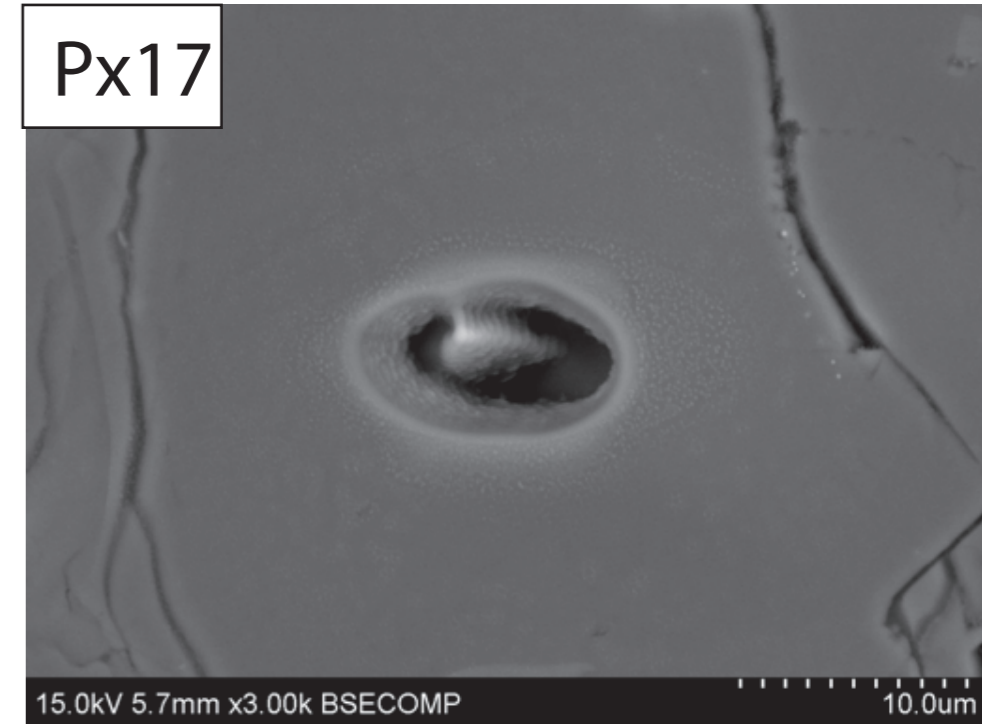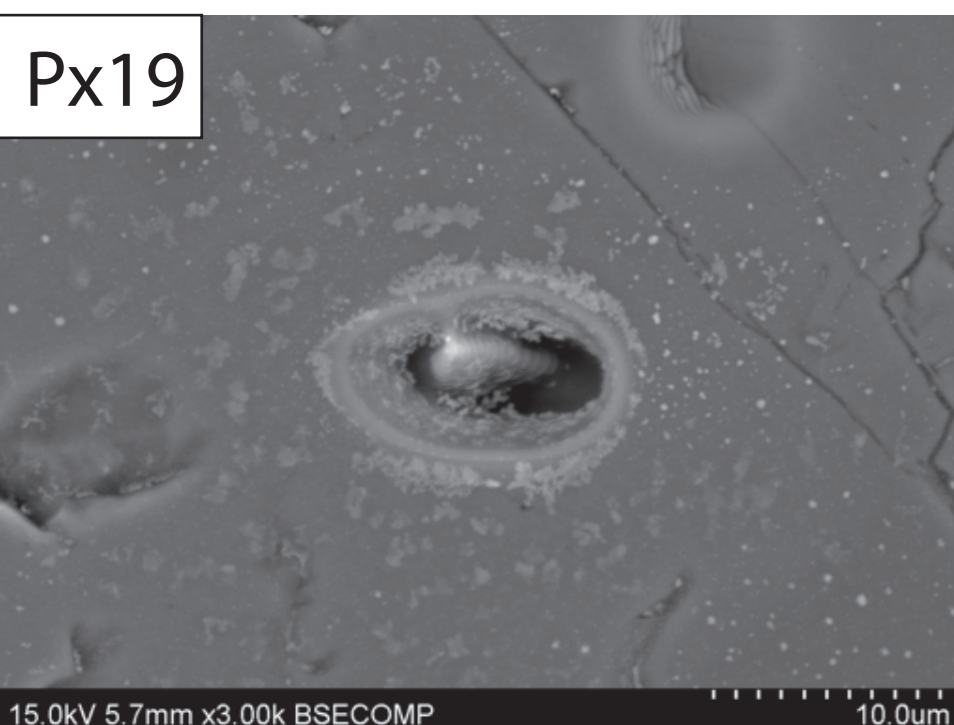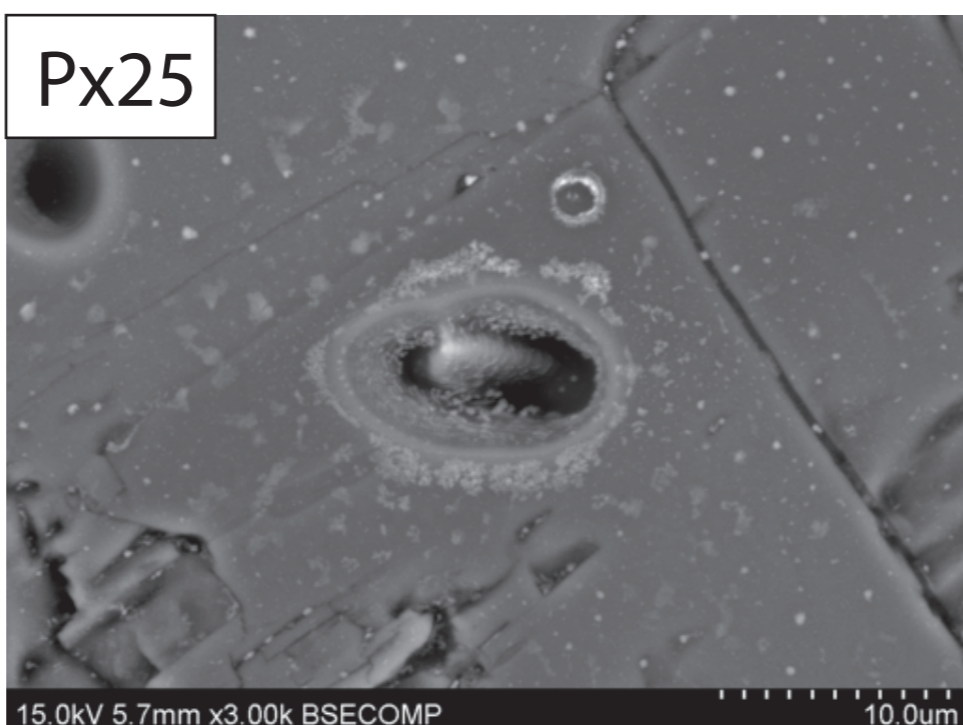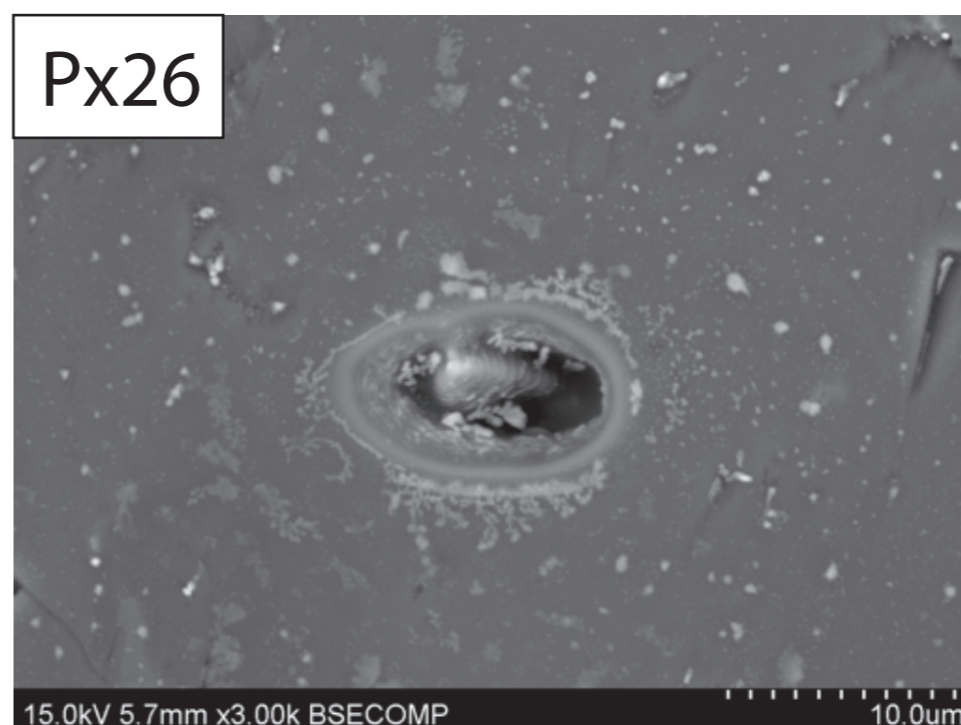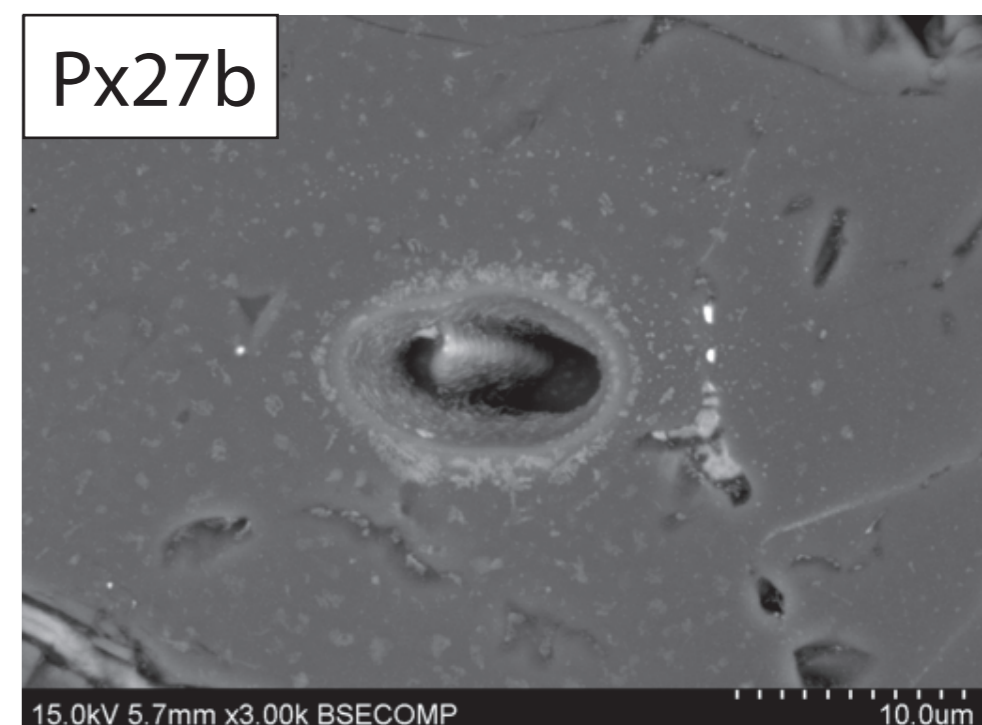

# Ol-Px Al-Mg spots:

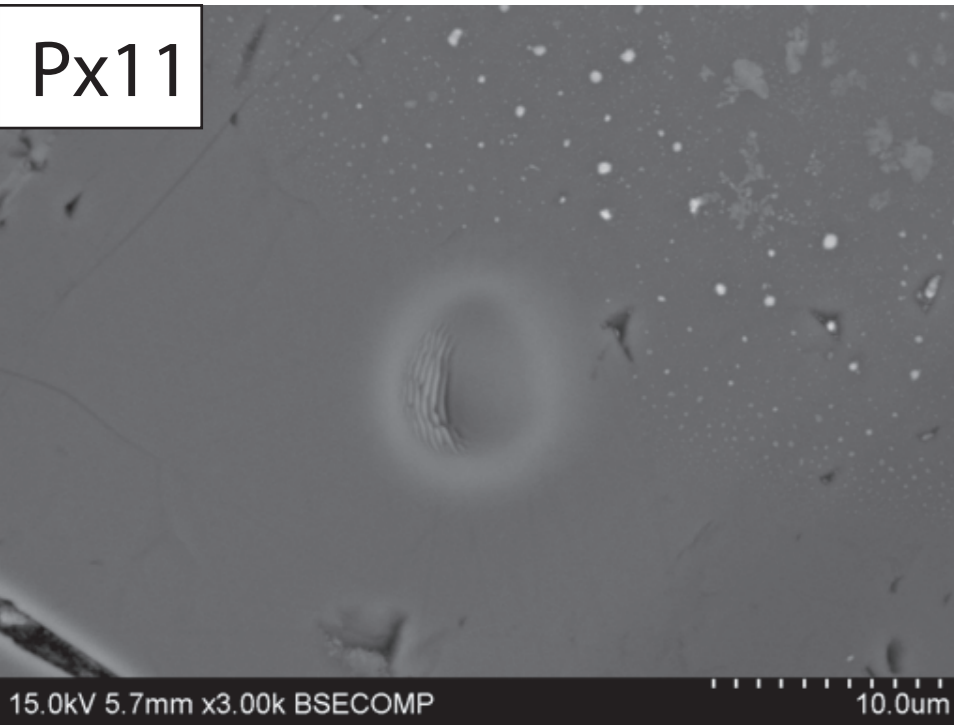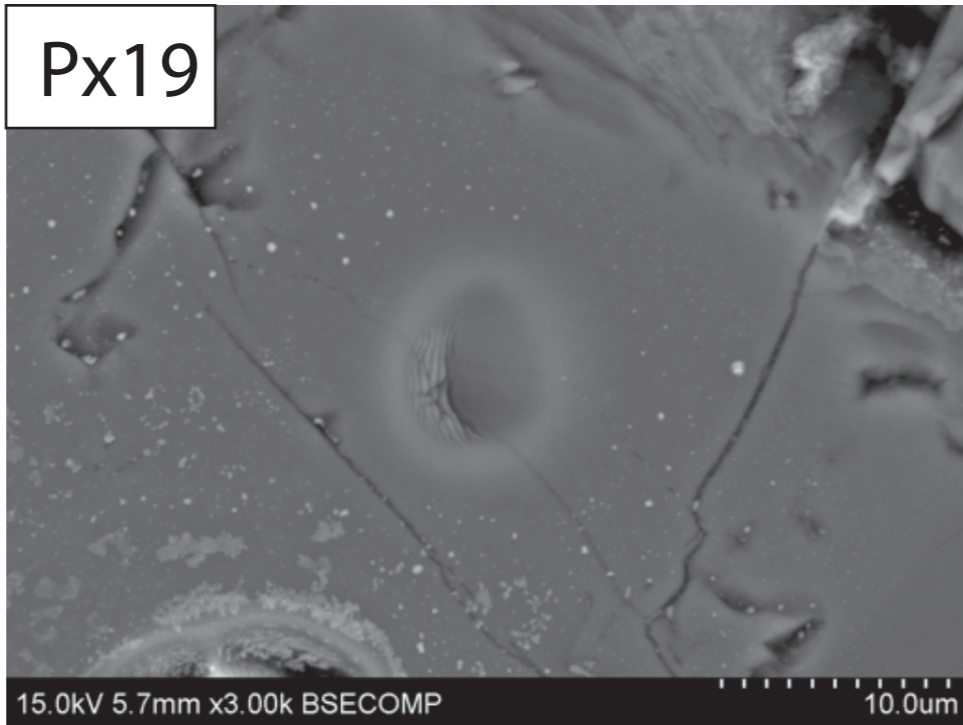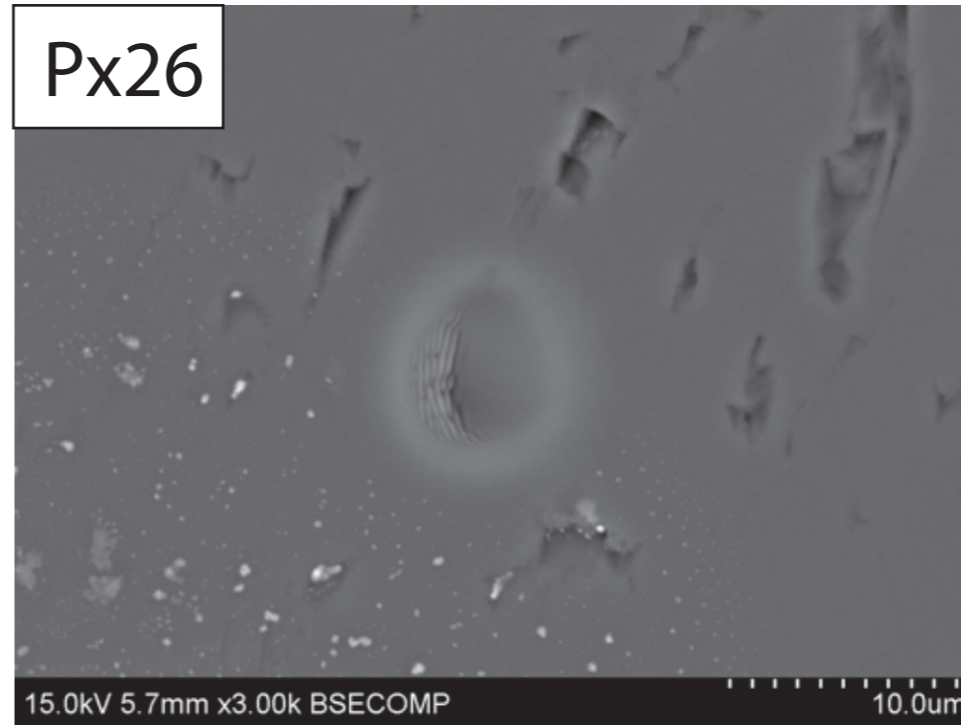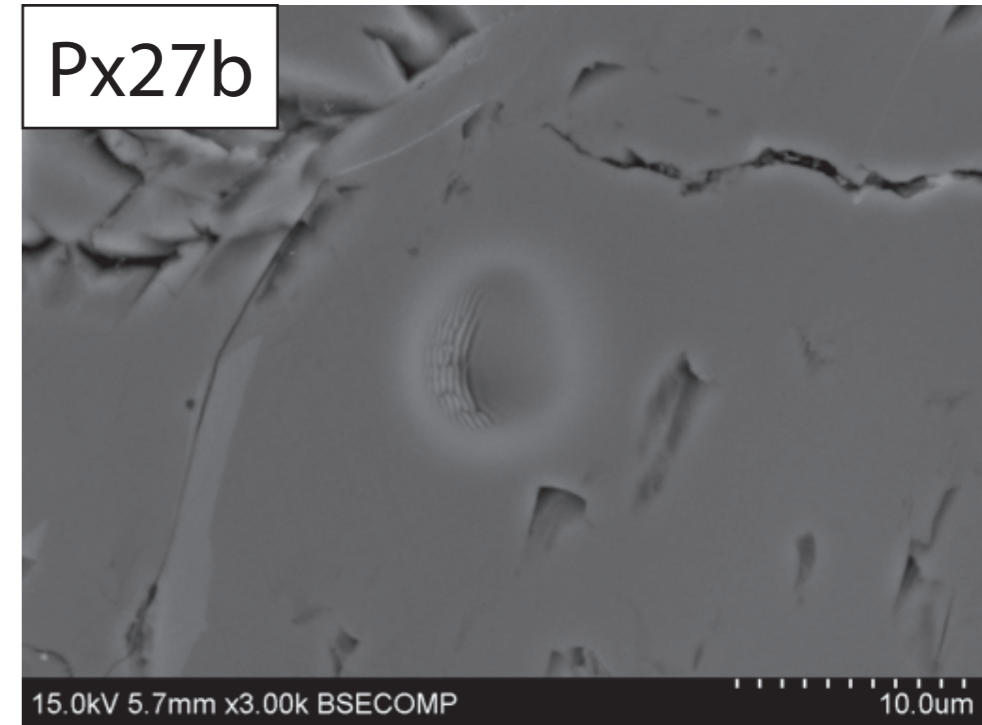

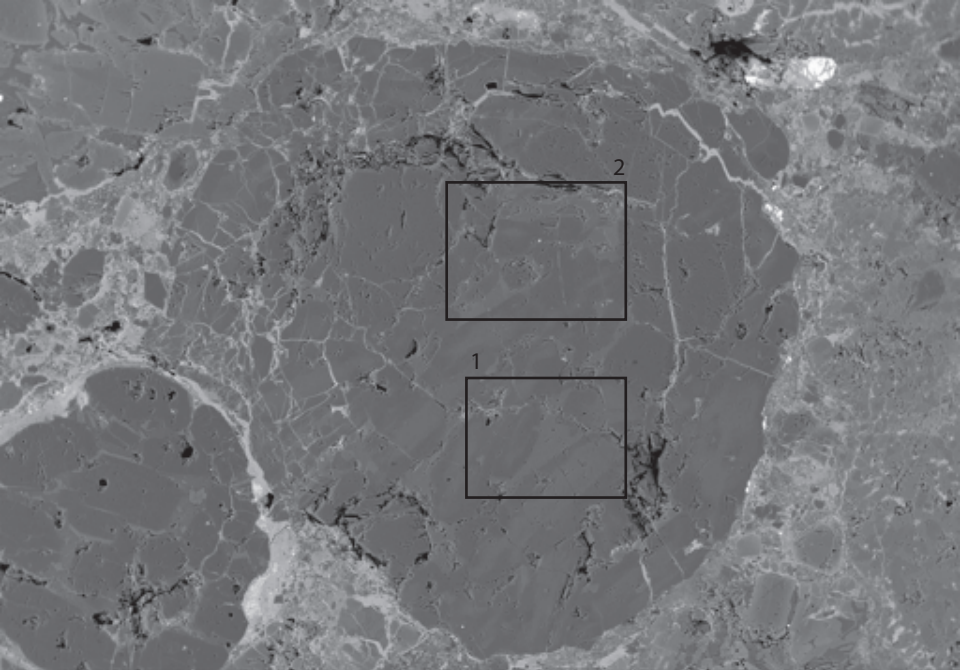

2

1



1

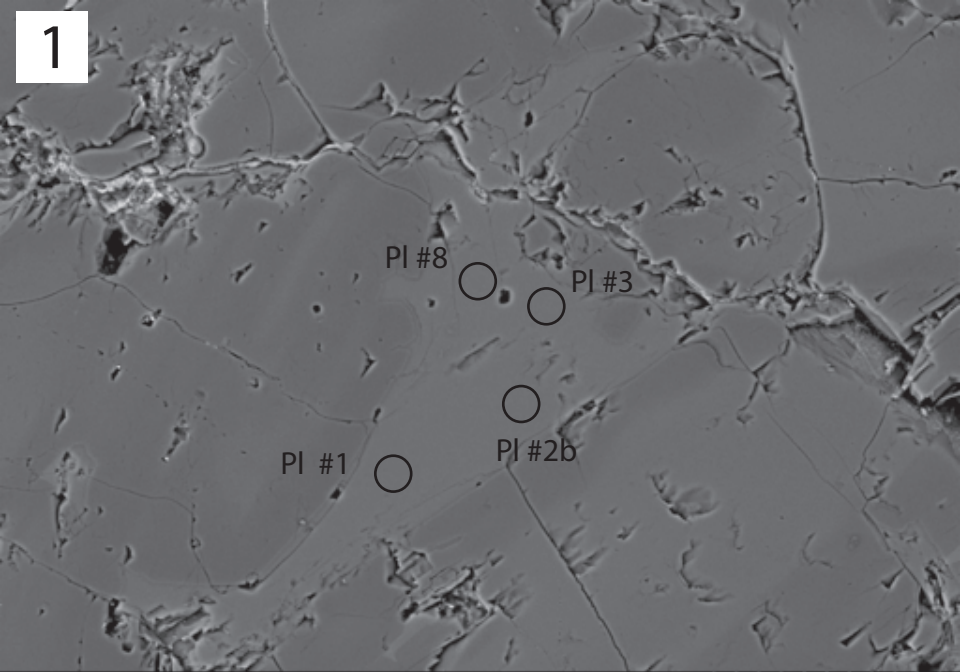

15.0kV x600 BSE3D

50.0um

2

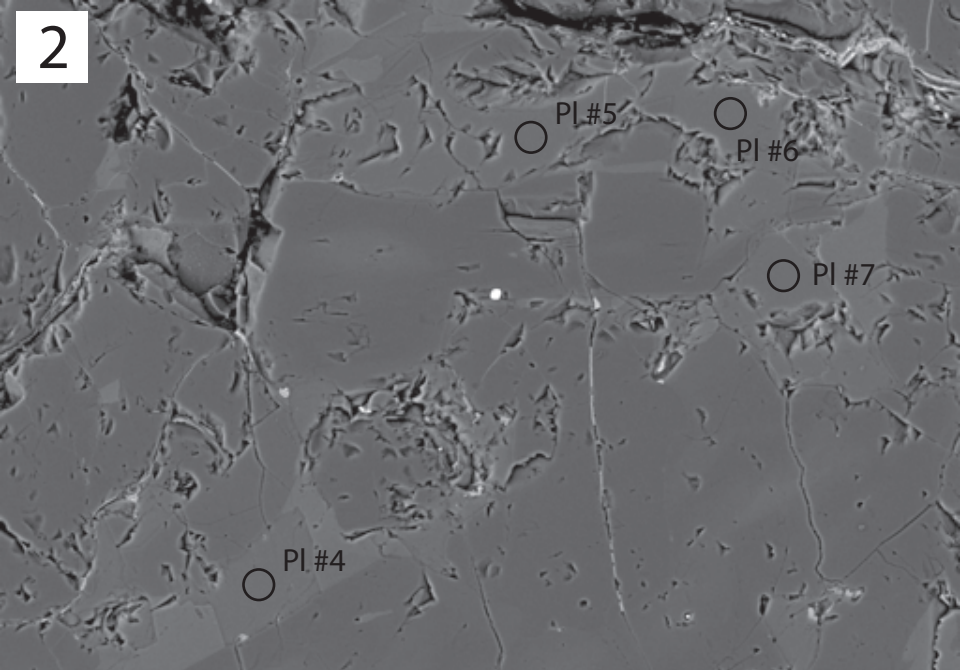

An Al-Mg spots:

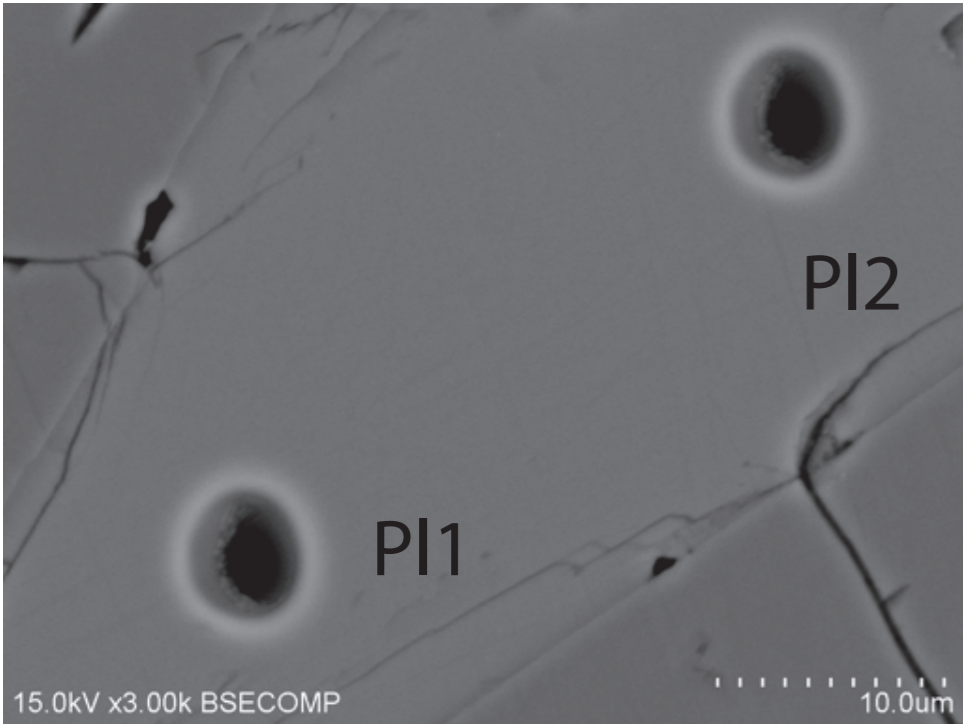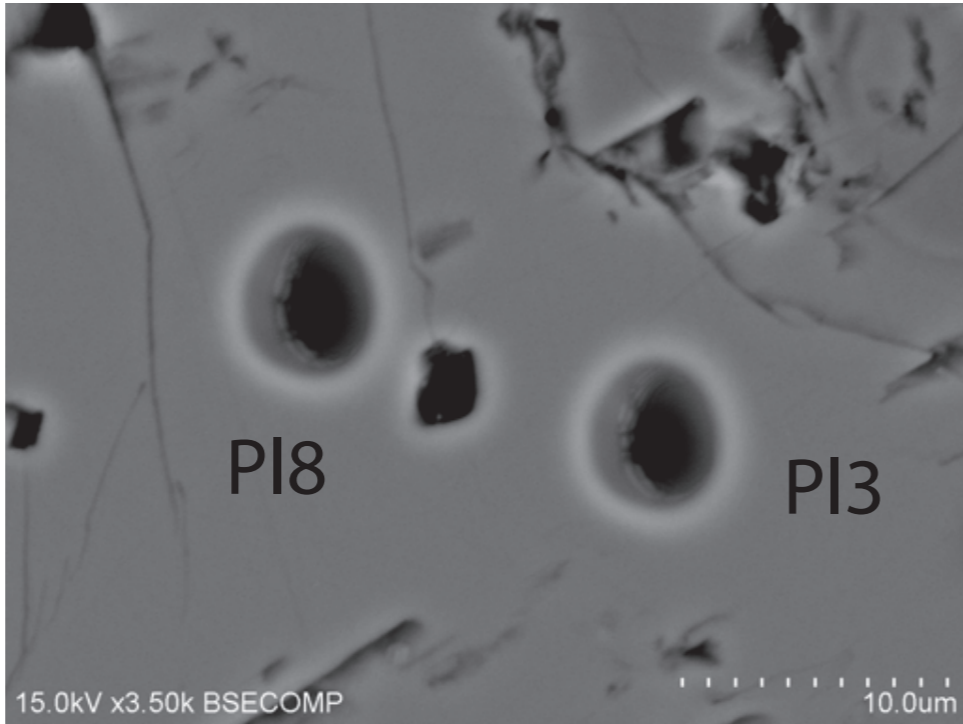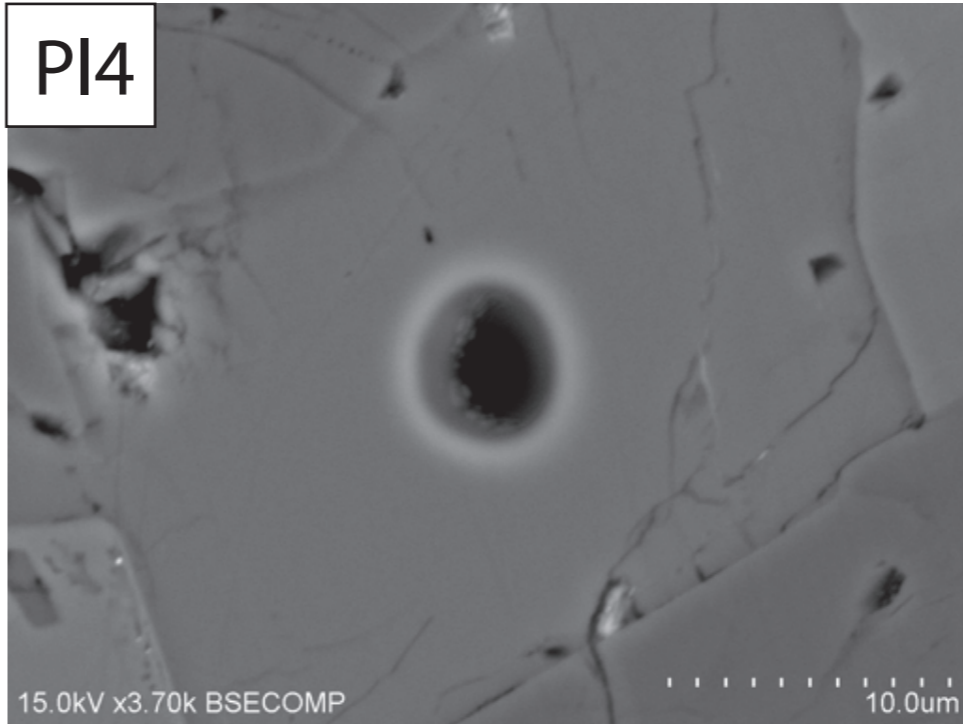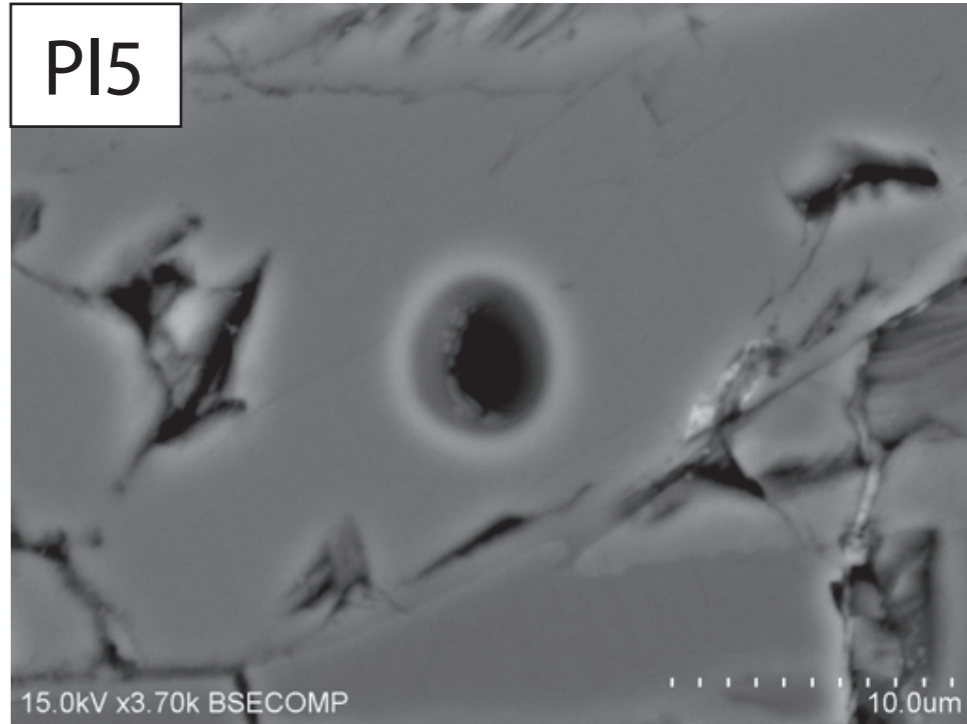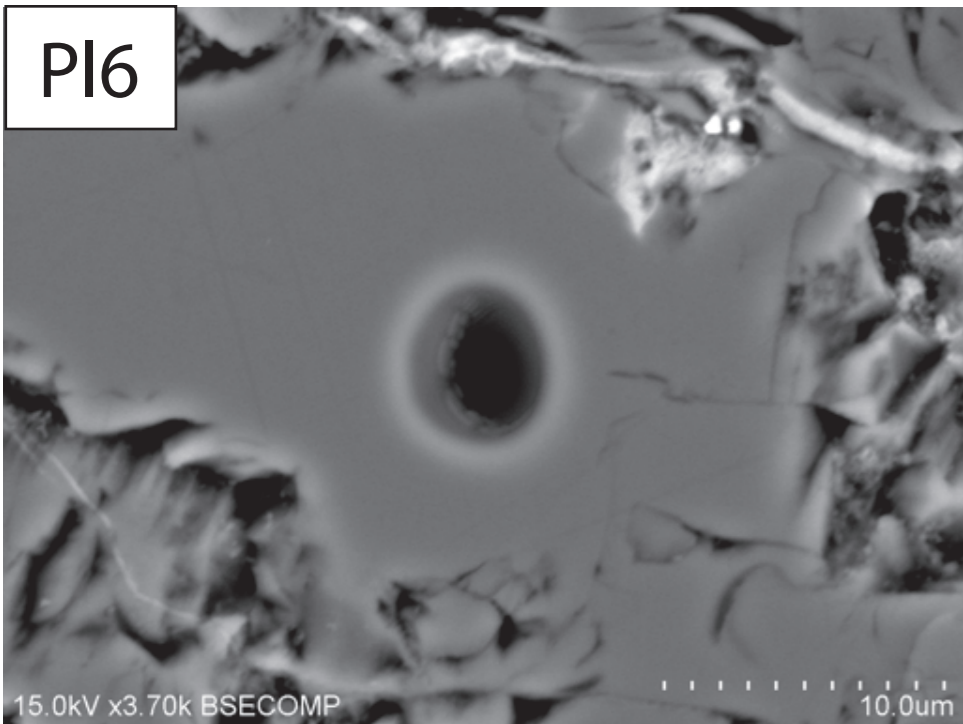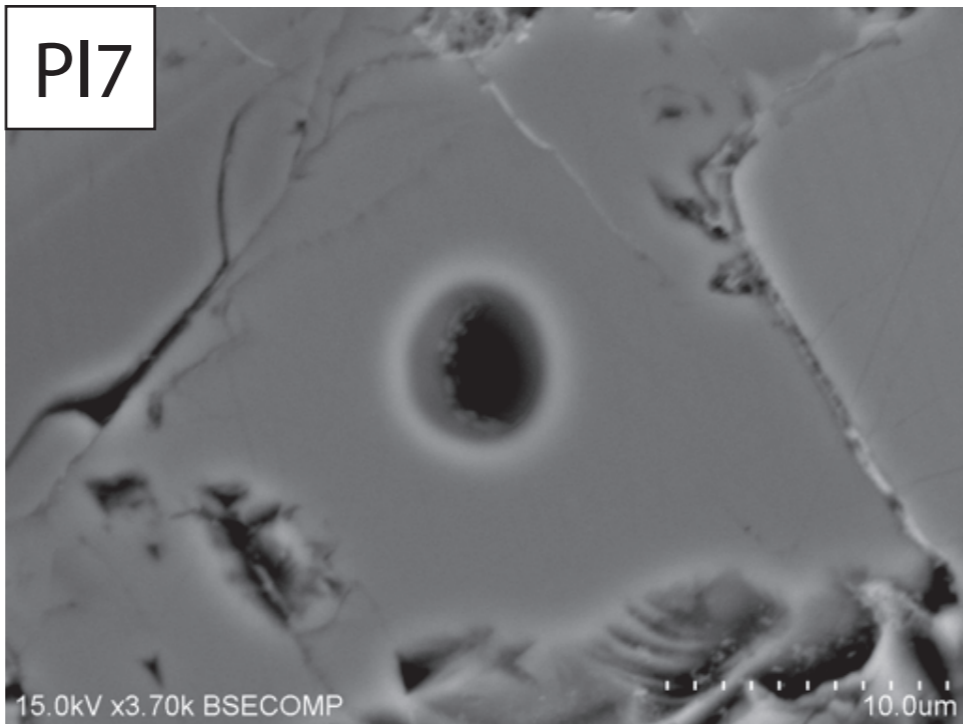

Supplement: NIHMS1757327-supplement-EA6-5.pdf [file NIHMS1757327-supplement-EA6-5.pdf]
