# Supplementary material
Source: PubMed Central journal article supplement (PMC8740609)

Electronic Annex EA 6-6: Location of SIMS analyses for NWA 8649 c87  
New constraints from  $^{26}\text{Al}$ - $^{26}\text{Mg}$  chronology of anorthite  
bearing chondrules in unequilibrated ordinary chondrites  
*Guillaume Siron, Kohei Fukuda, Makoto Kimura, and Noriko T. Kita*

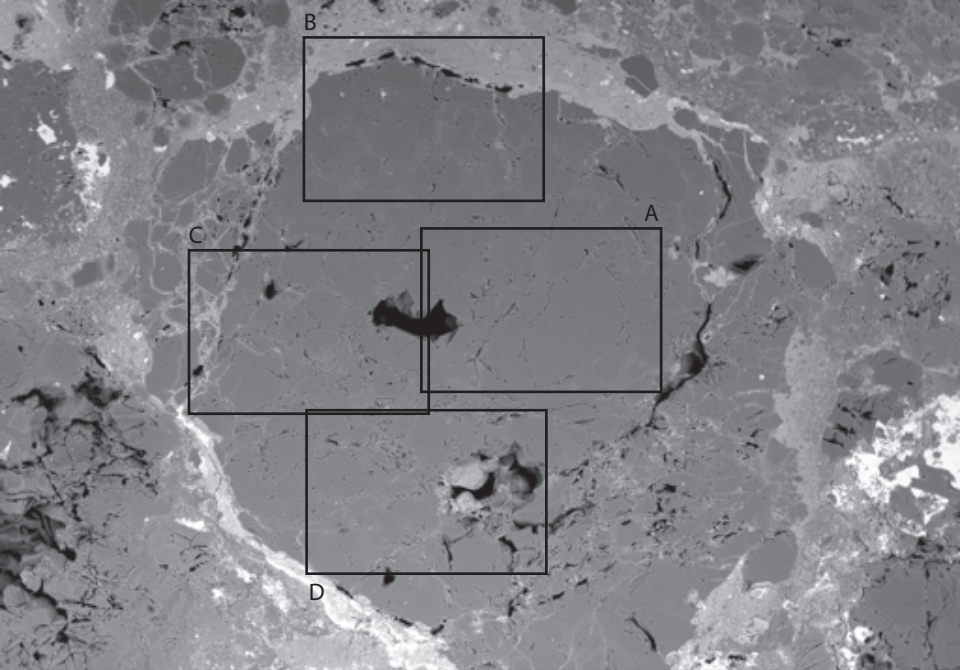

B

A

C

D

A

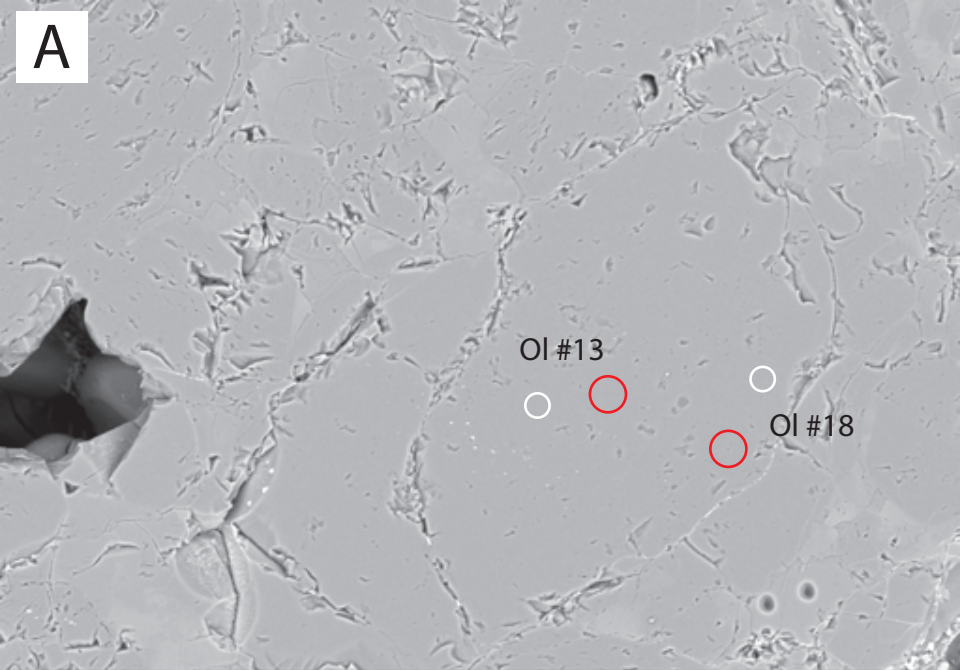

OI #13

OI #18

**B**

 Ol #12b

 Ol #12

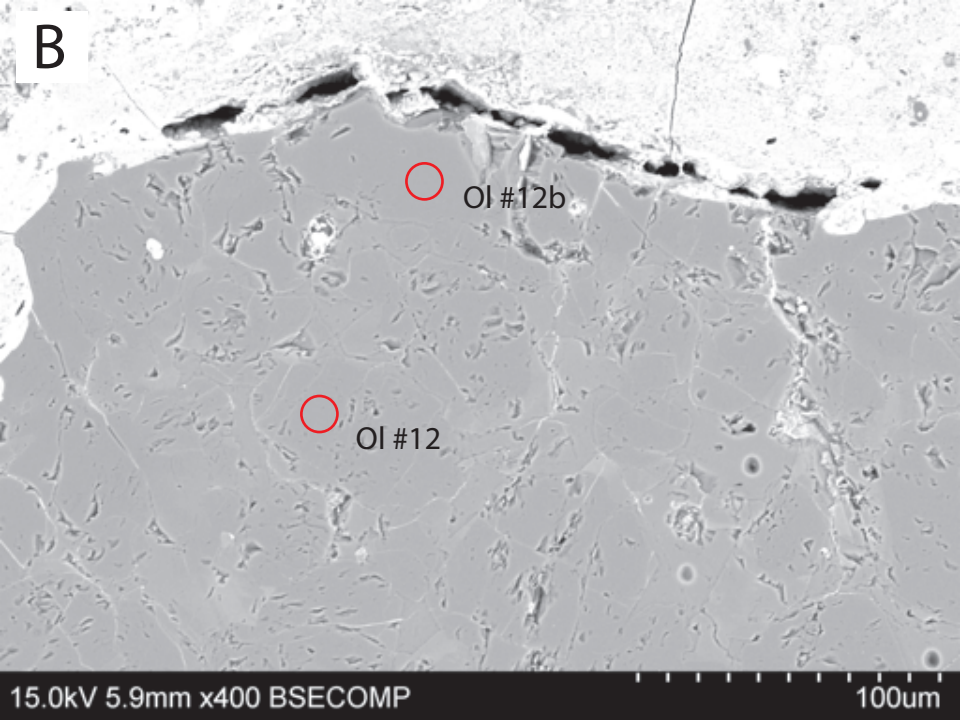

C

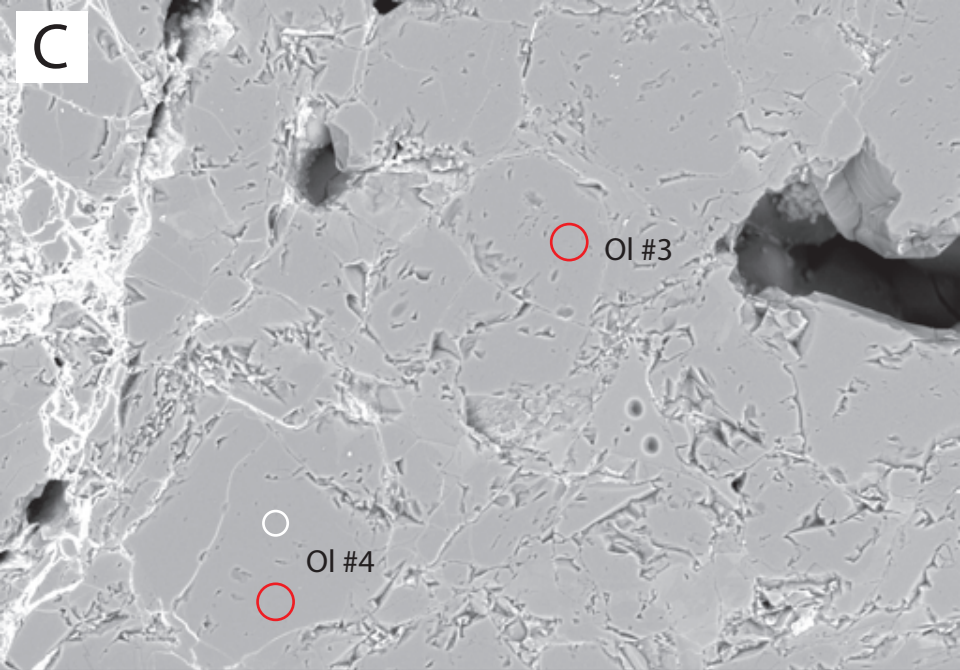

Ol #4

Ol #3

D

○ Ol #5

○ Ol #17

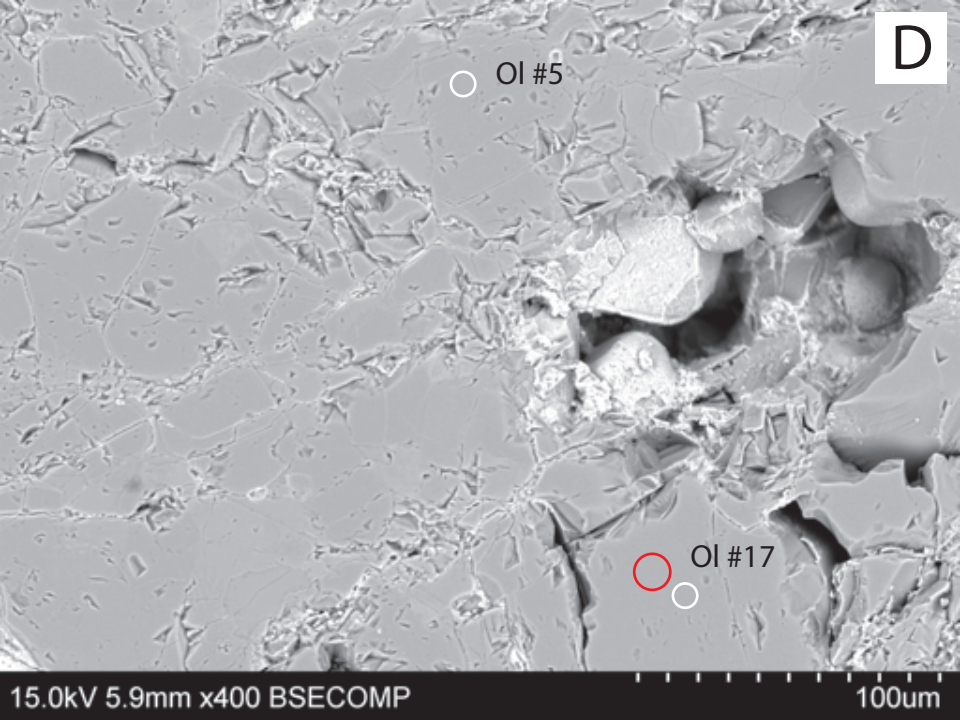

Ol-Px oxygen spots:

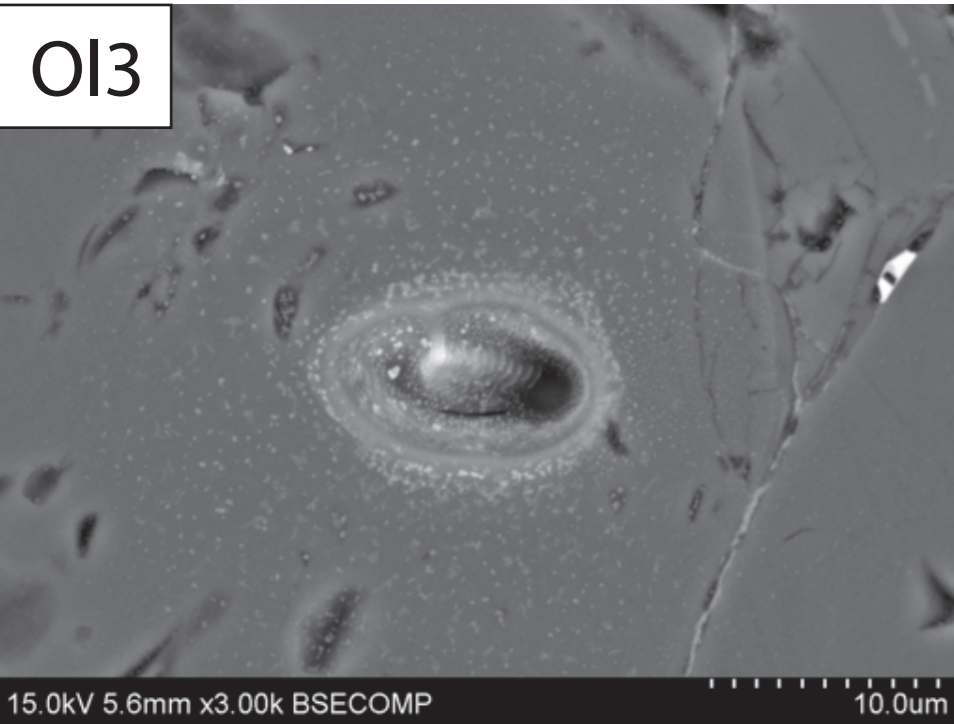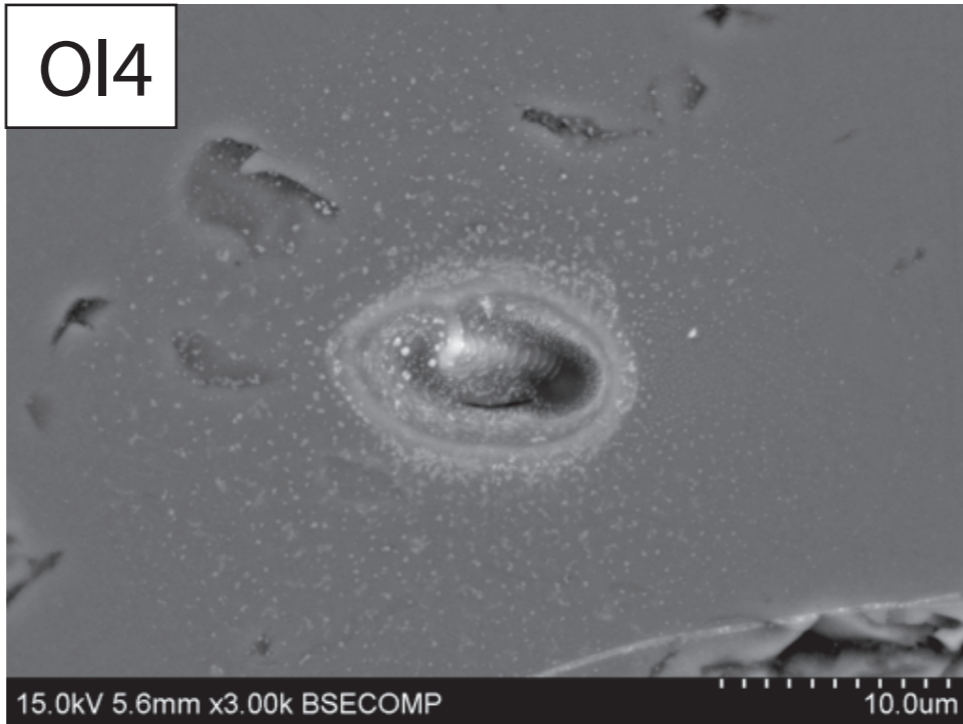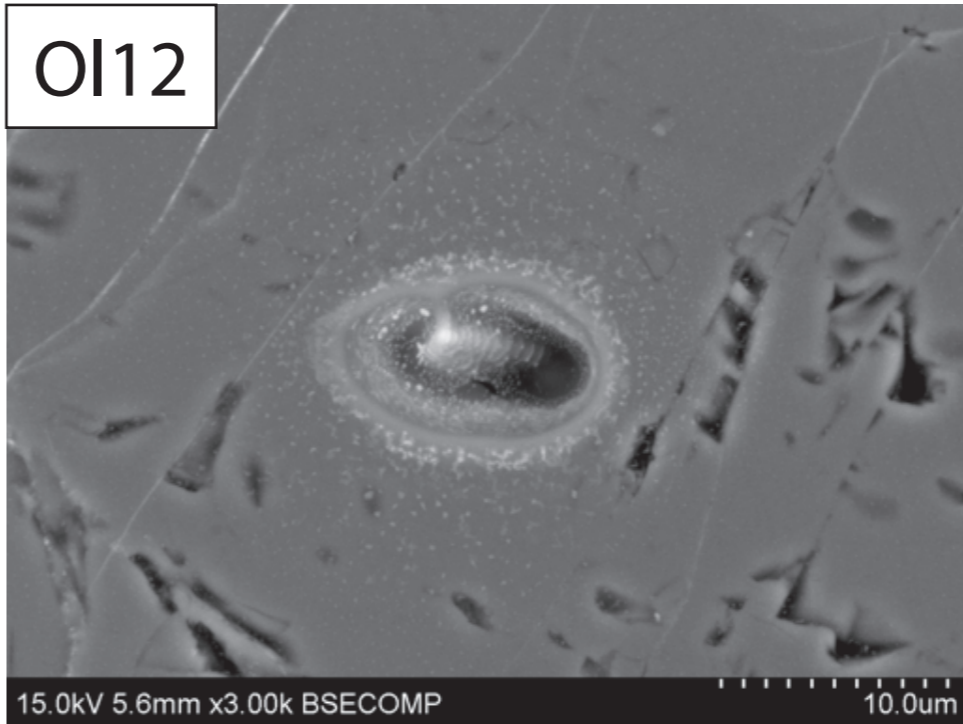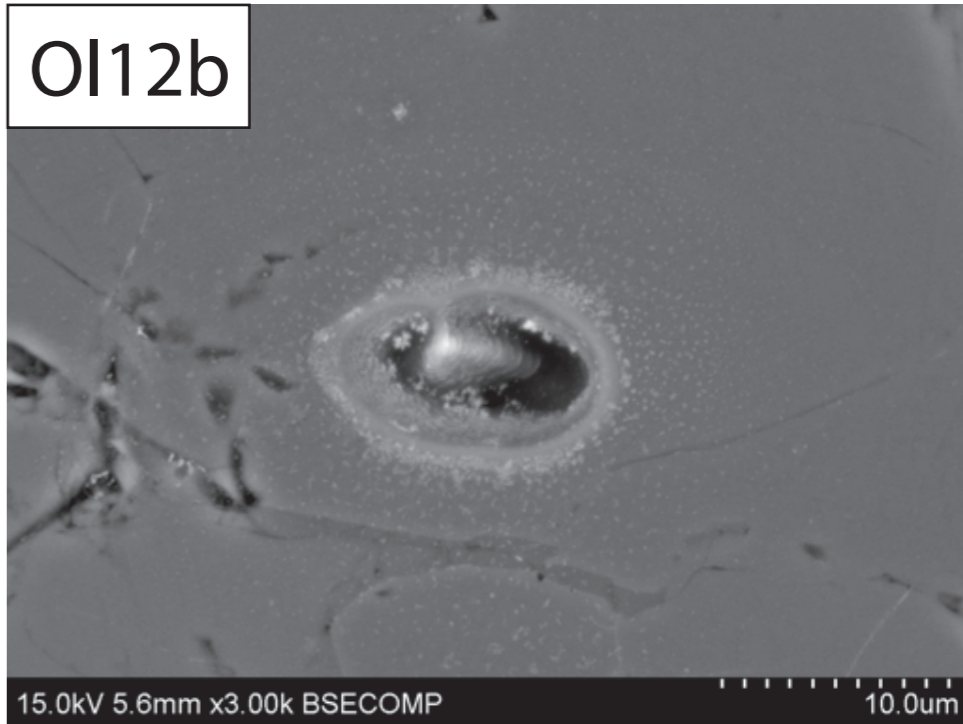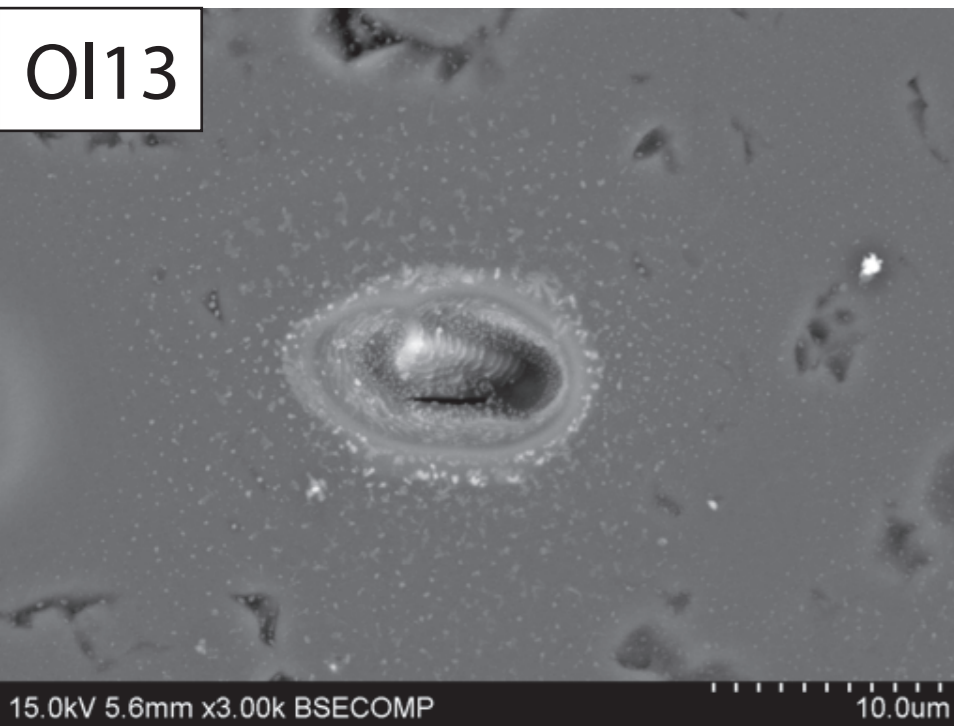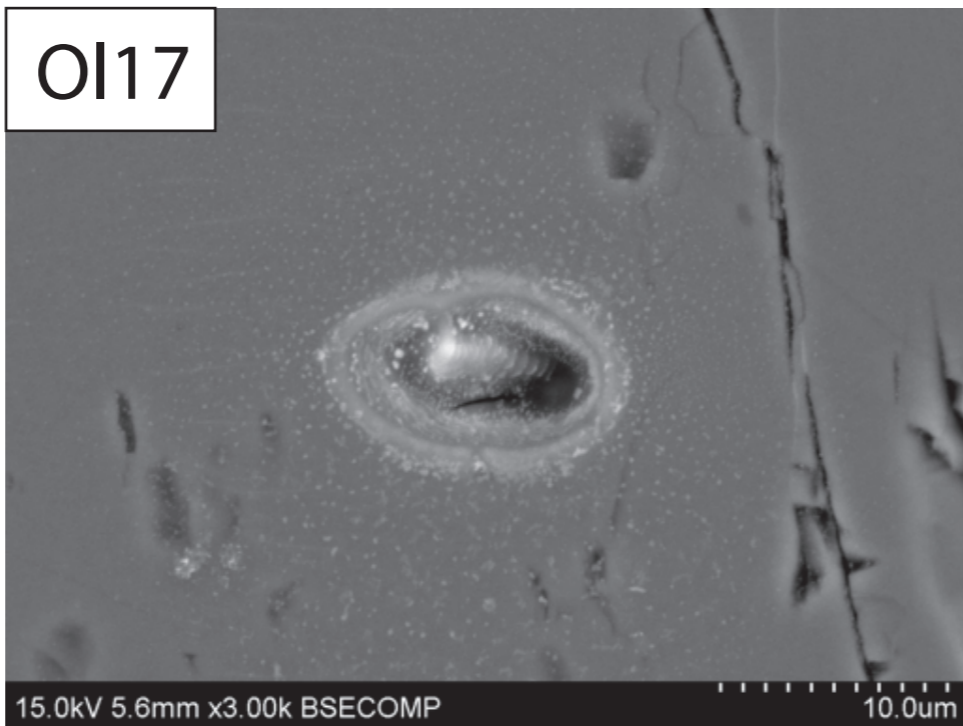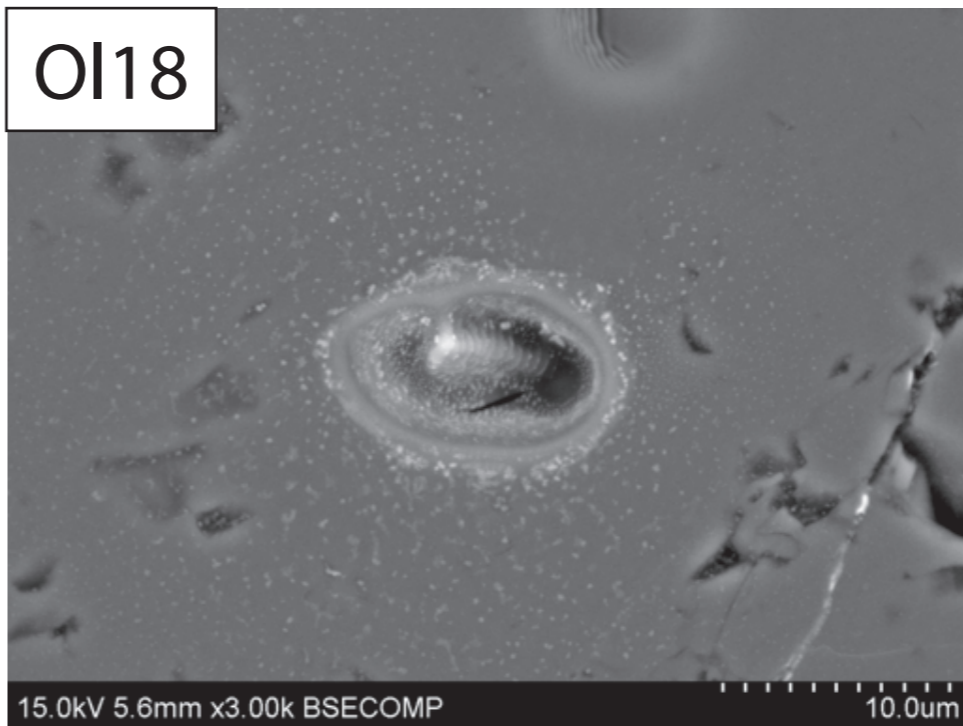

Ol-Px Al-Mg spots:

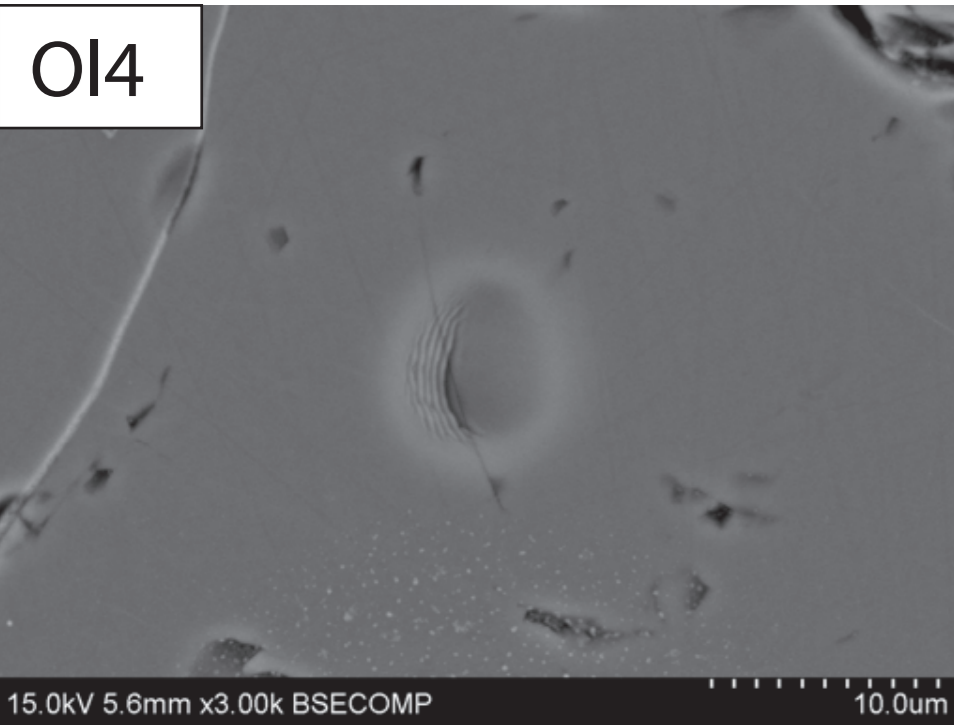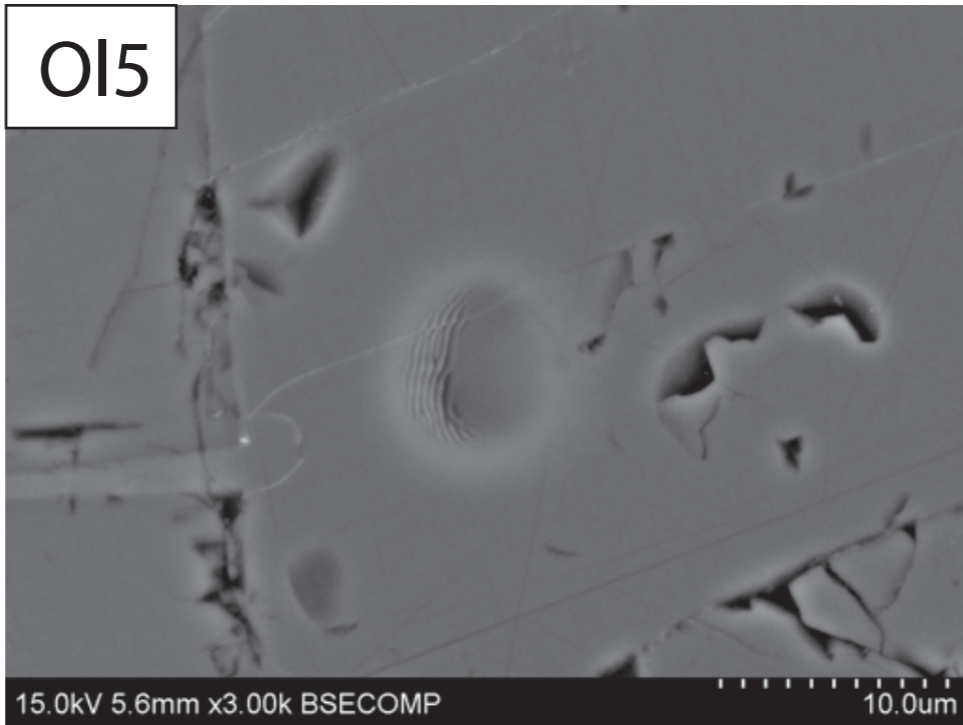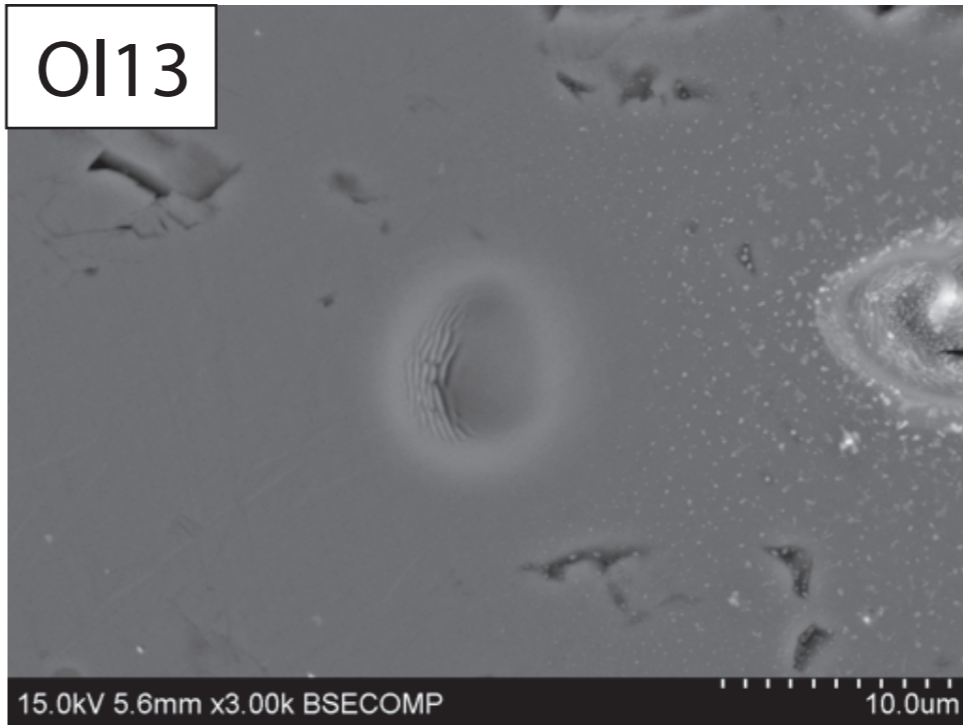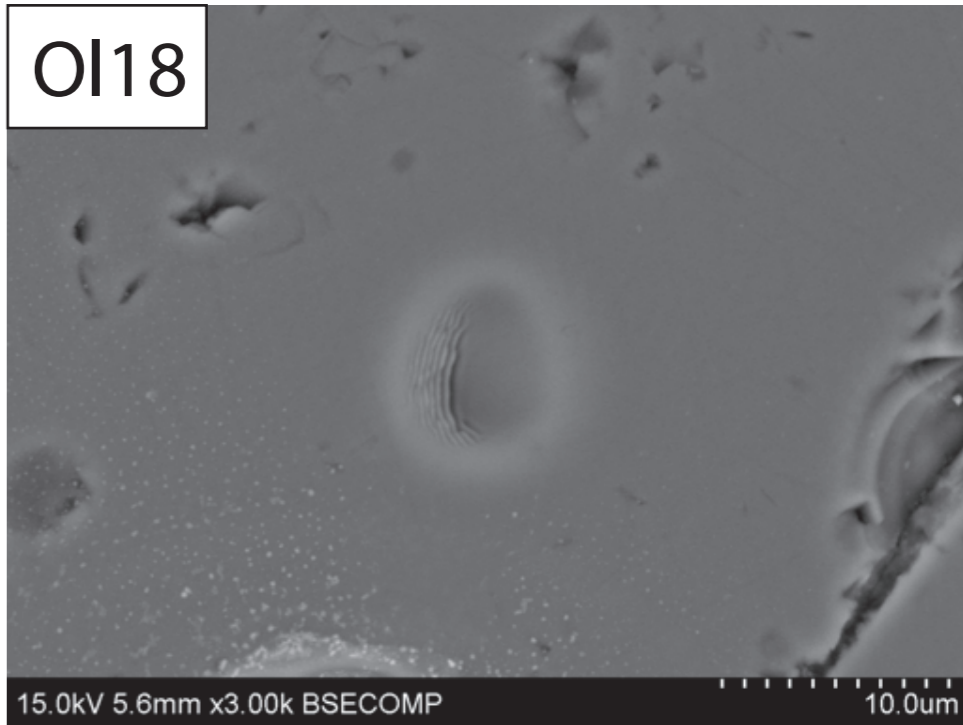

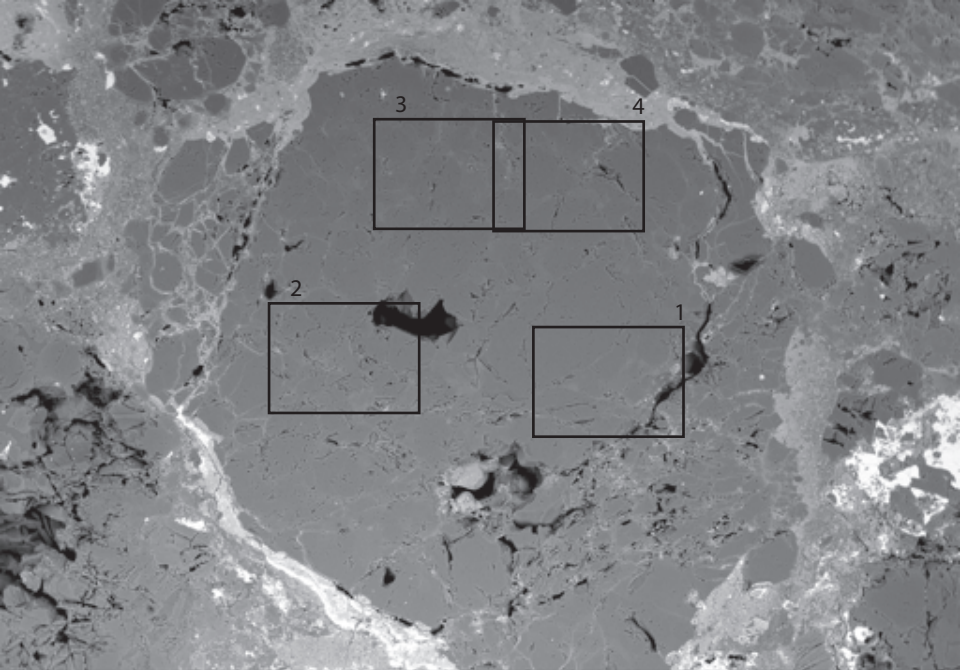



1

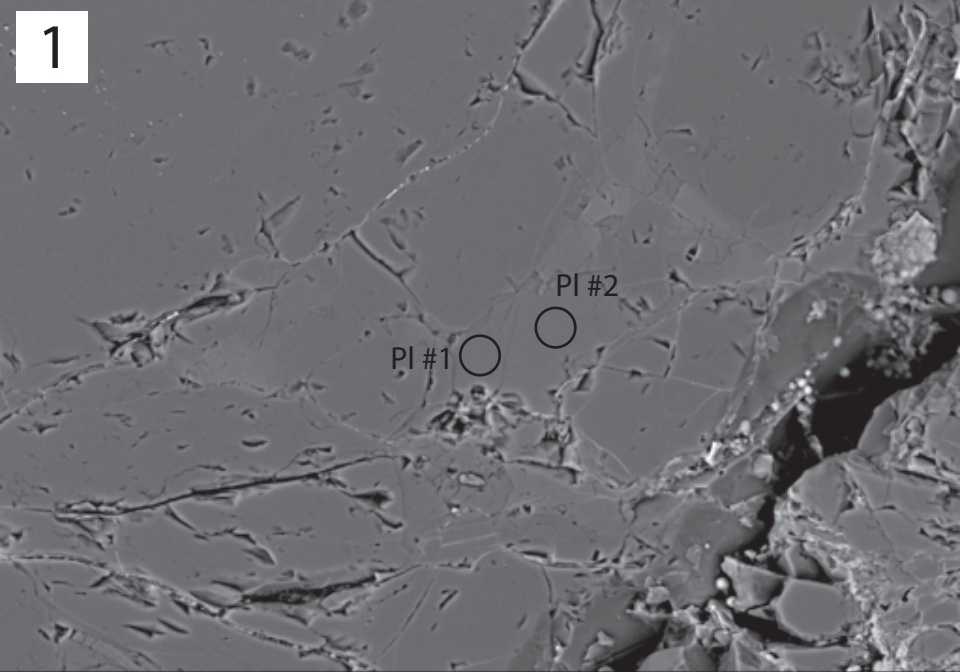

15.0kV x650 BSE3D

50.0um

2

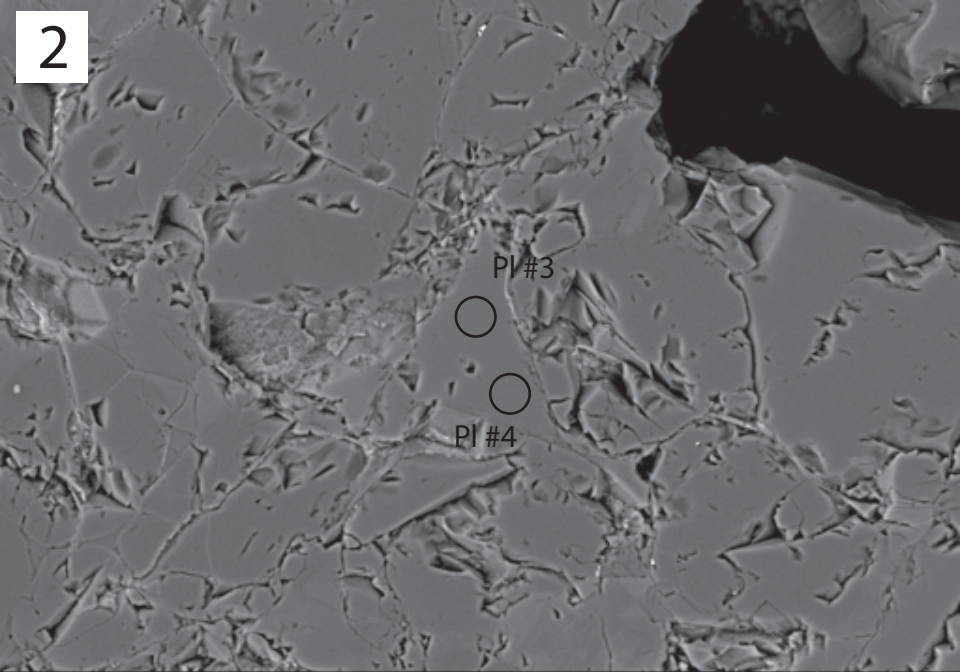

PI #3

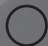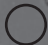

PI #4

3

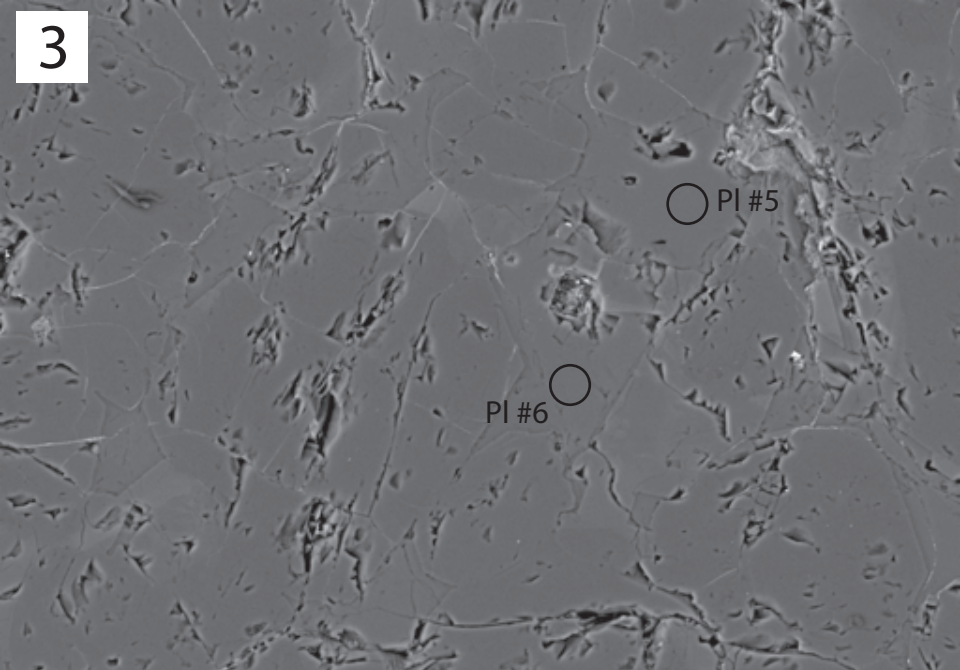

PI #5

PI #6

4

PI #7

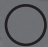

PI #8

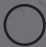

# An Al-Mg spots:

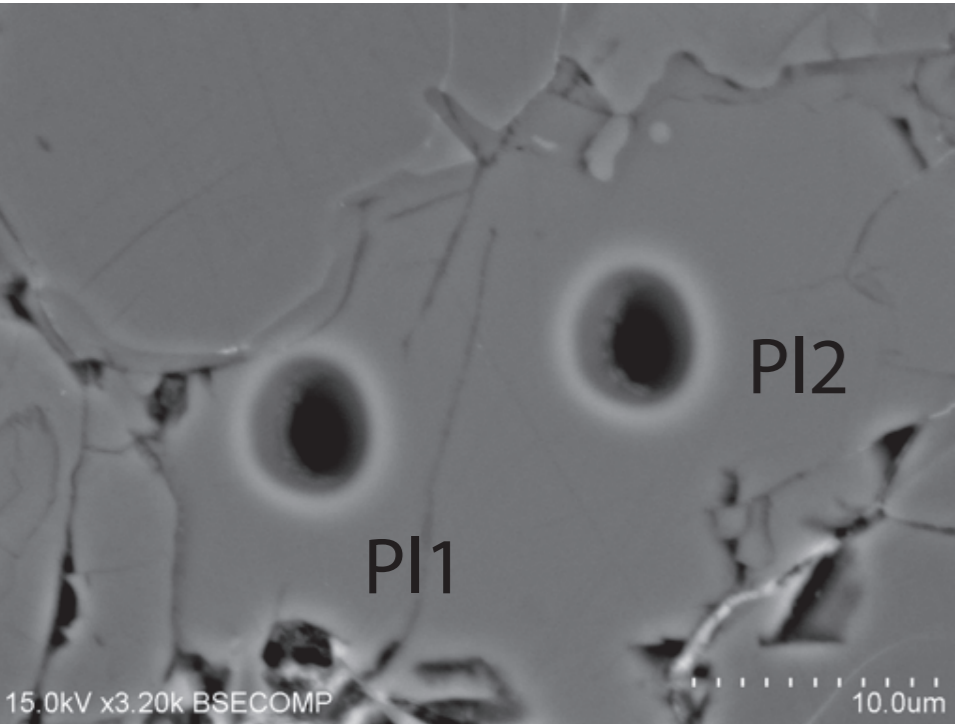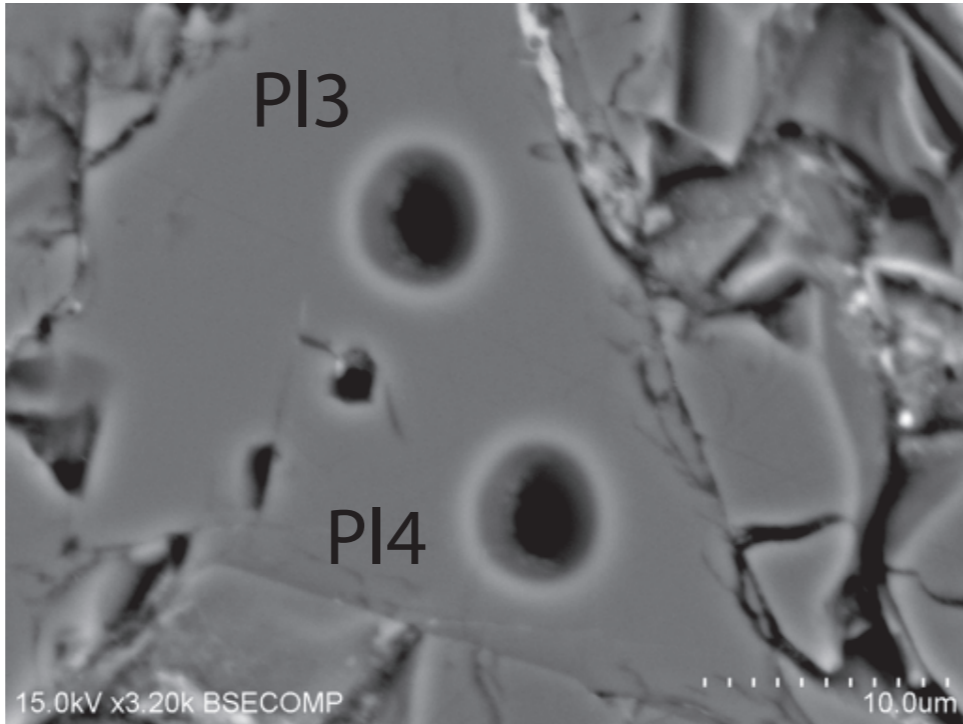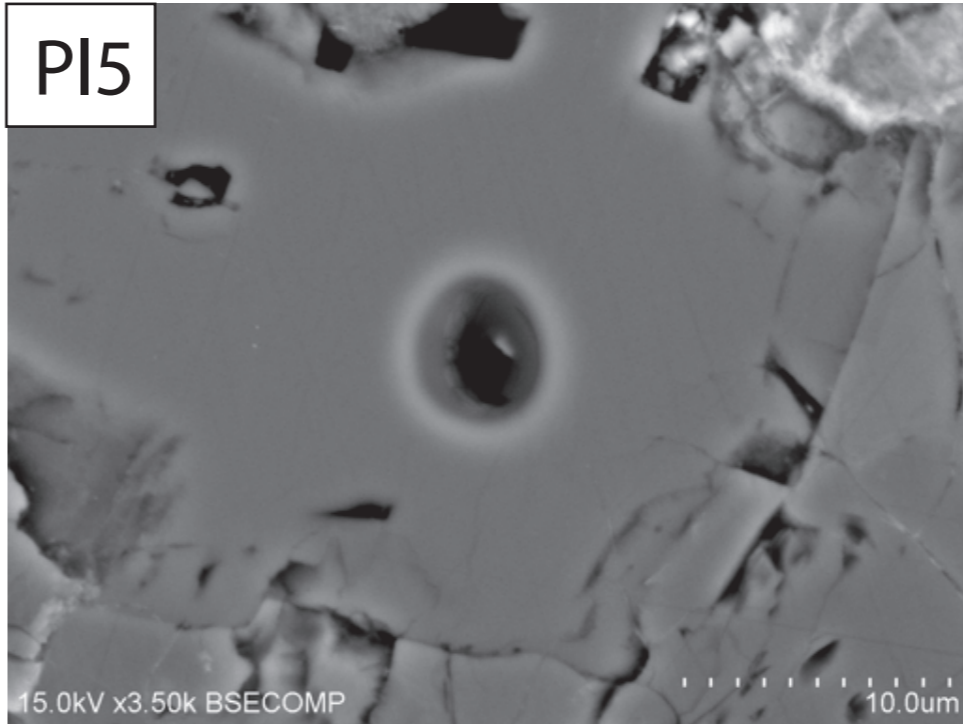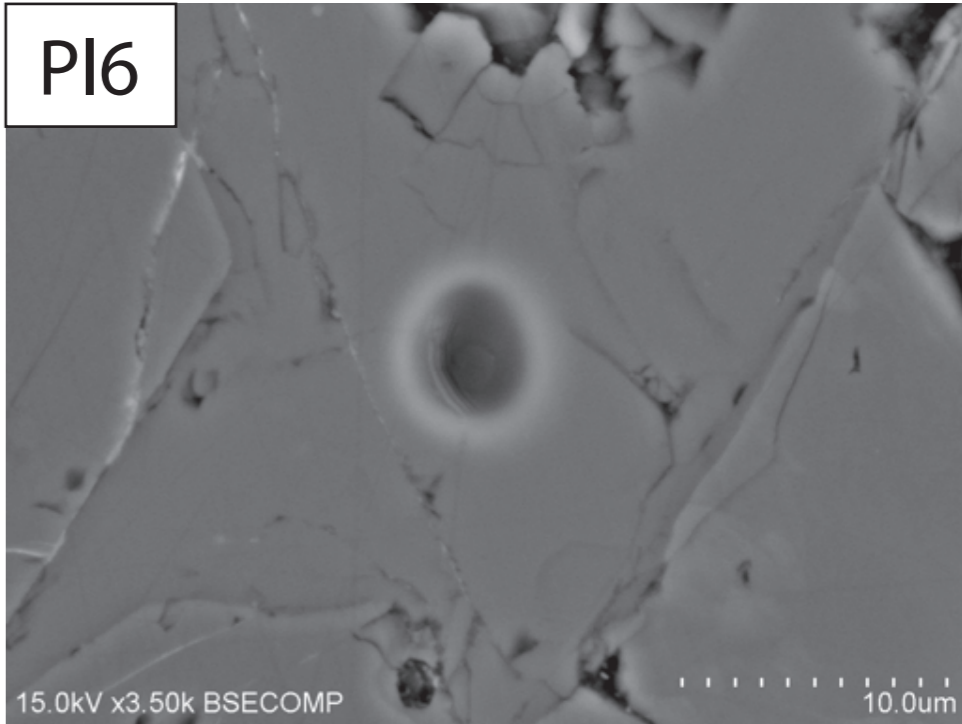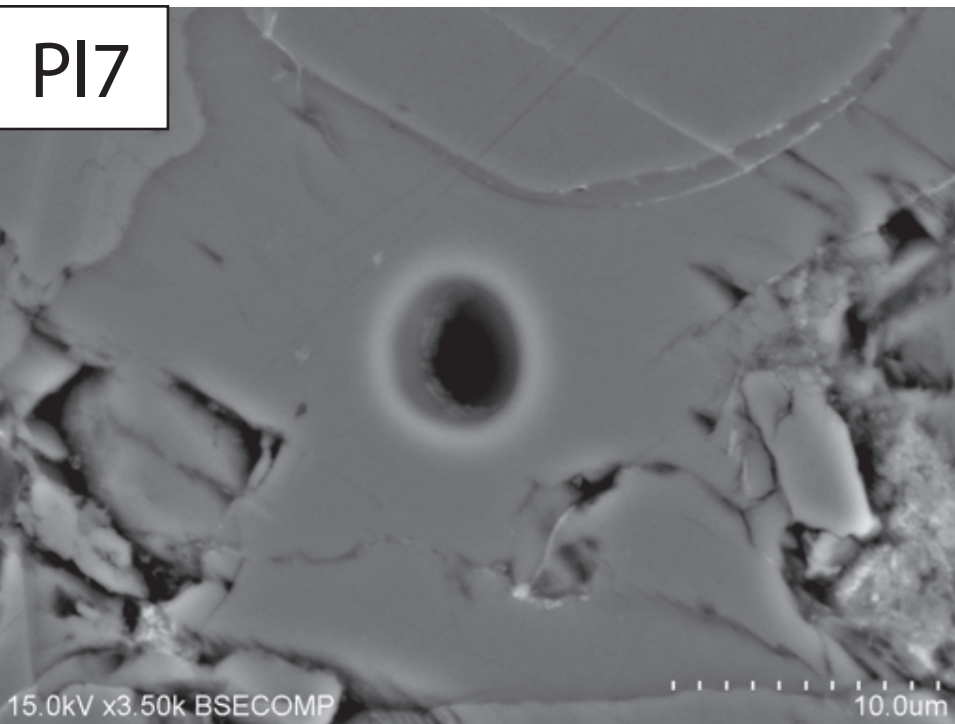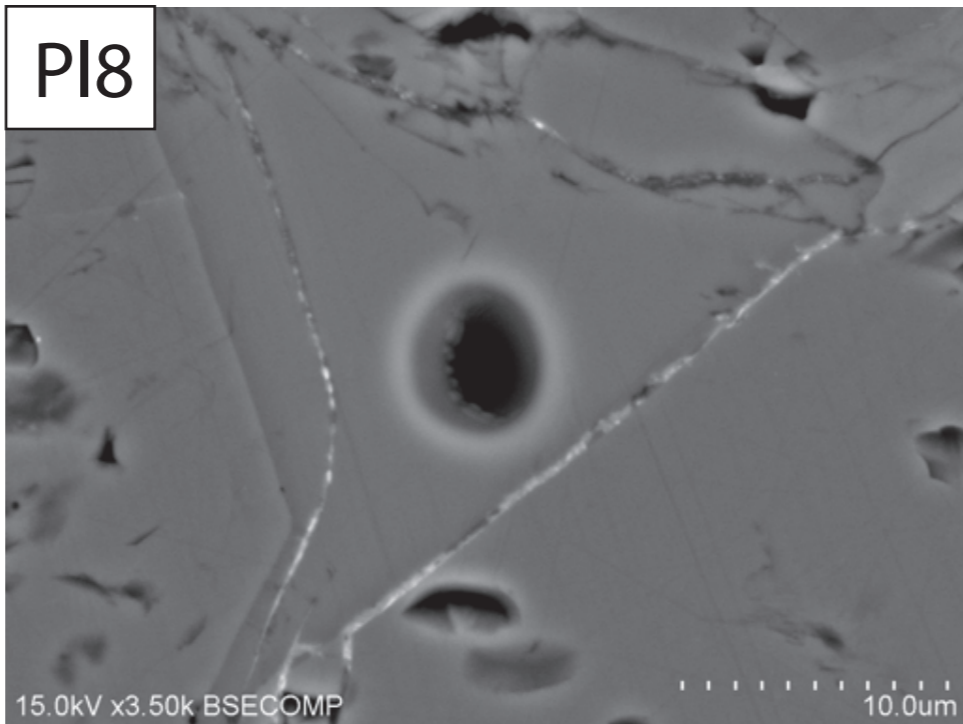

Supplement: NIHMS1757327-supplement-EA6-6.pdf [file NIHMS1757327-supplement-EA6-6.pdf]
