# Supplementary material
Source: PubMed Central journal article supplement (PMC8740609)

Electronic Annex EA 6-7: Location of SIMS analyses for MET 00452 c19  
New constraints from  $^{26}\text{Al}$ - $^{26}\text{Mg}$  chronology of anorthite  
bearing chondrules in unequilibrated ordinary chondrites  
*Guillaume Siron, Kohei Fukuda, Makoto Kimura, and Noriko T. Kita*

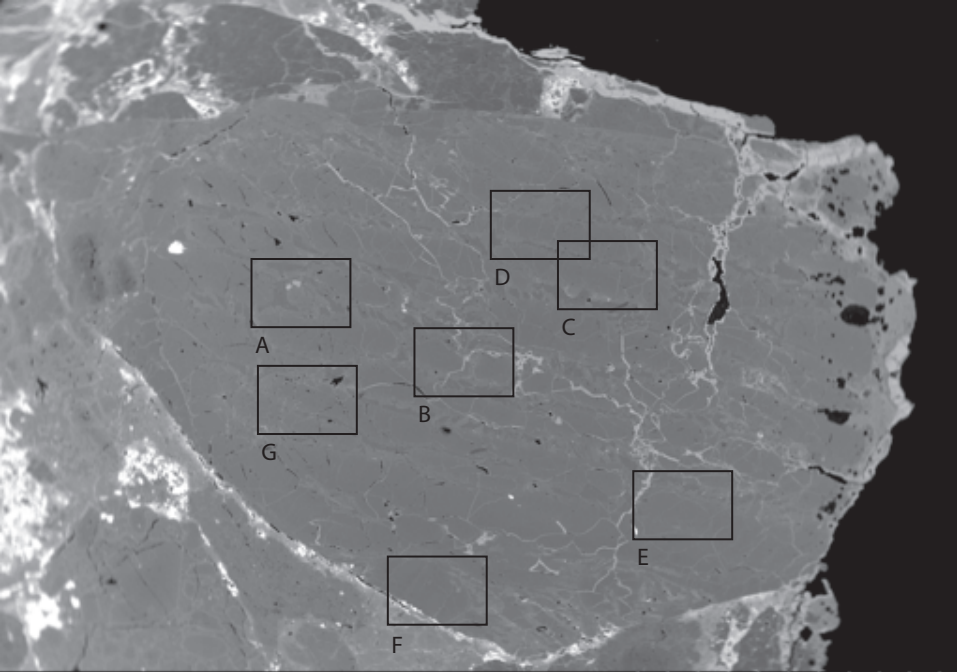

A

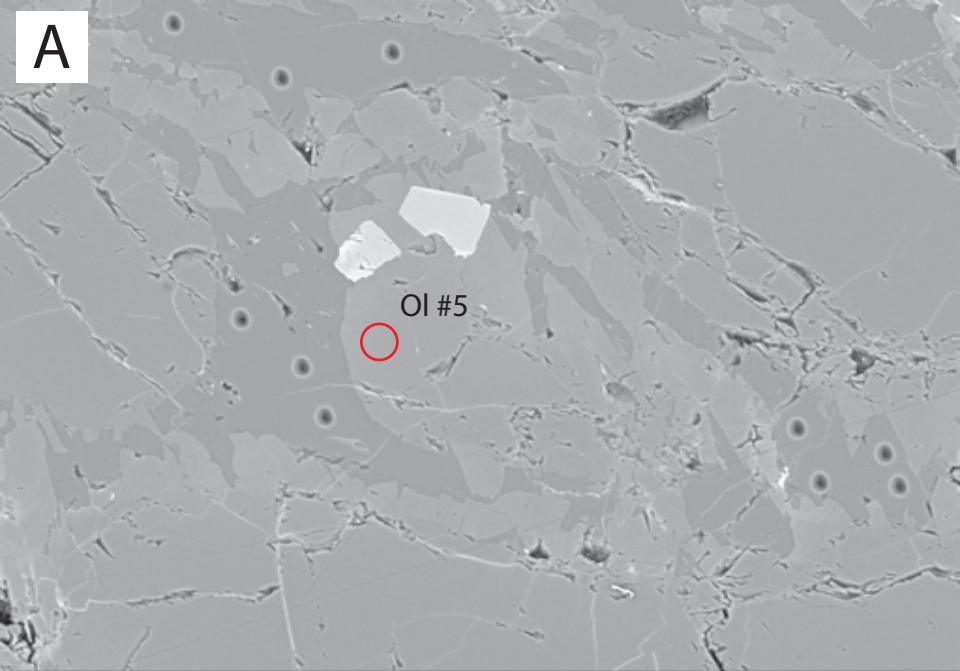

OI #5

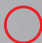

15.0kV 5.9mm x400 BSECOMP

100um

**B**

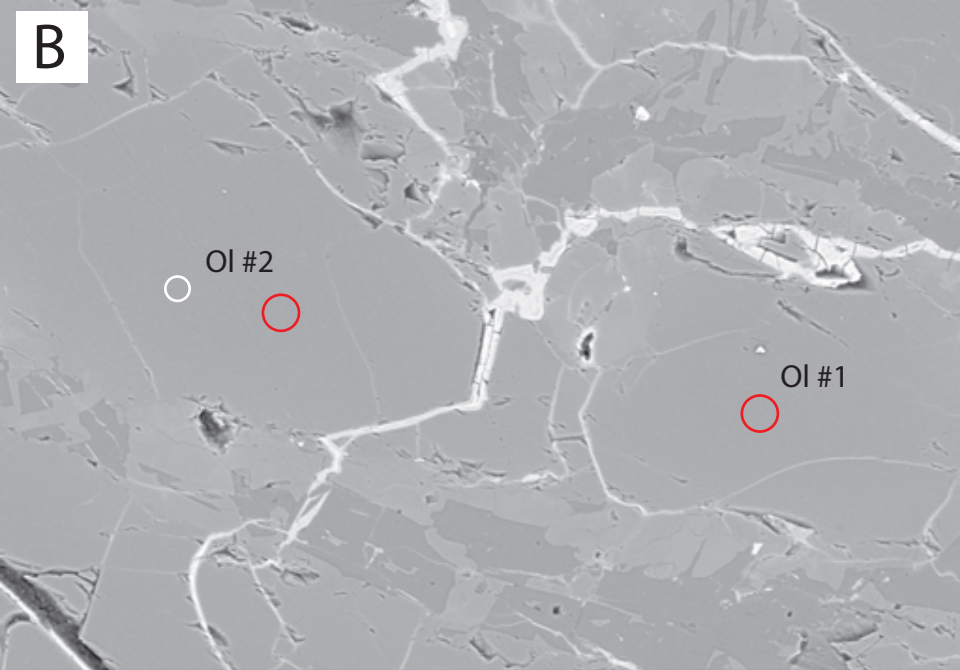

Ol #2

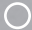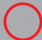

Ol #1

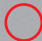

C

Ol #8

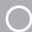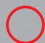

D

OI #7



E

Ol #9

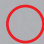

F

Px #10

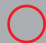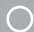



G

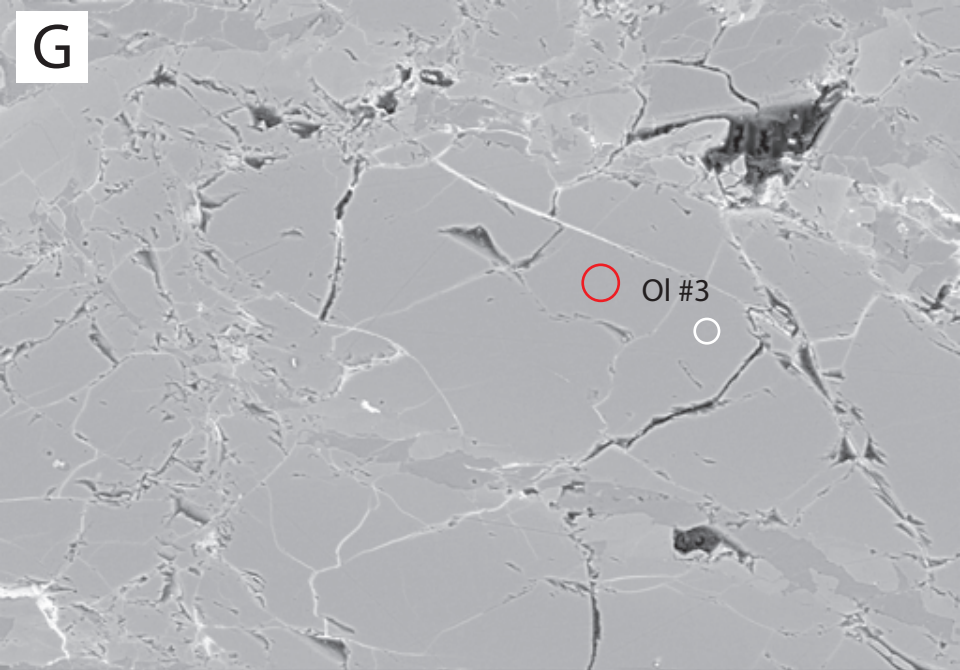

OI #3

Ol-Px oxygen spots:

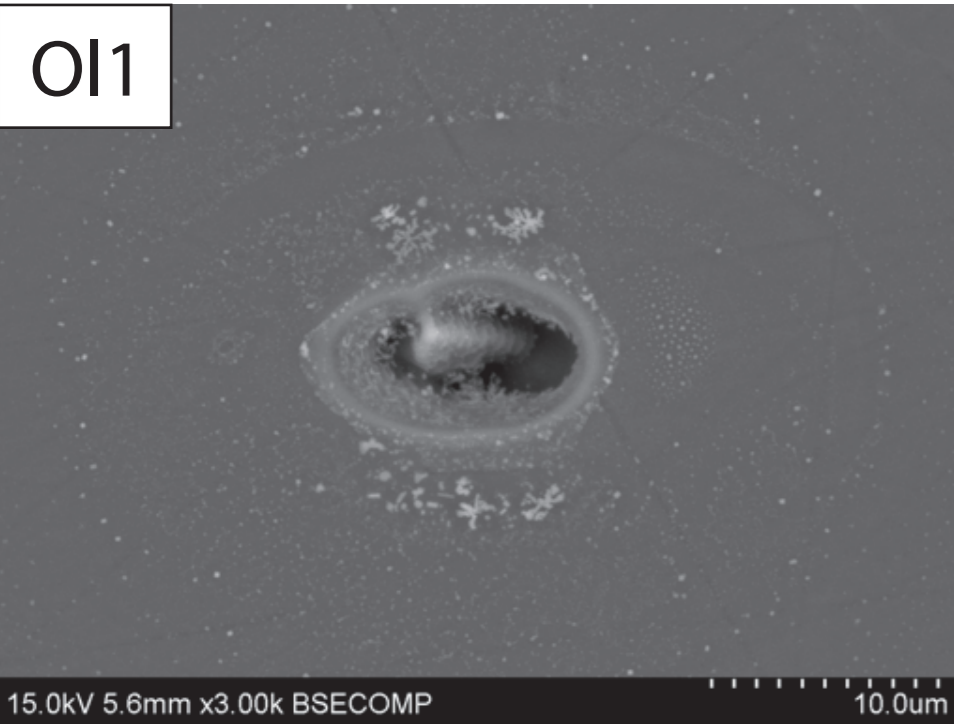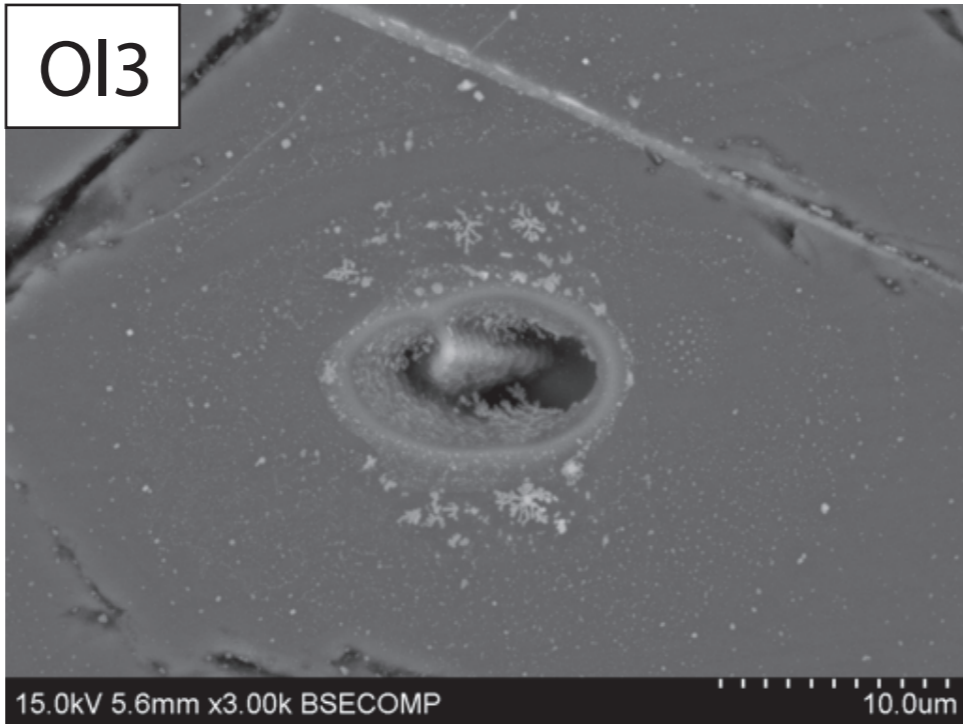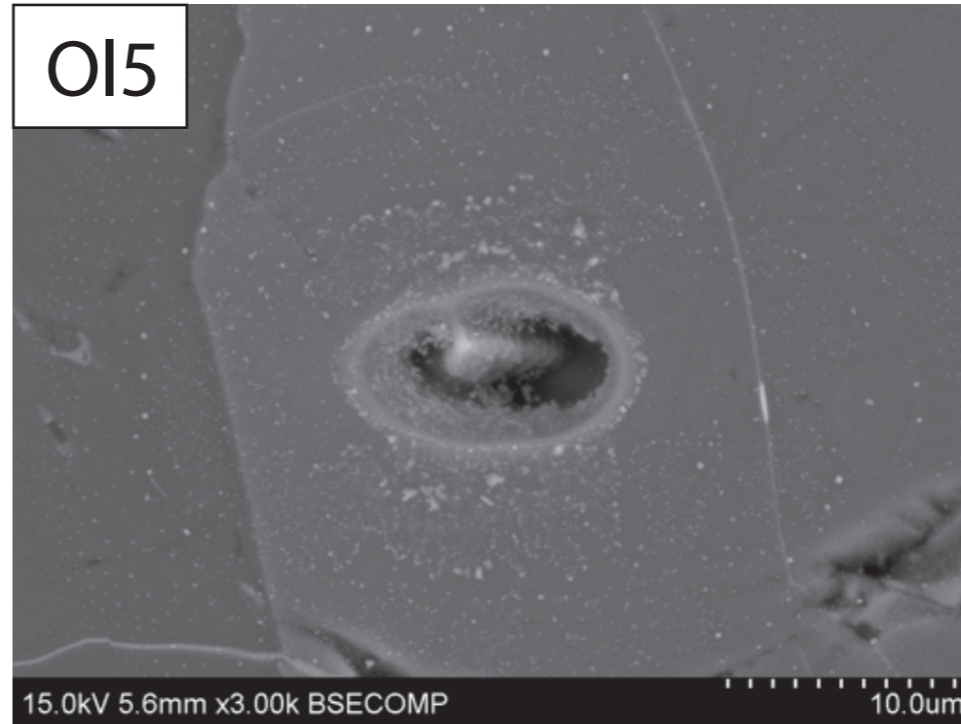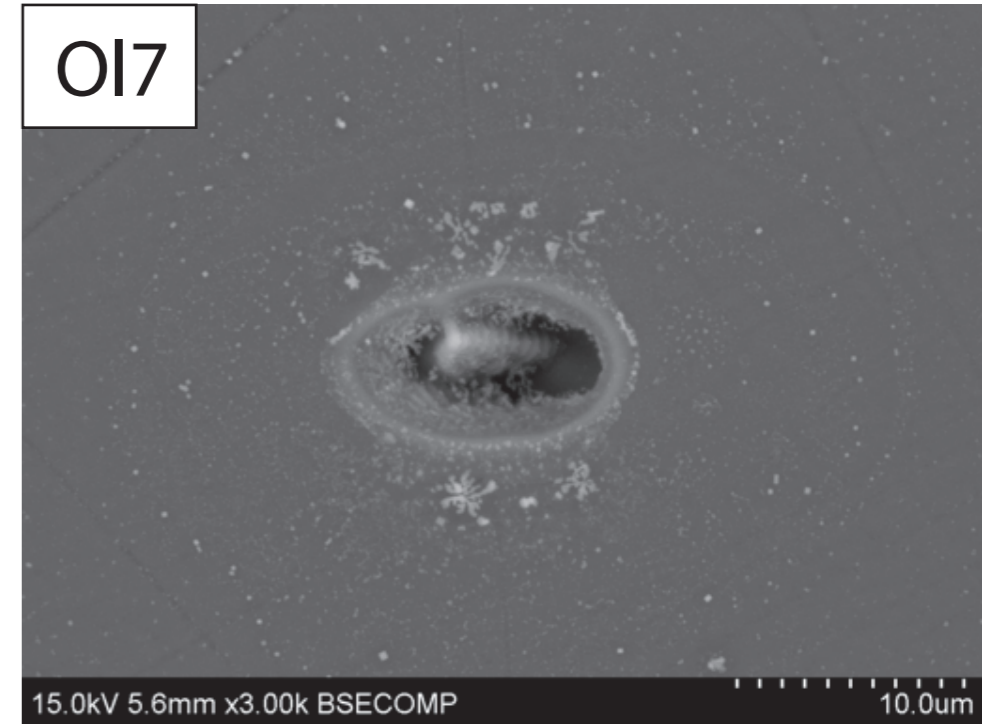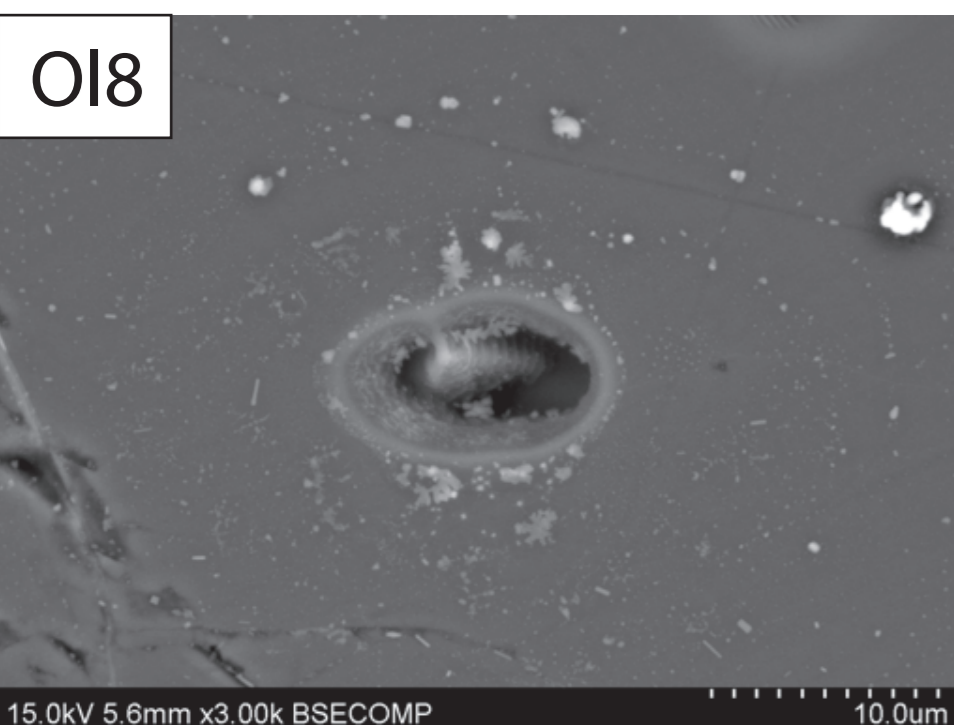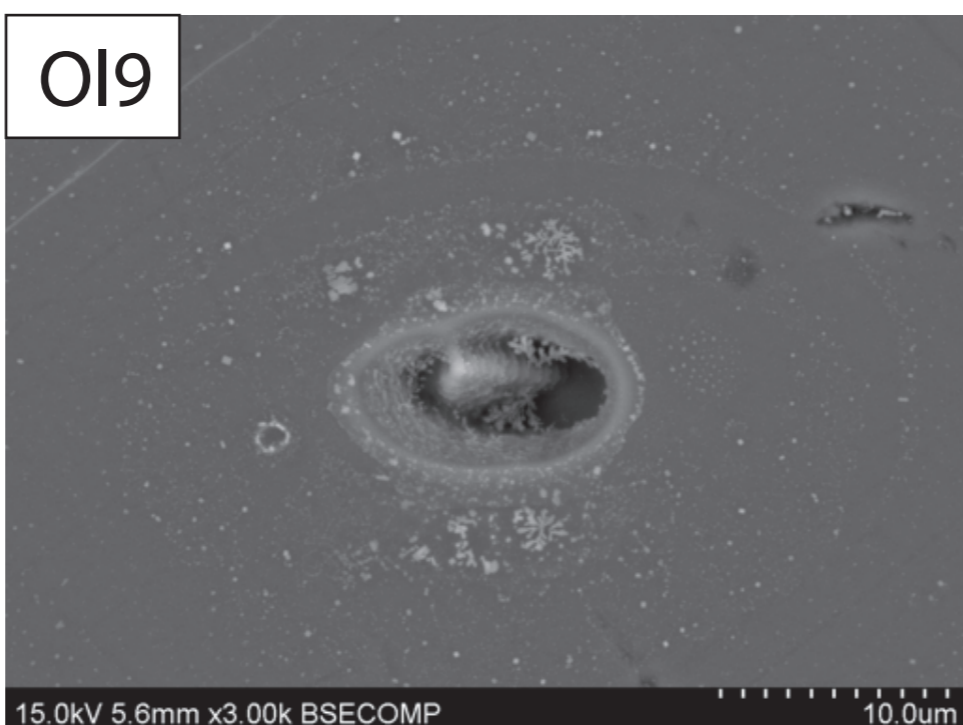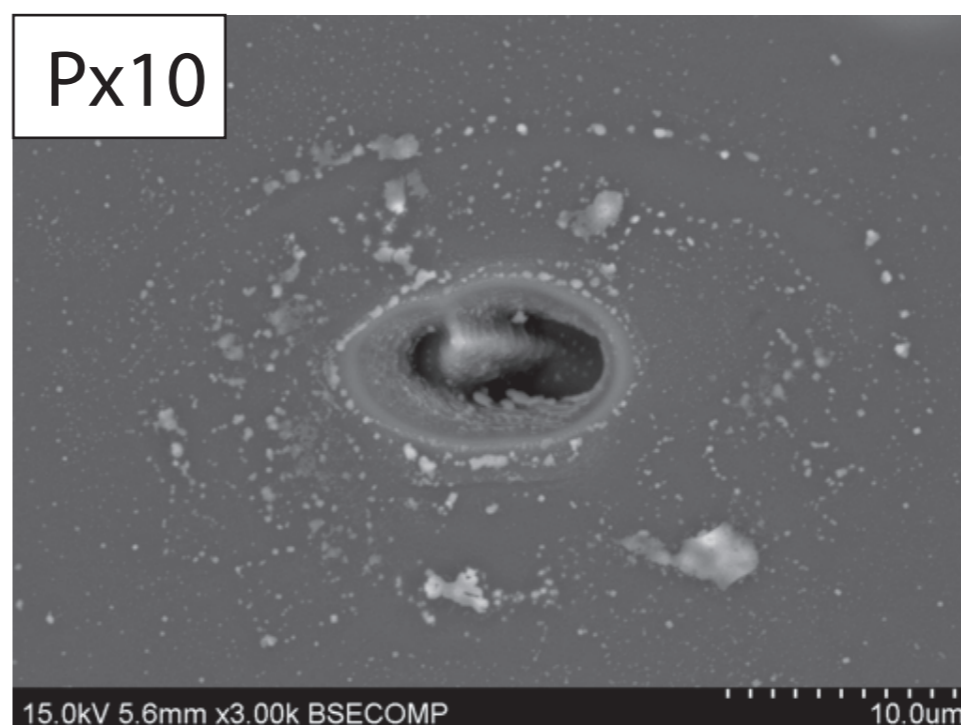

Ol-Px Al-Mg spots:

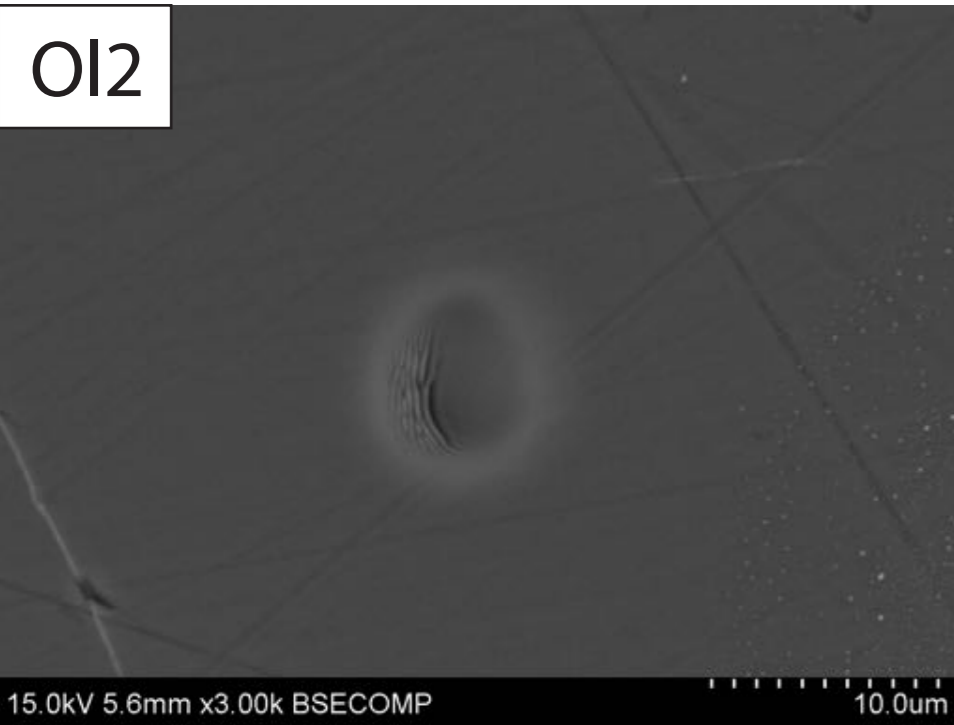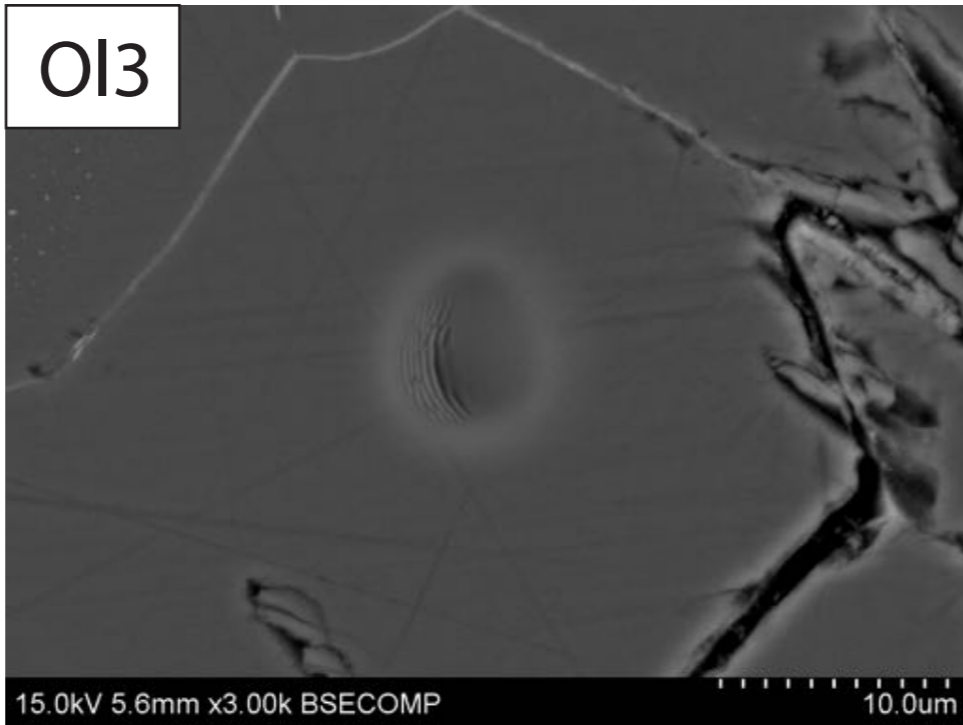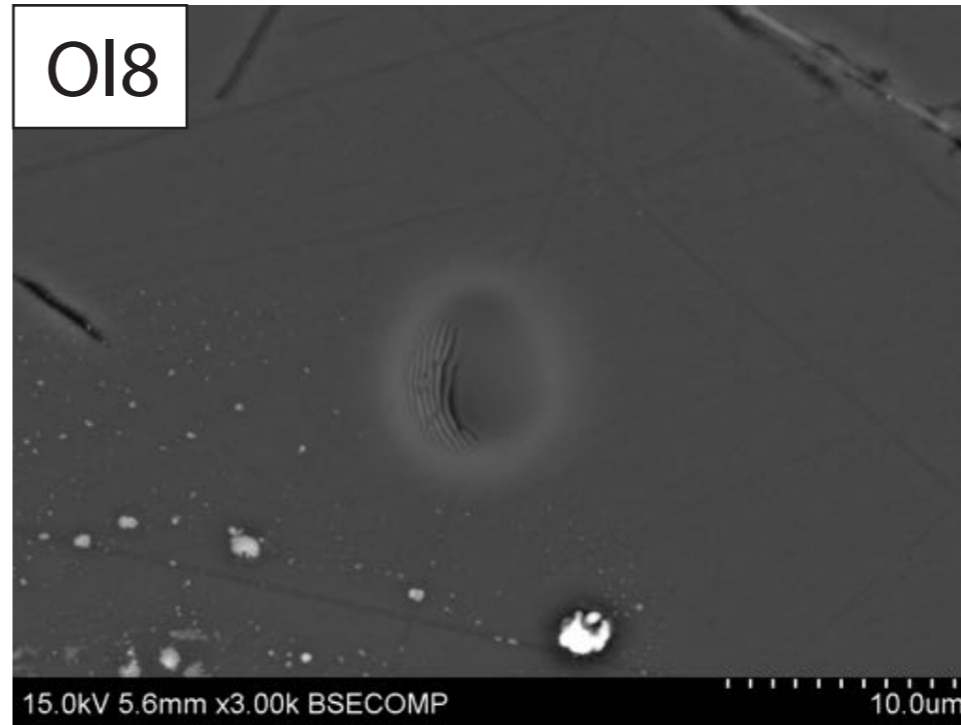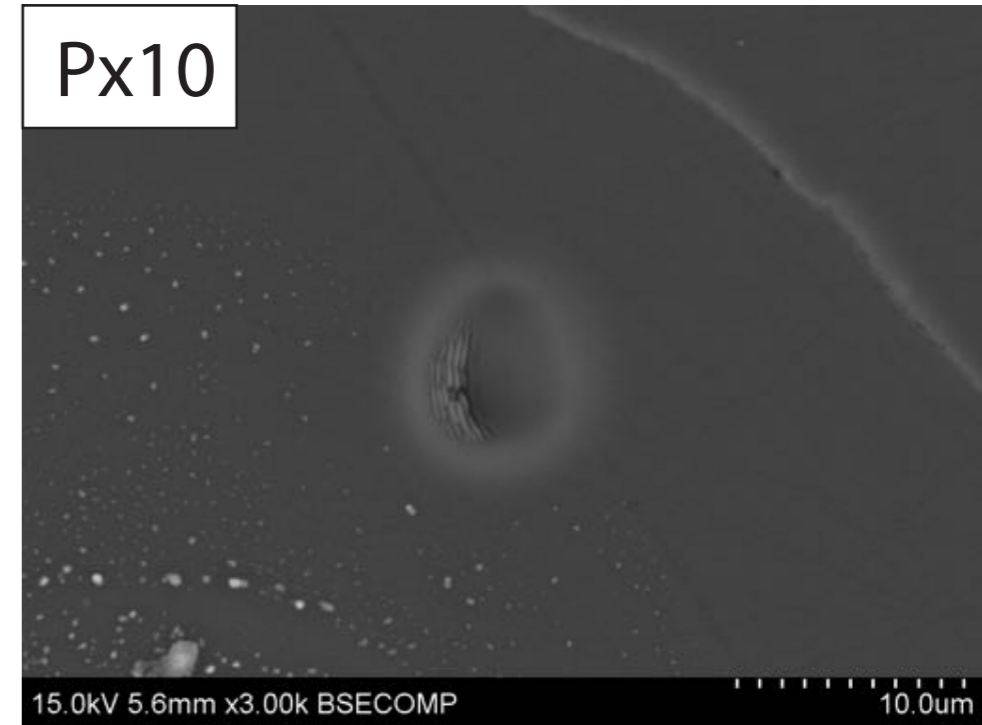

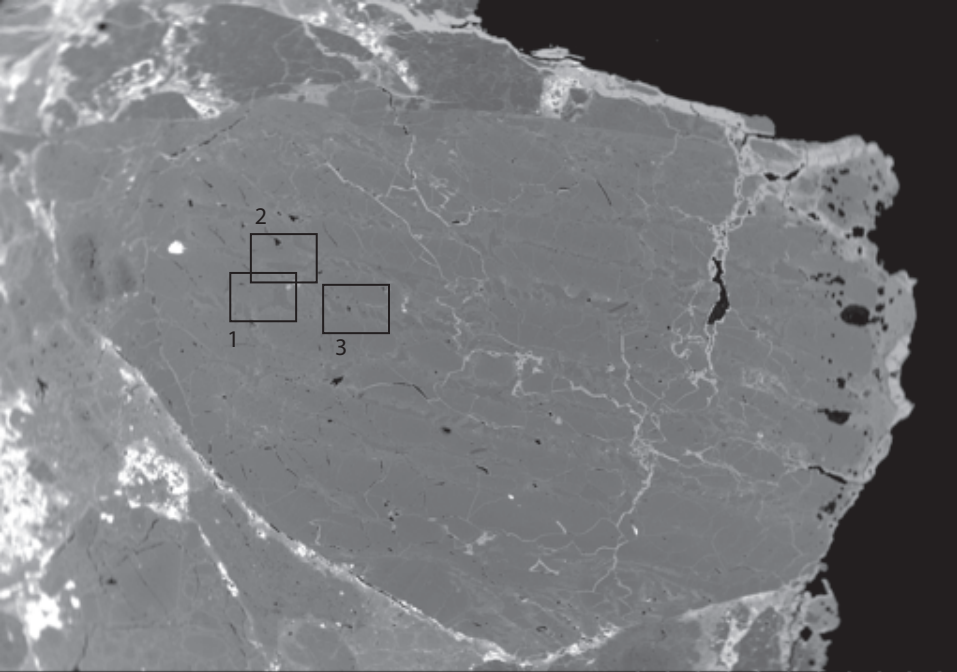

1

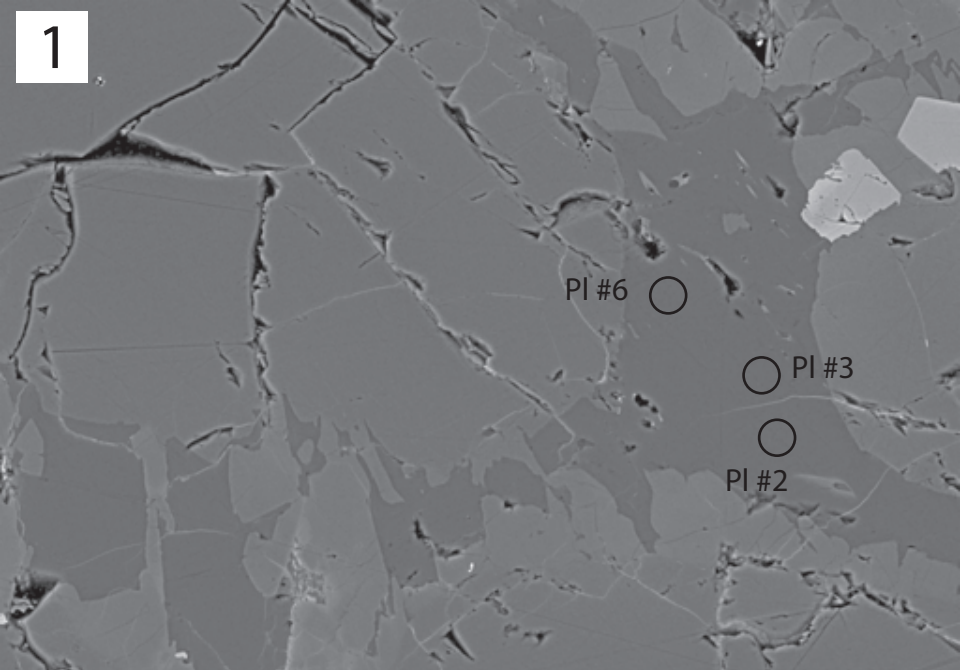

PI #6 ○

○ PI #3

○  
PI #2

2

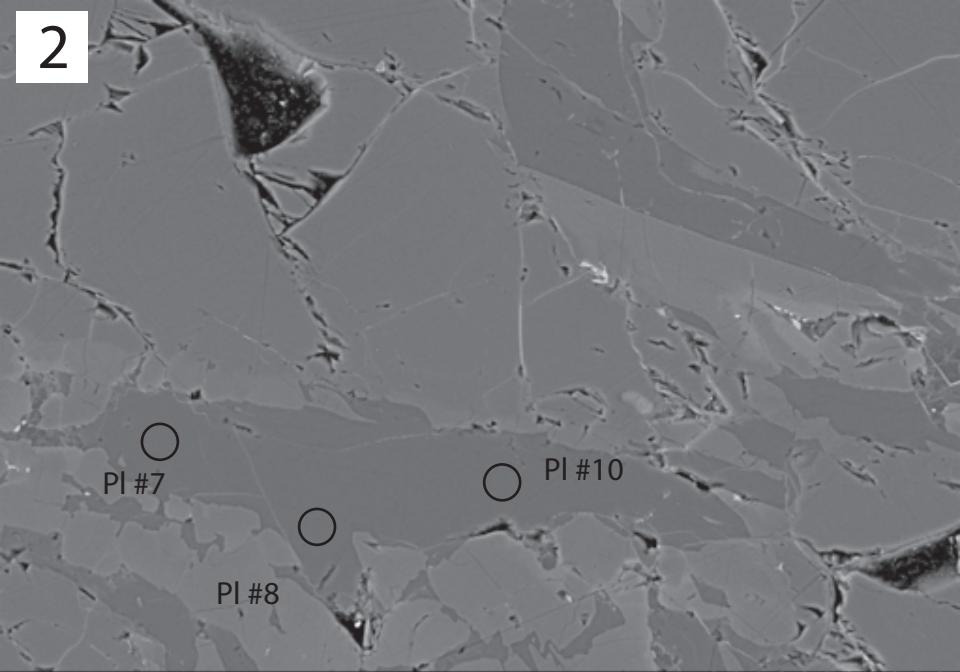

15.0kV x600 BSE3D

50.0um

3

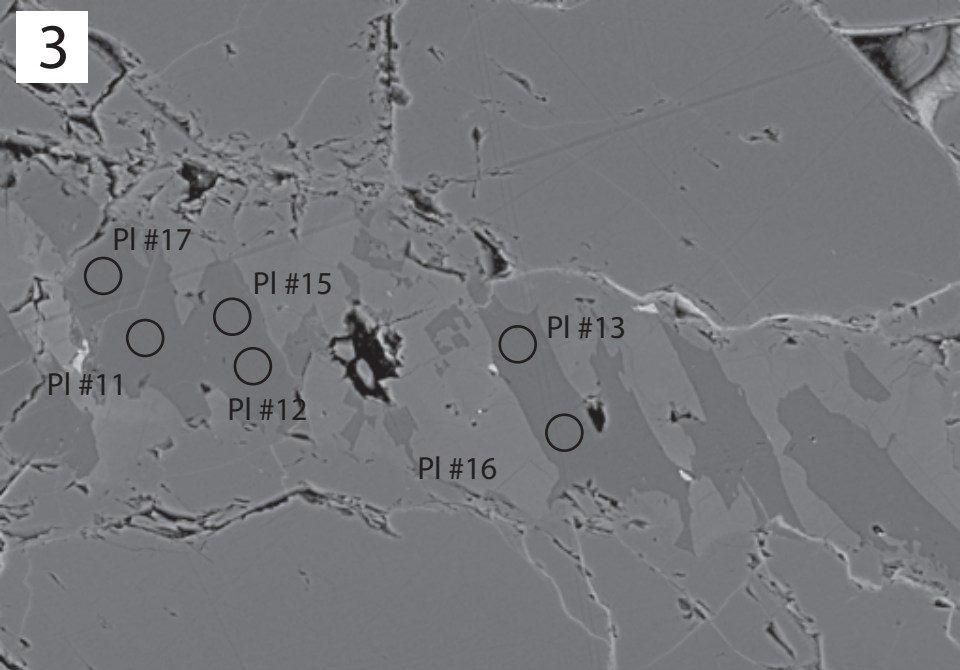

PI #17

PI #15

PI #13

PI #11

PI #12

PI #16

# An Al-Mg spots:

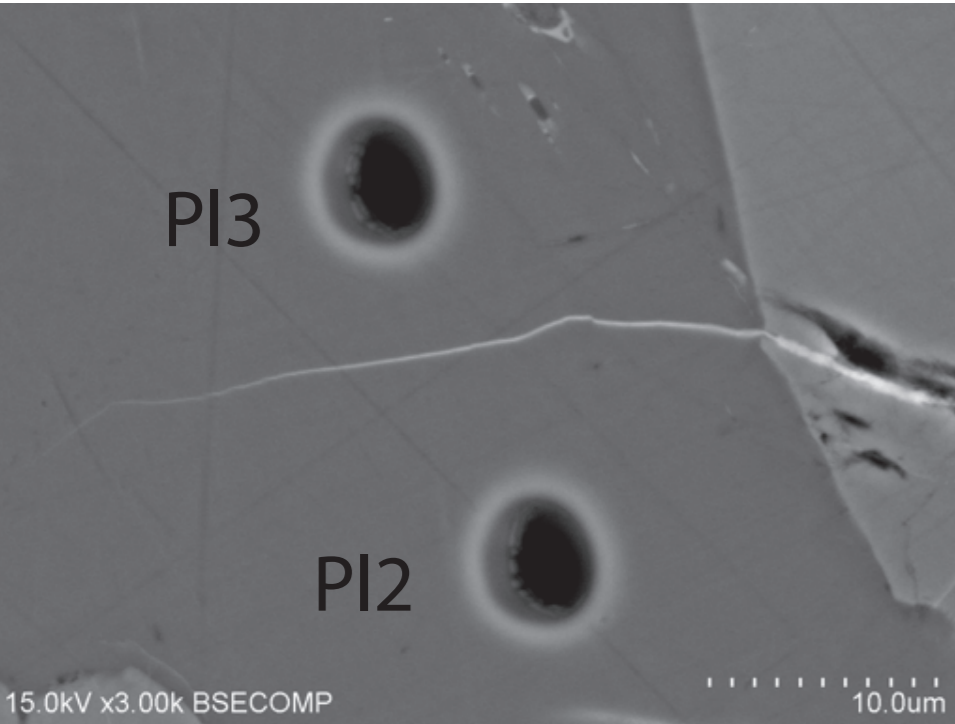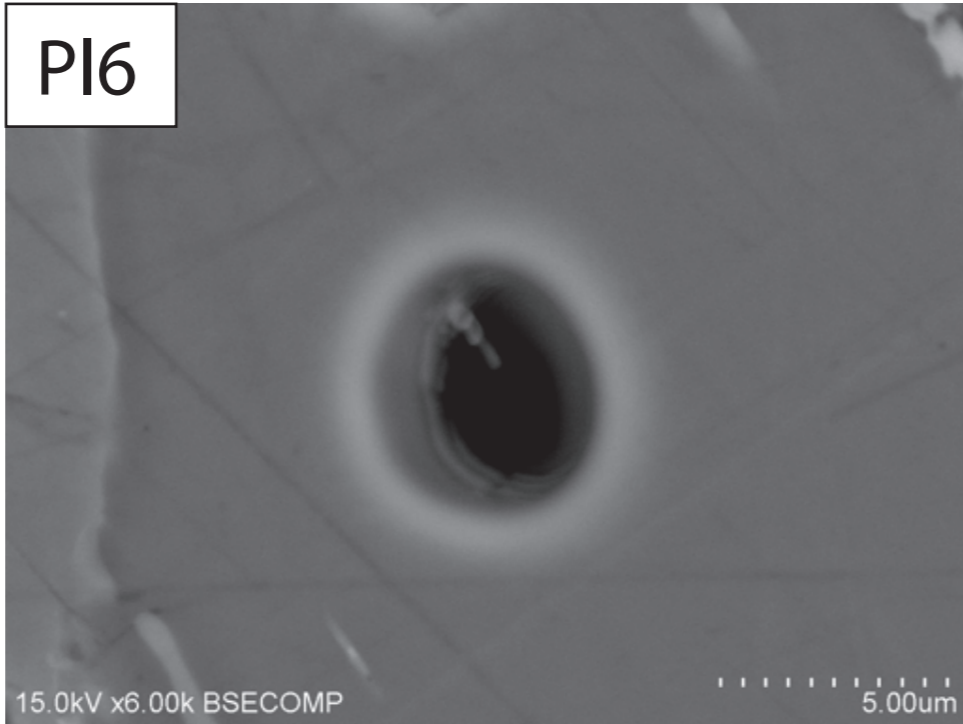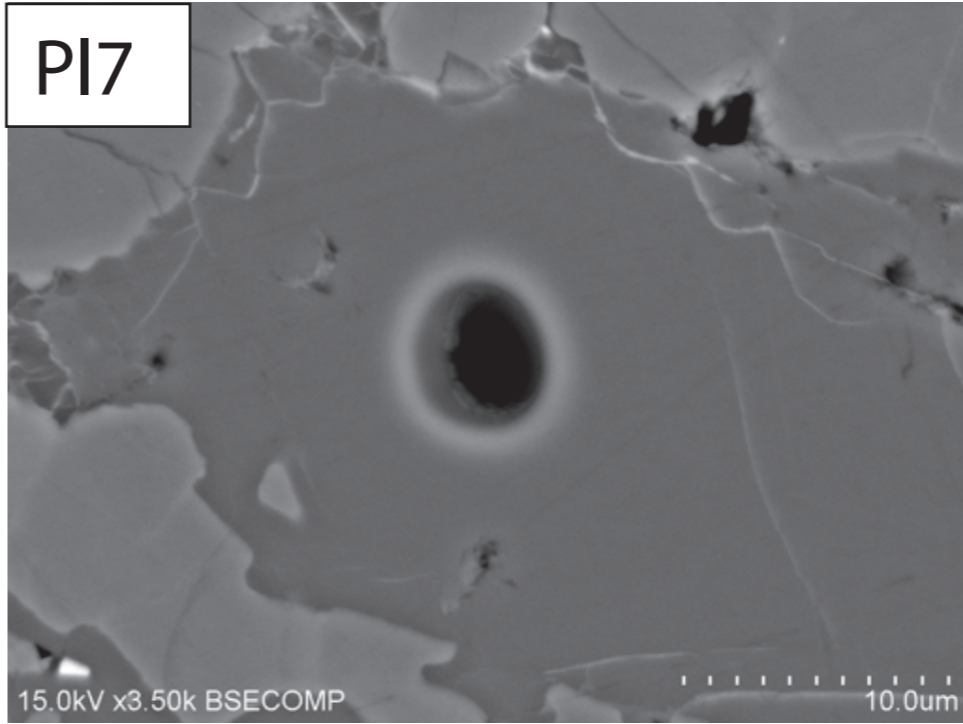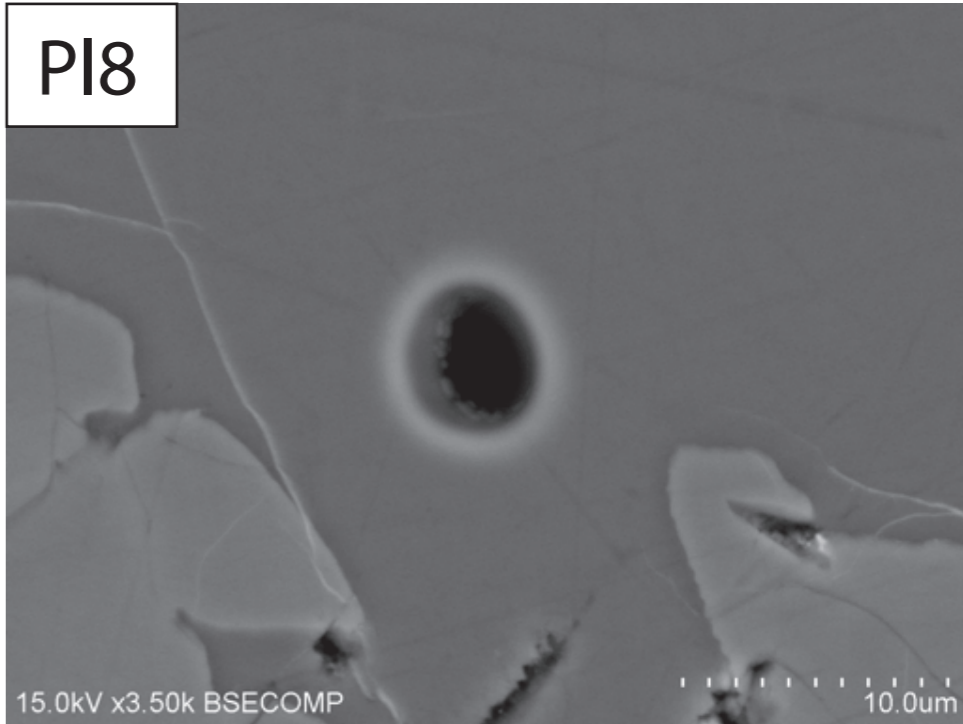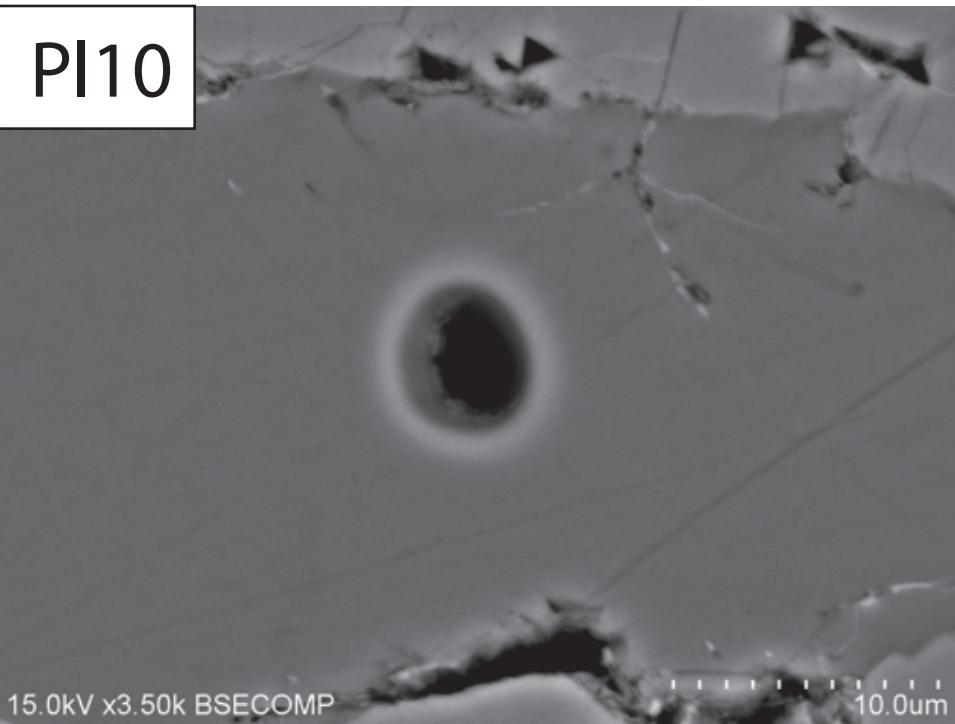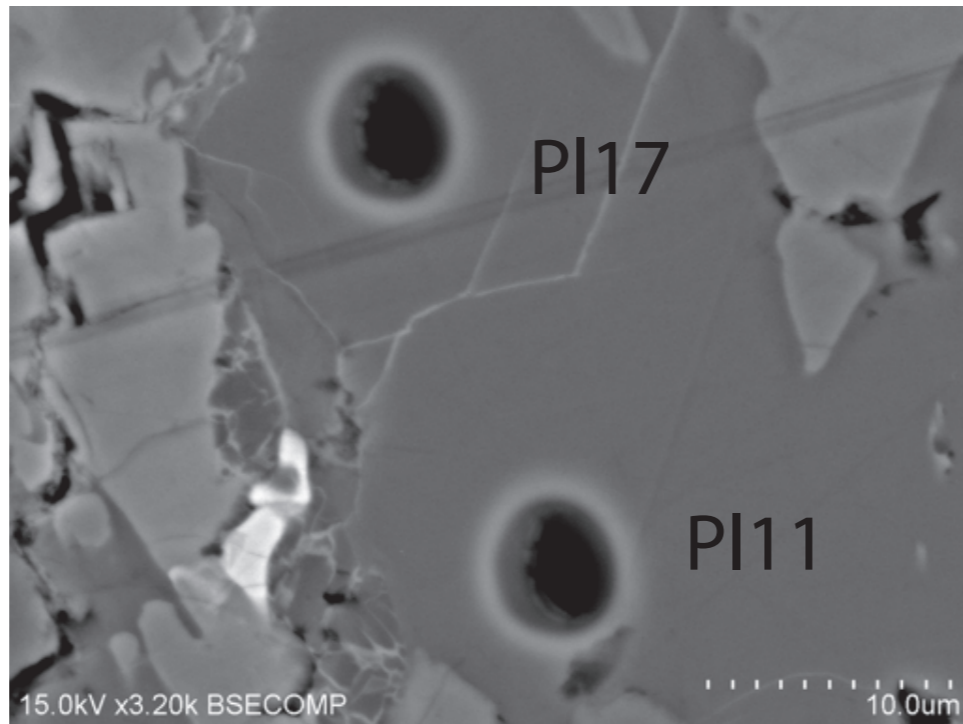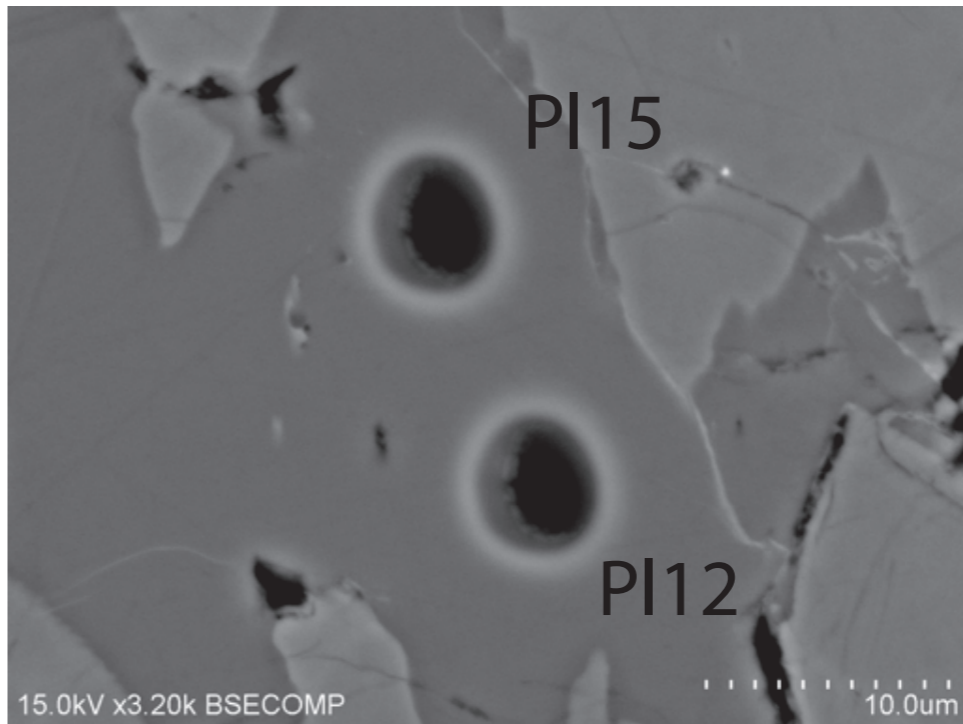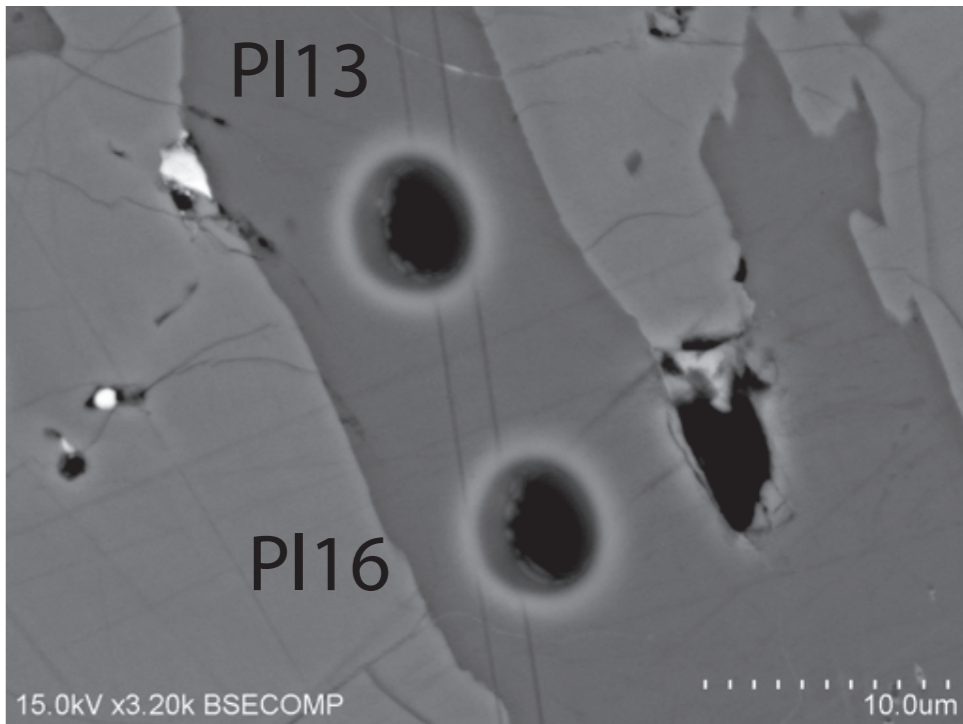

Supplement: NIHMS1757327-supplement-EA6-7.pdf [file NIHMS1757327-supplement-EA6-7.pdf]
