# Supplementary material
Source: PubMed Central journal article supplement (PMC8740609)

Electronic Annex EA 6-8: Location of SIMS analyses for MET 00452 c111  
New constraints from  $^{26}\text{Al}$ - $^{26}\text{Mg}$  chronology of anorthite  
bearing chondrules in unequilibrated ordinary chondrites  
*Guillaume Siron, Kohei Fukuda, Makoto Kimura, and Noriko T. Kita*

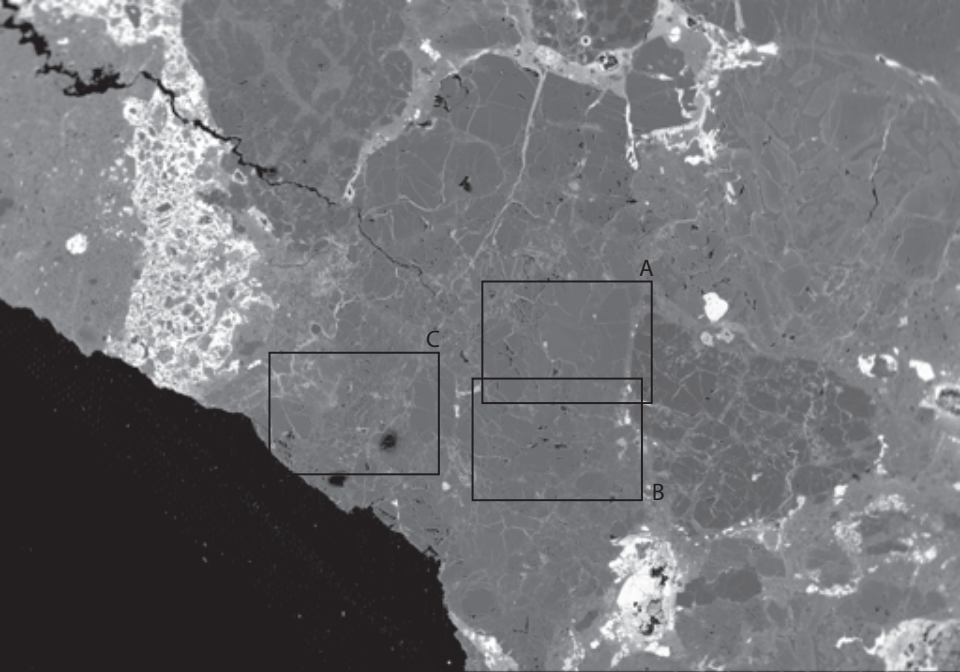

15.0kV x70 BSE3D

500um

A

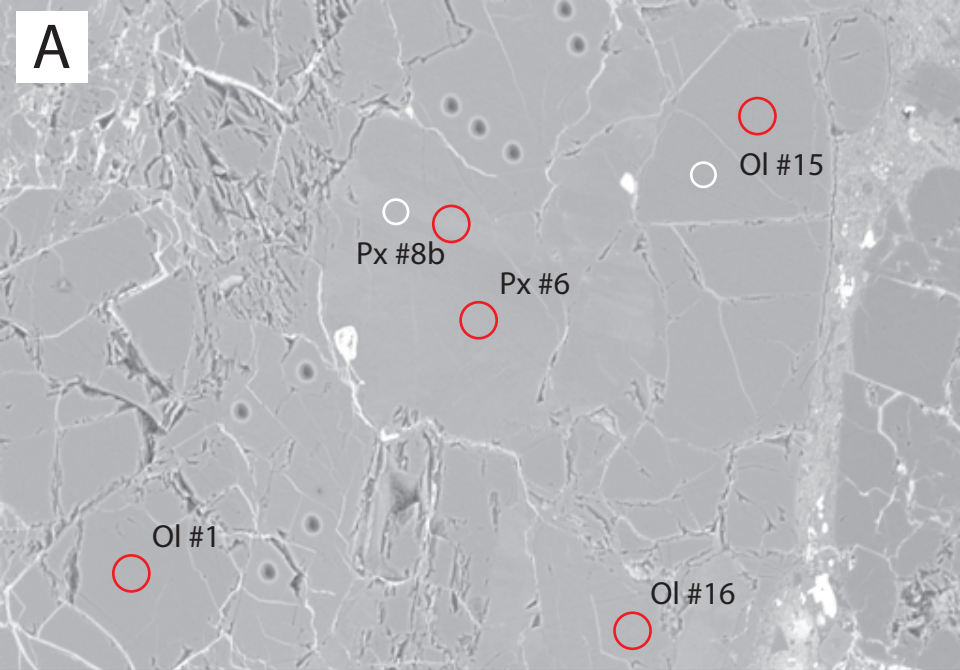

Px #8b

Px #6

Ol #15

Ol #1

Ol #16

**B**

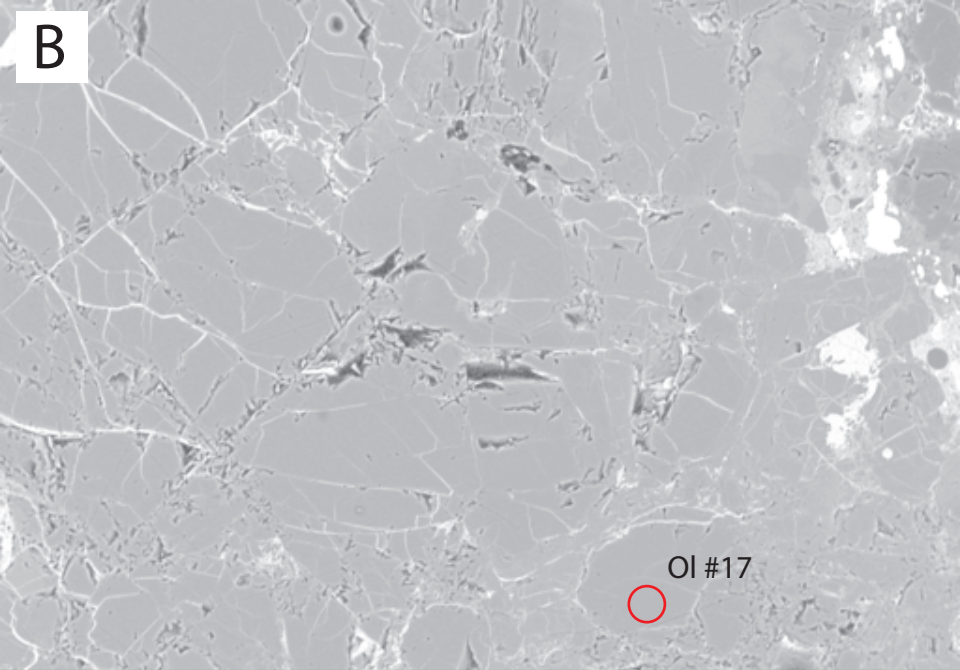

OI #17

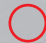

C

Ol #3

Ol #2

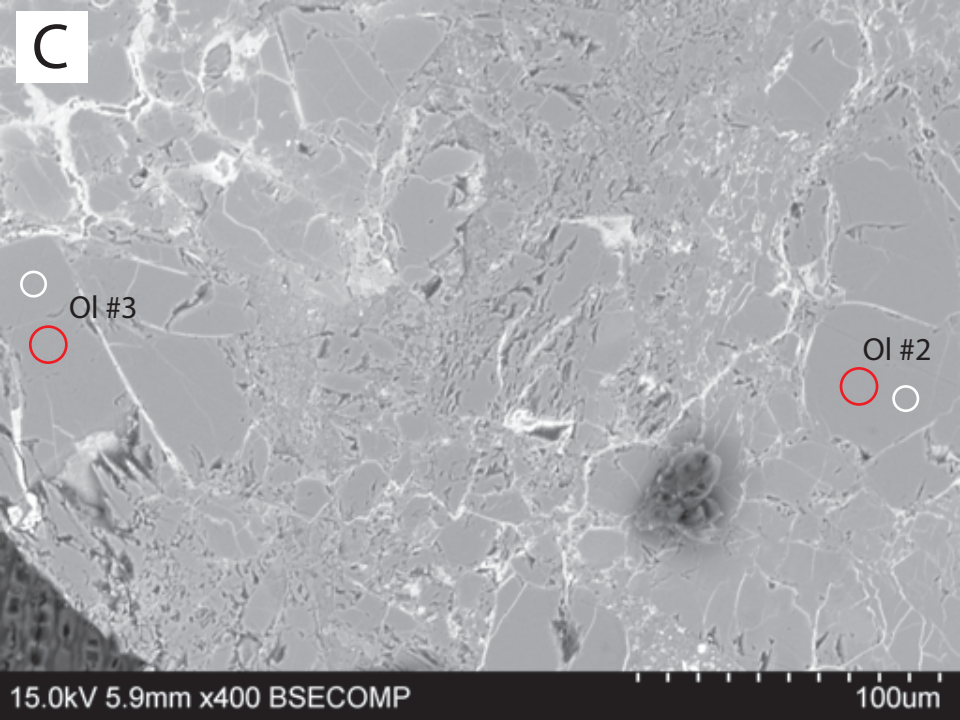

Ol-Px oxygen spots:

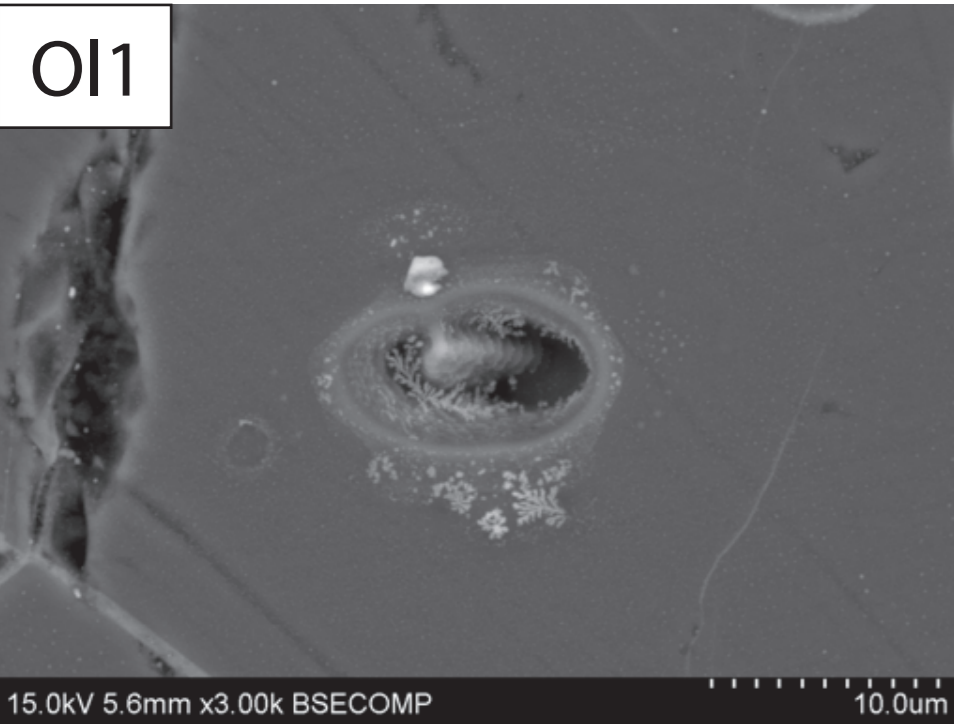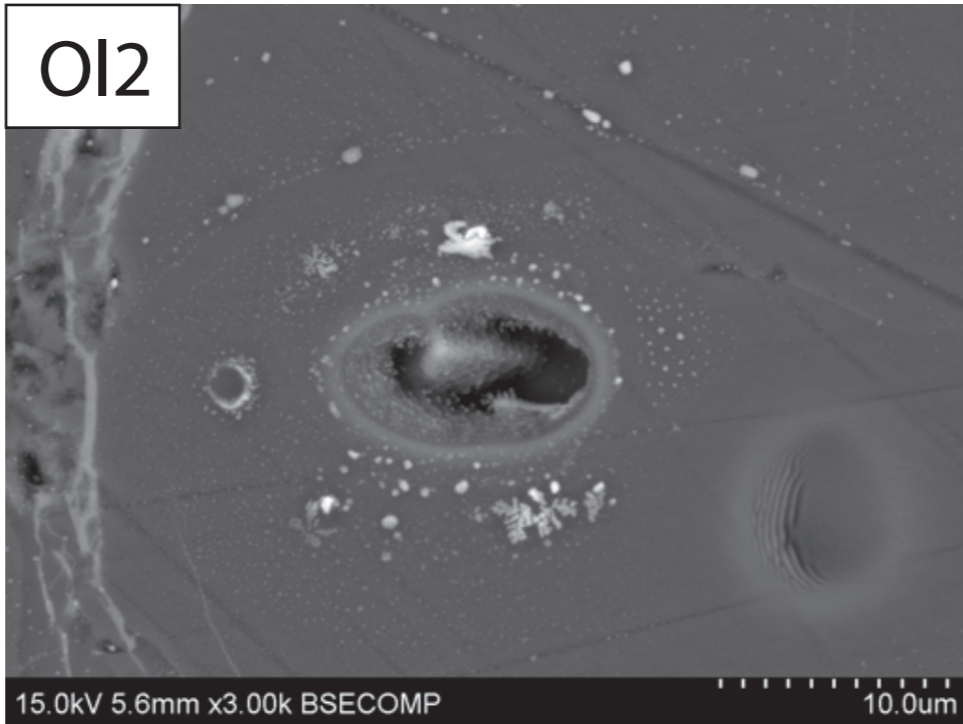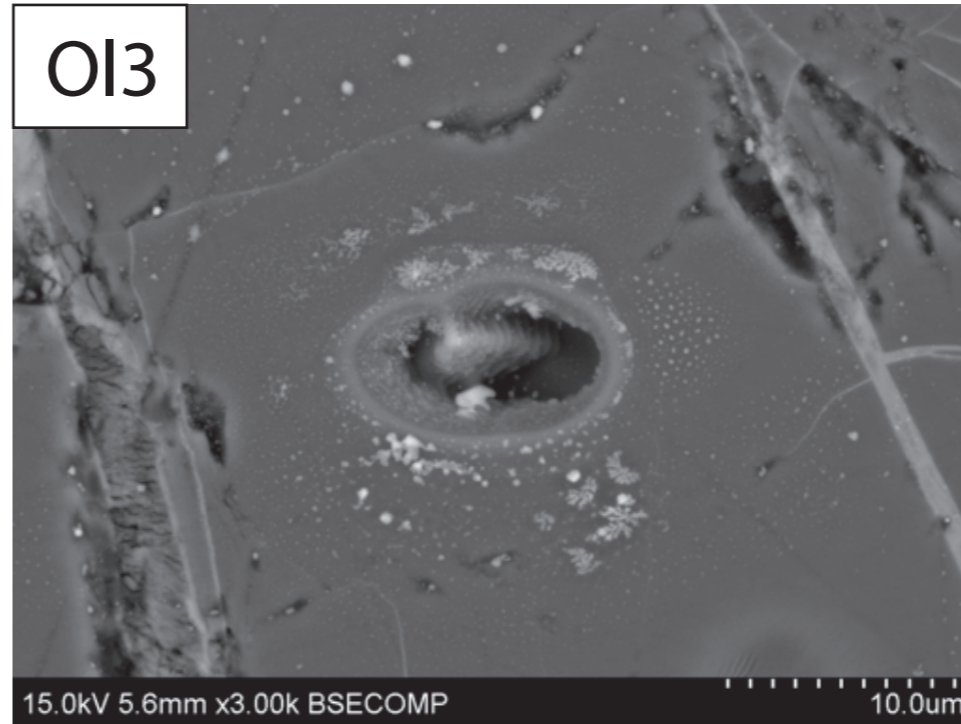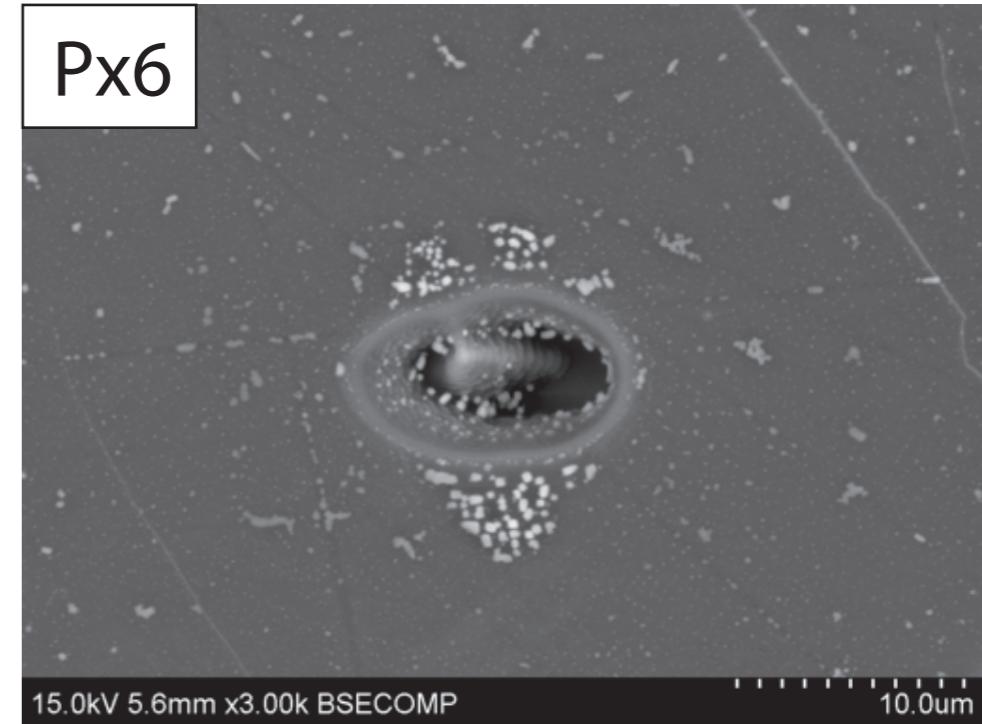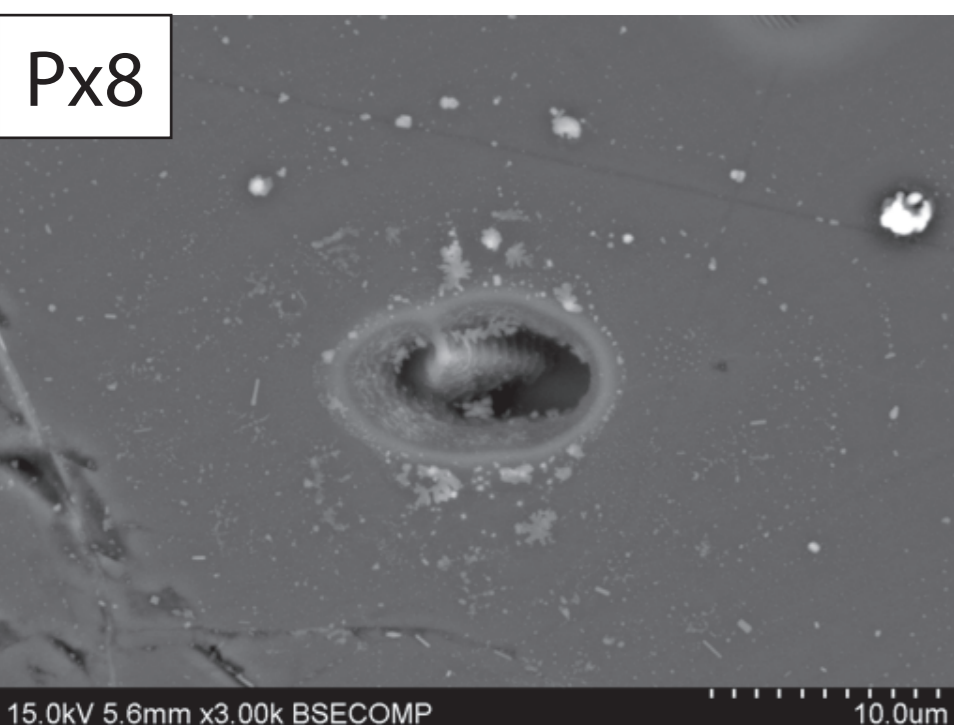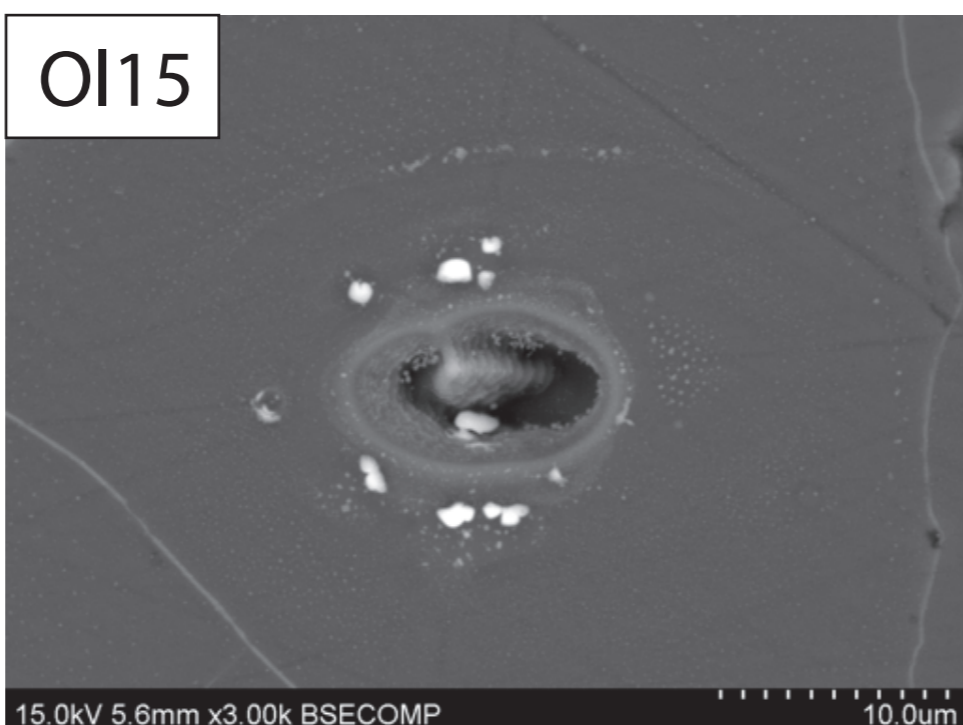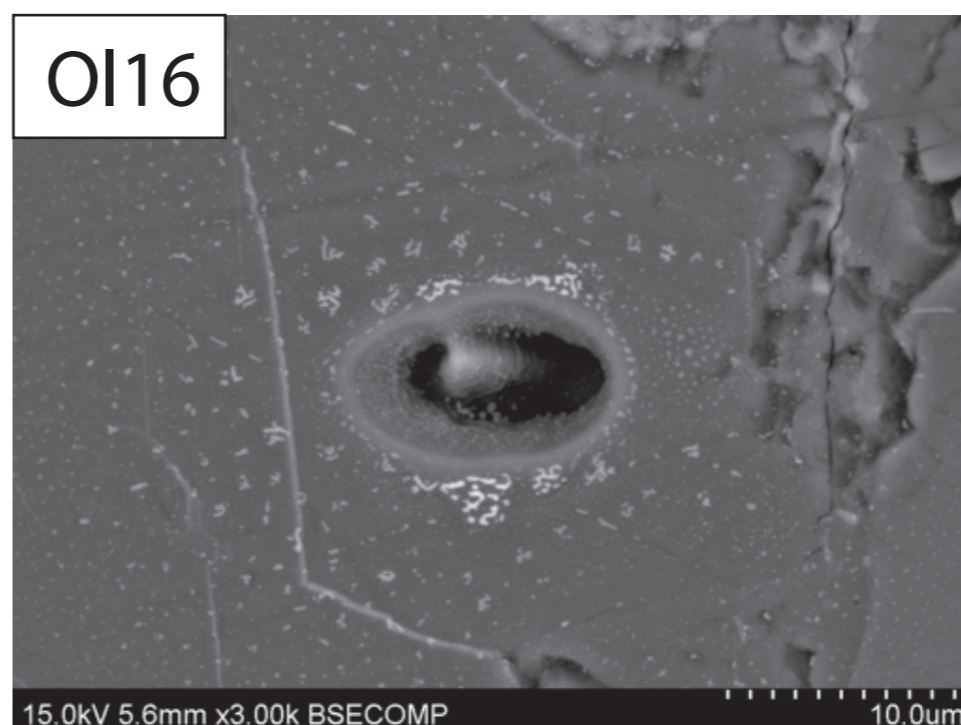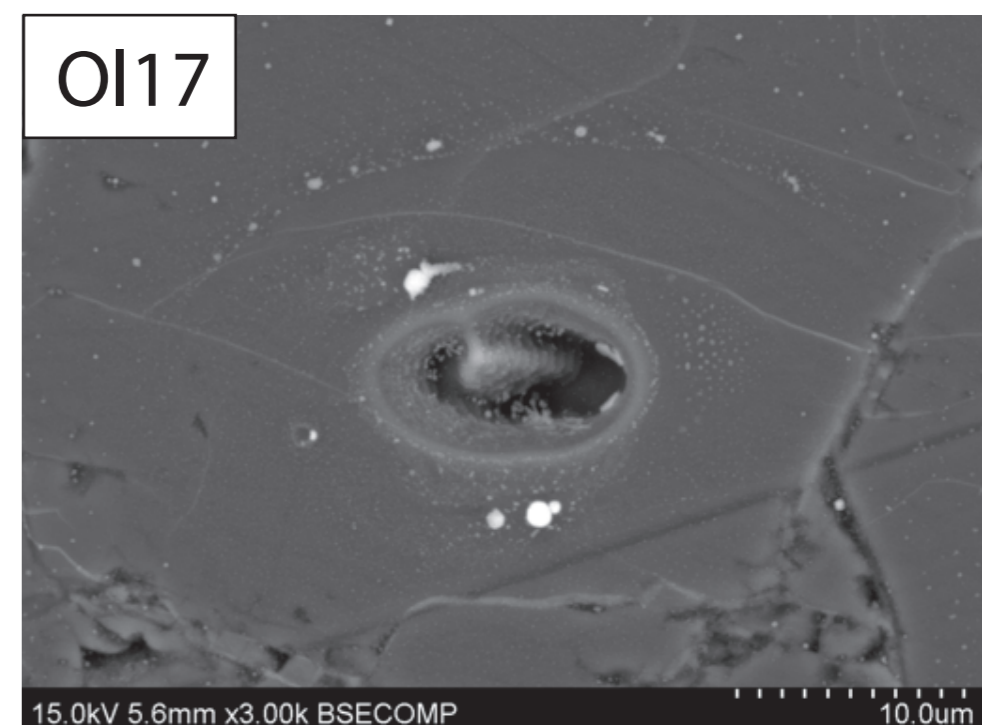

Ol-Px Al-Mg spots:

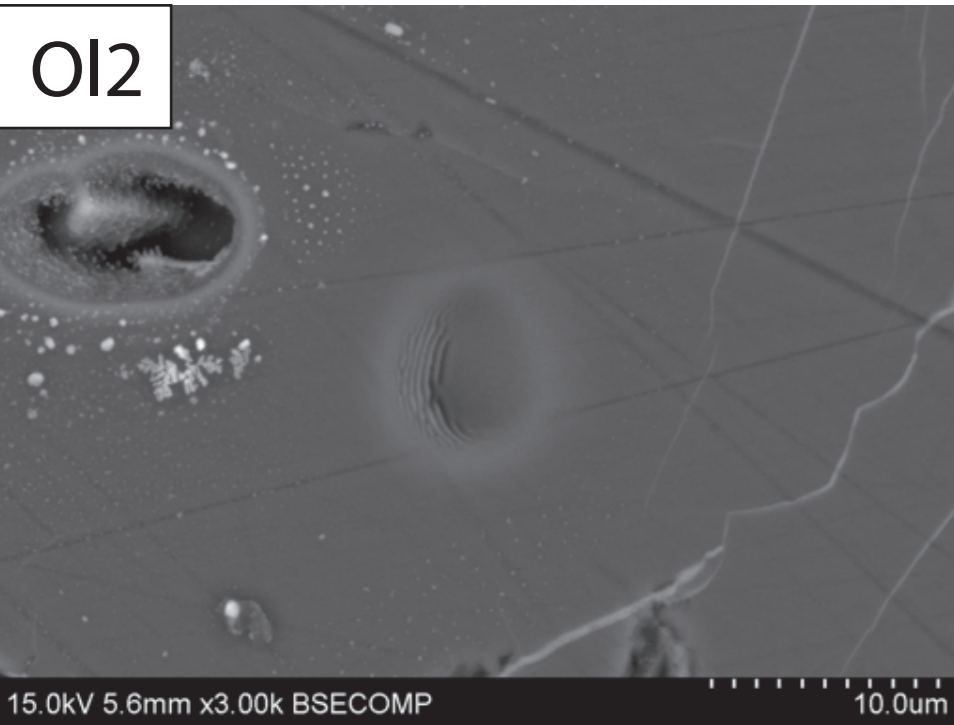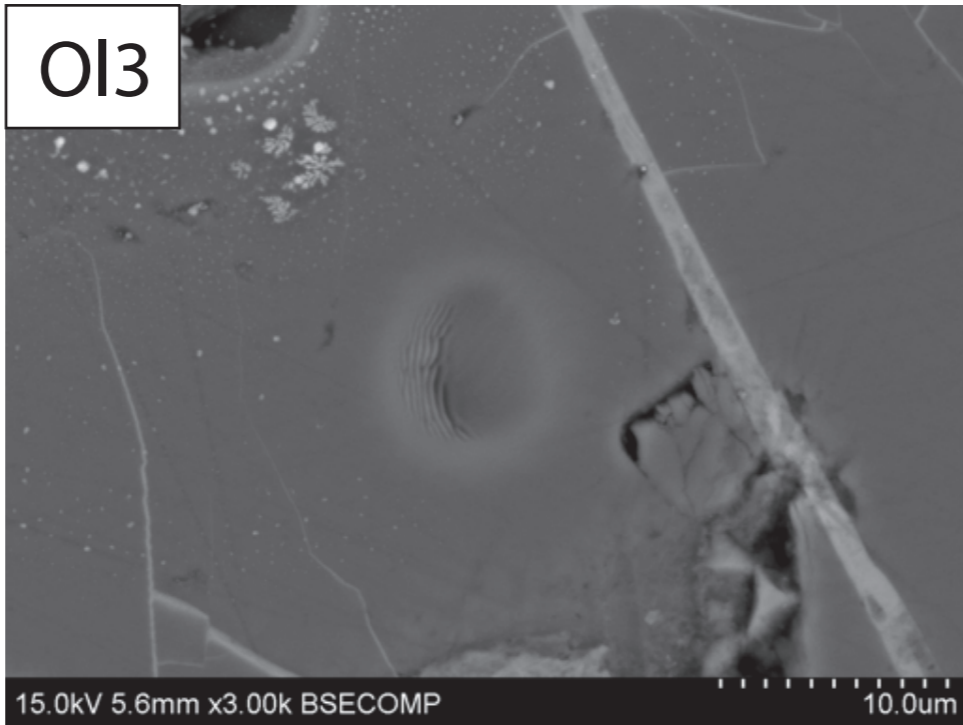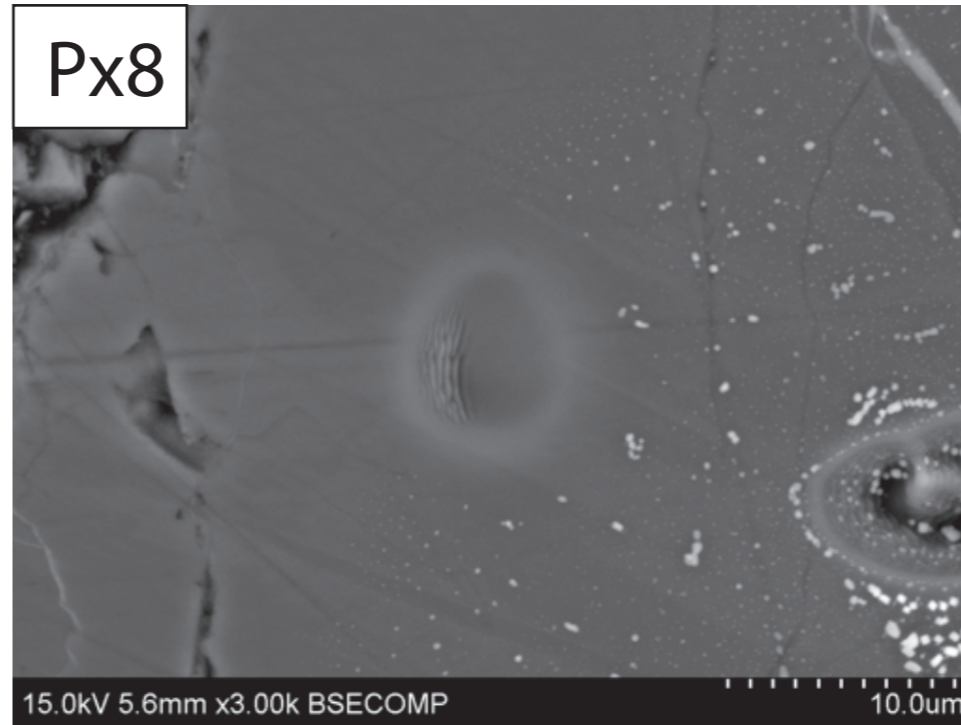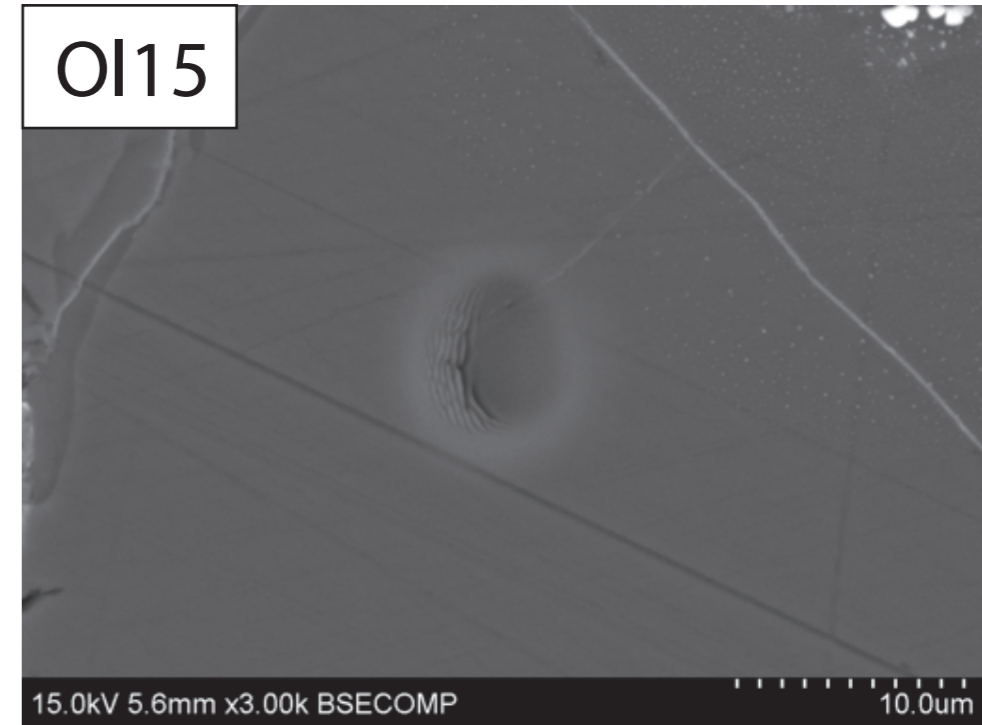

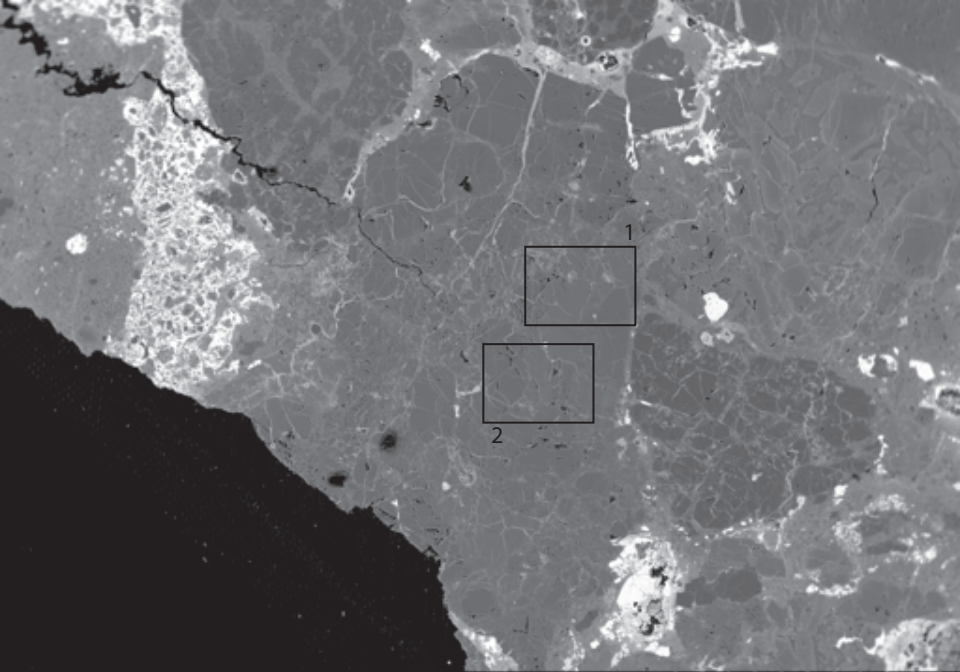

15.0kV x70 BSE3D

500um

1

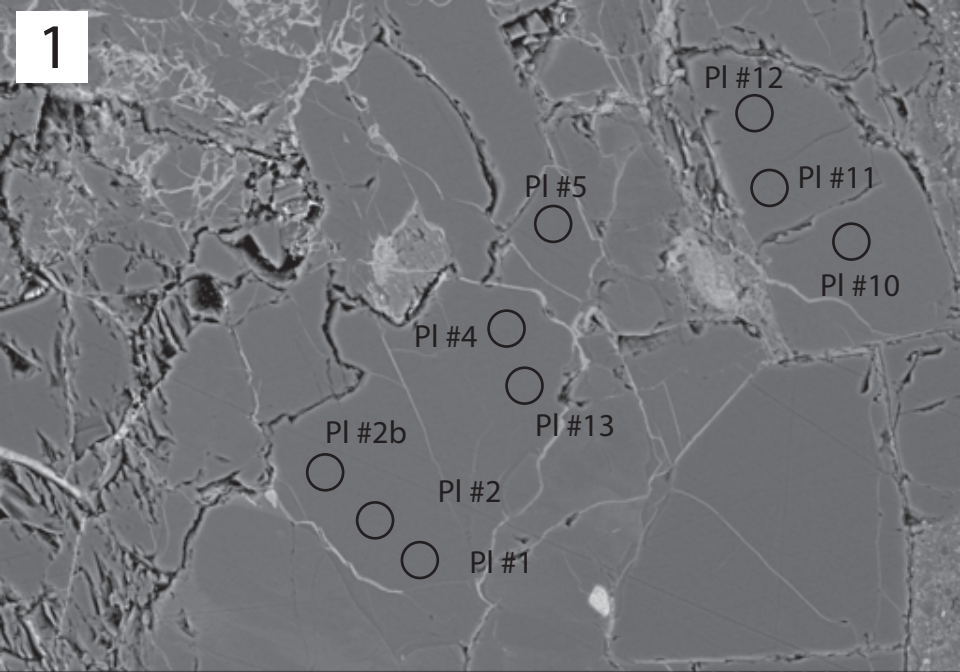



2

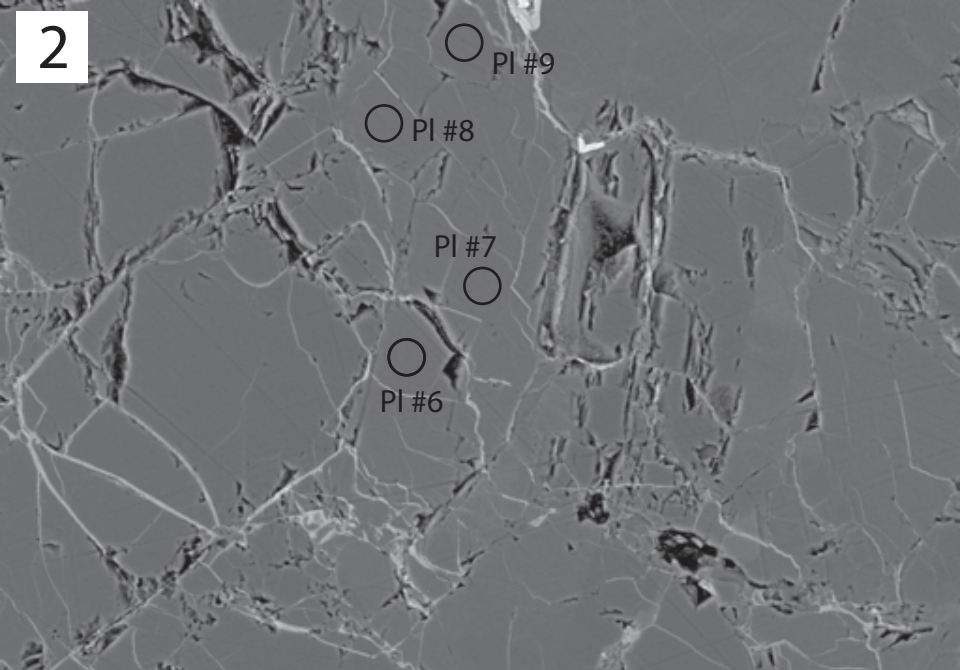

# An Al-Mg spots:

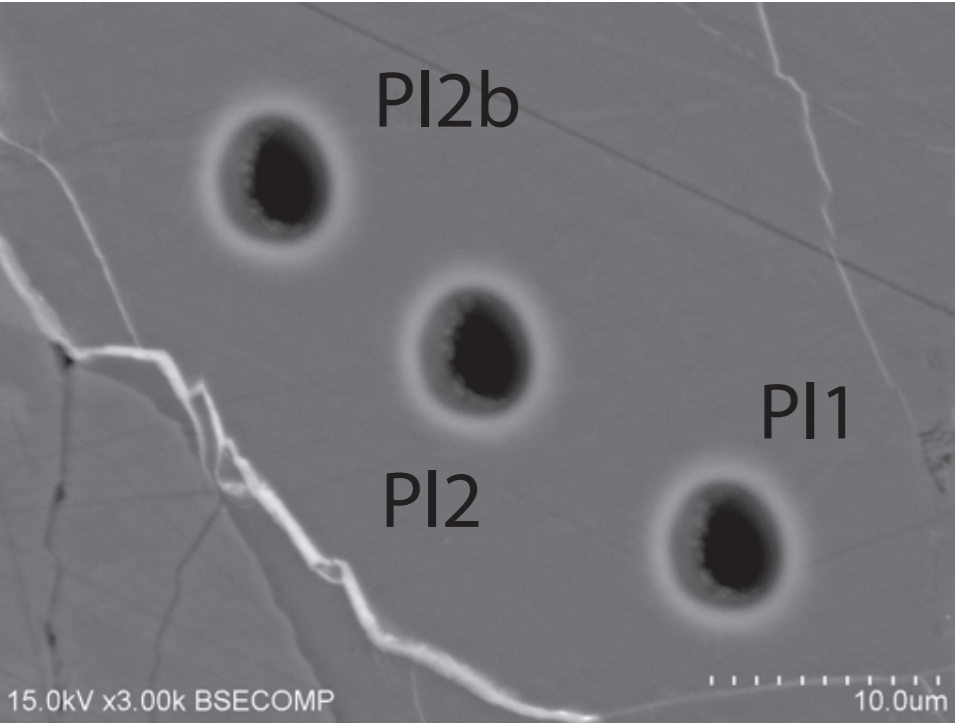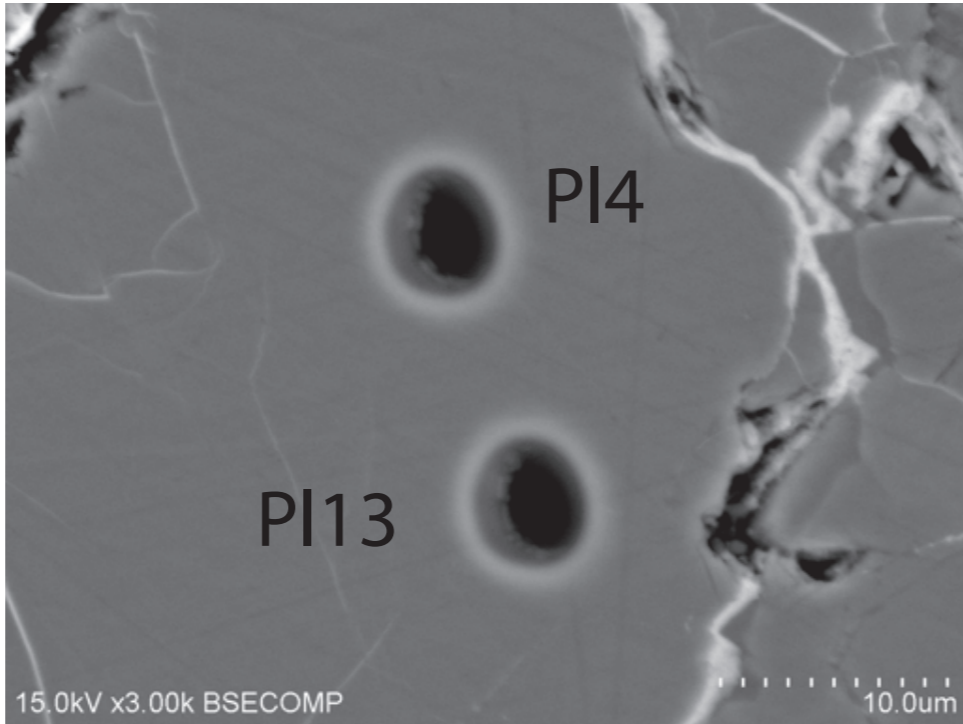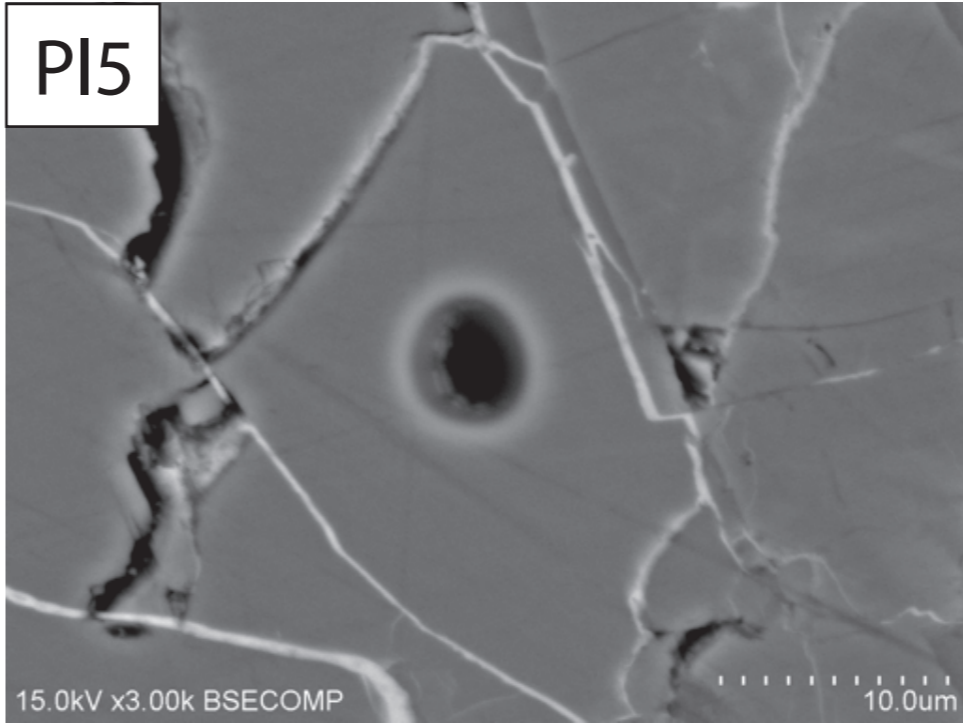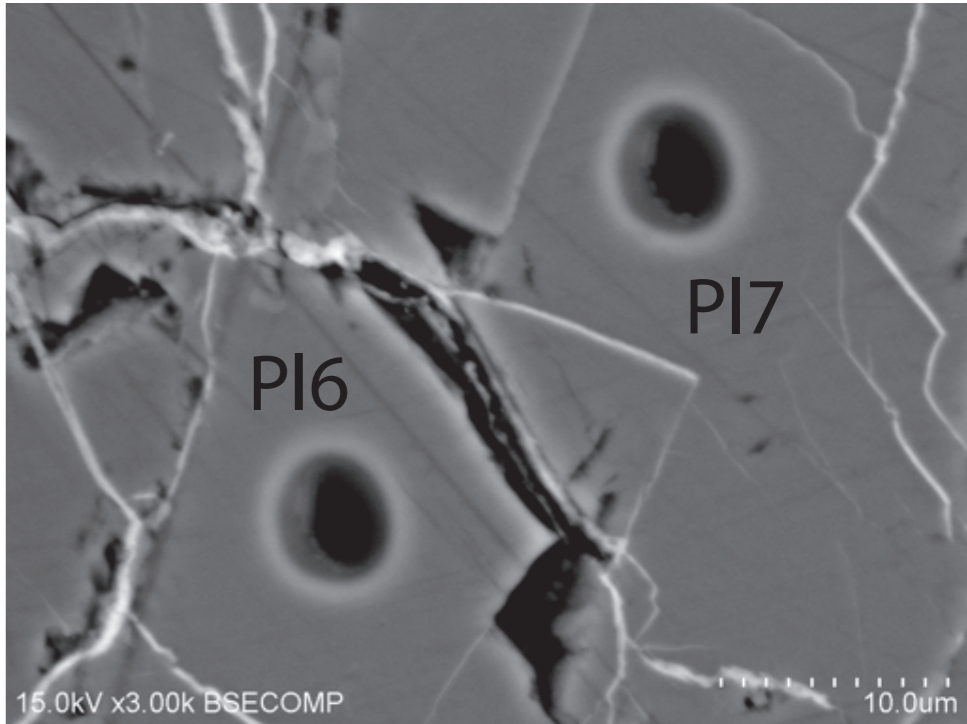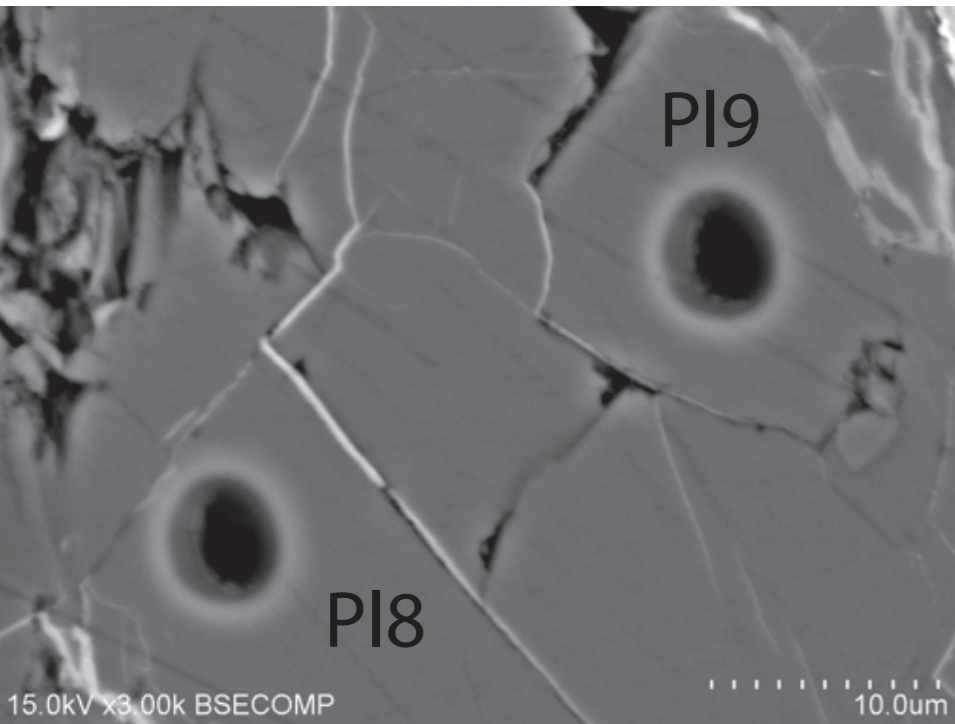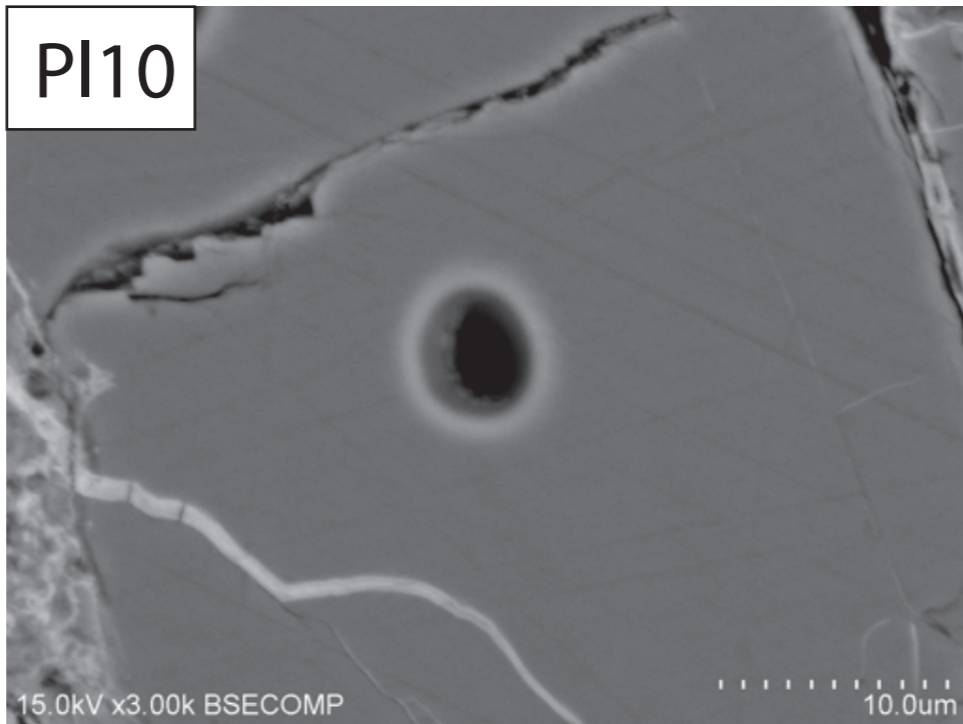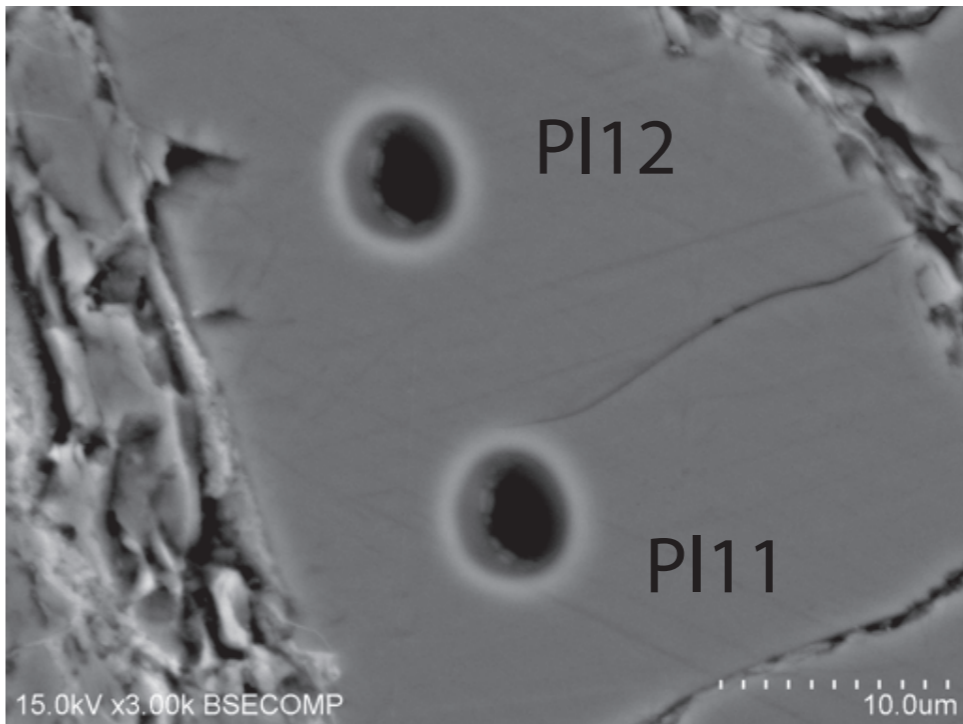

Supplement: NIHMS1757327-supplement-EA6-8.pdf [file NIHMS1757327-supplement-EA6-8.pdf]
