# Supplementary material
Source: PubMed Central journal article supplement (PMC8740609)

Electronic Annex EA 6-9: Location of SIMS analyses for Semarkona c34  
New constraints from  $^{26}\text{Al}$ - $^{26}\text{Mg}$  chronology of anorthite  
bearing chondrules in unequilibrated ordinary chondrites  
*Guillaume Siron, Kohei Fukuda, Makoto Kimura, and Noriko T. Kita*

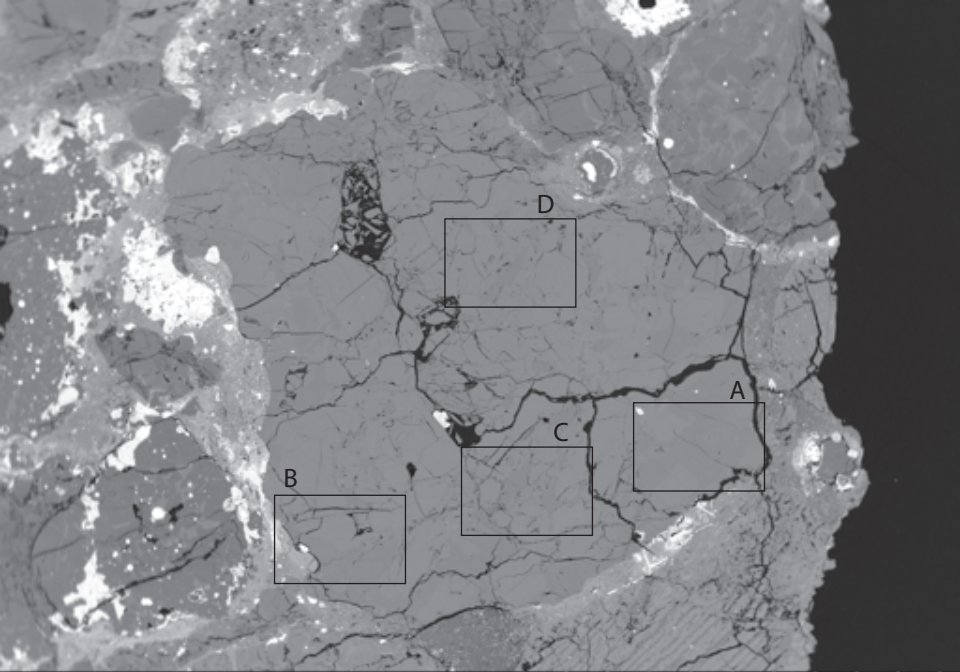

A

Ol #6

Px #5

100um

15.0kV 6.2mm x400 BSECOMP

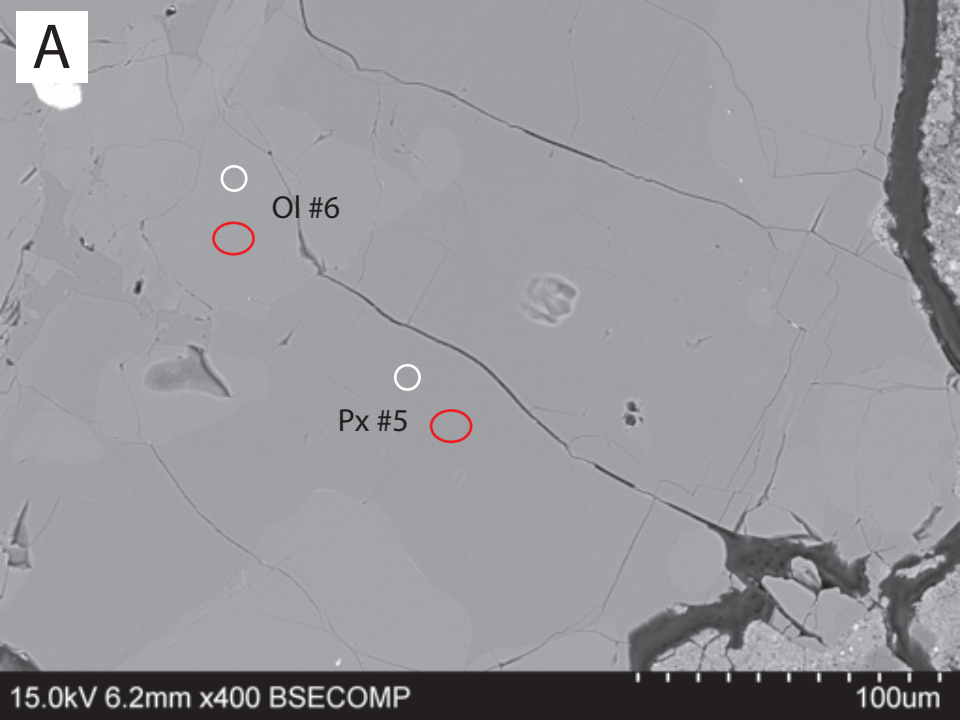

**B**

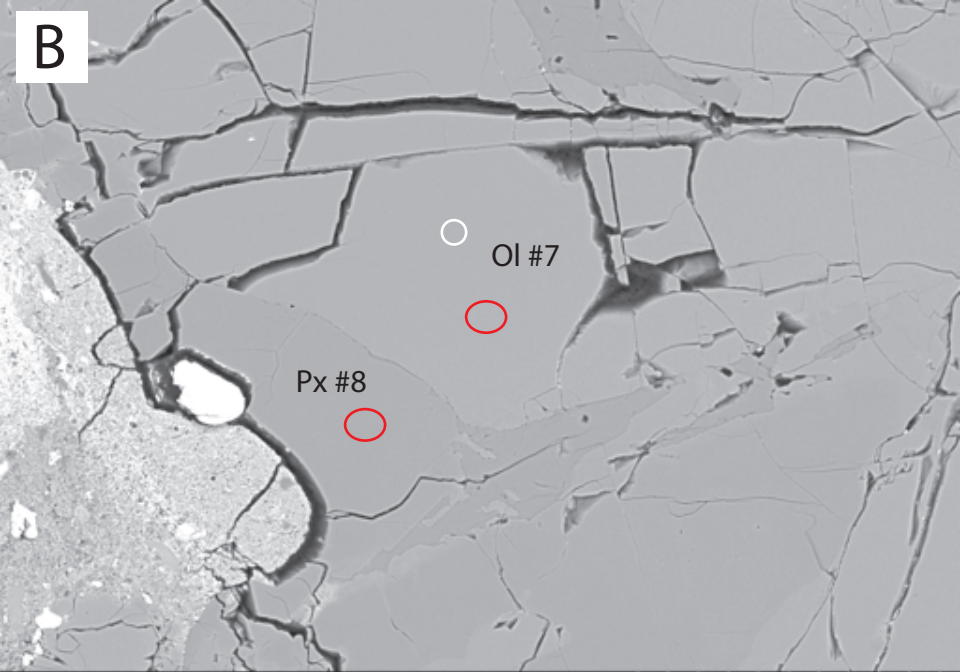

Px #8

Ol #7

C

Ol #3

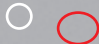

Ol #4

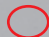

D

Ol #2

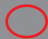

Ol #1

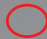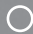

Ol-Px oxygen spots:

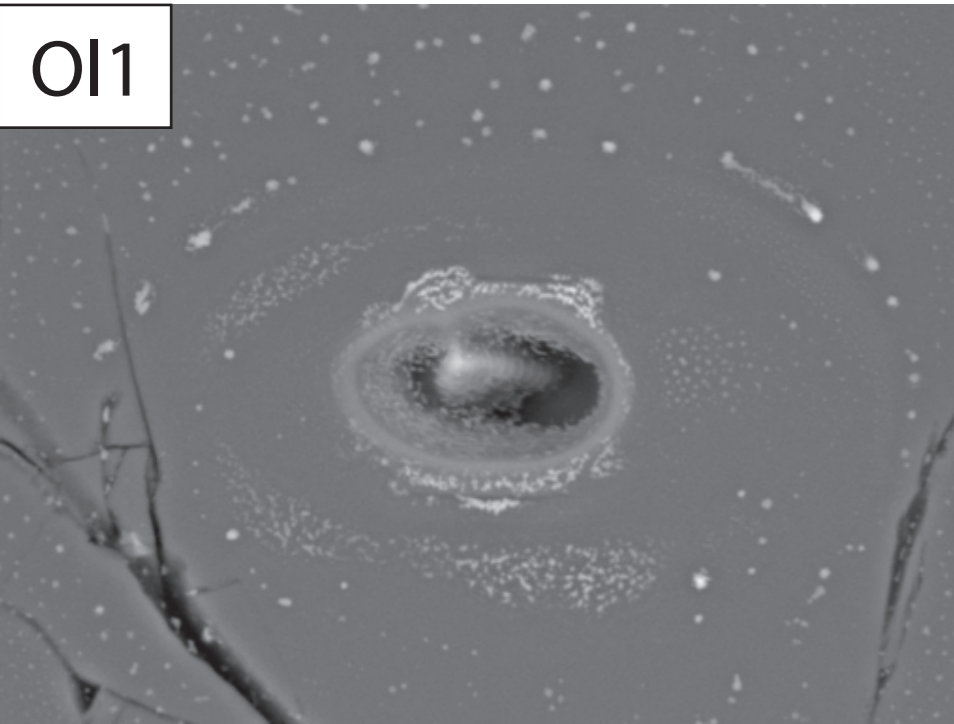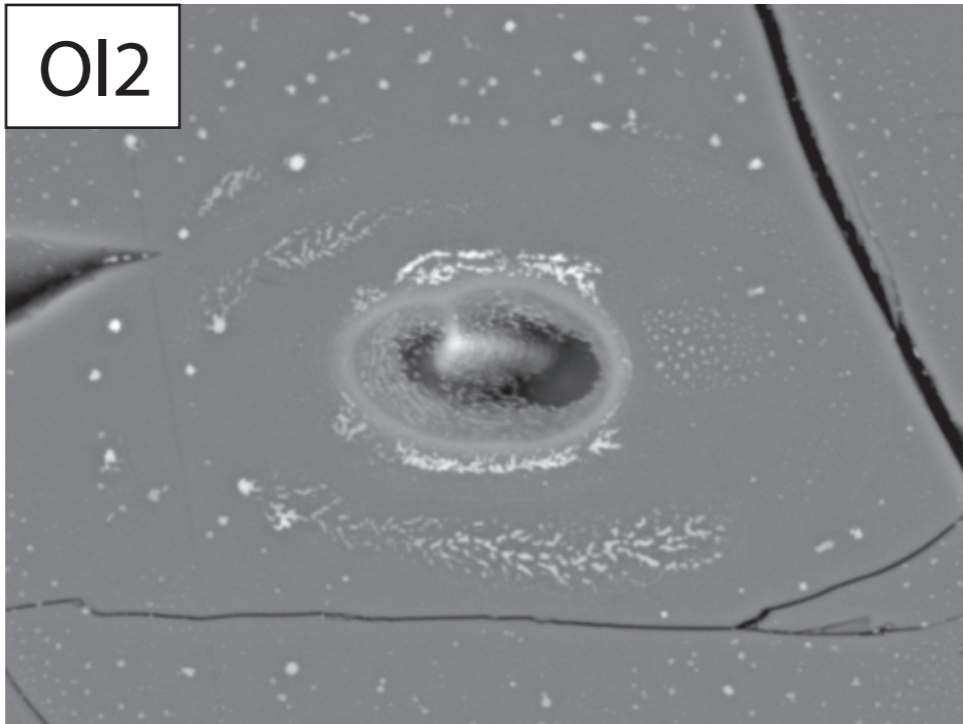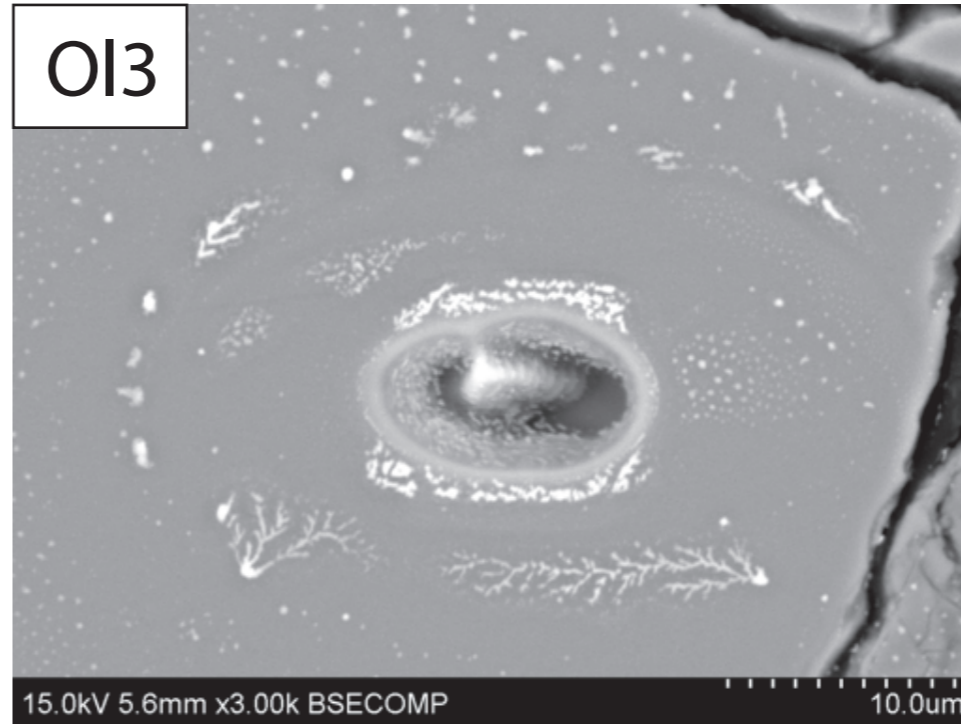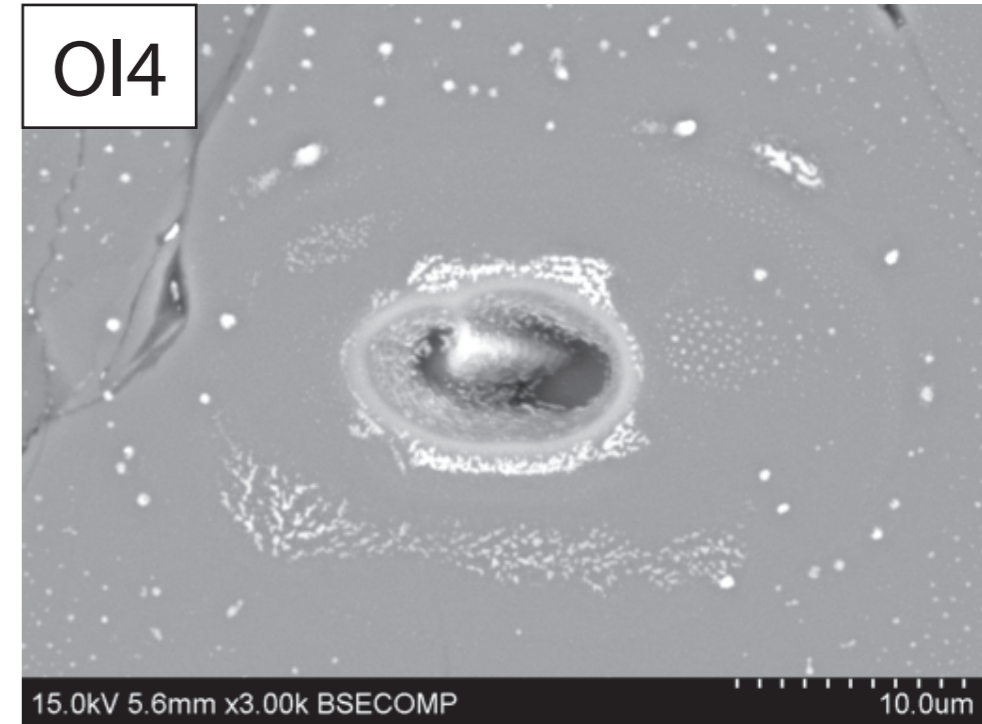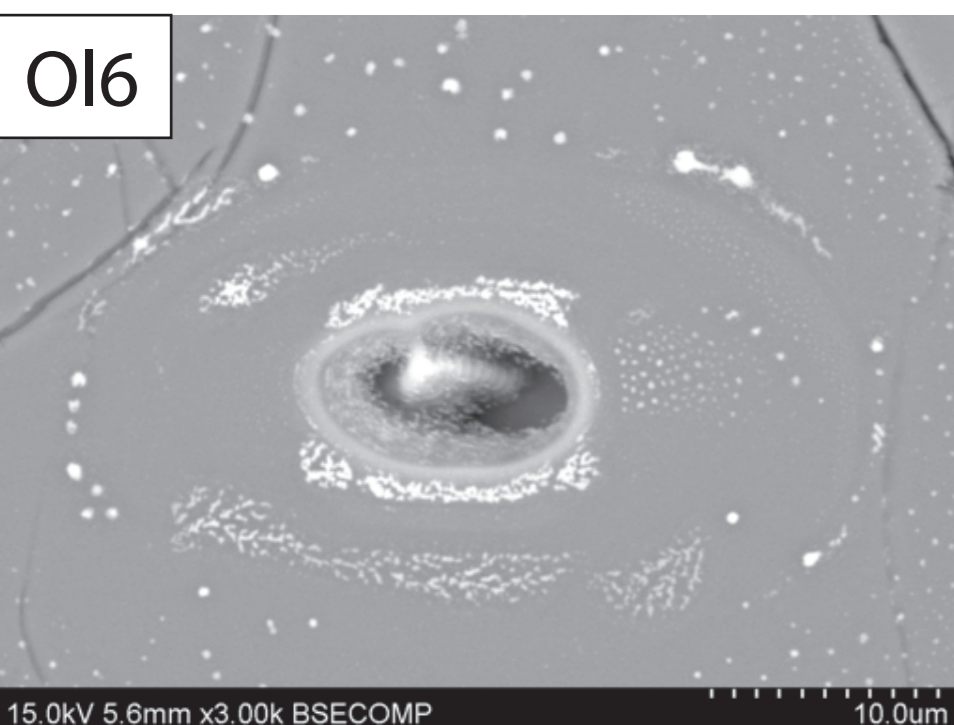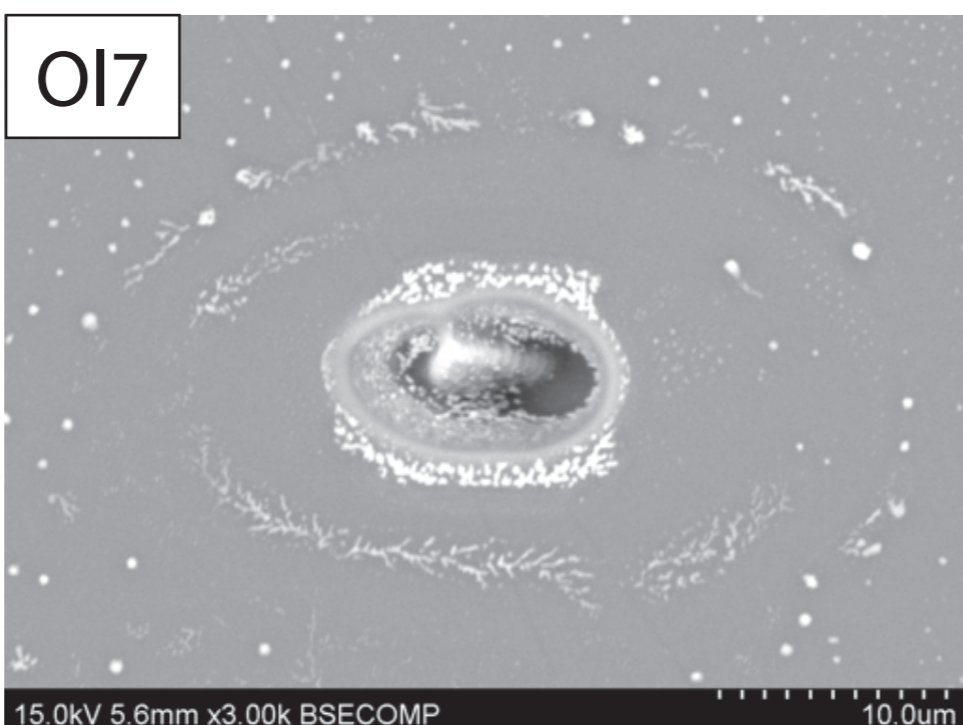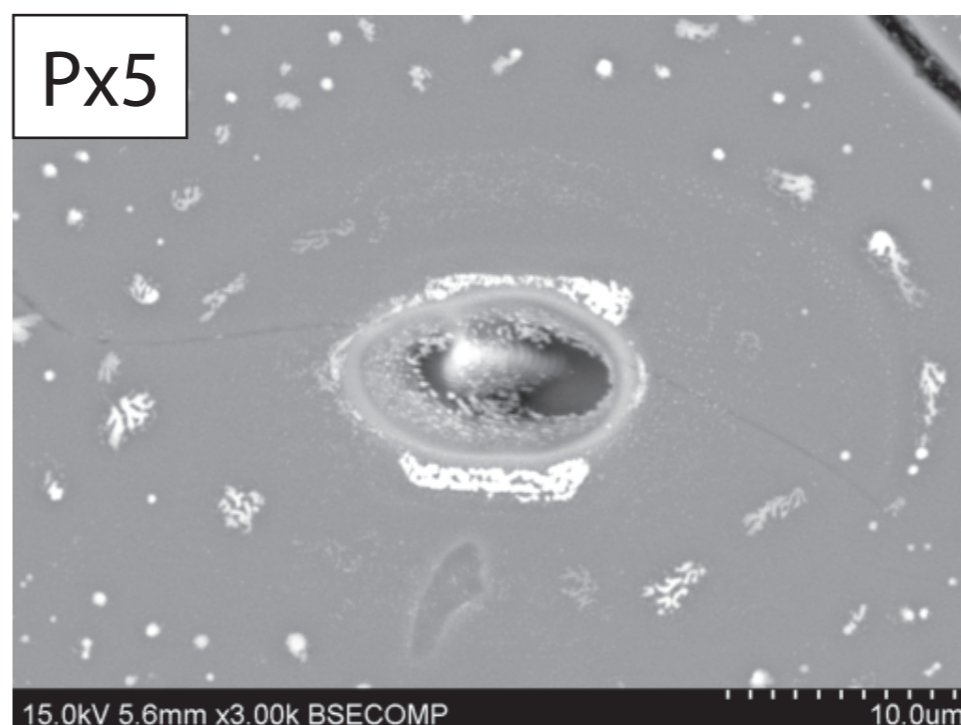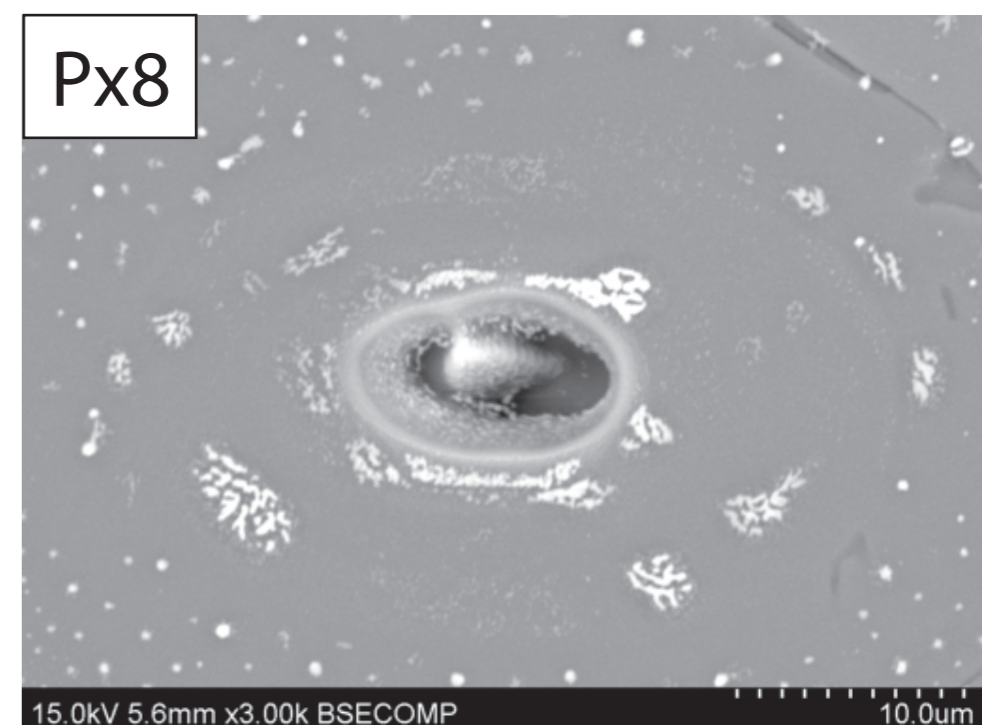

Ol-Px Al-Mg spots:

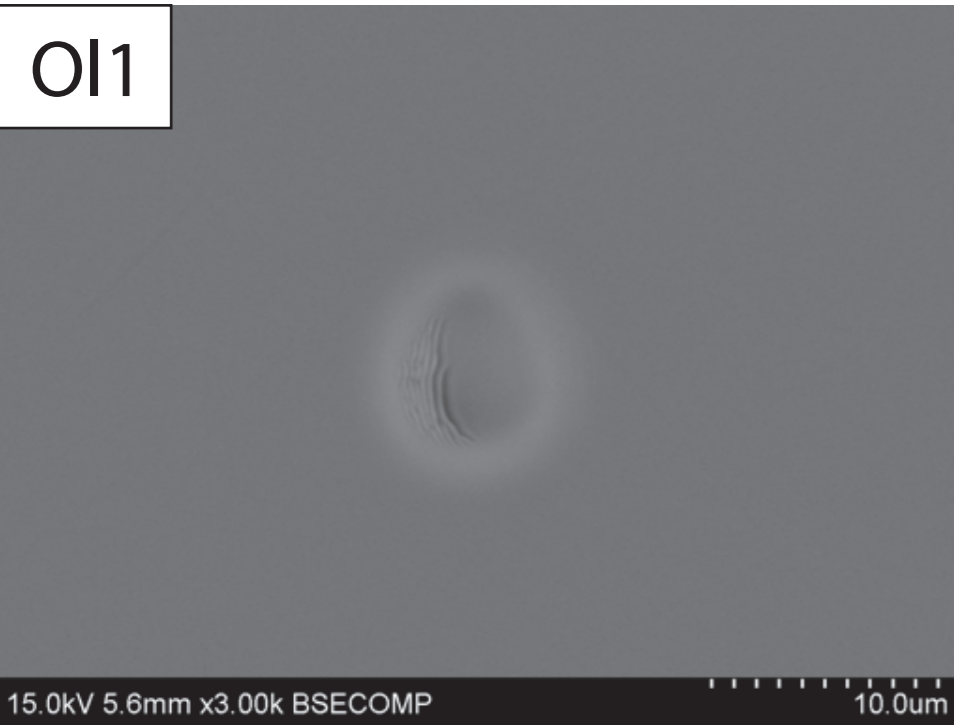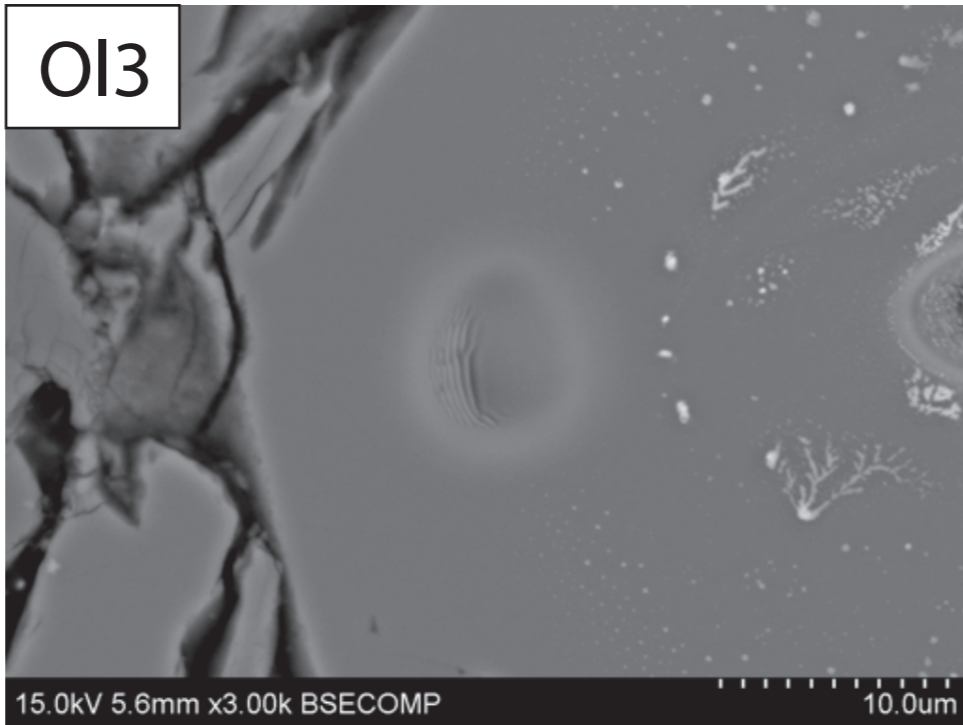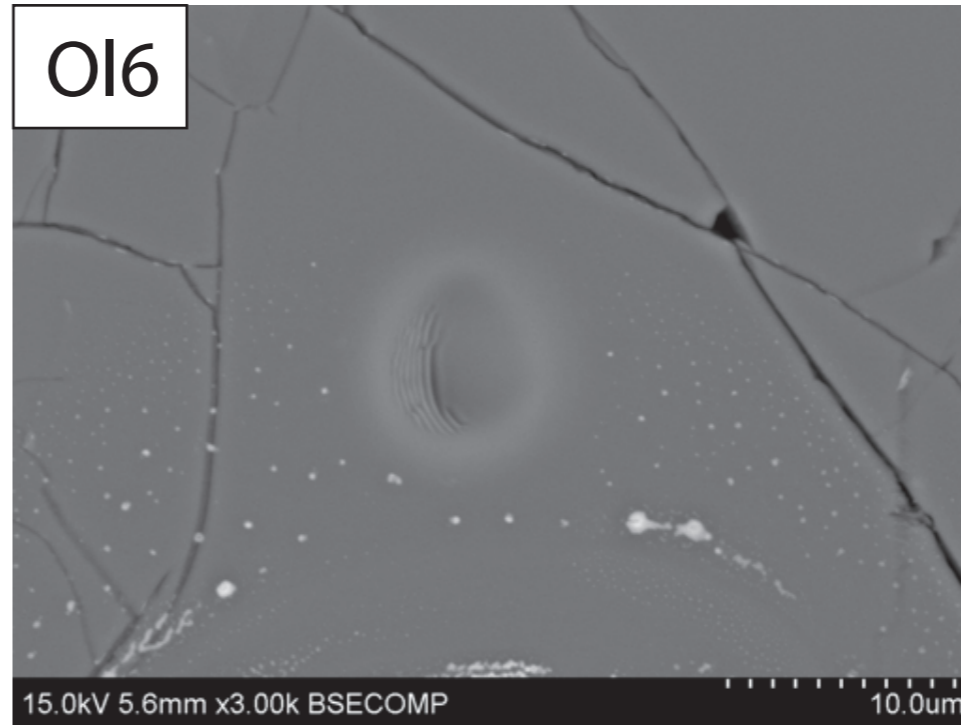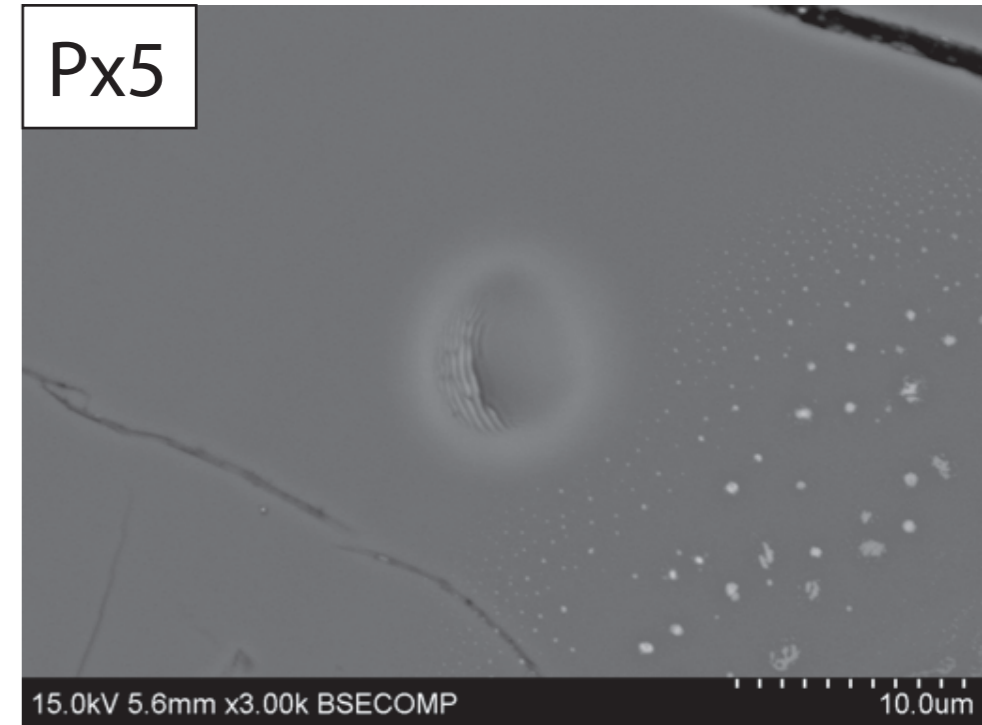

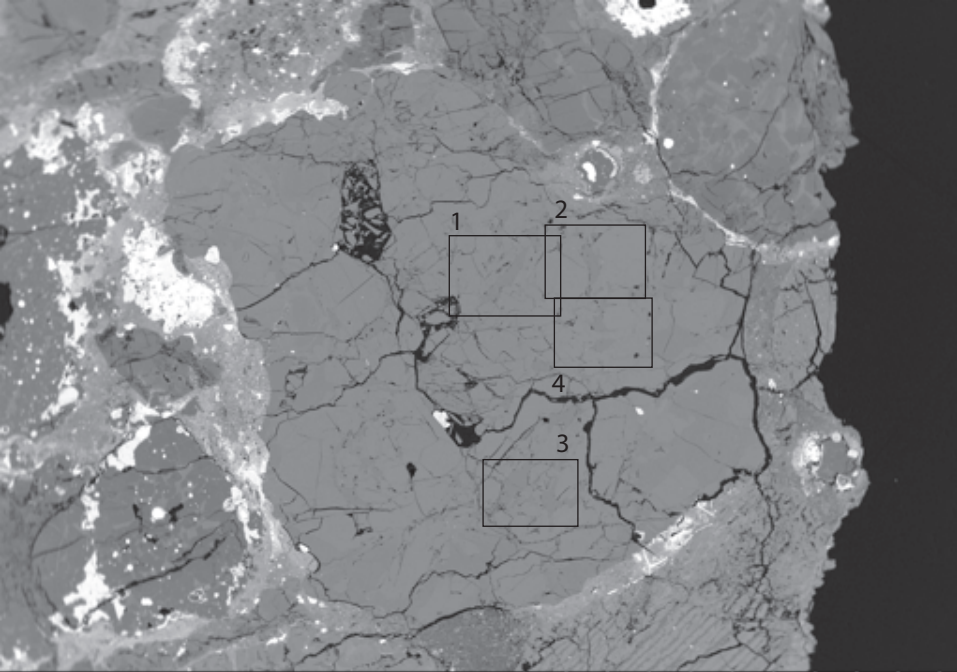



1

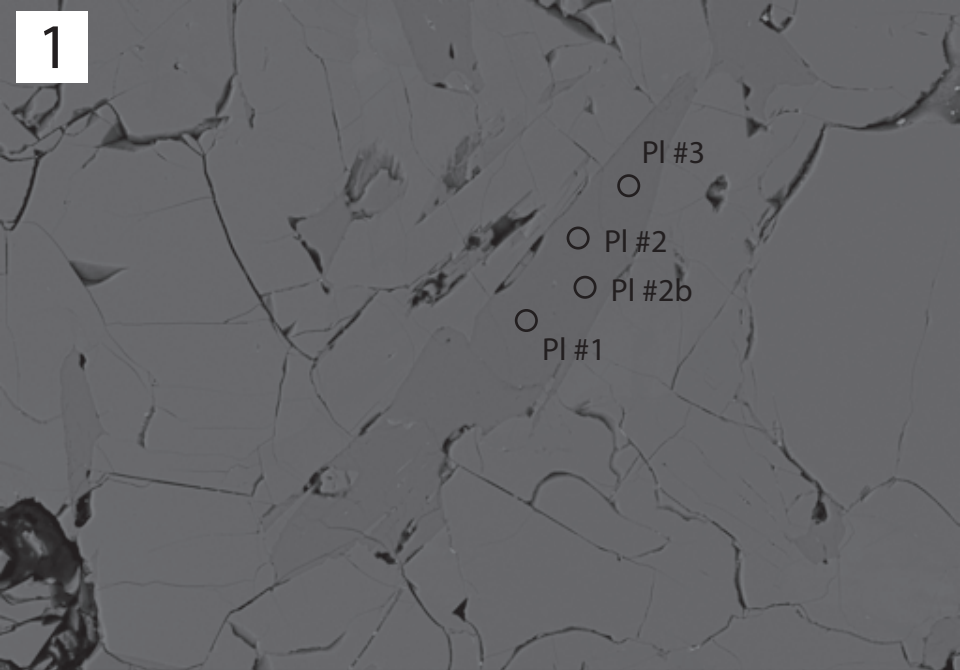

PI #3

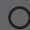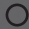

PI #2

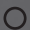

PI #2b

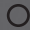

PI #1

2

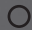

PI #4

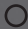

PI #5

3

PI #8

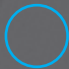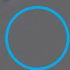

PI #8b

PI #6

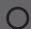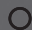

PI #7

4

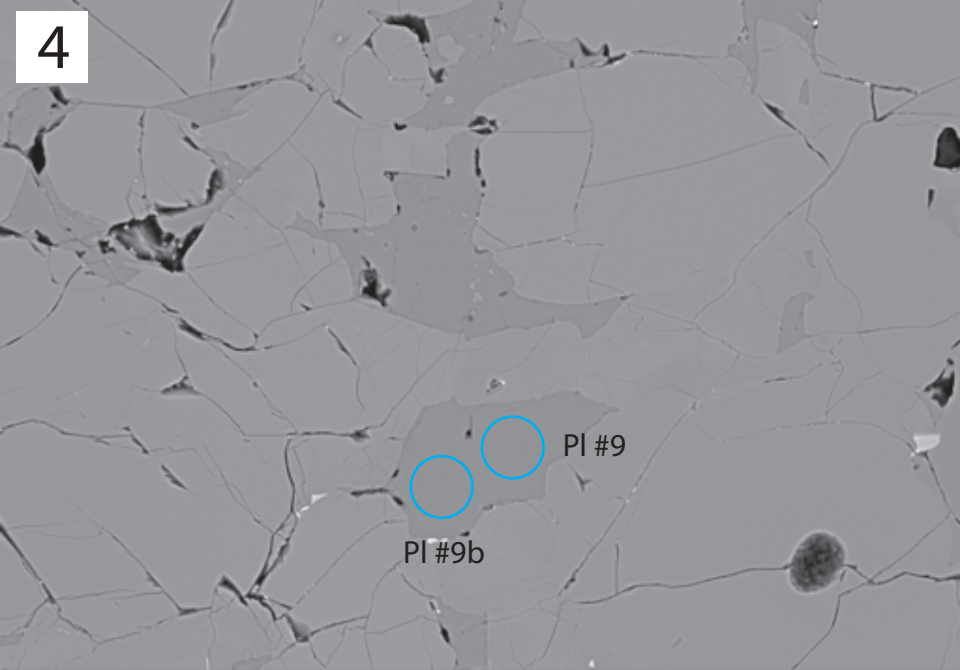

PI #9b

PI #9

An Al-Mg spots:

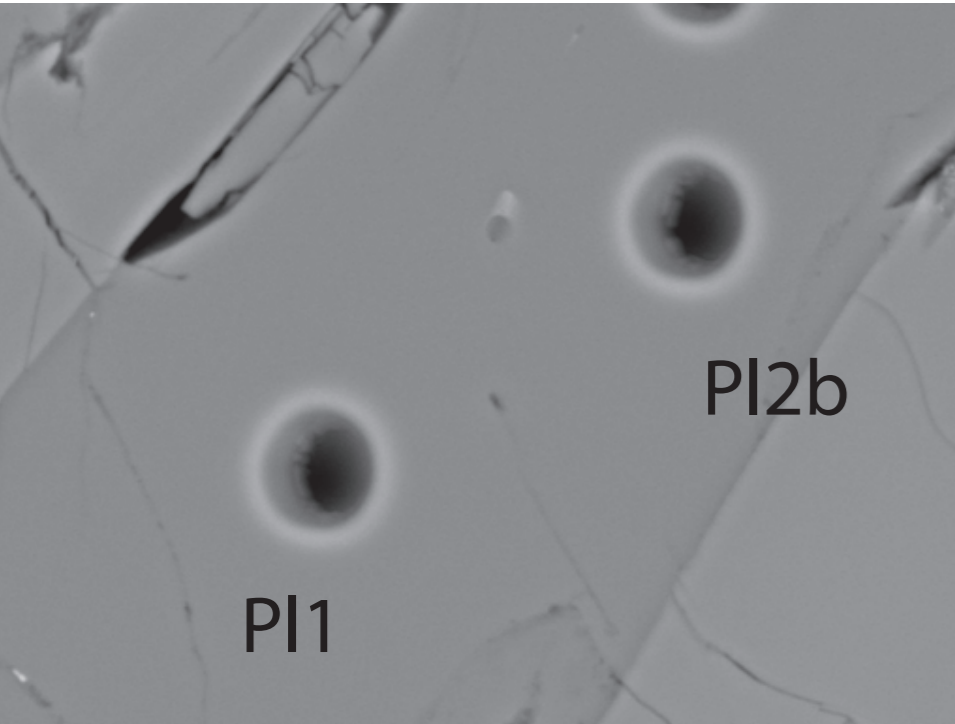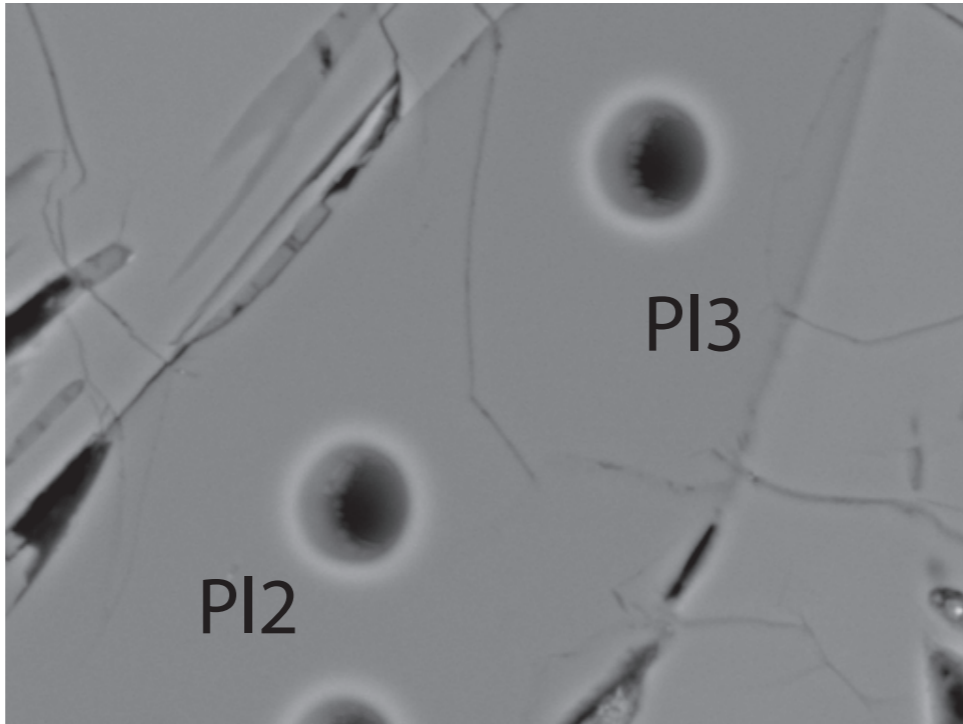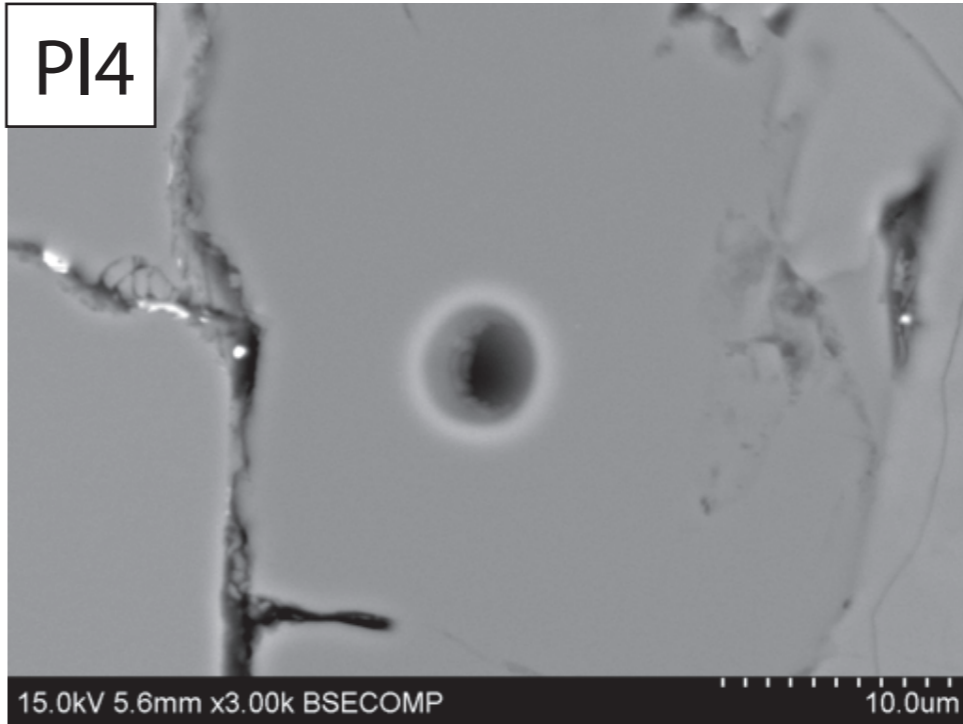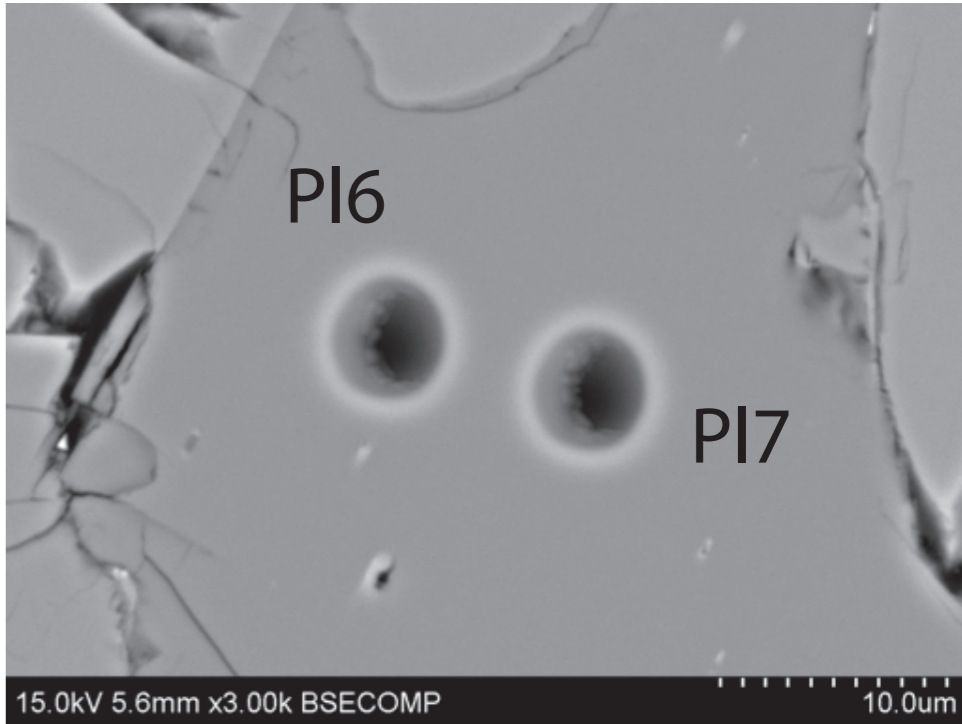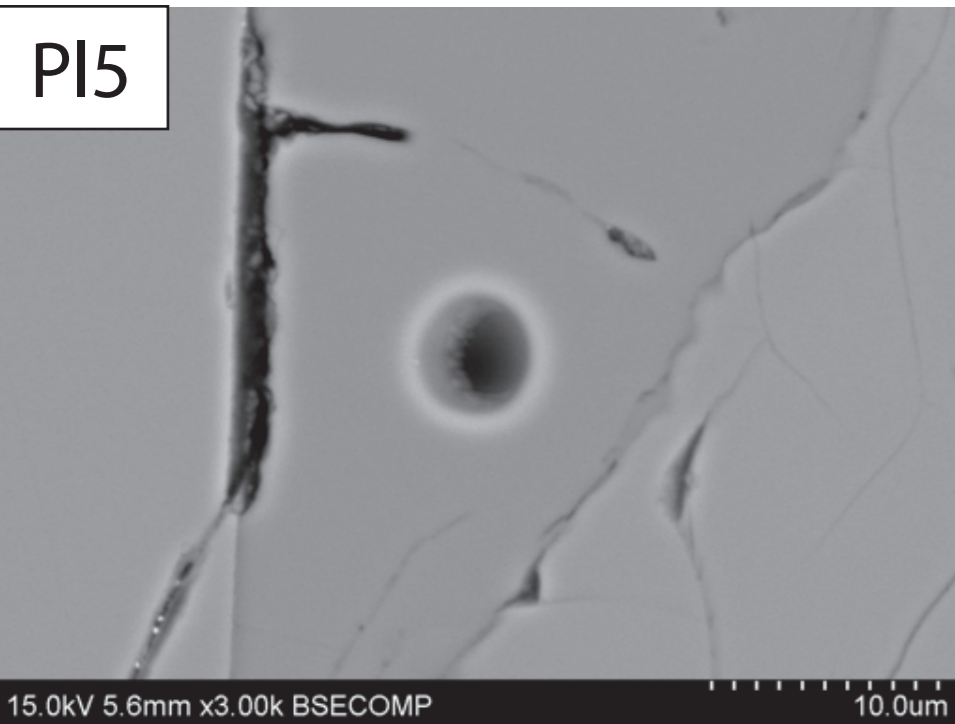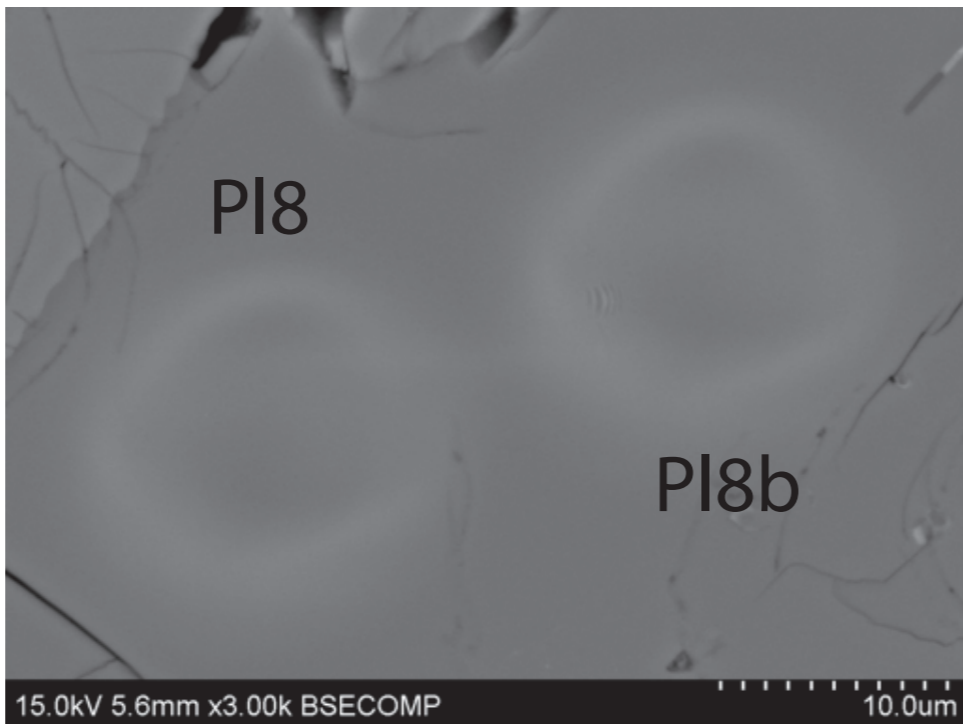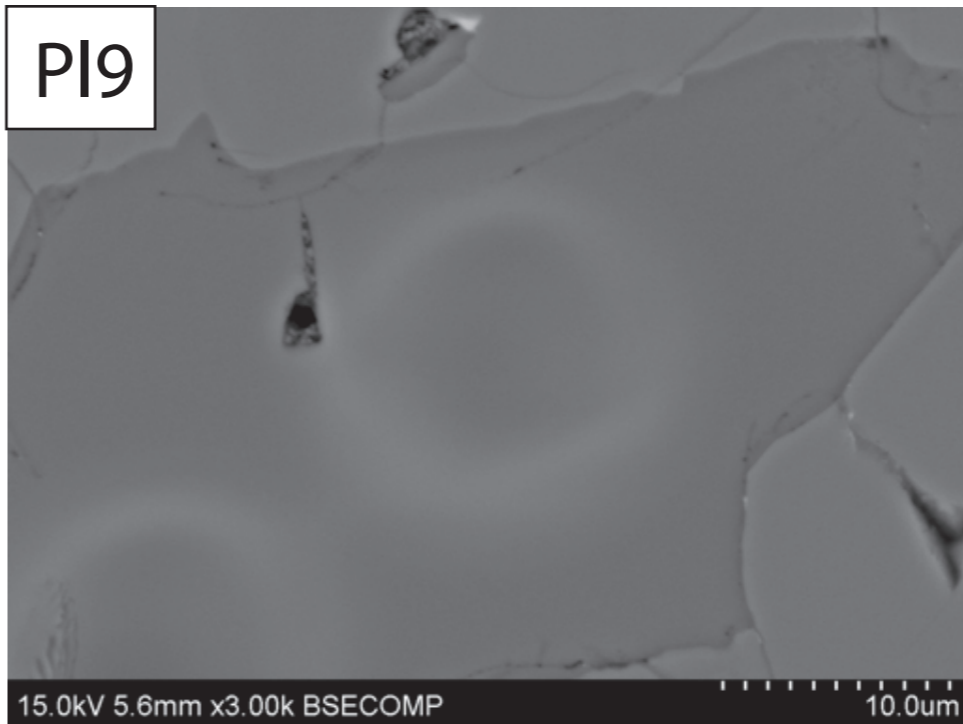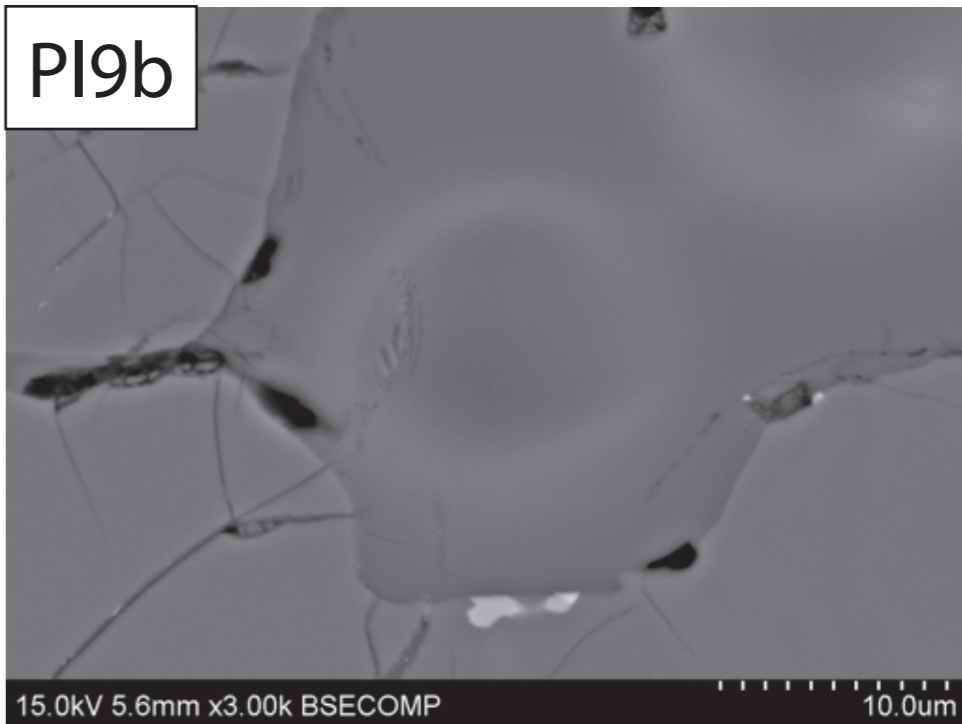

Supplement: NIHMS1757327-supplement-EA6-9.pdf [file NIHMS1757327-supplement-EA6-9.pdf]
