# Supplementary material
Source: PubMed Central journal article supplement (PMC8740609)

Electronic Annex EA 6-10: Location of SIMS analyses for Semarkona c47  
New constraints from  $^{26}\text{Al}$ - $^{26}\text{Mg}$  chronology of anorthite  
bearing chondrules in unequilibrated ordinary chondrites  
*Guillaume Siron, Kohei Fukuda, Makoto Kimura, and Noriko T. Kita*

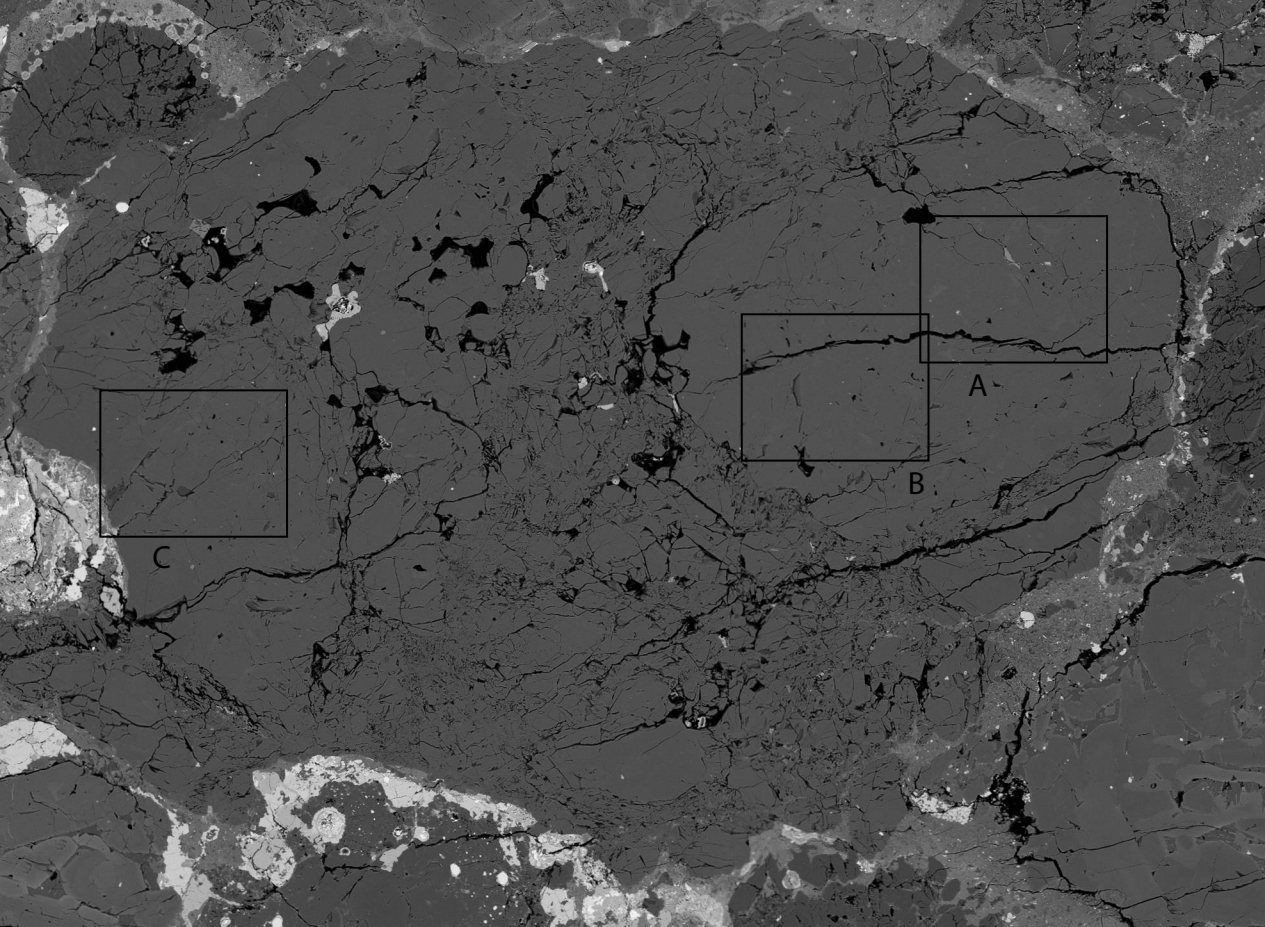

A

B

C

A

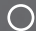

OI #3b

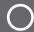

OI #2

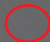

OI #3

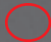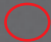

OI #1

**B**

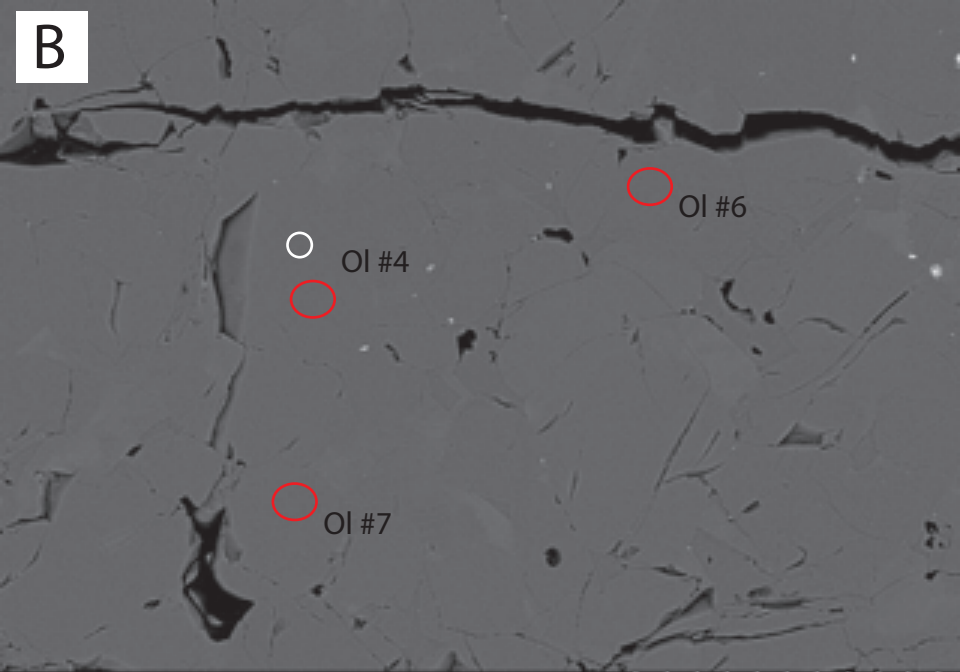

15.0kV x400 BSECOMP

100um

C

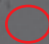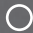

Ol #9

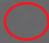

Ol #11

# Ol-Px oxygen spots:

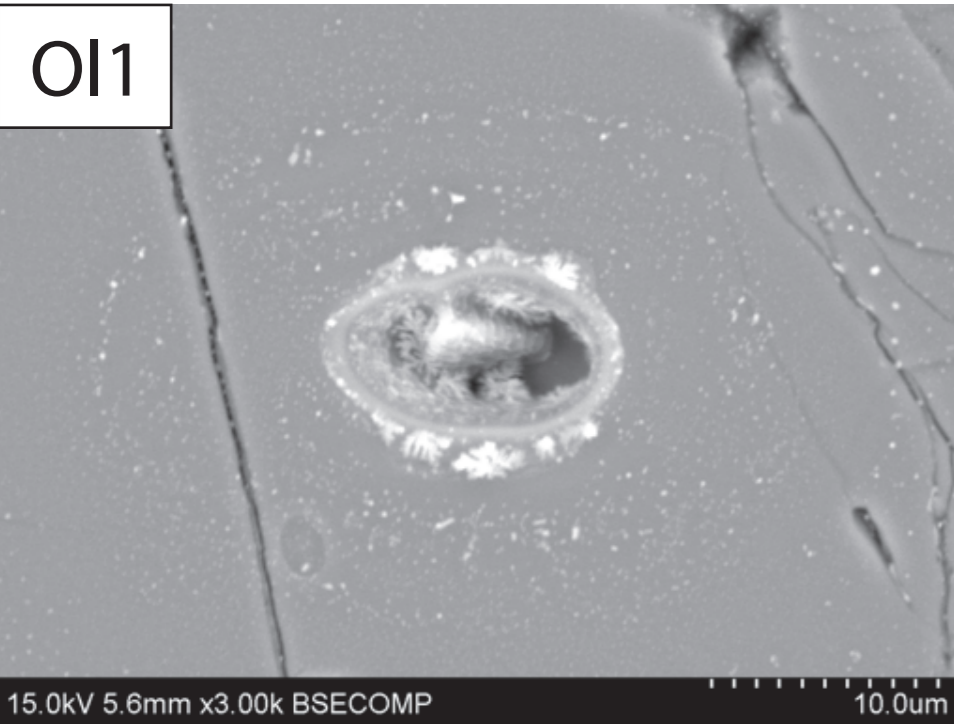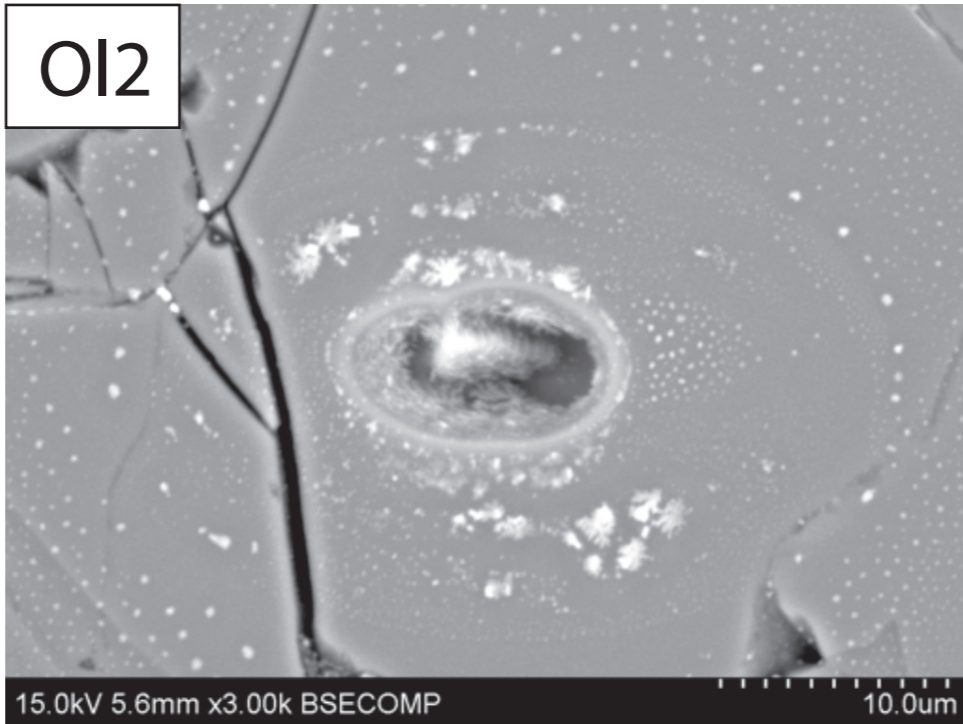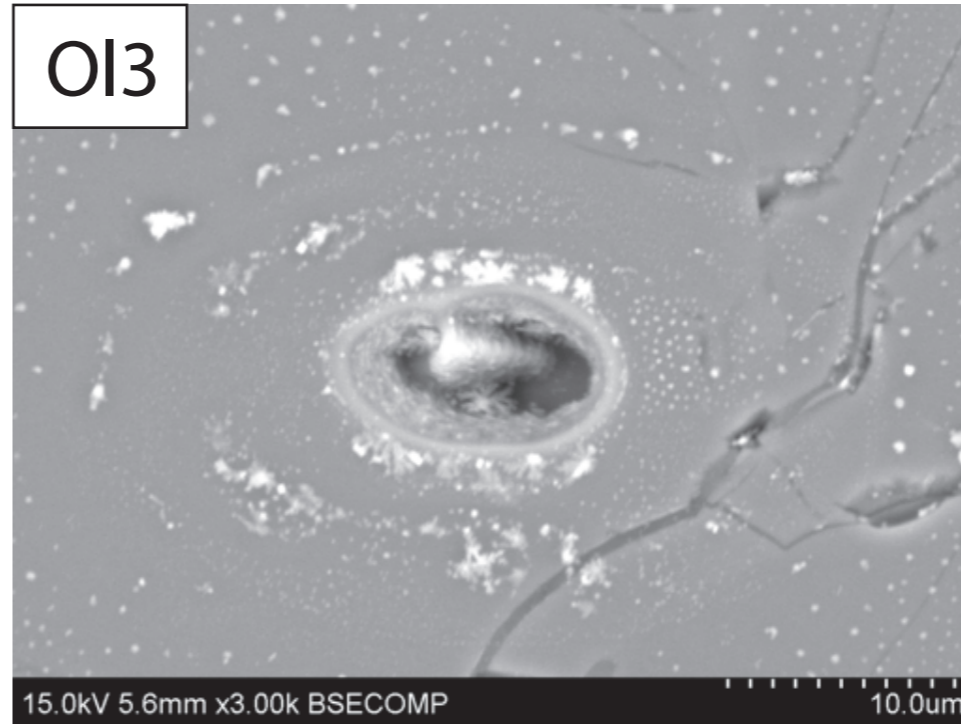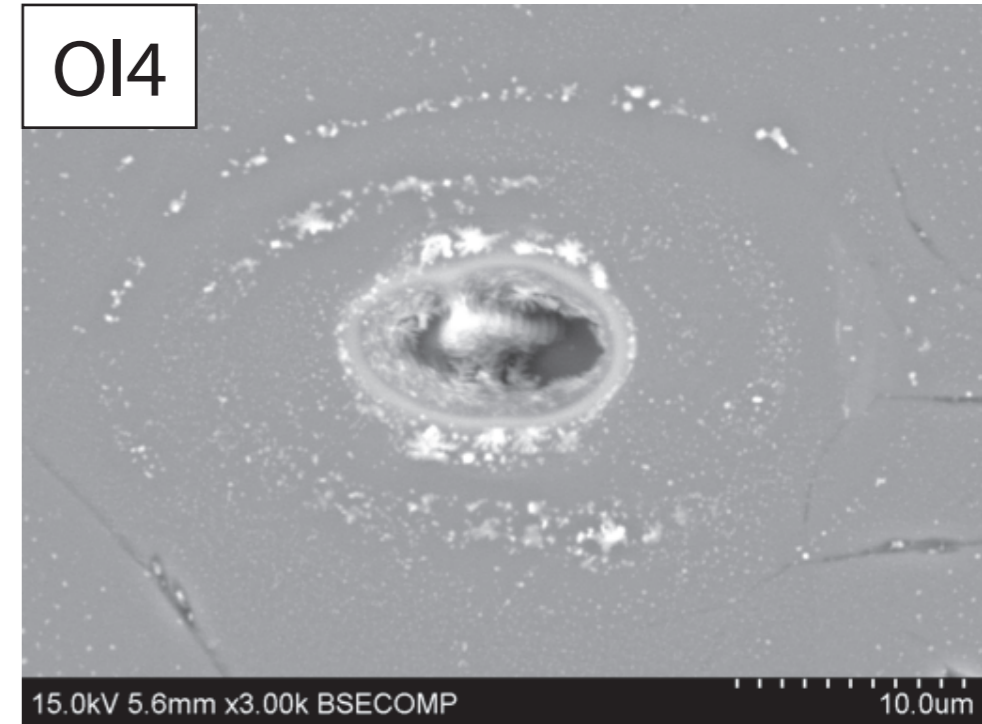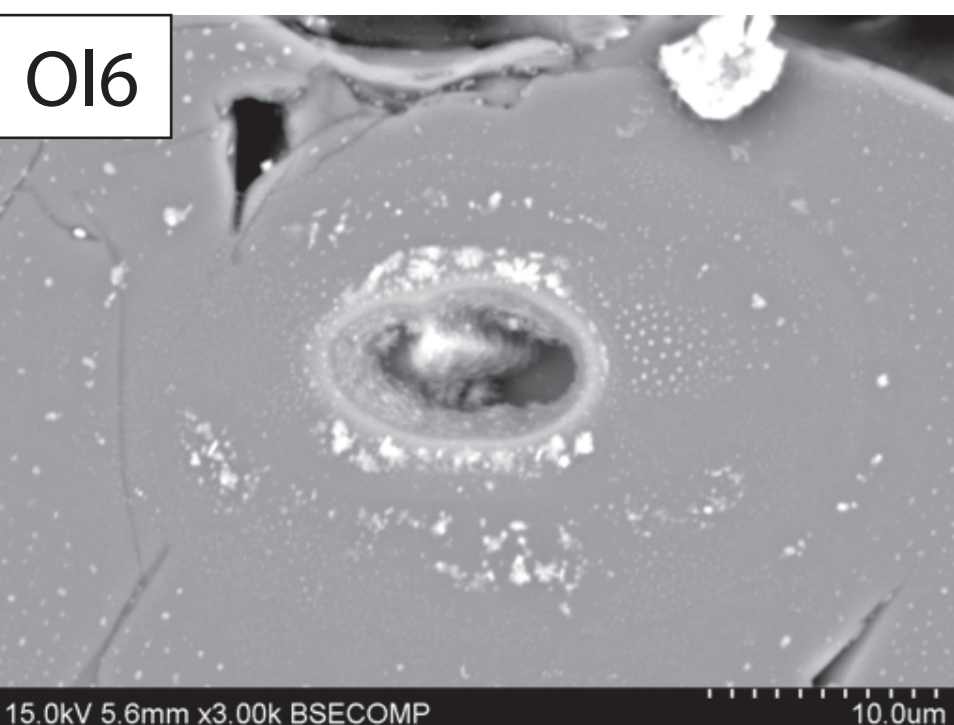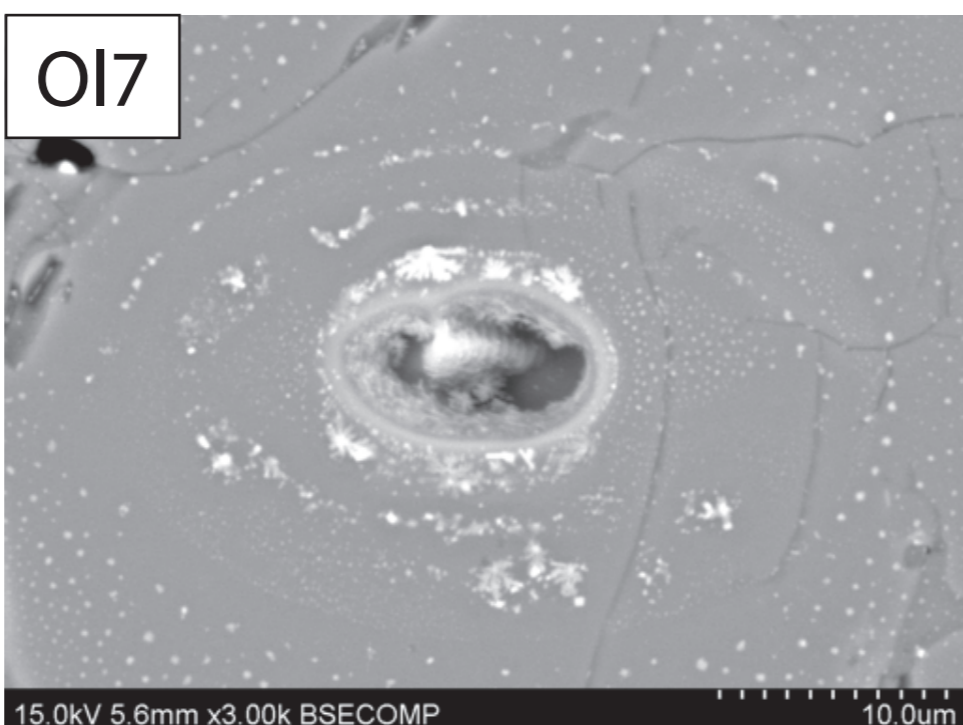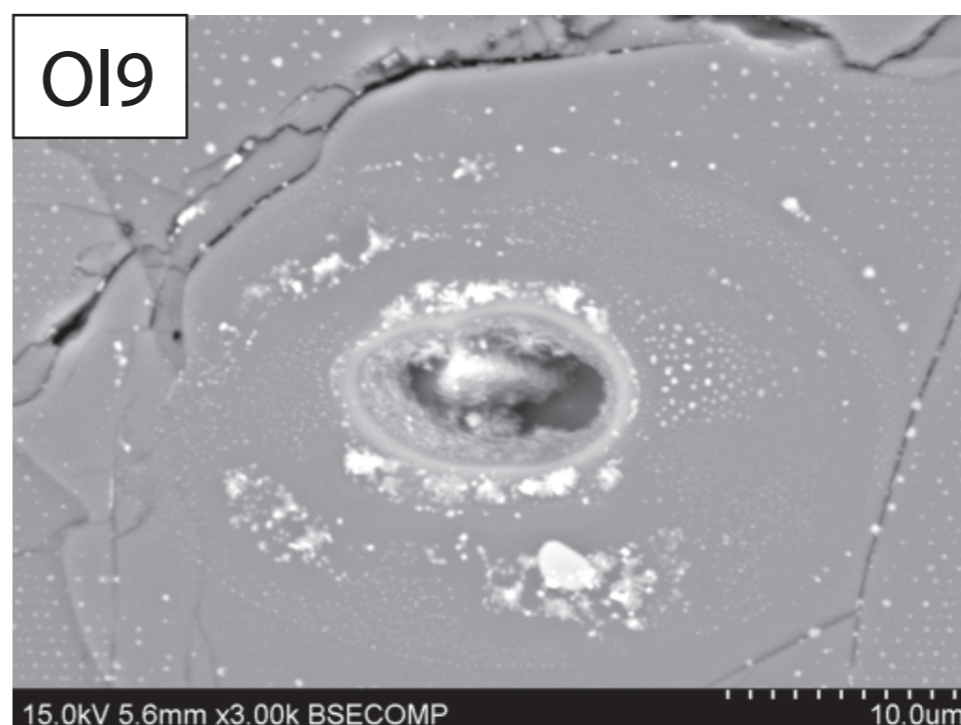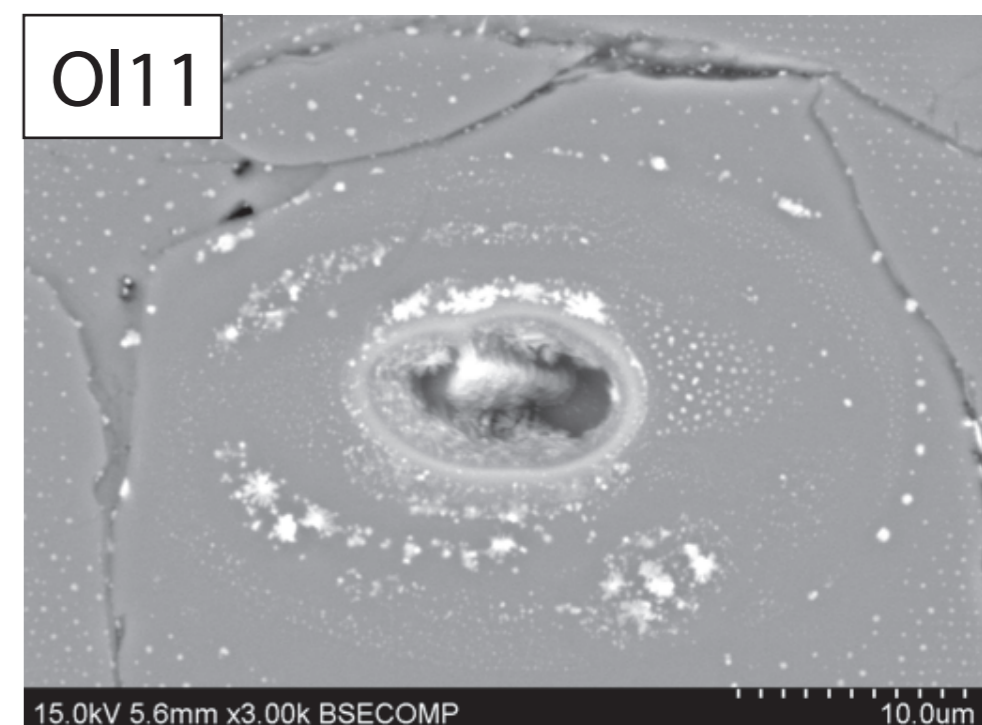

# Ol-Px Al-Mg spots:

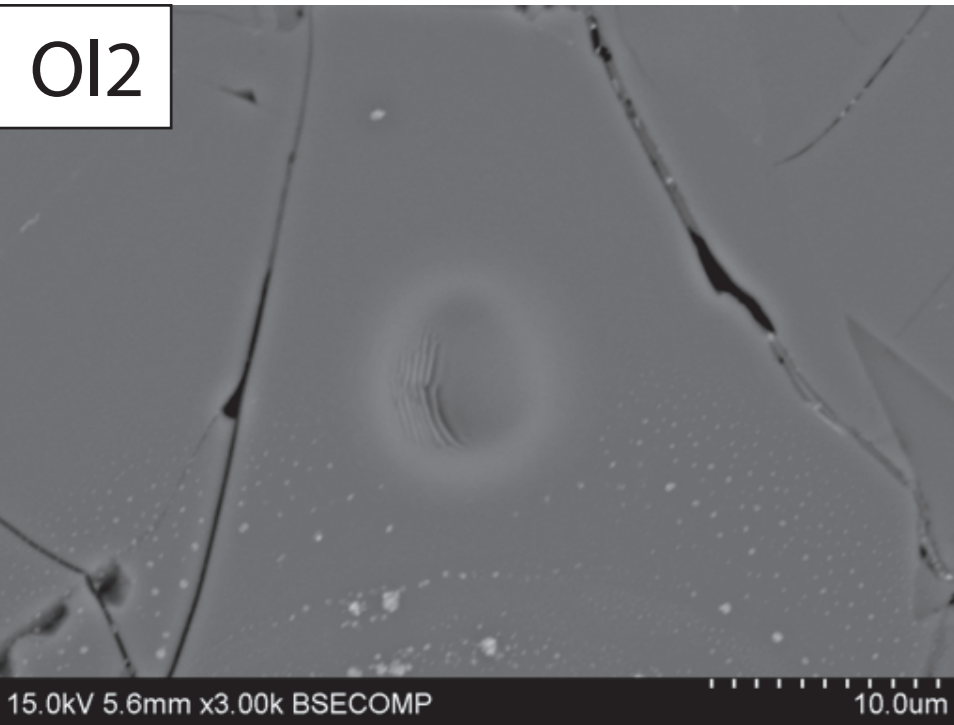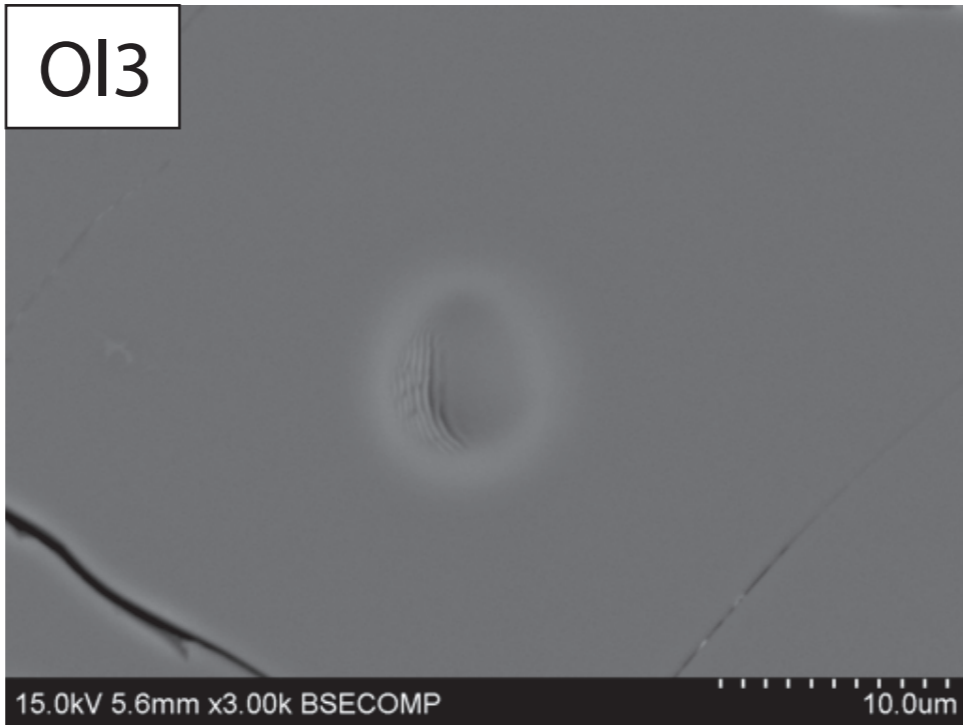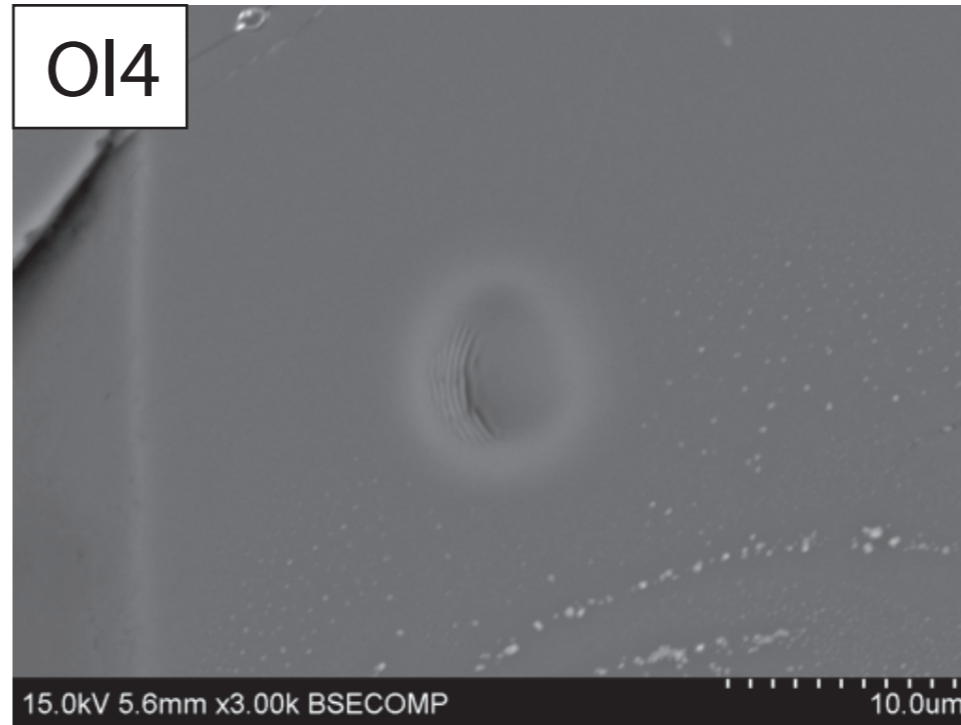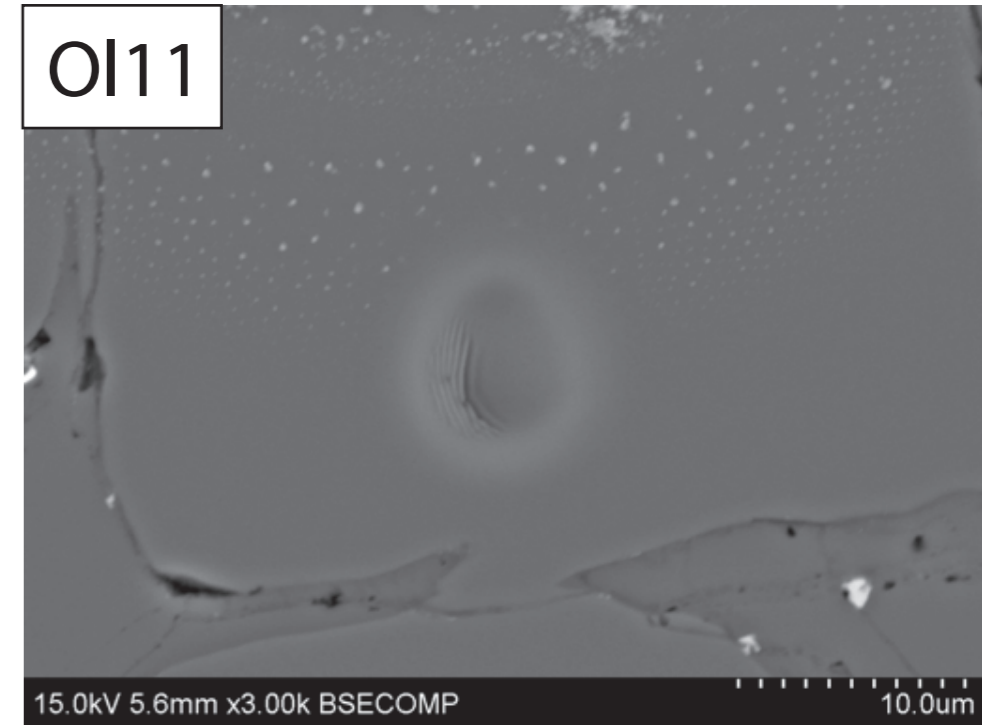

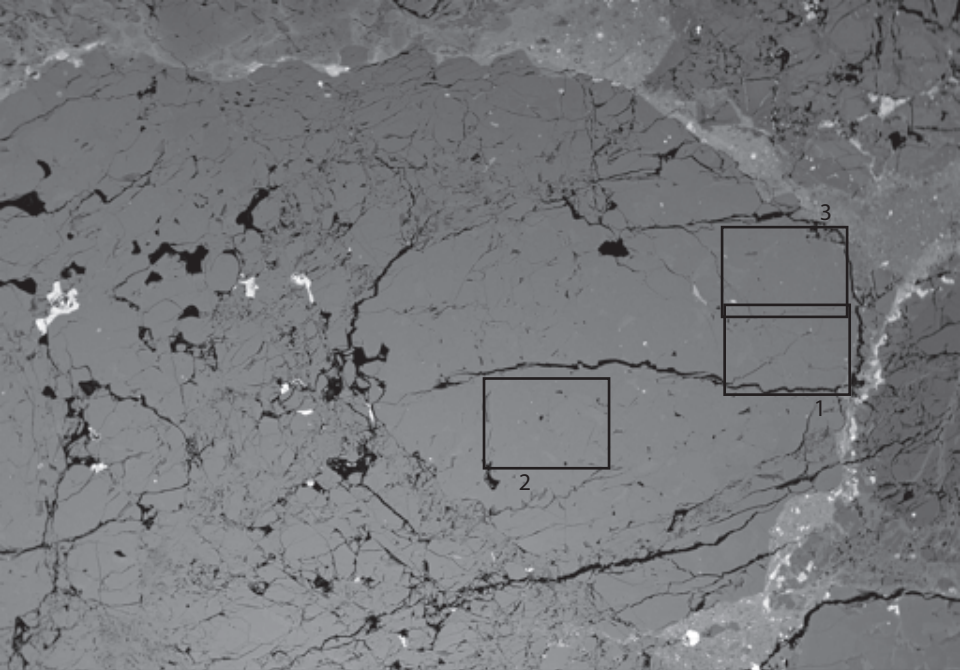

1

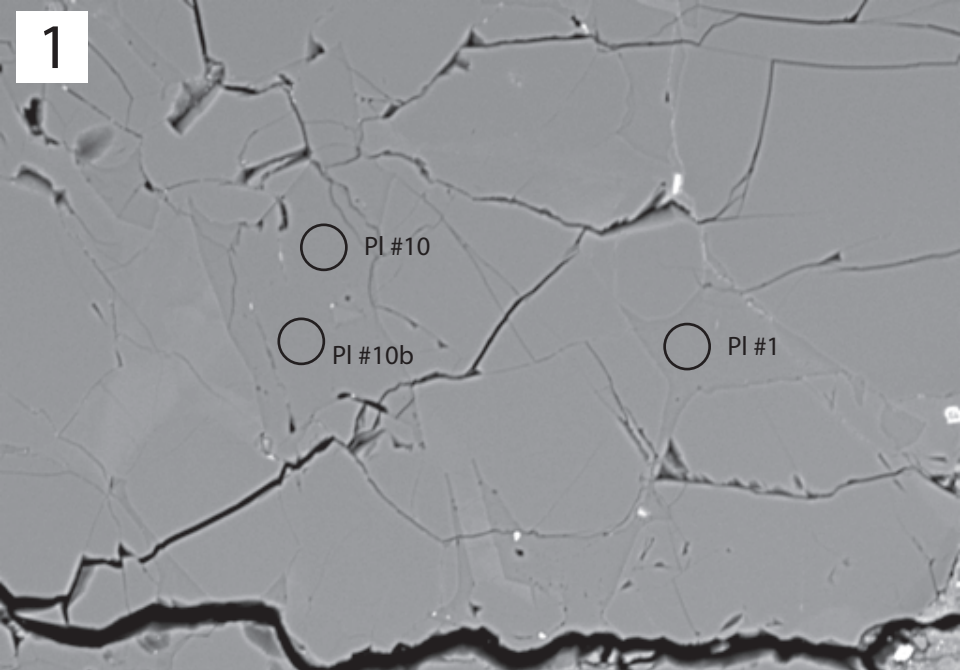



2

PI #5

3

PI #8

# An Al-Mg spots:

PI1

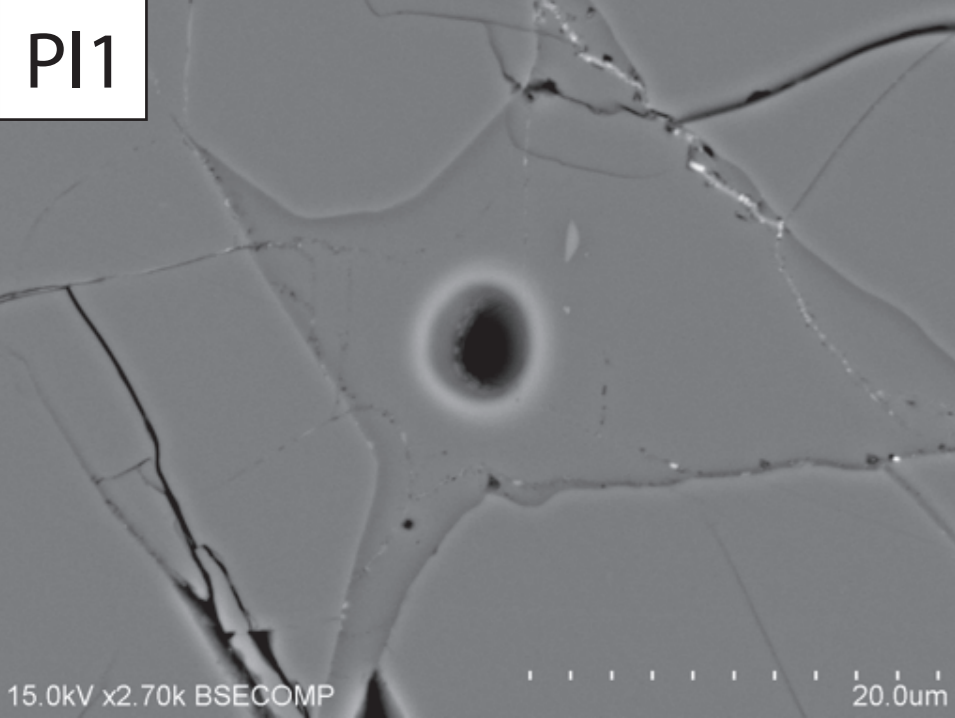

PI3

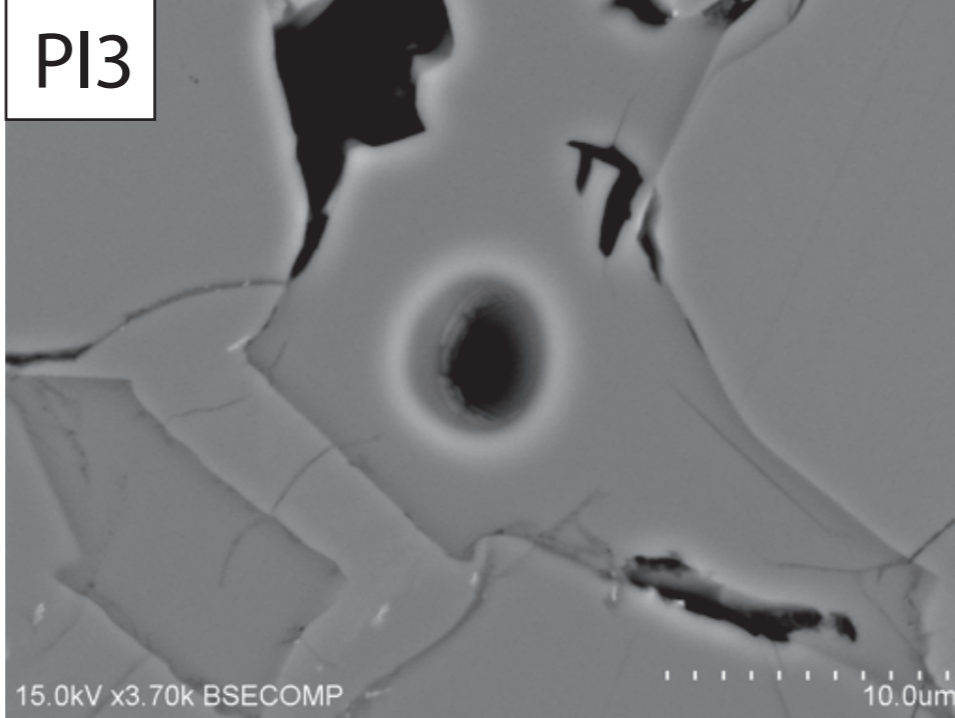

PI8

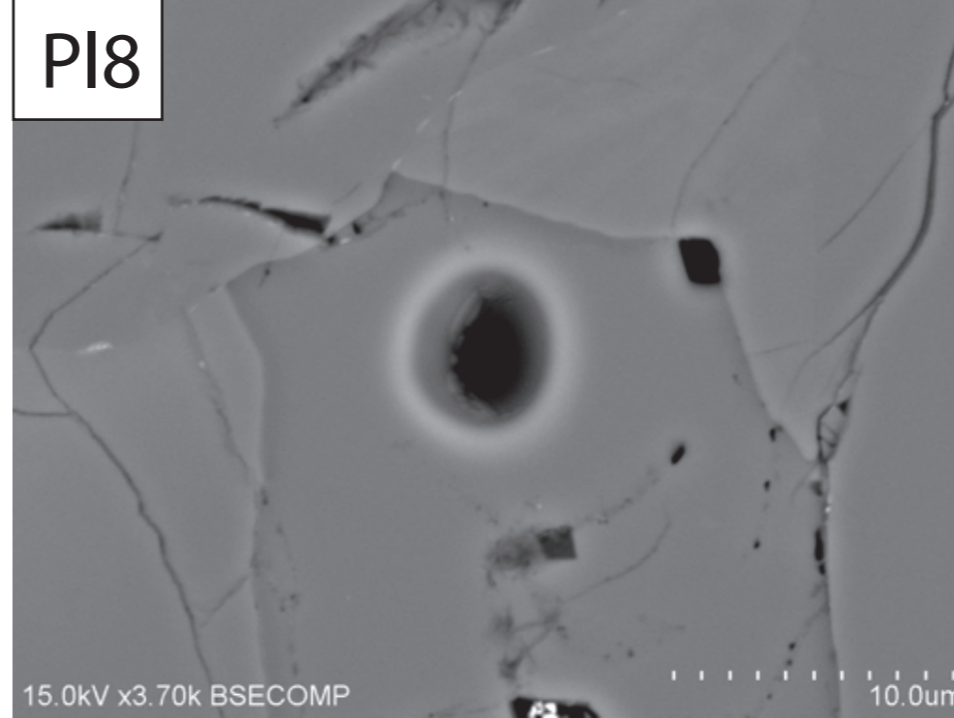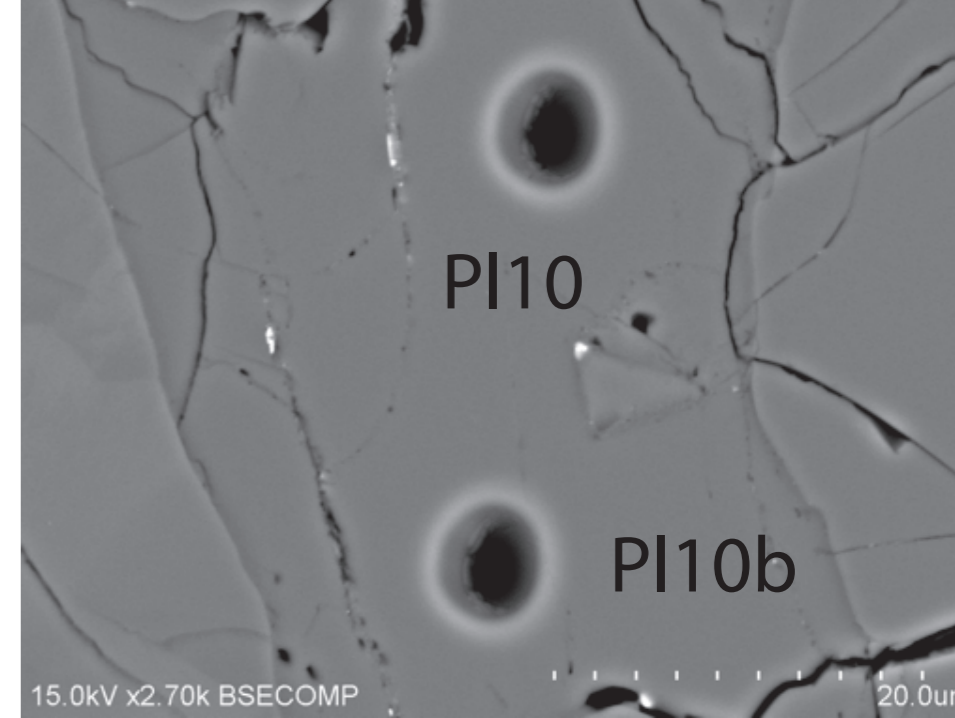

Supplement: NIHMS1757327-supplement-EA6-10.pdf [file NIHMS1757327-supplement-EA6-10.pdf]
