# Supplementary material
Source: PubMed Central journal article supplement (PMC8740609)

Electronic Annex EA 6-11: Location of SIMS analyses for NWA 8276 c7  
New constraints from  $^{26}\text{Al}$ - $^{26}\text{Mg}$  chronology of anorthite  
bearing chondrules in unequilibrated ordinary chondrites  
*Guillaume Siron, Kohei Fukuda, Makoto Kimura, and Noriko T. Kita*

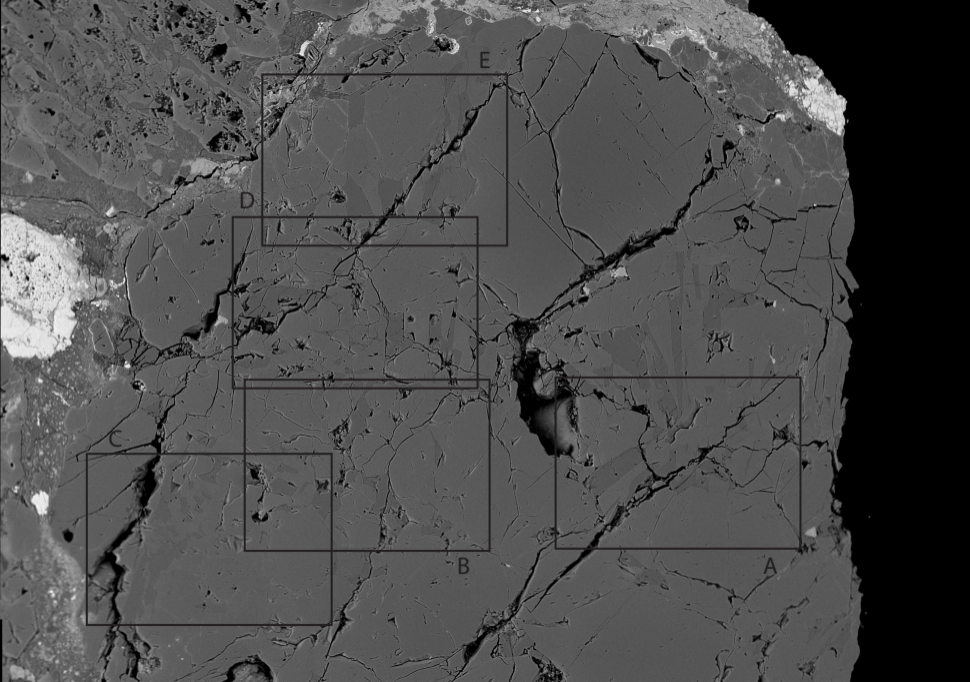

E

D

C

B

A

A

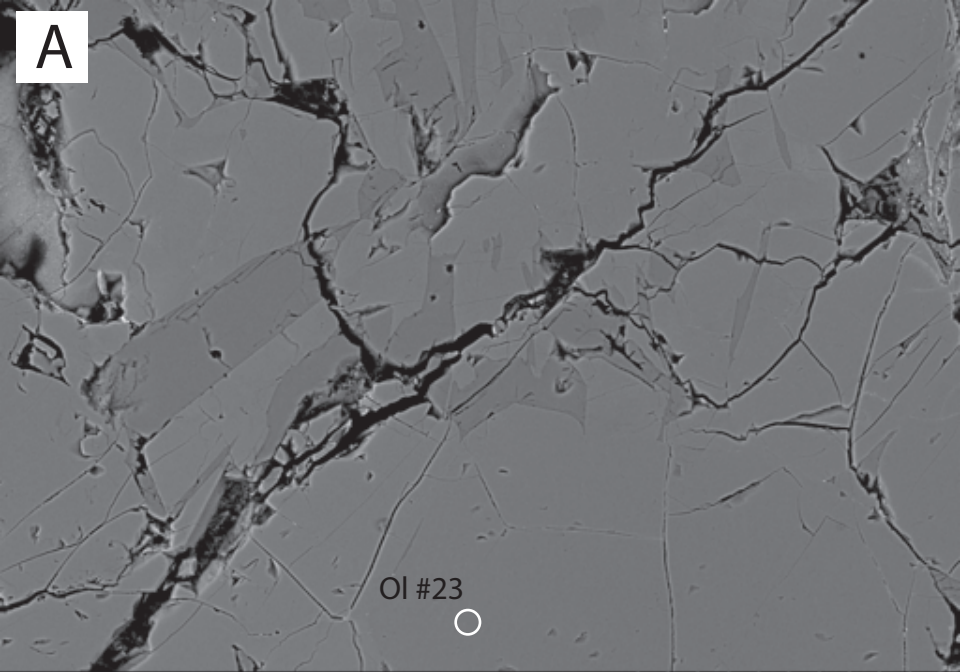

OI #23

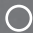

15.0kV x400 BSE3D

100um

**B**

Px #3

OI #2

15.0kV x400 BSE3D

100um

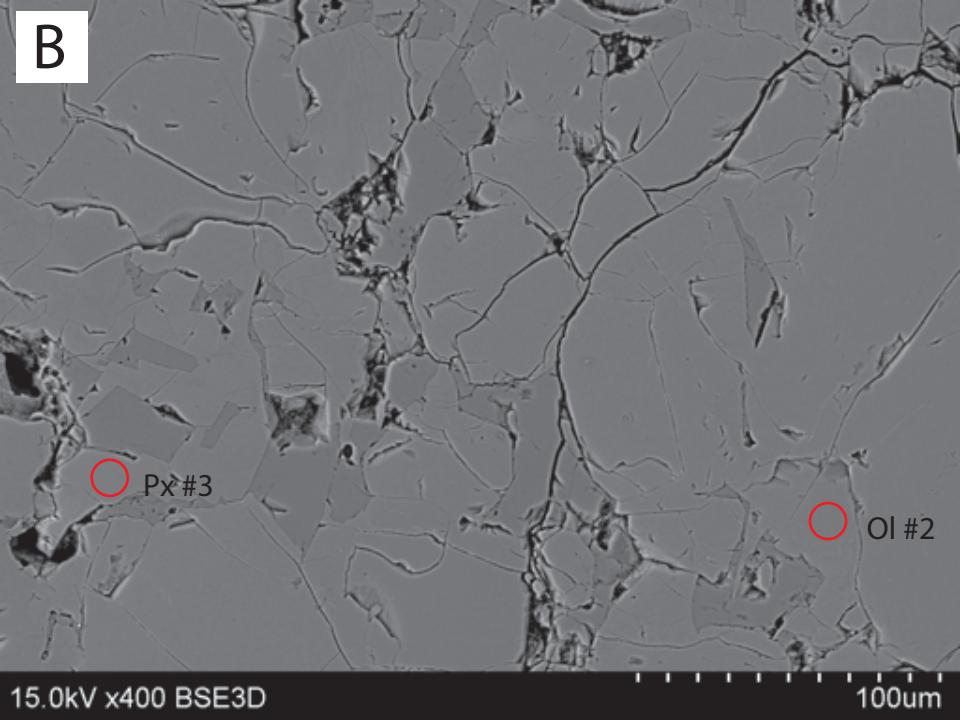

C

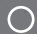

O1 #4

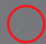

15.0kV x400 BSE3D

100um

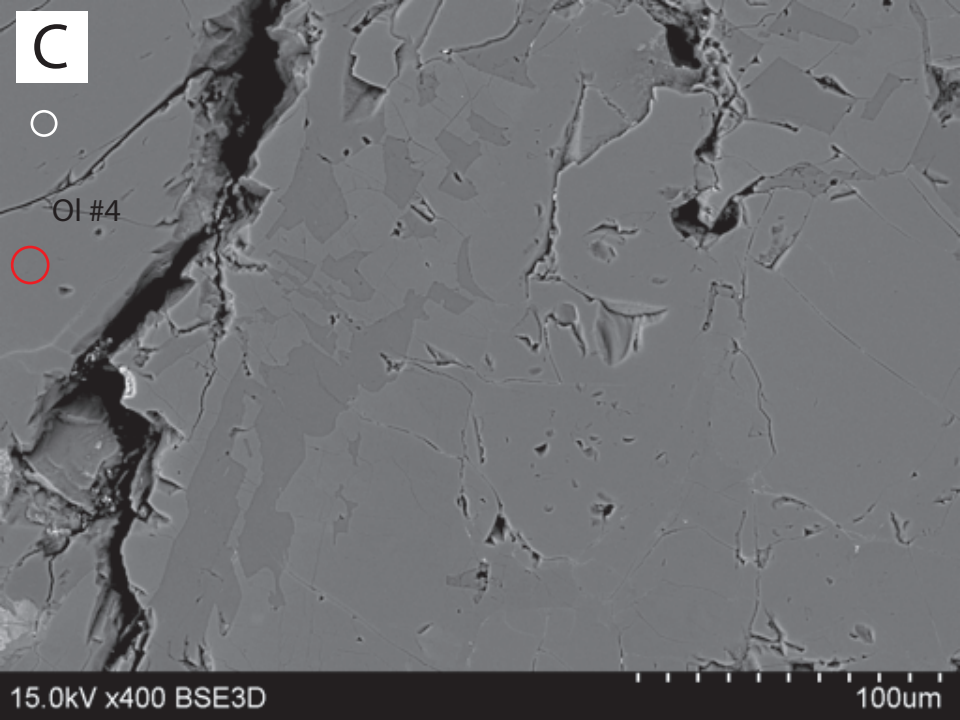

OI #5

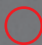

D

15.0kV x400 BSE3D

100um

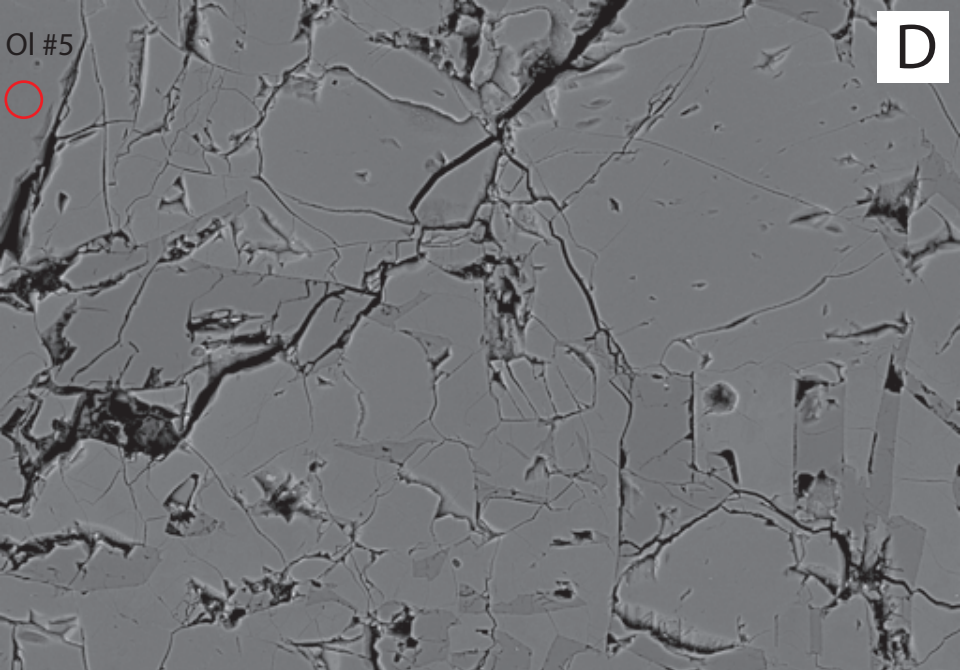

**E**

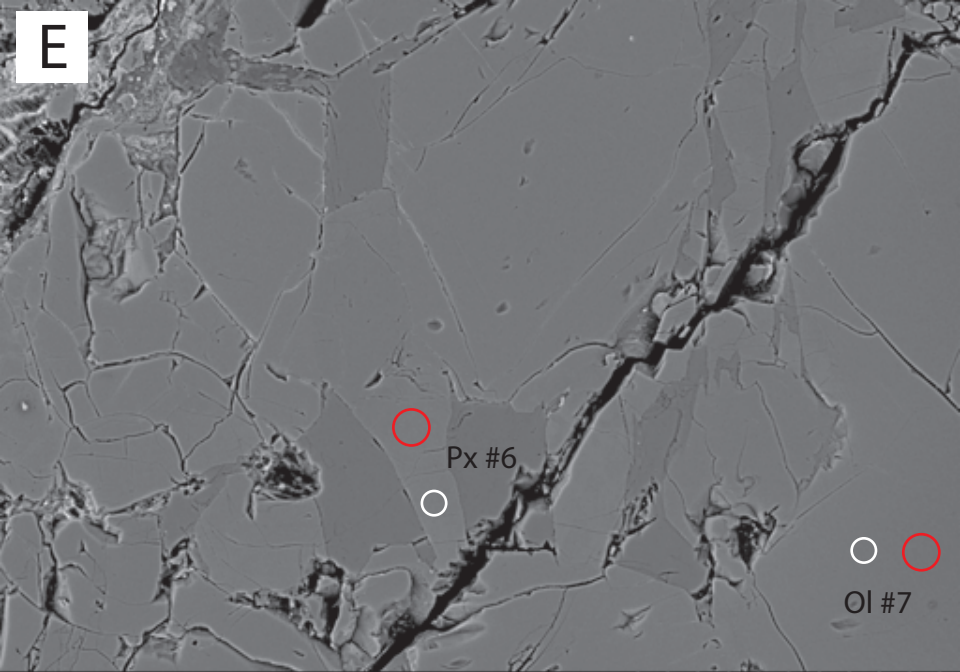

Px #6

Ol #7

15.0kV x400 BSE3D

100um

Ol-Px-An oxygen spots:

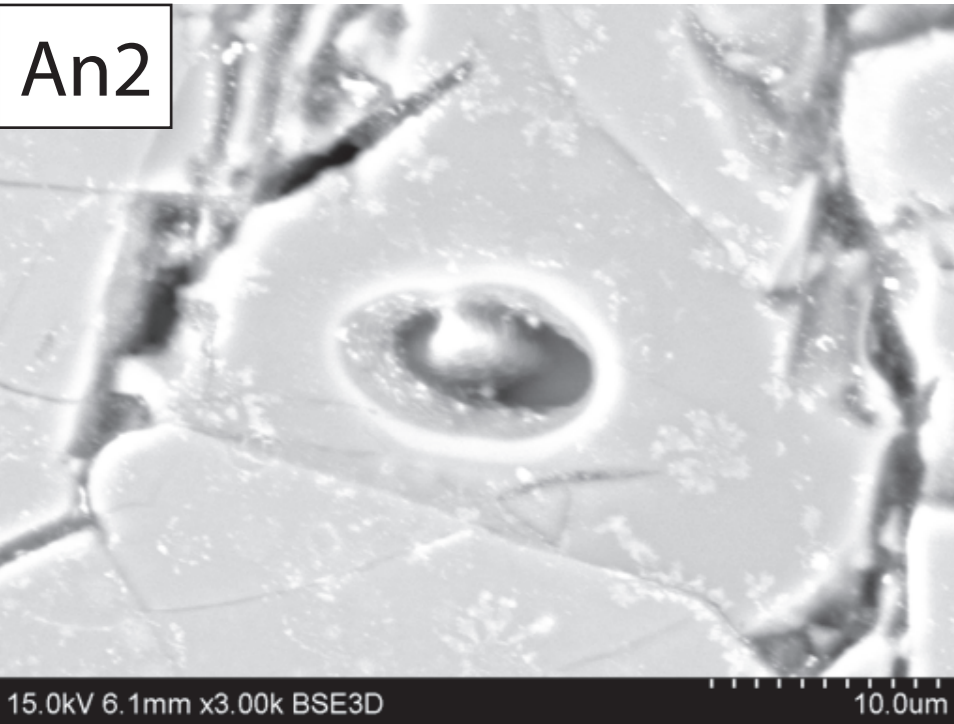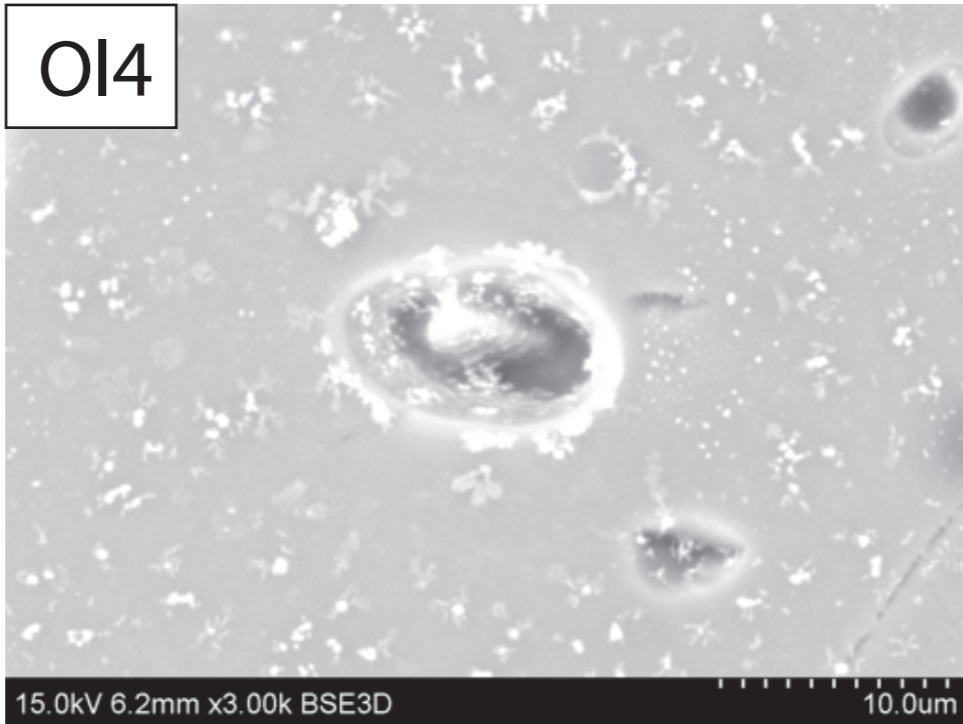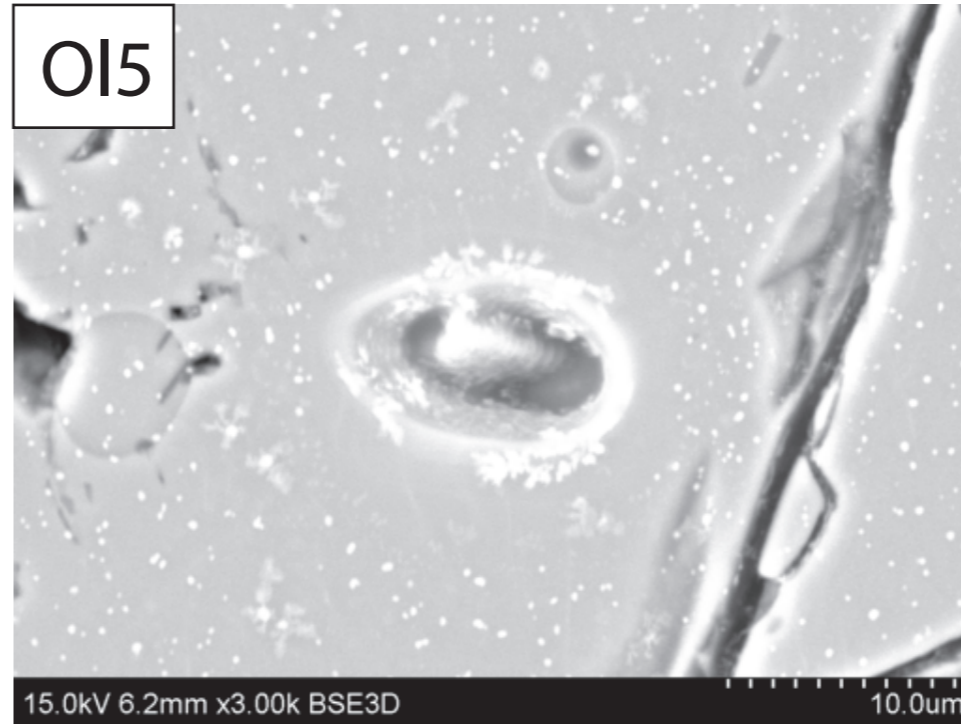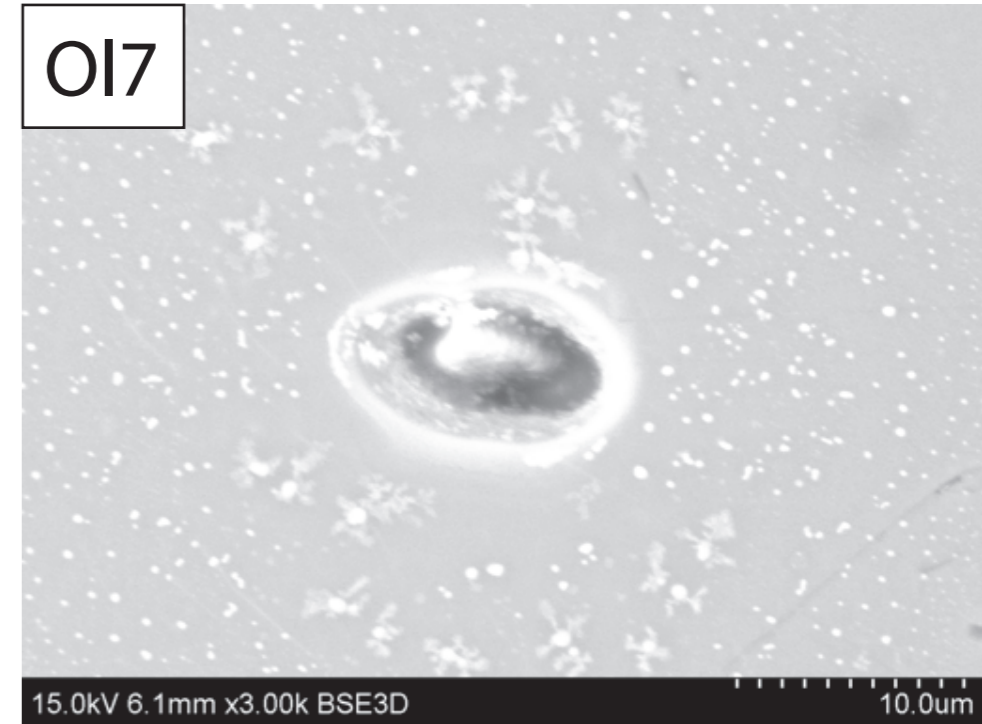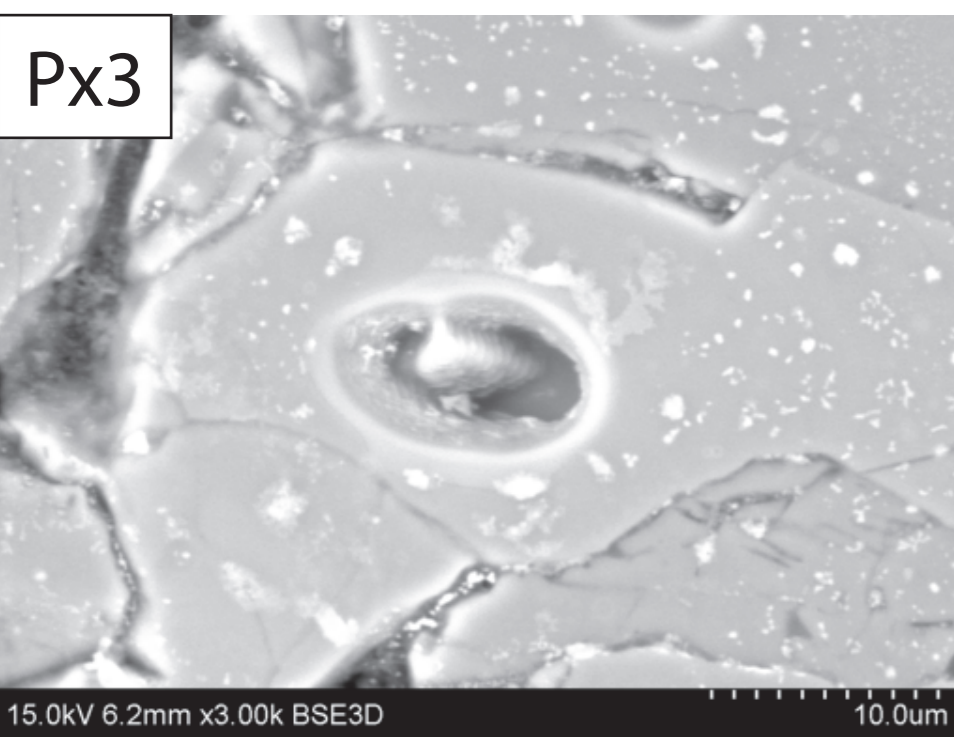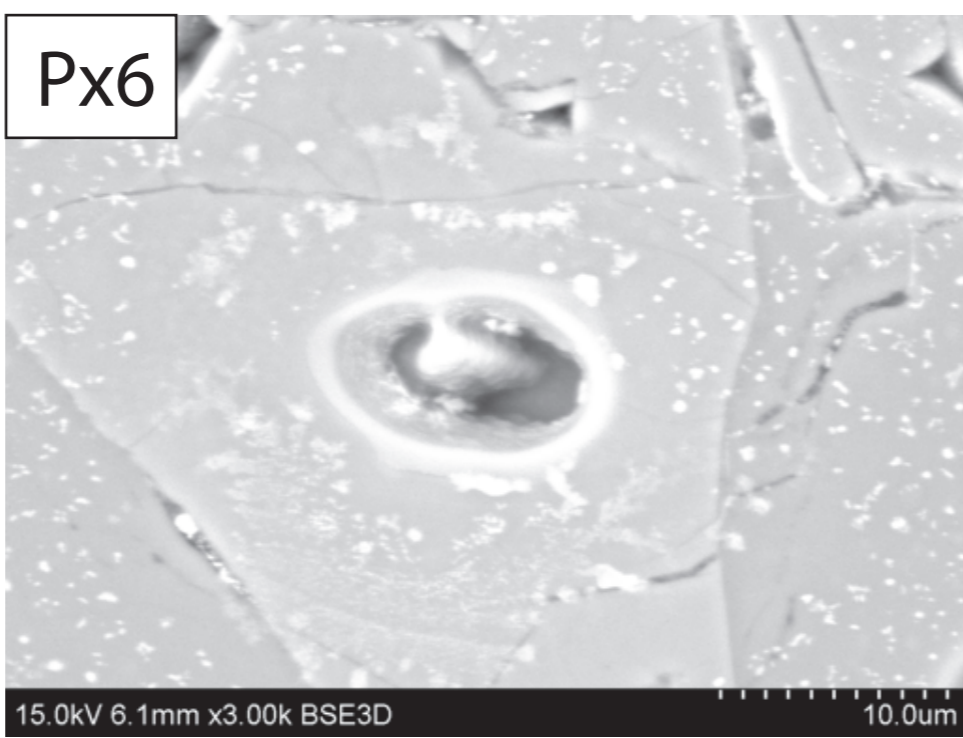

Ol-Px Al-Mg spots:

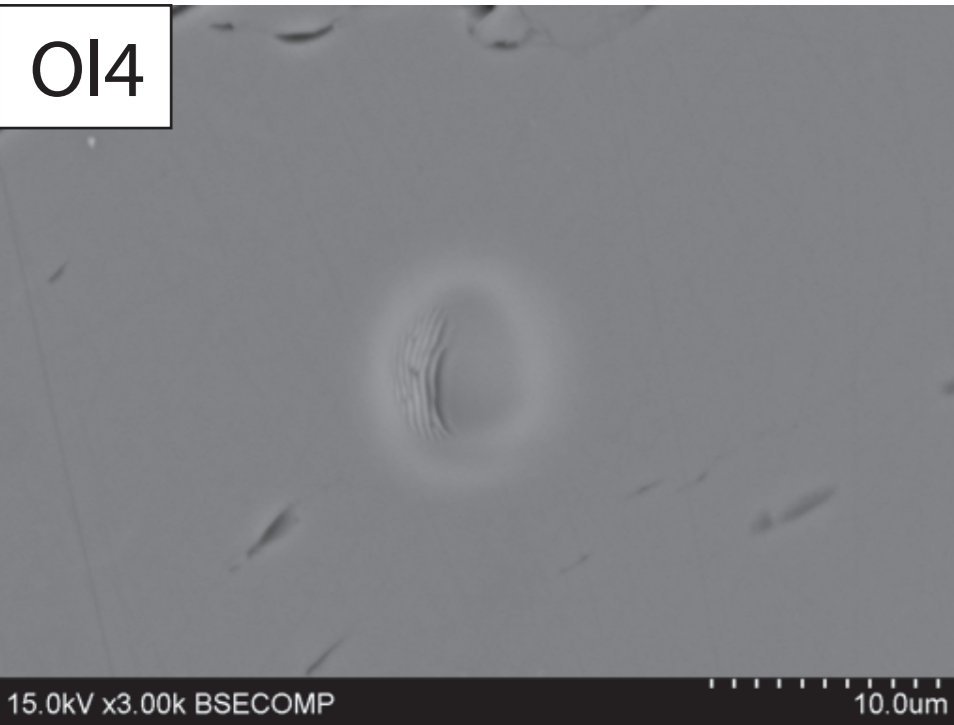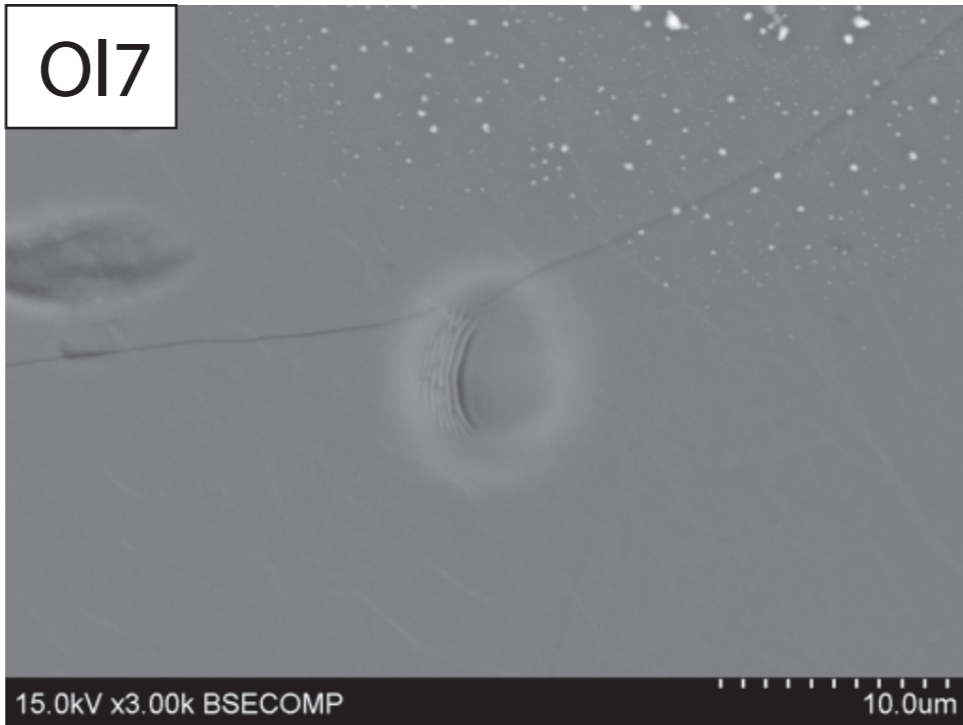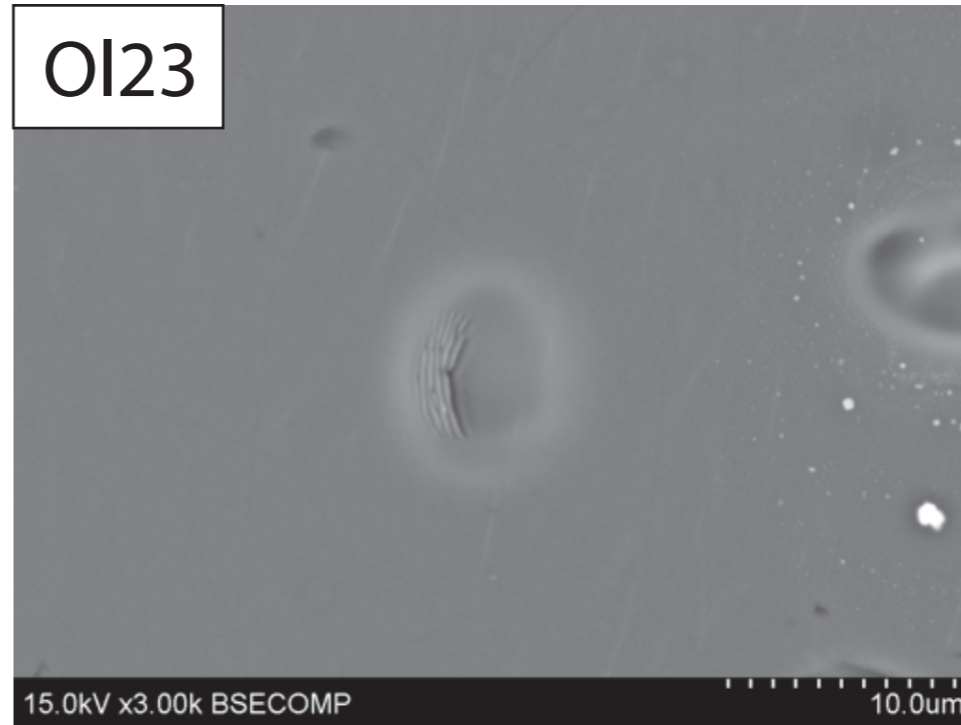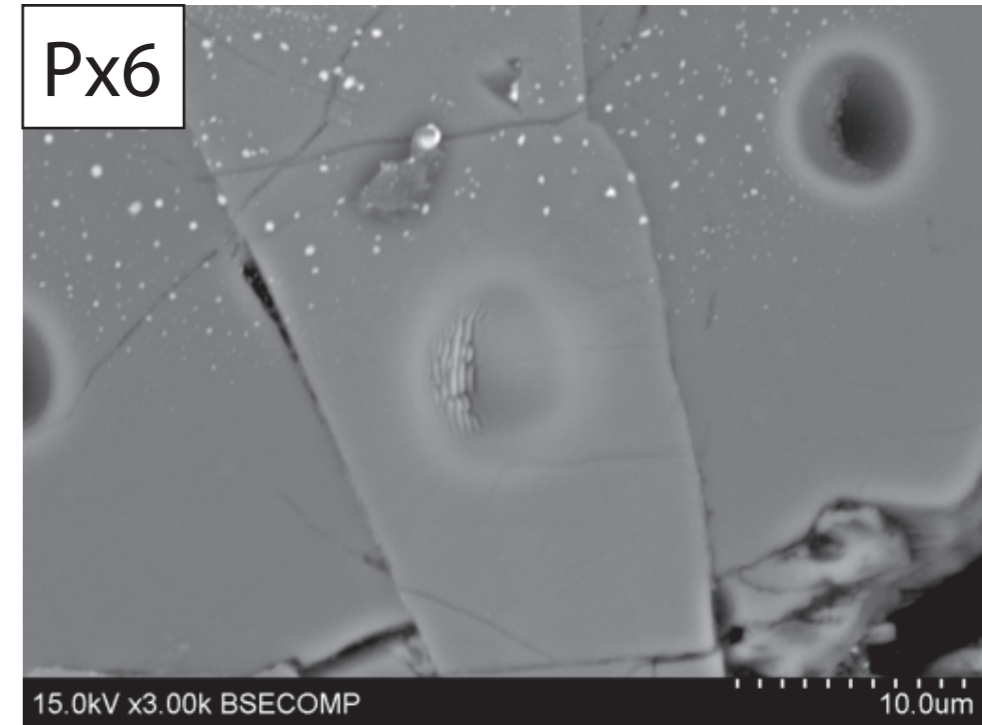



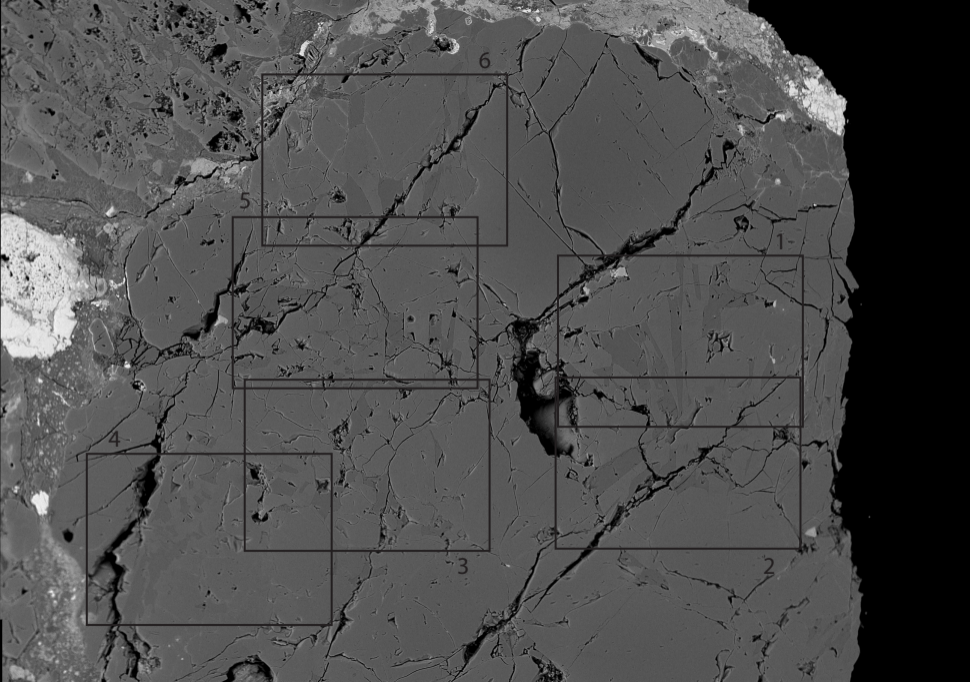

6

5

1

4

3

2

1

PI #3

PI #5

2

○  
PI #2

15.0kV x400 BSE3D

100um

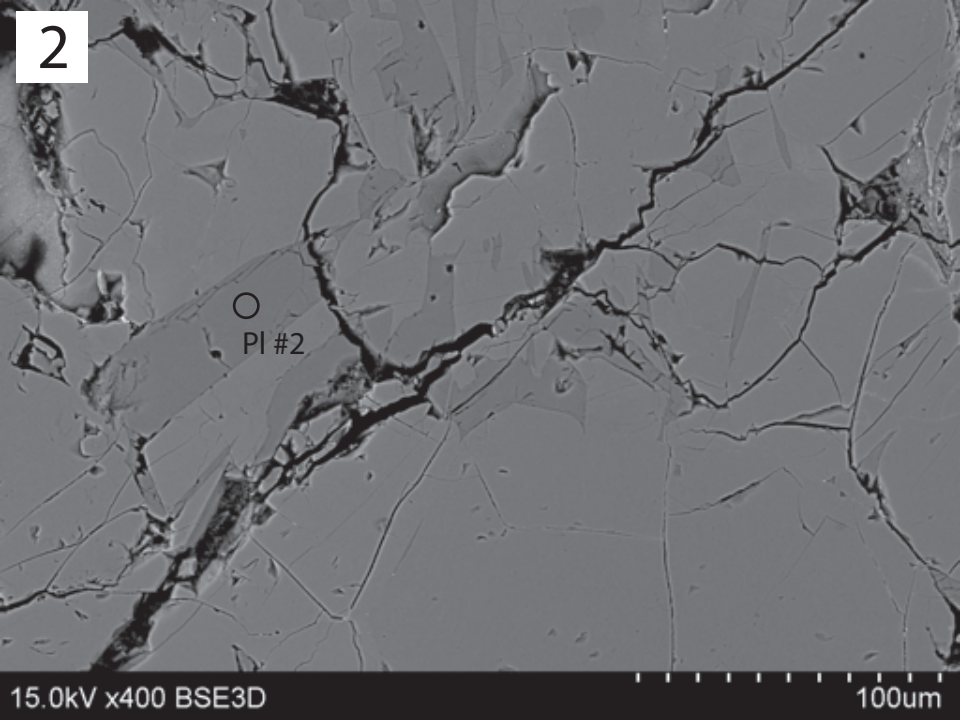

3

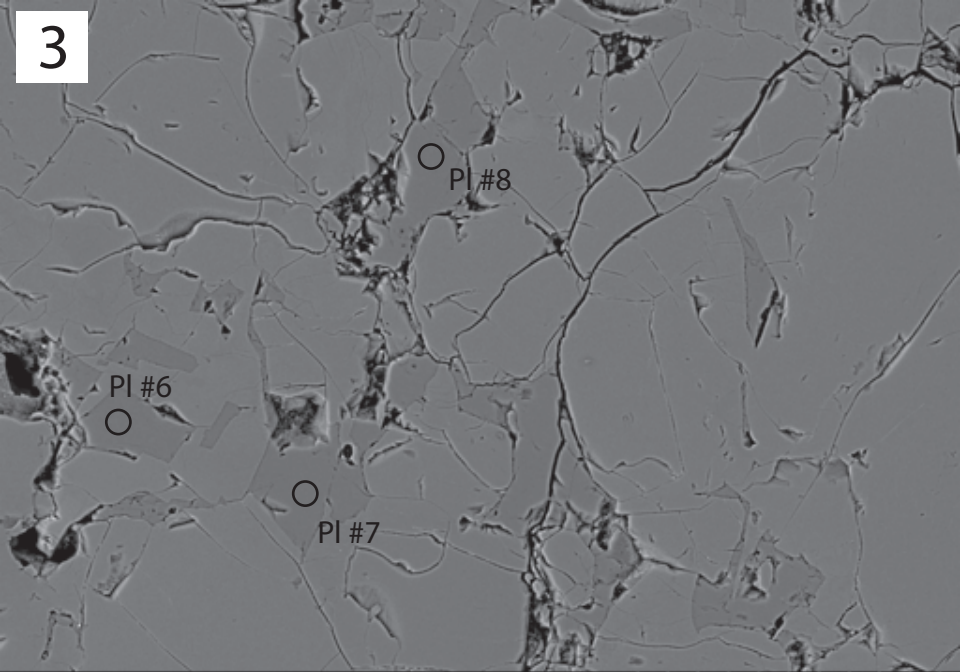

PI #6

PI #8

PI #7

4

PI #9

5

PI #15

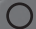

PI #14

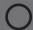

6

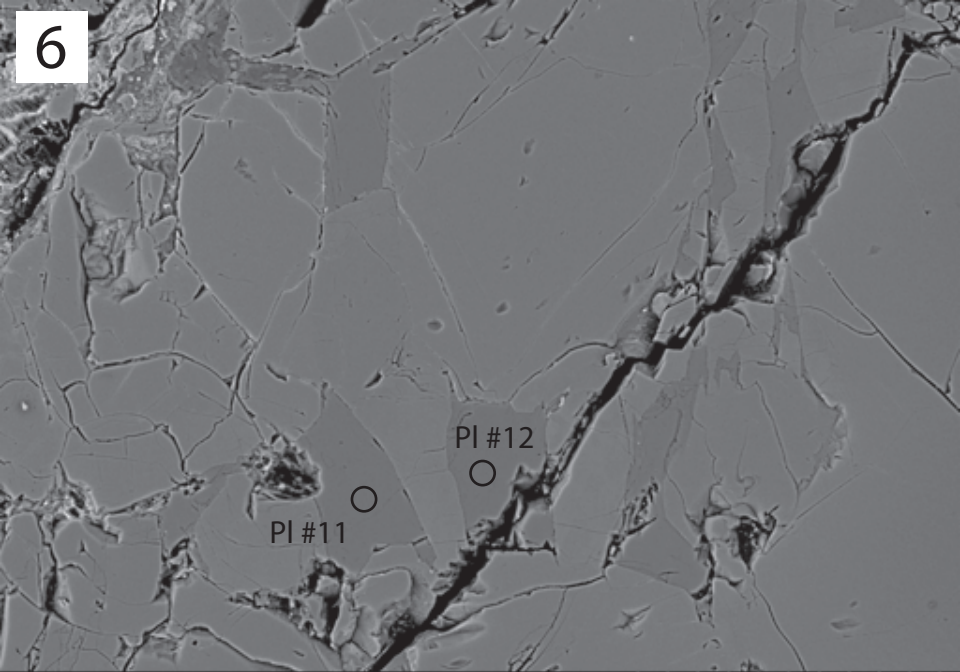

15.0kV x400 BSE3D

100um

# An Al-Mg spots:

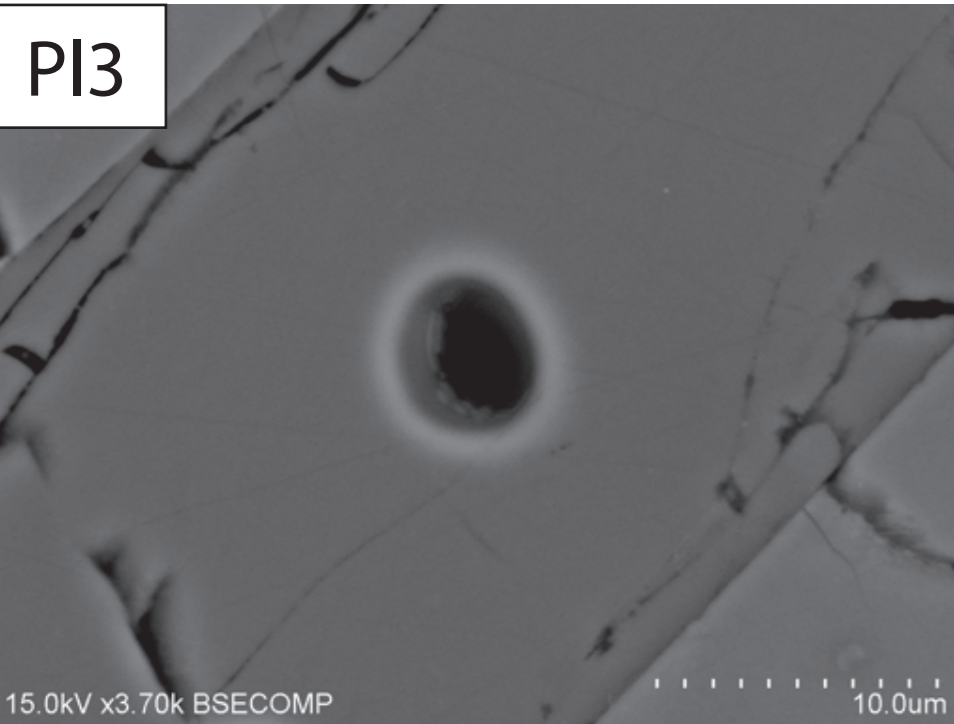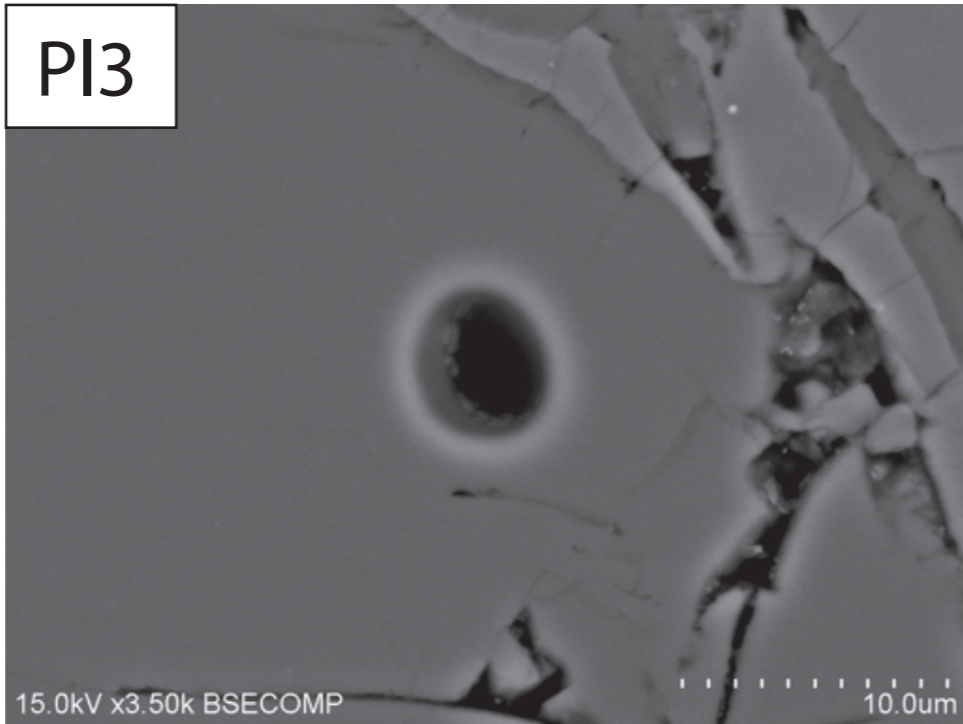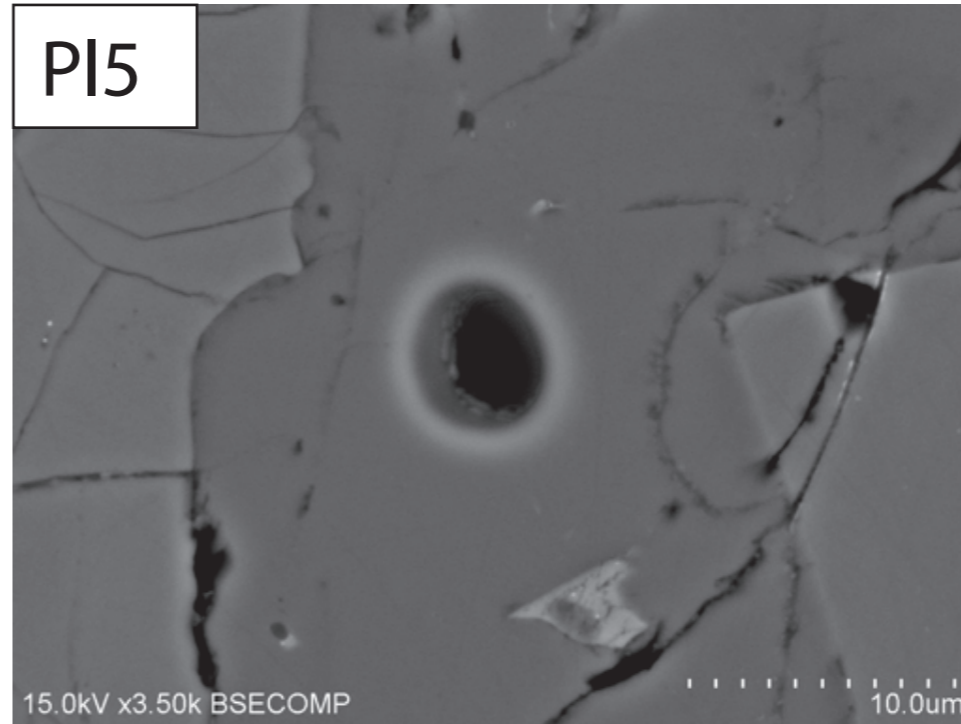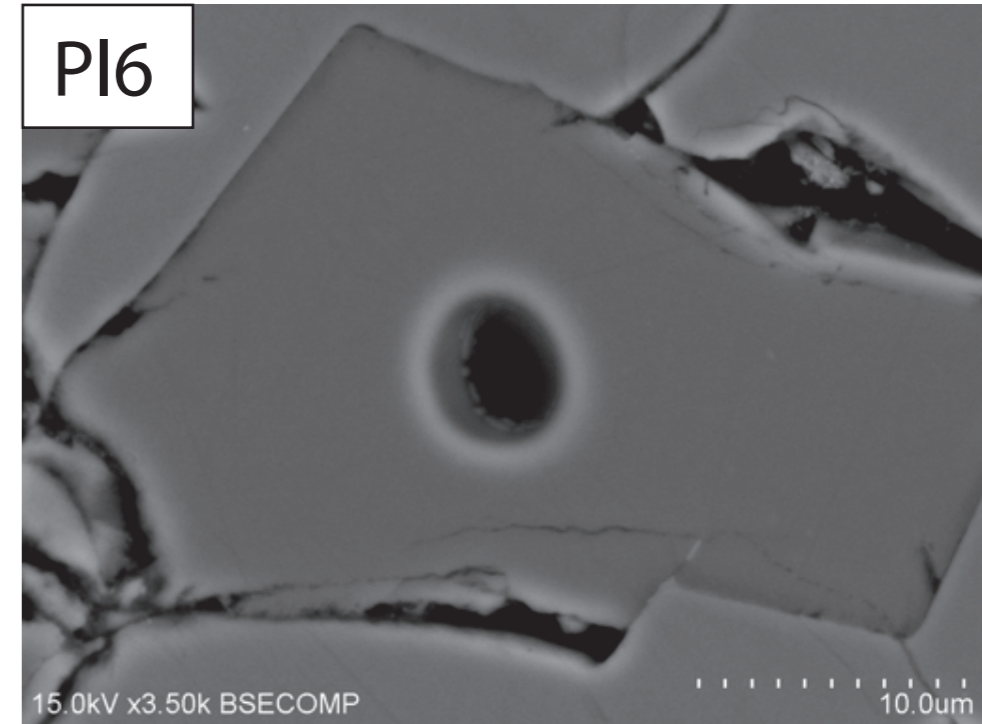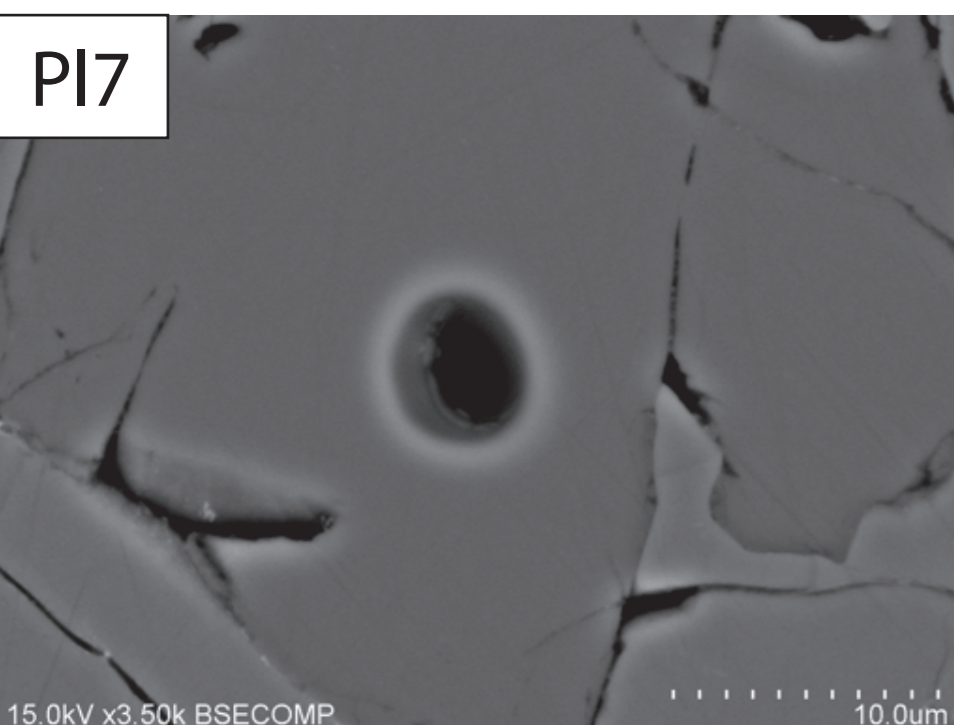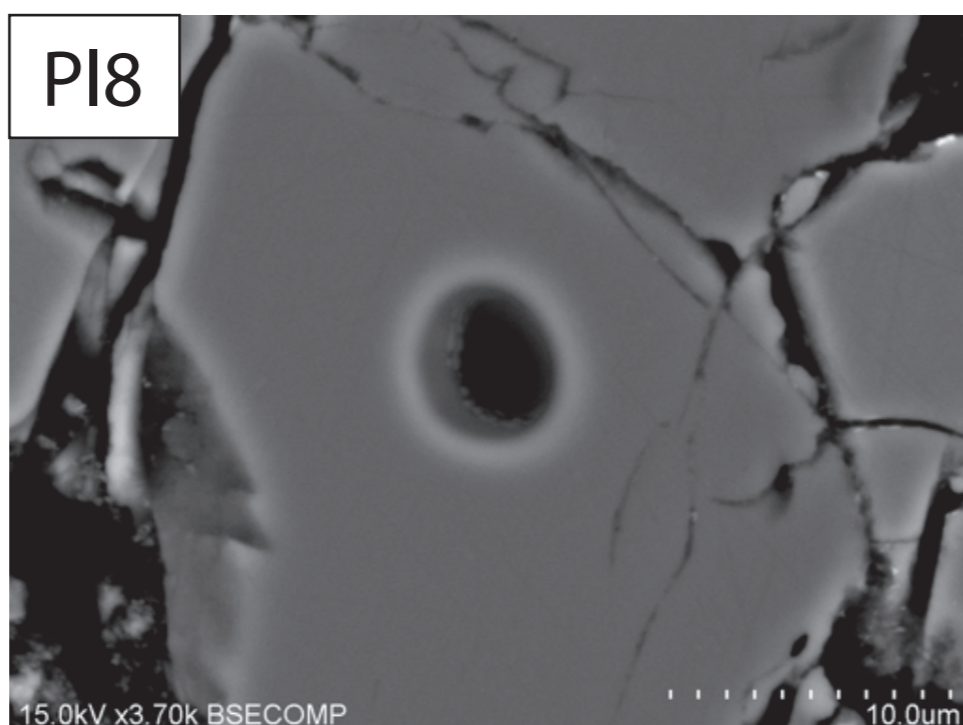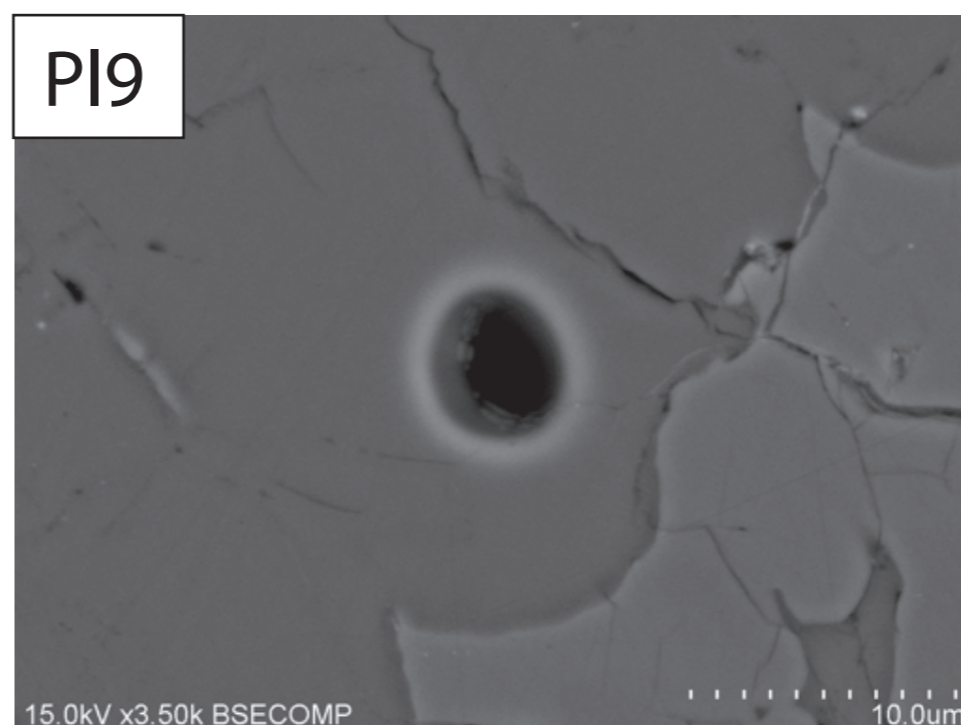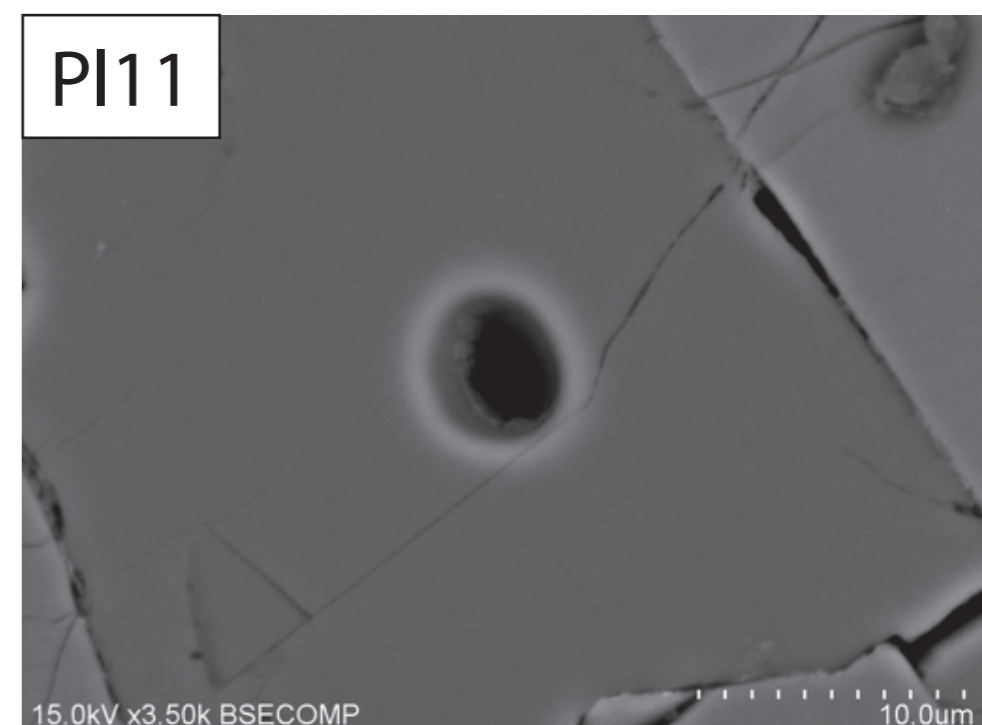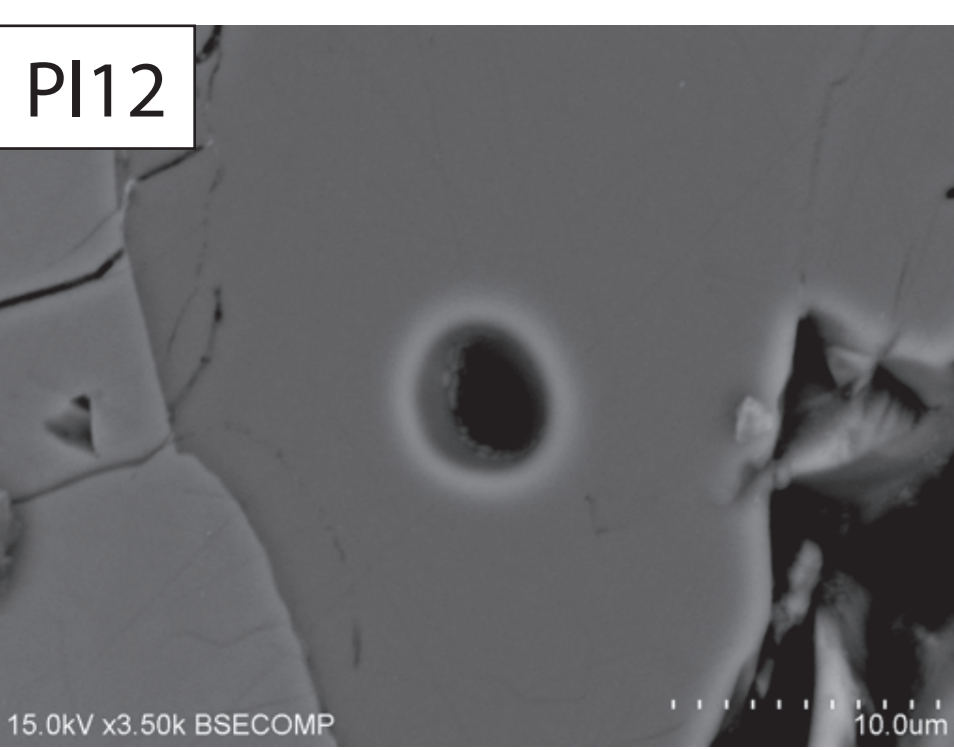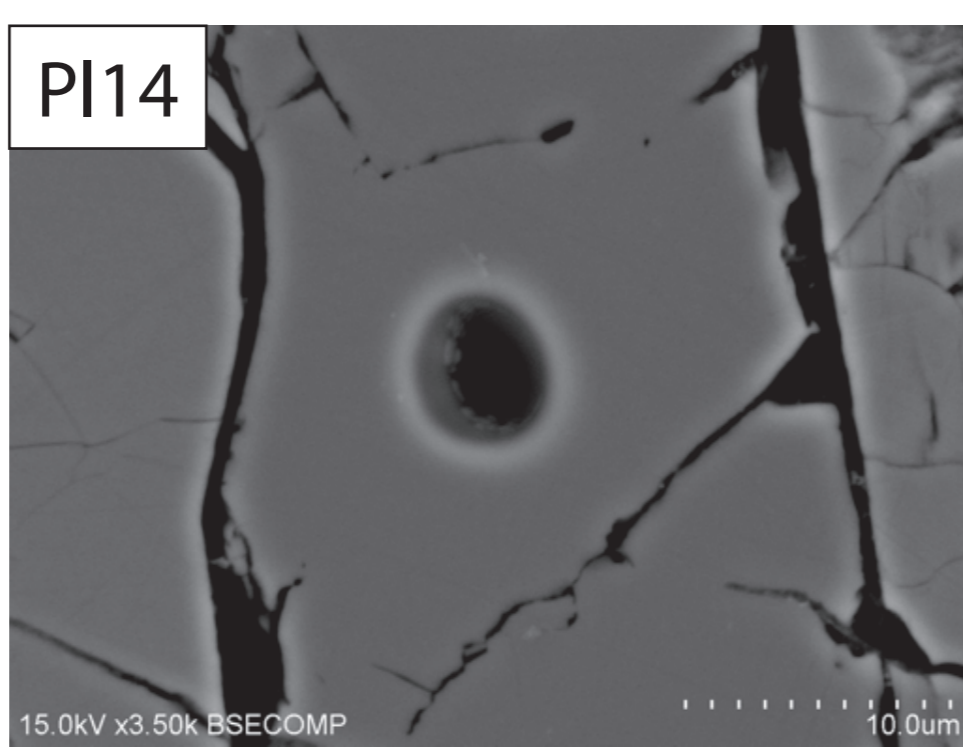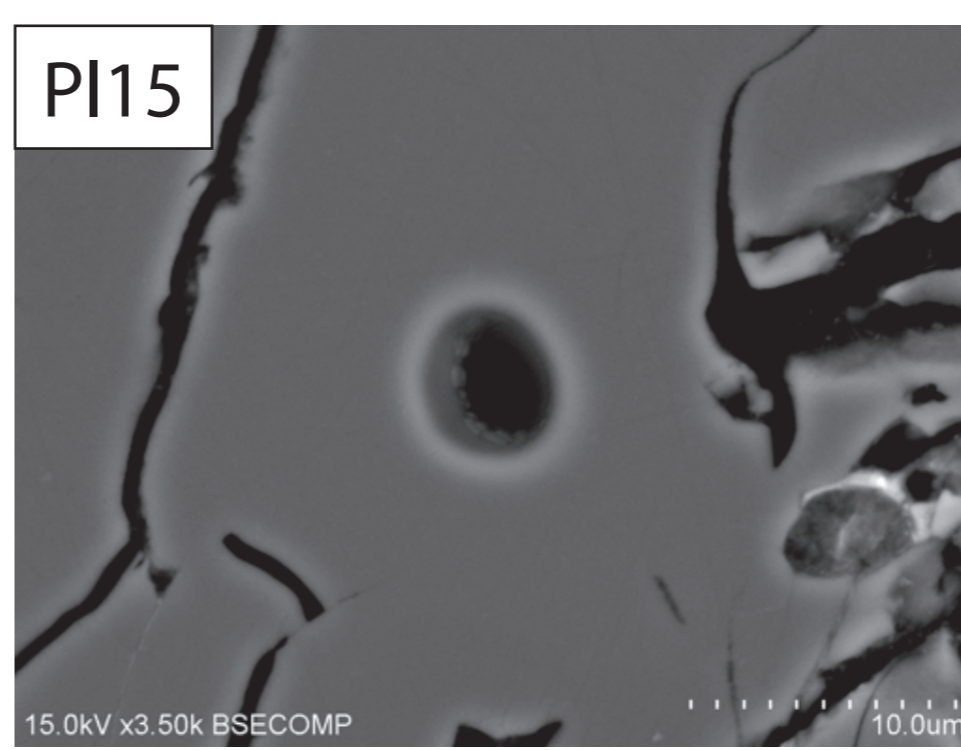

Supplement: NIHMS1757327-supplement-EA6-11.pdf [file NIHMS1757327-supplement-EA6-11.pdf]
