# Supplementary material
Source: PubMed Central journal article supplement (PMC8740609)

Electronic Annex EA 6-12: Location of SIMS analyses for NWA 8276 c69  
New constraints from  $^{26}\text{Al}$ - $^{26}\text{Mg}$  chronology of anorthite  
bearing chondrules in unequilibrated ordinary chondrites  
*Guillaume Siron, Kohei Fukuda, Makoto Kimura, and Noriko T. Kita*

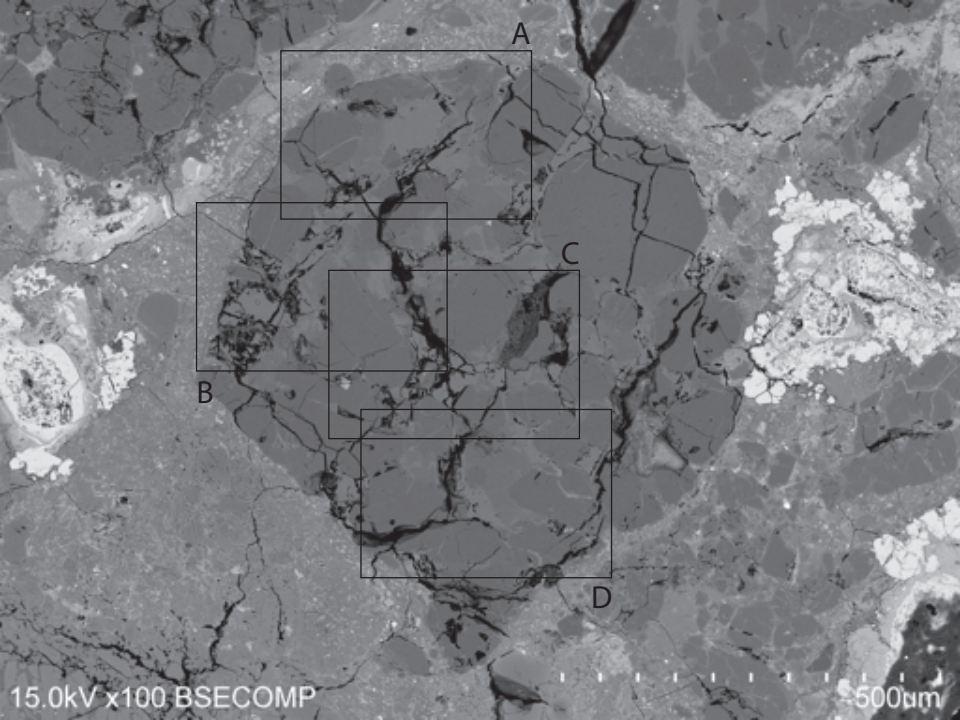

A

C

B

D

15.0kV x100 BSECOMP

500µm

A

An #1

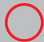

Ol #6

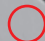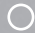

**B**

OI #4

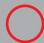

OI #3

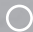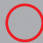

C

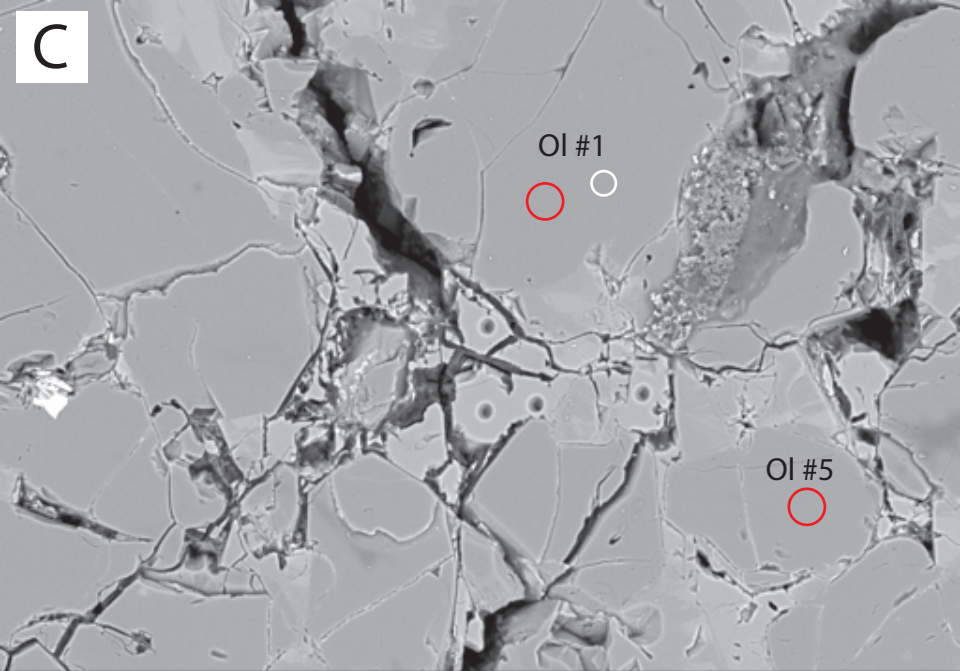

OI #1

OI #5

D

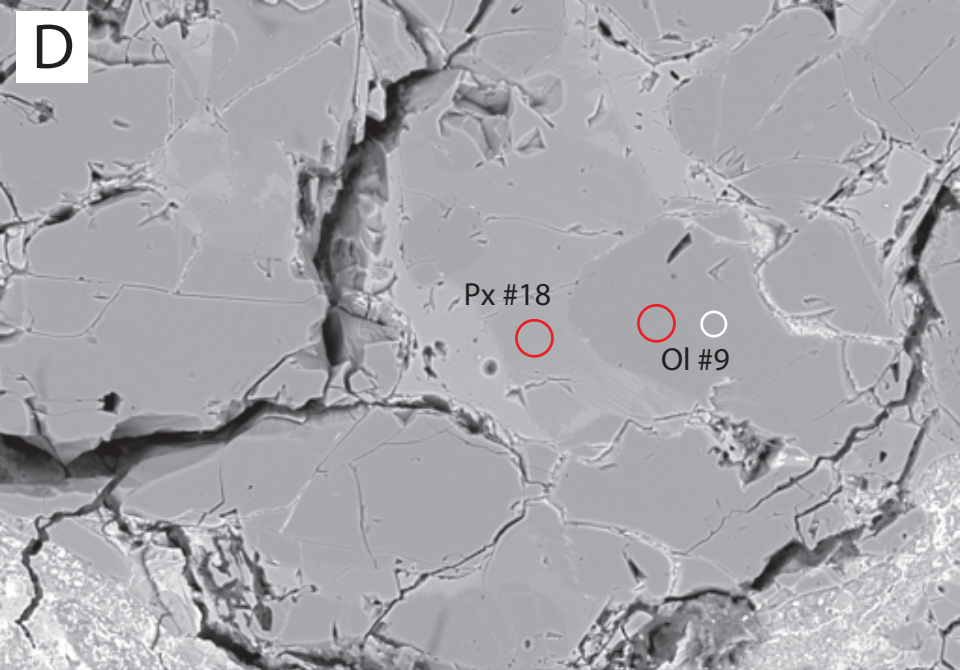

Px #18

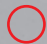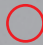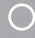

Ol #9

Ol-Px-An oxygen spots:

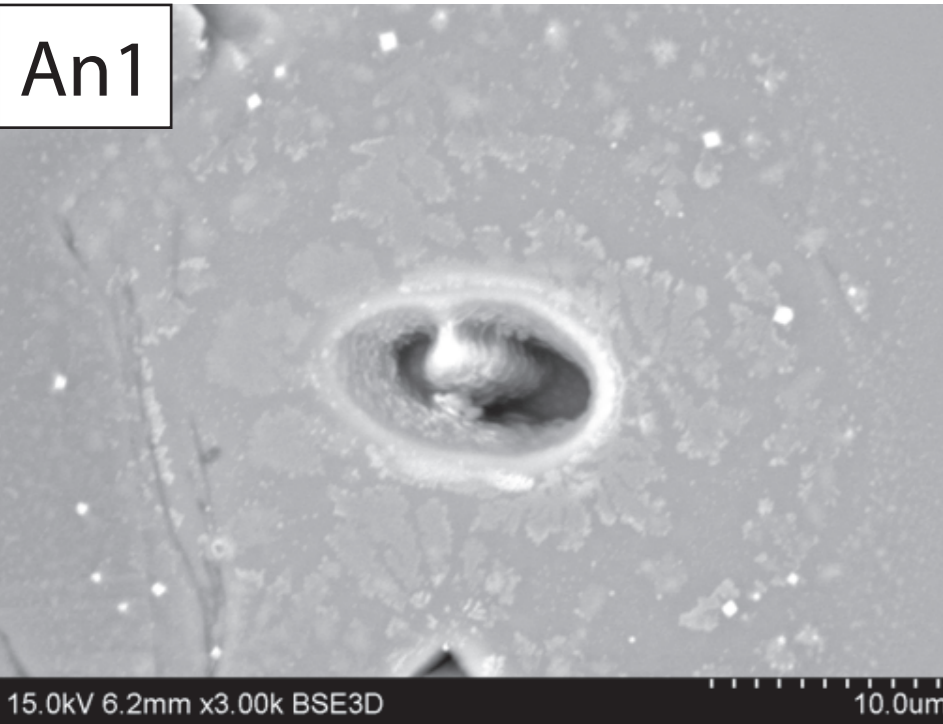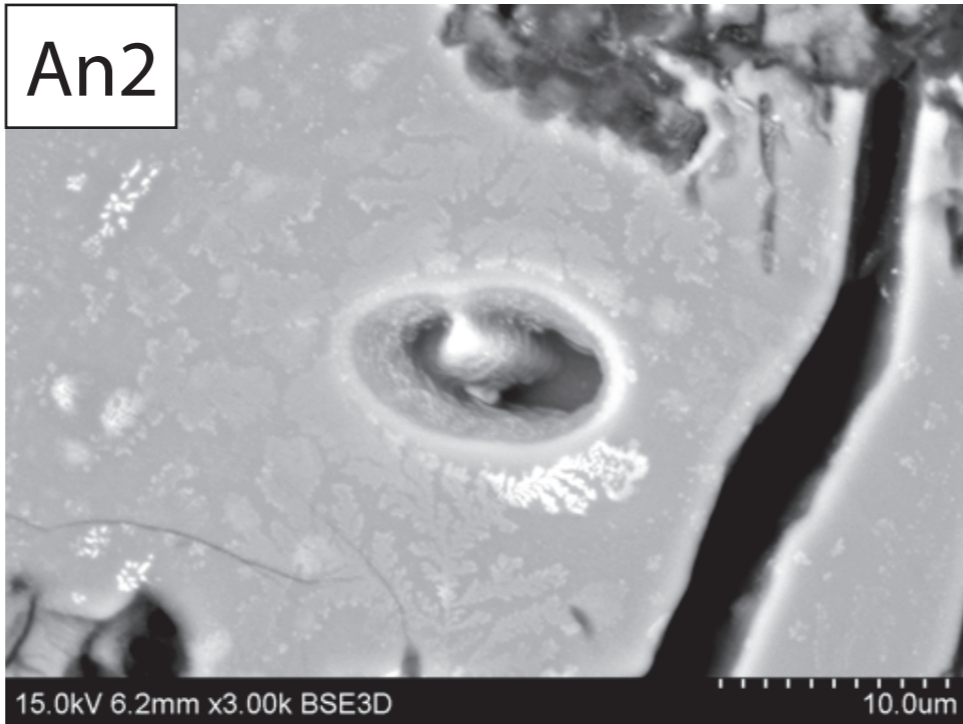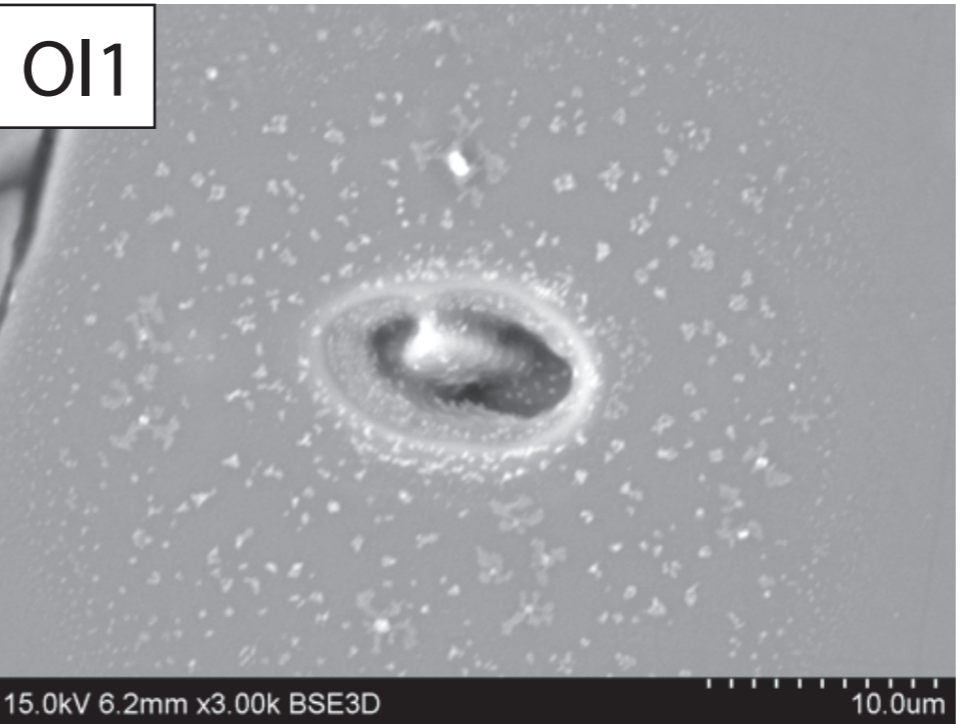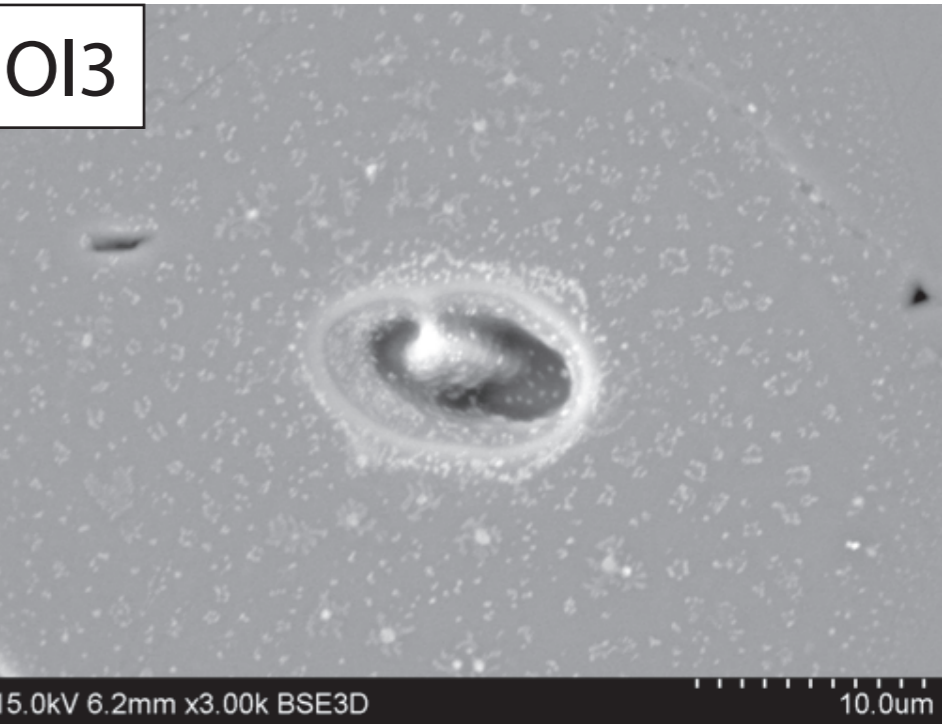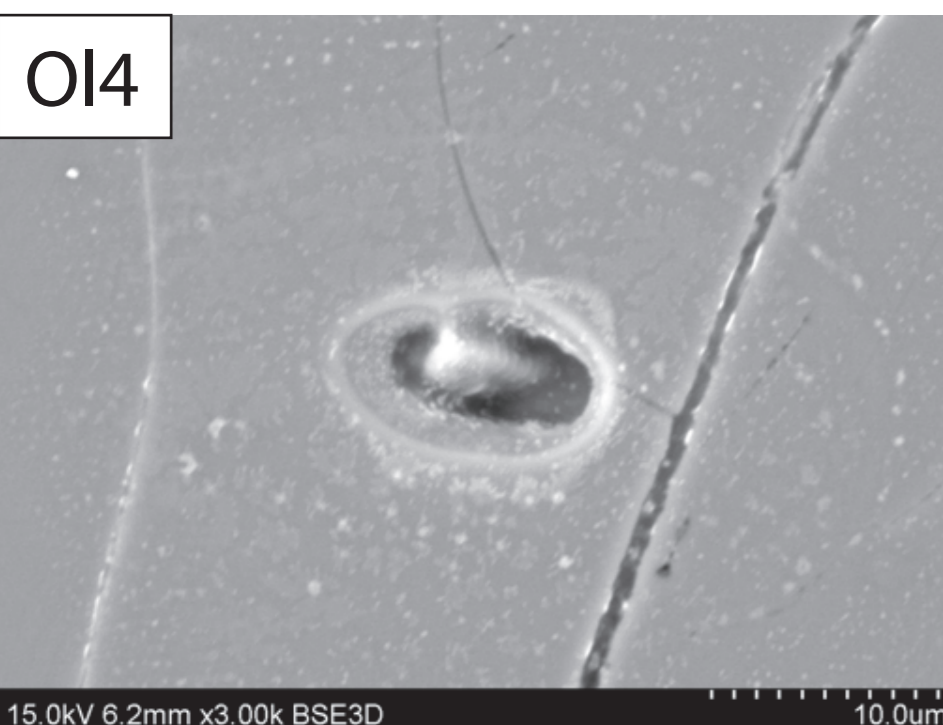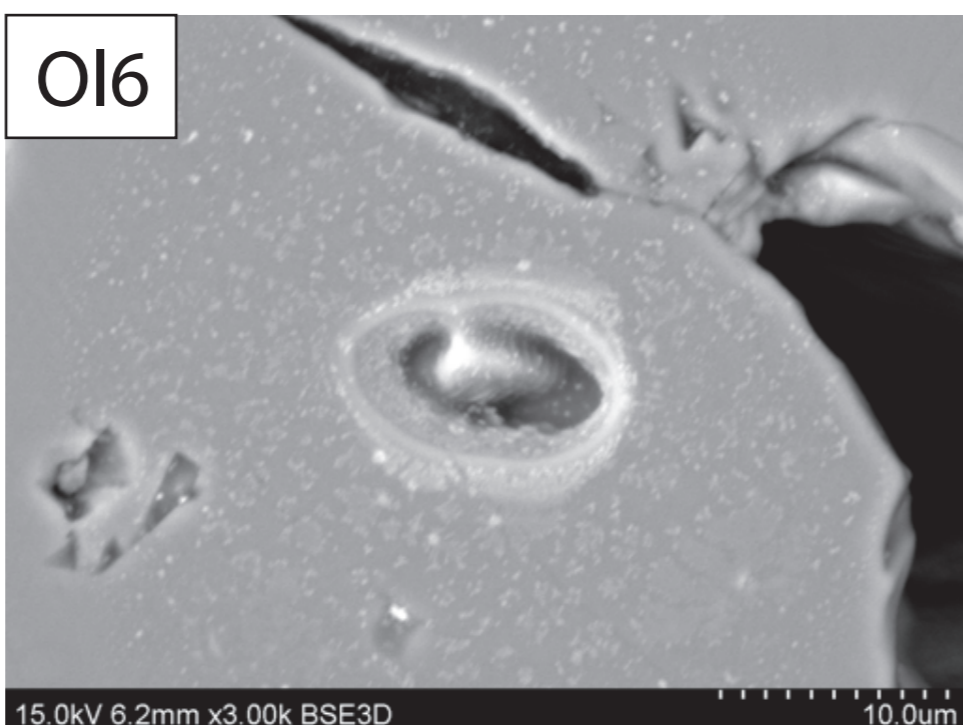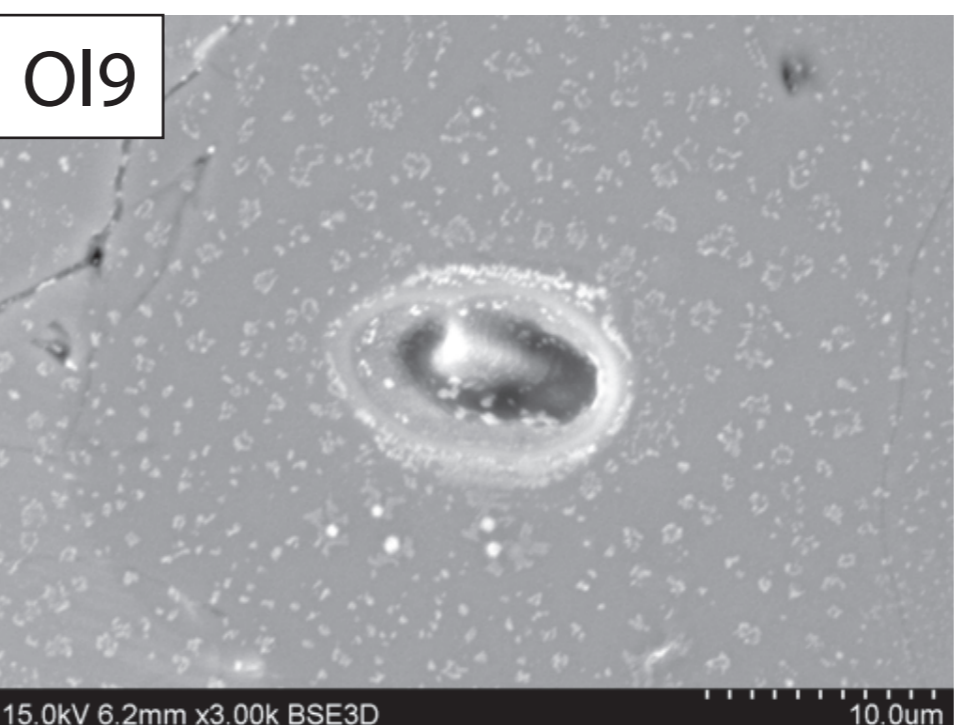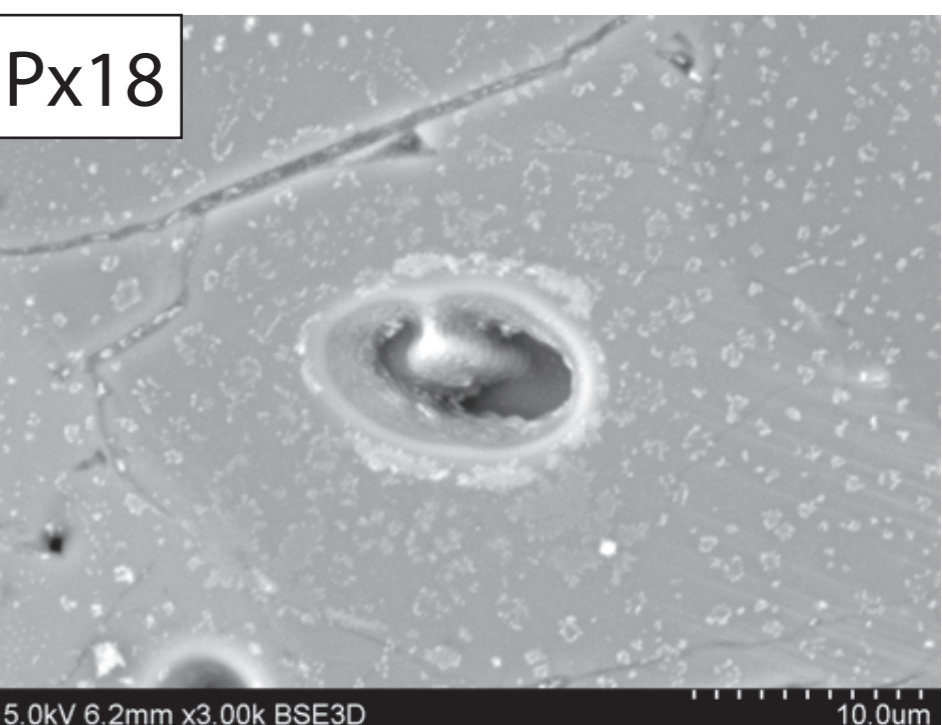

Ol-Px Al-Mg spots:

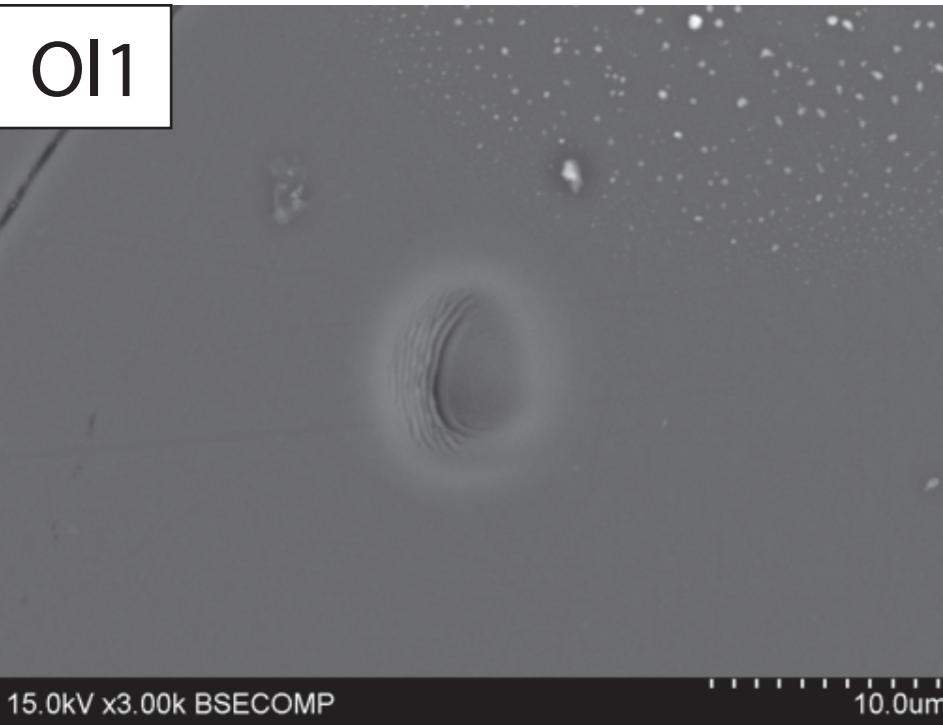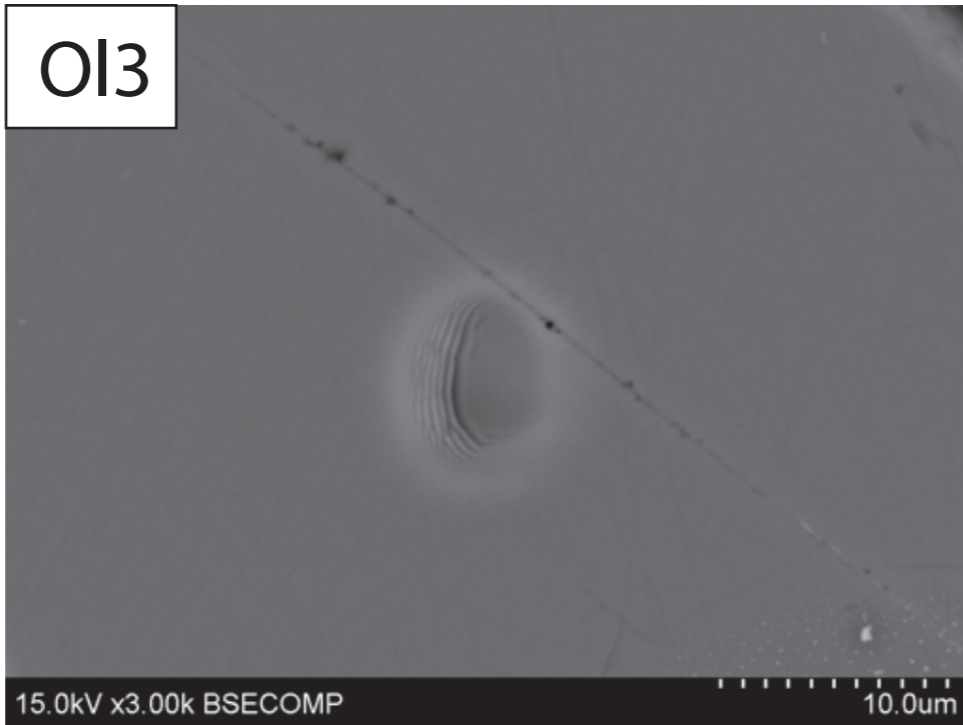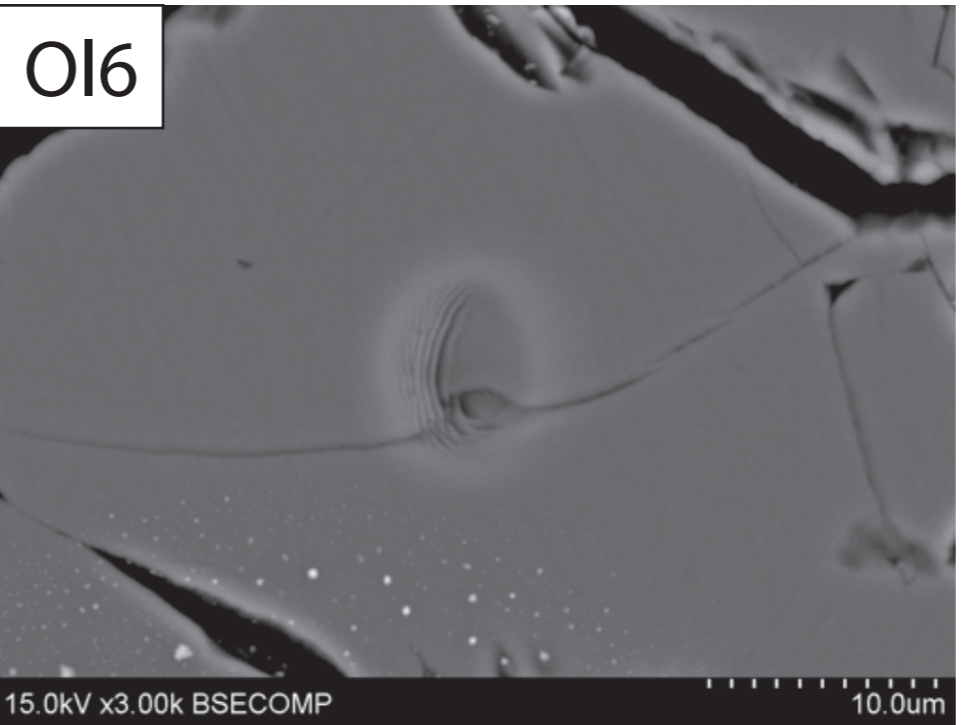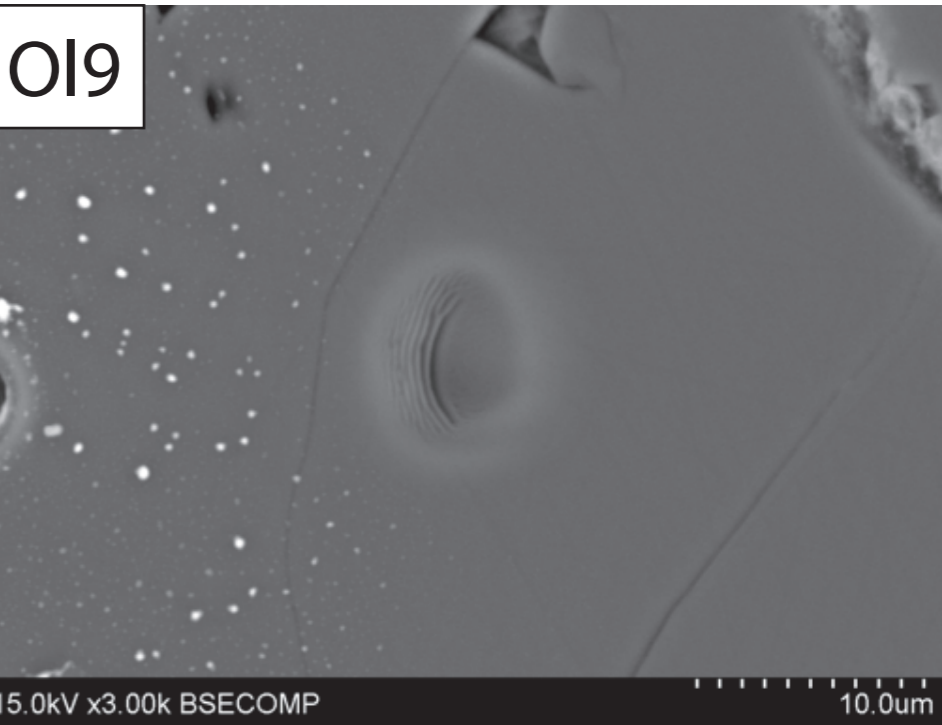

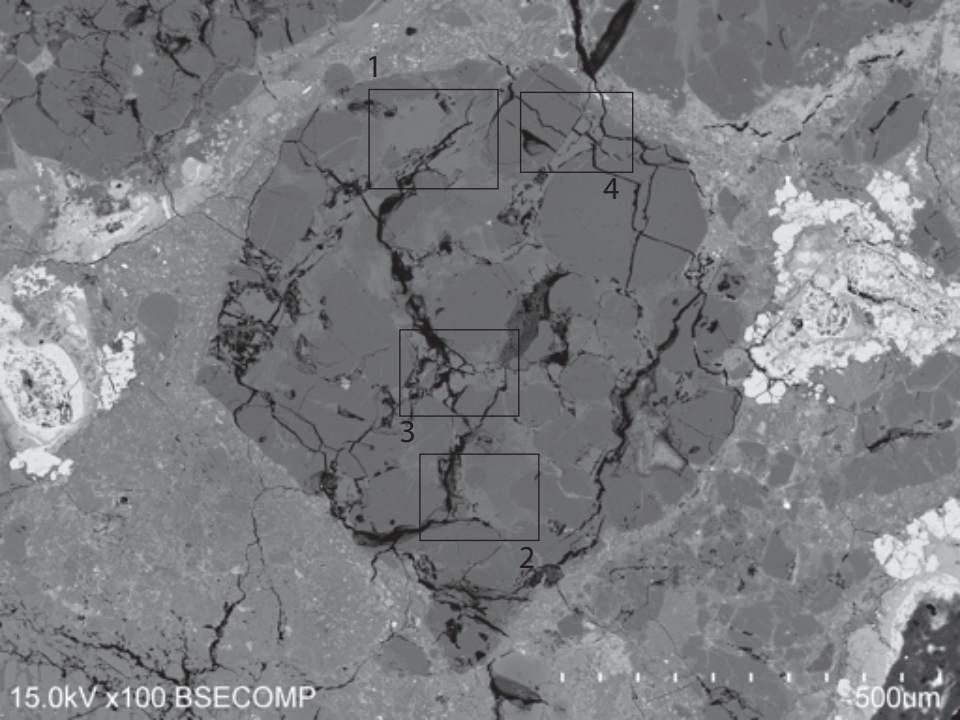

1

4

3

2



1

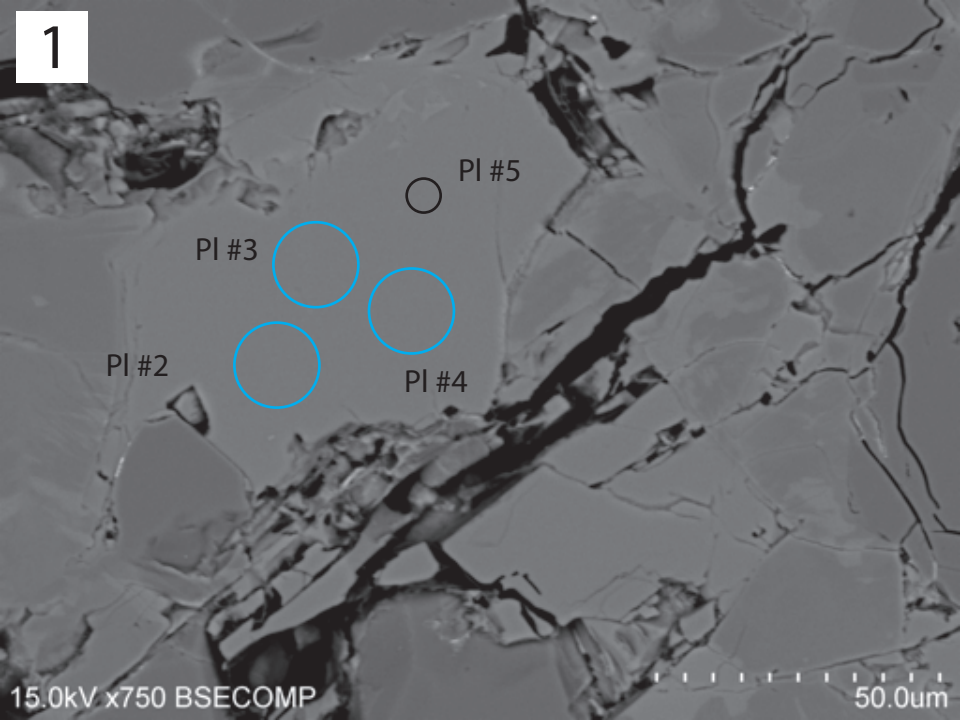

15.0kV x750 BSECOMP

50.0um

2

○  
PI #21

3

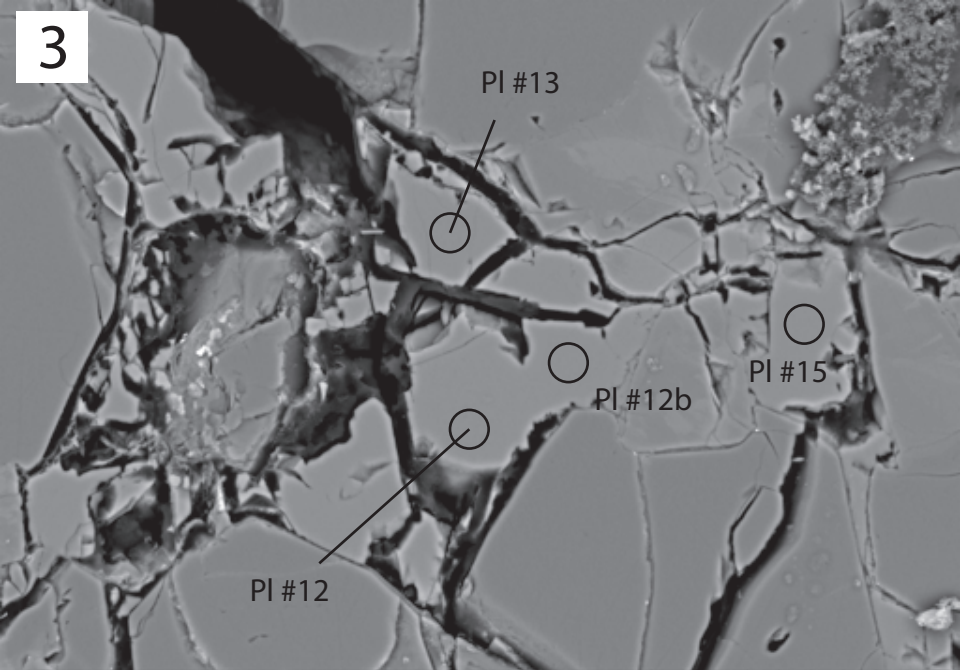

PI #13

PI #15

PI #12b

PI #12

50.0um

15.0kV x850 BSECOMP

4

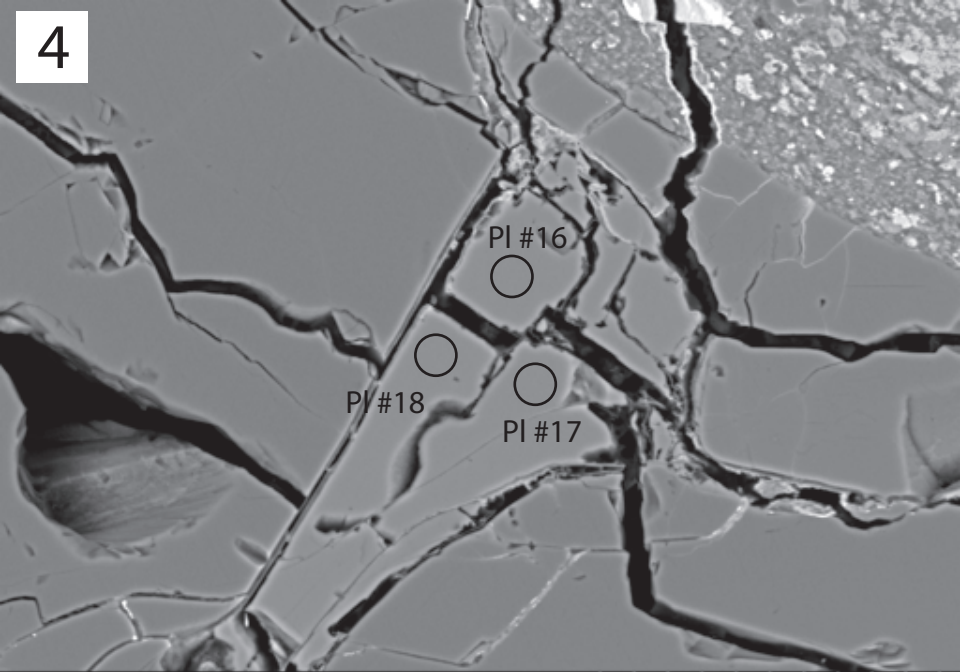

15.0kV x900 BSECOMP

50.0um

An FC-EM Al-Mg spots:

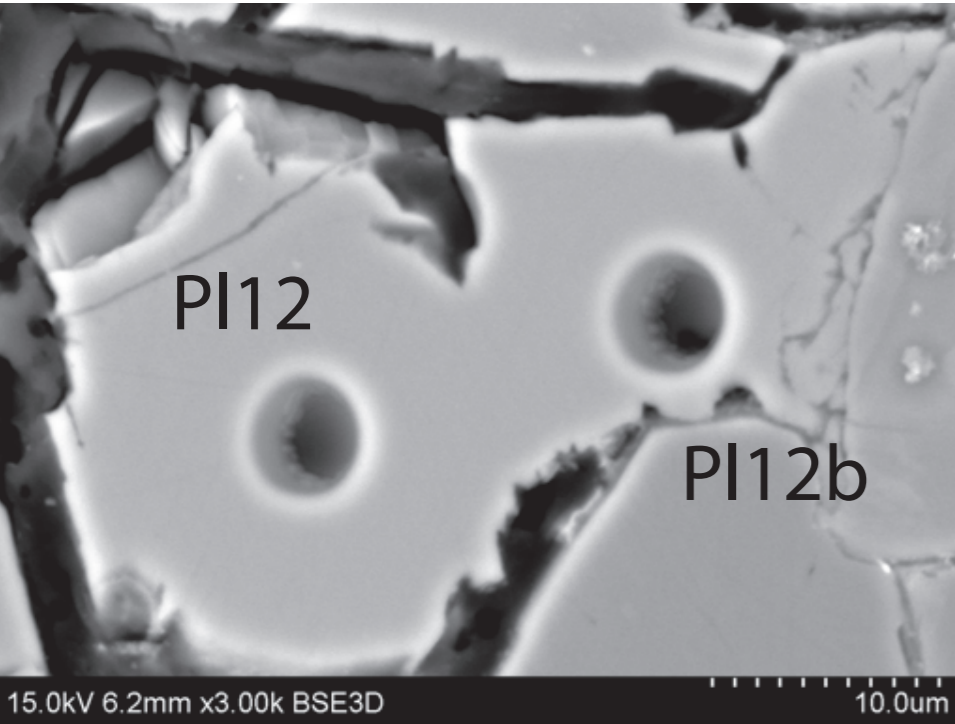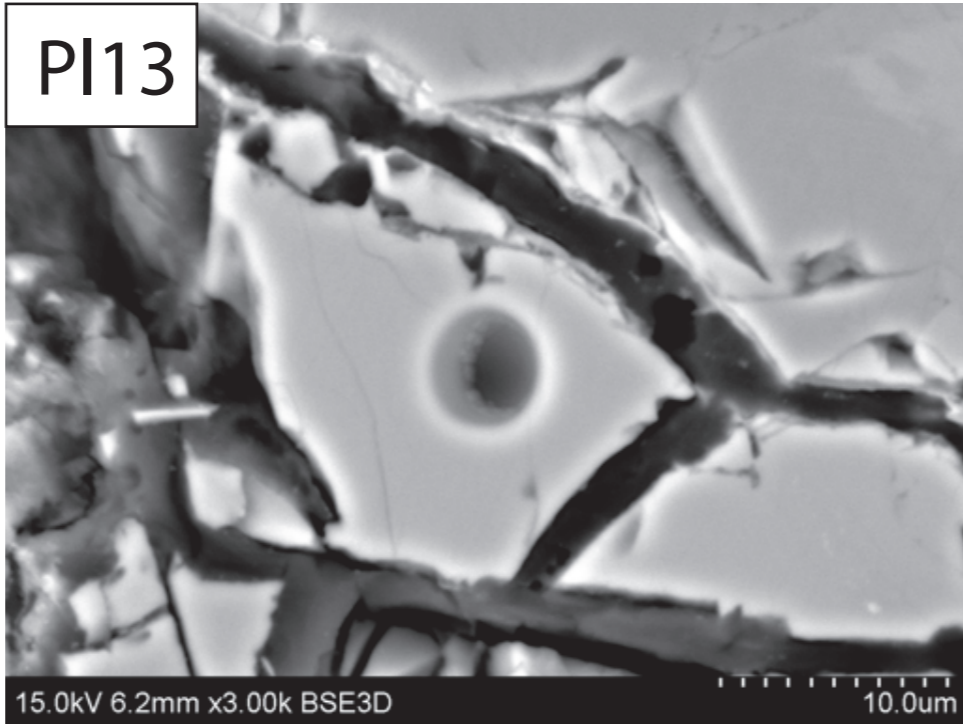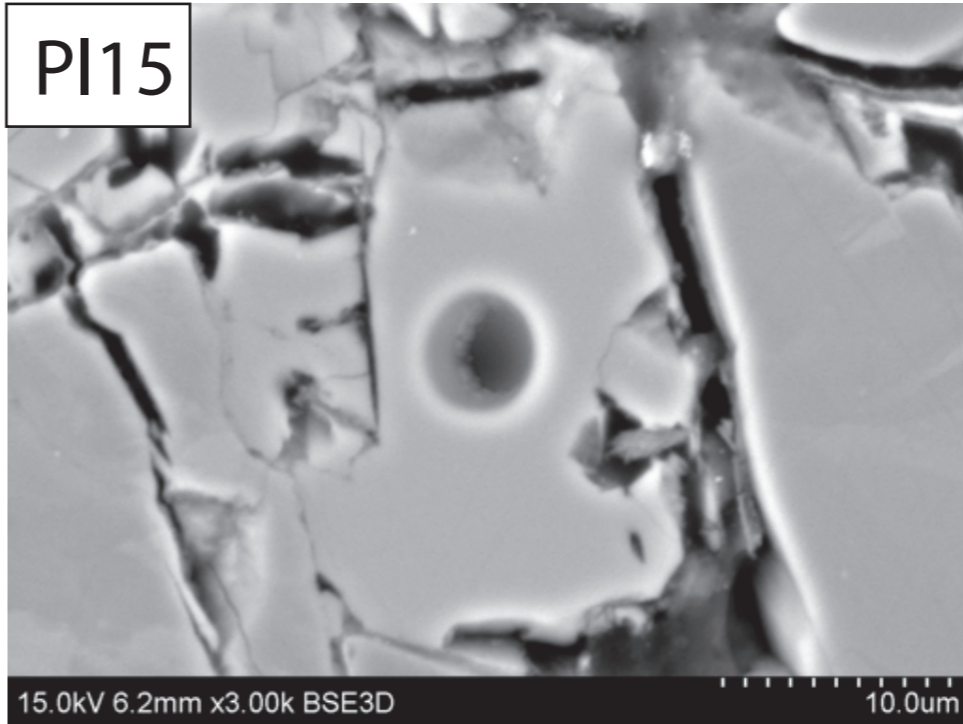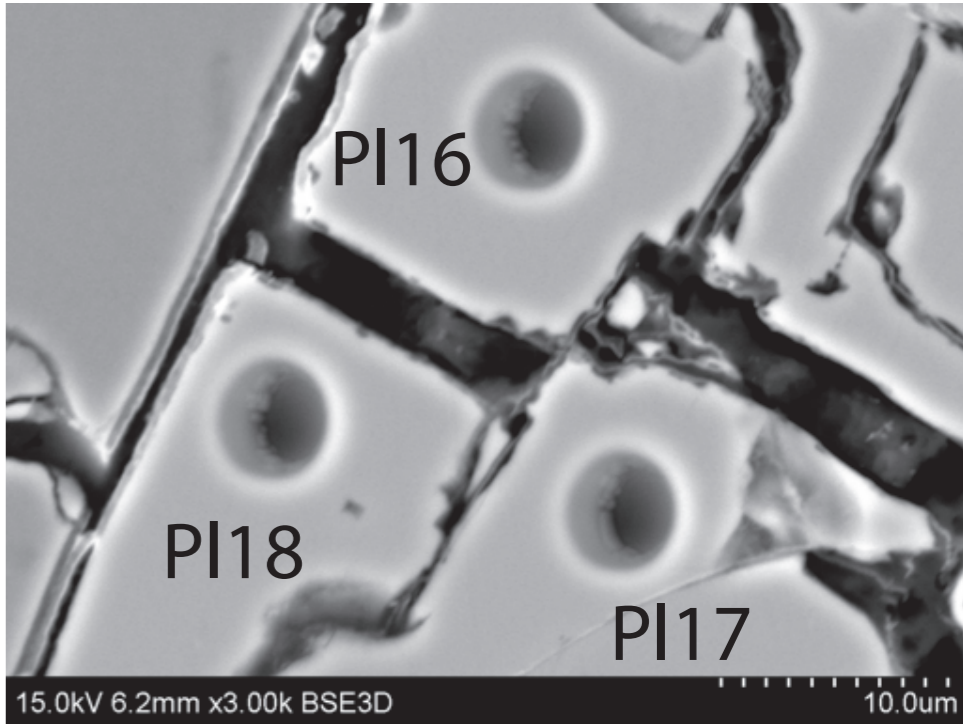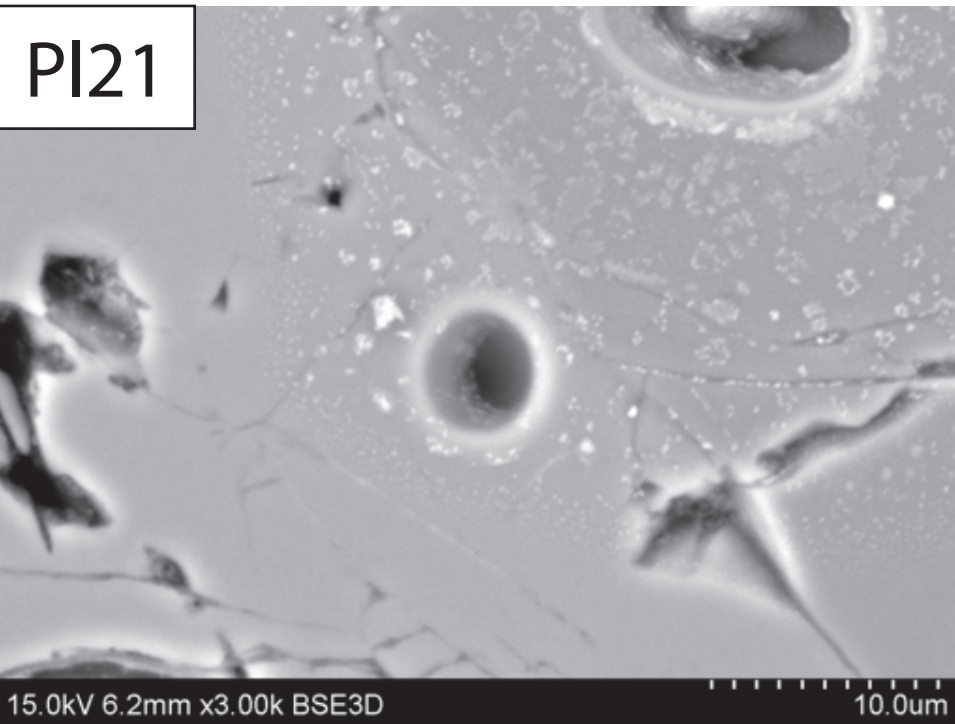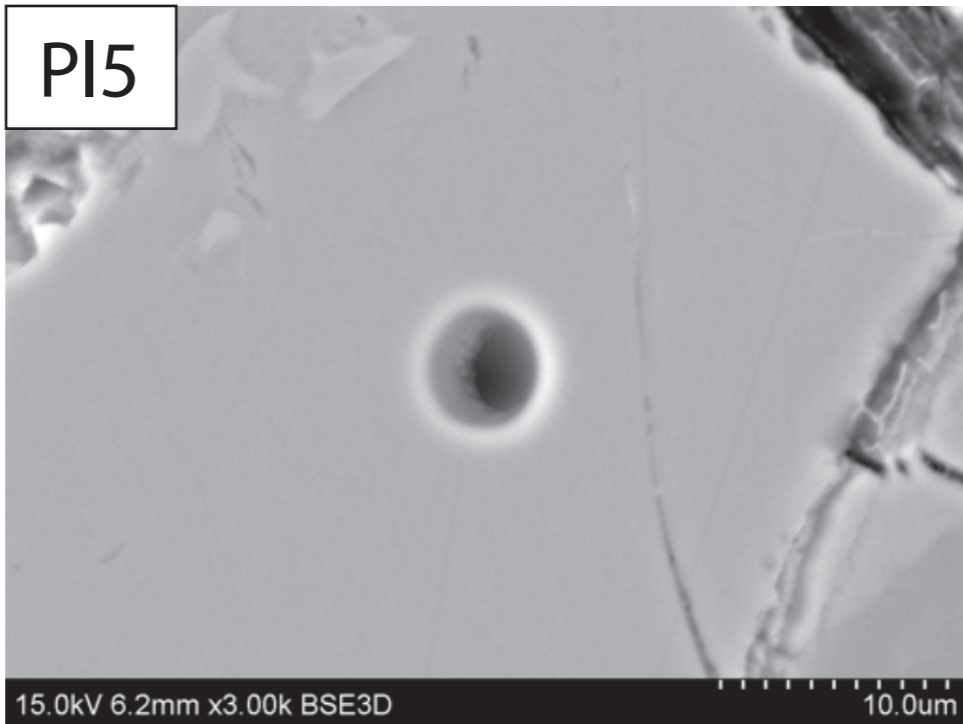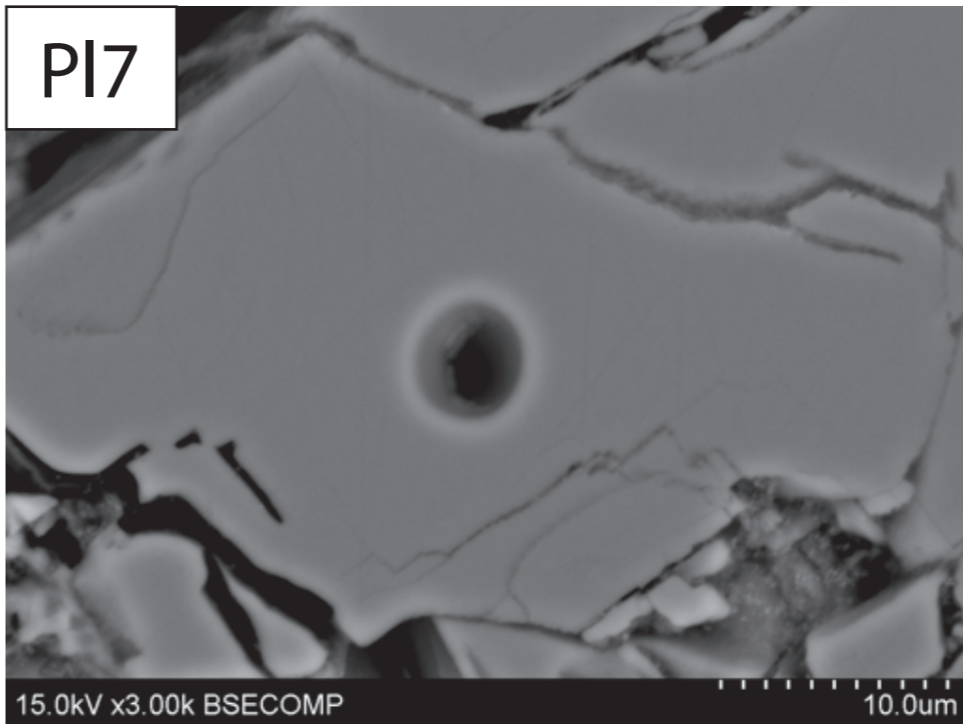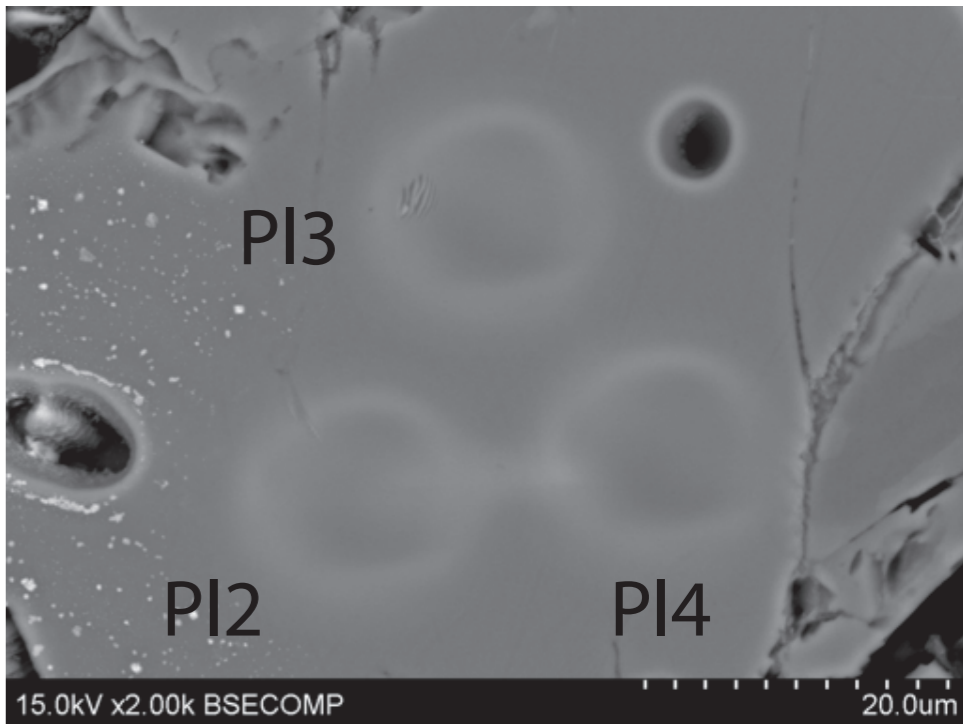

Supplement: NIHMS1757327-supplement-EA6-12.pdf [file NIHMS1757327-supplement-EA6-12.pdf]
