# Supplementary material
Source: PubMed Central journal article supplement (PMC8740609)

Electronic Annex EA 6-13: Location of SIMS analyses for NWA 8276 c87  
New constraints from  $^{26}\text{Al}$ - $^{26}\text{Mg}$  chronology of anorthite  
bearing chondrules in unequilibrated ordinary chondrites  
*Guillaume Siron, Kohei Fukuda, Makoto Kimura, and Noriko T. Kita*

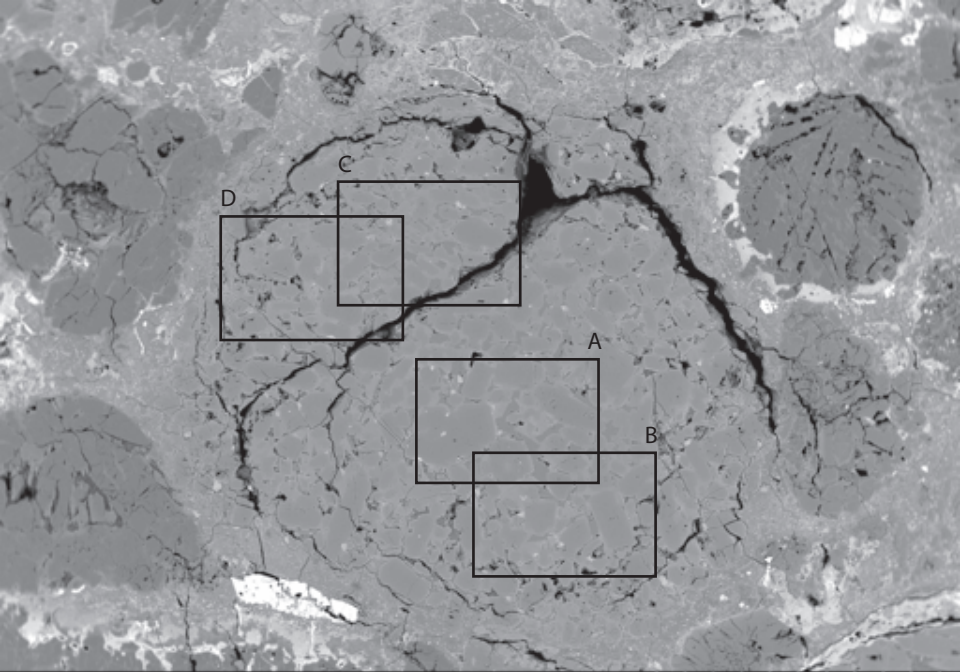

A

Ol #1

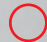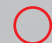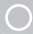

Ol #10

**B**

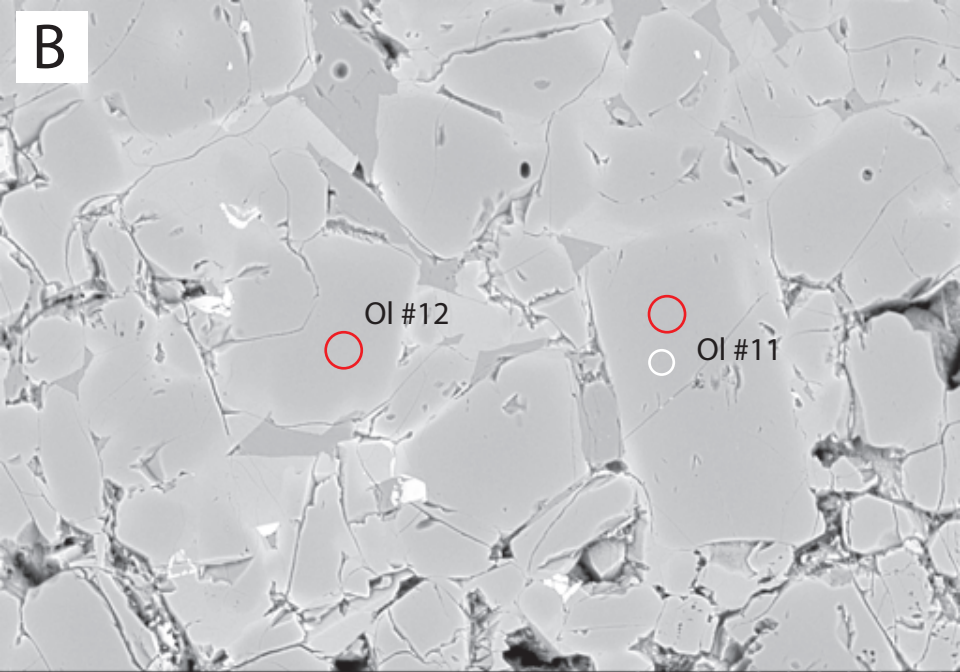

OI #12

OI #11

C

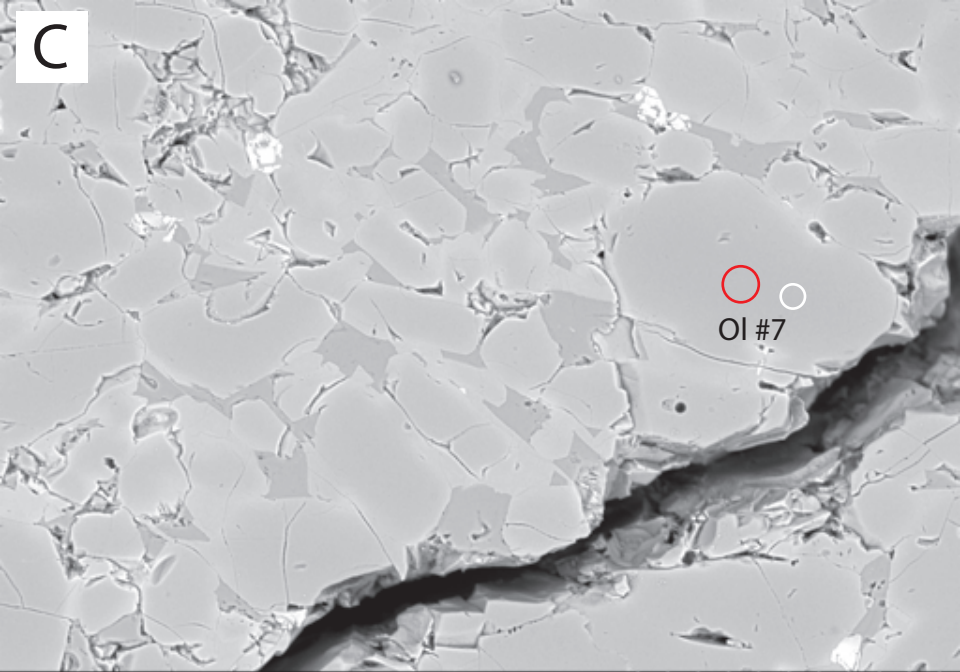

Ol #7

15.0kV 6.2mm x400 BSECOMP

100um

D

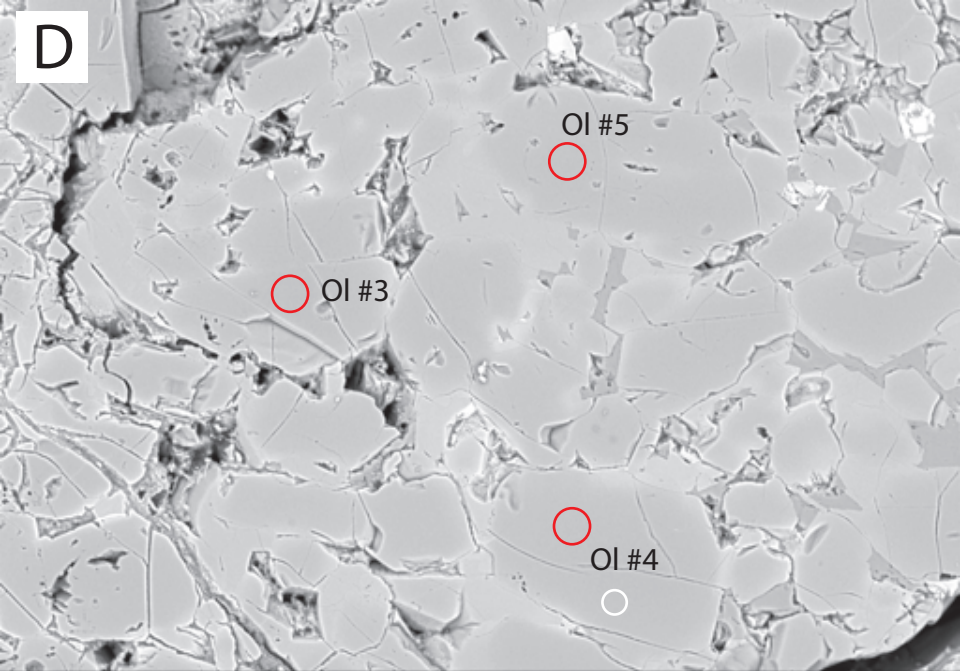

15.0kV 6.2mm x400 BSECOMP

100um

Ol-Px oxygen spots:

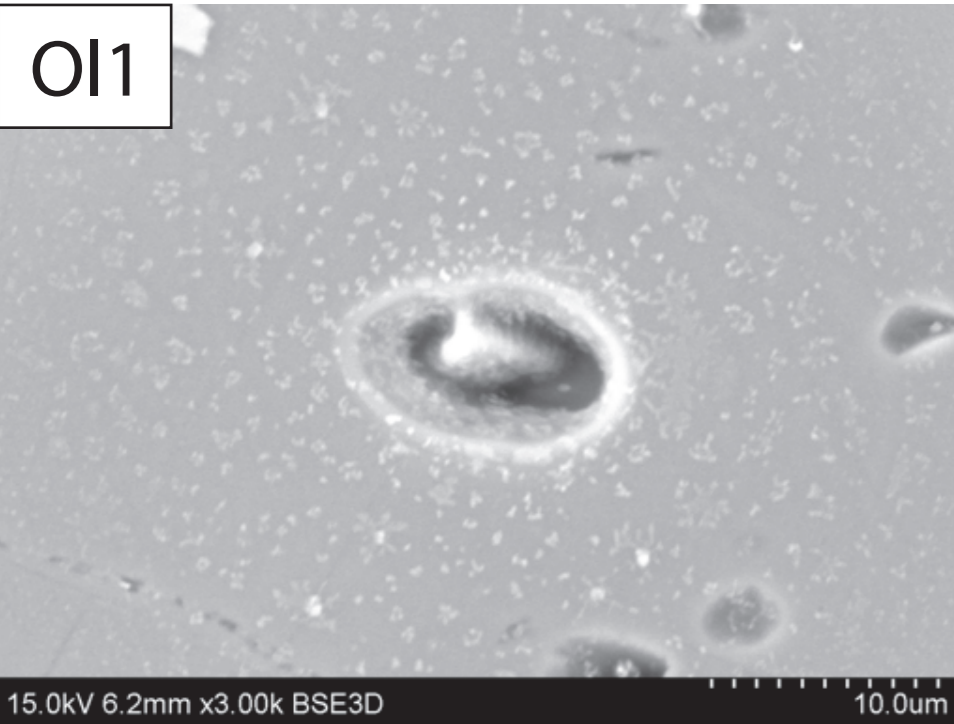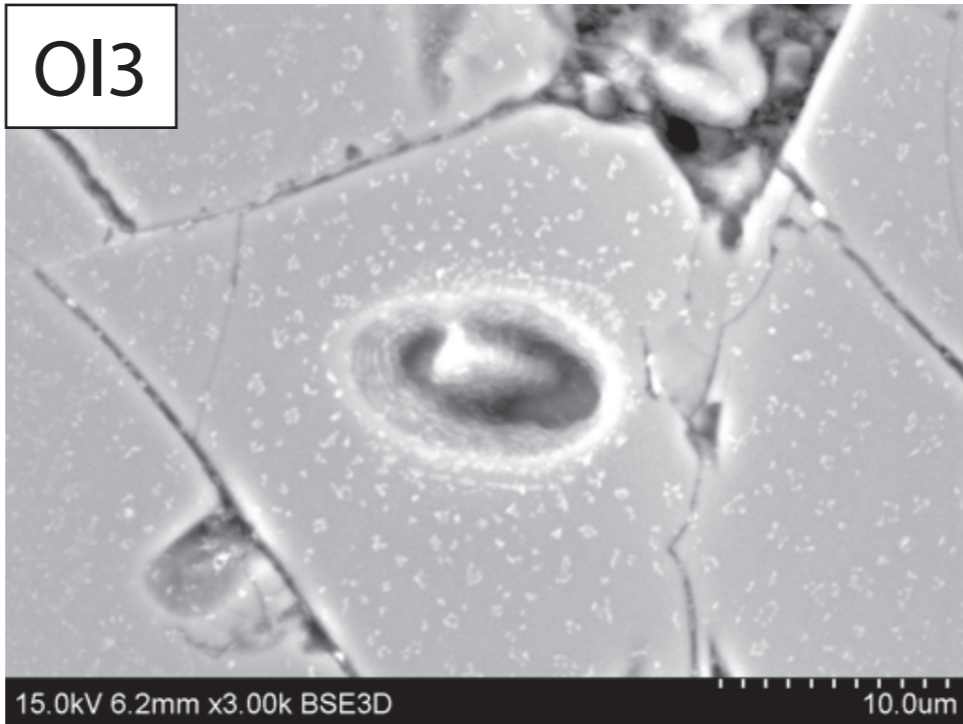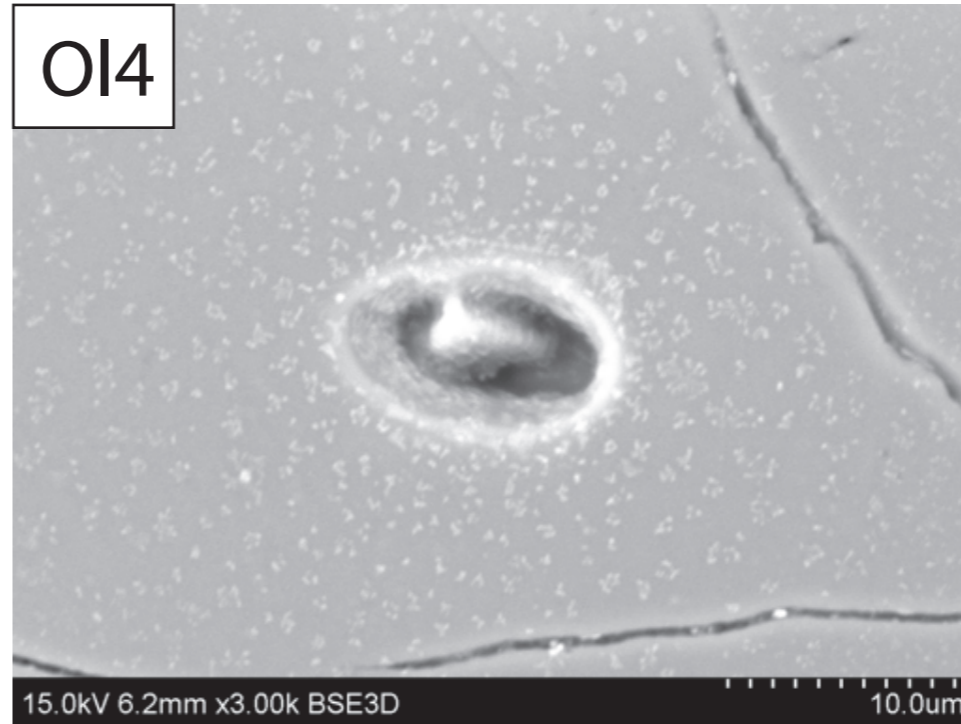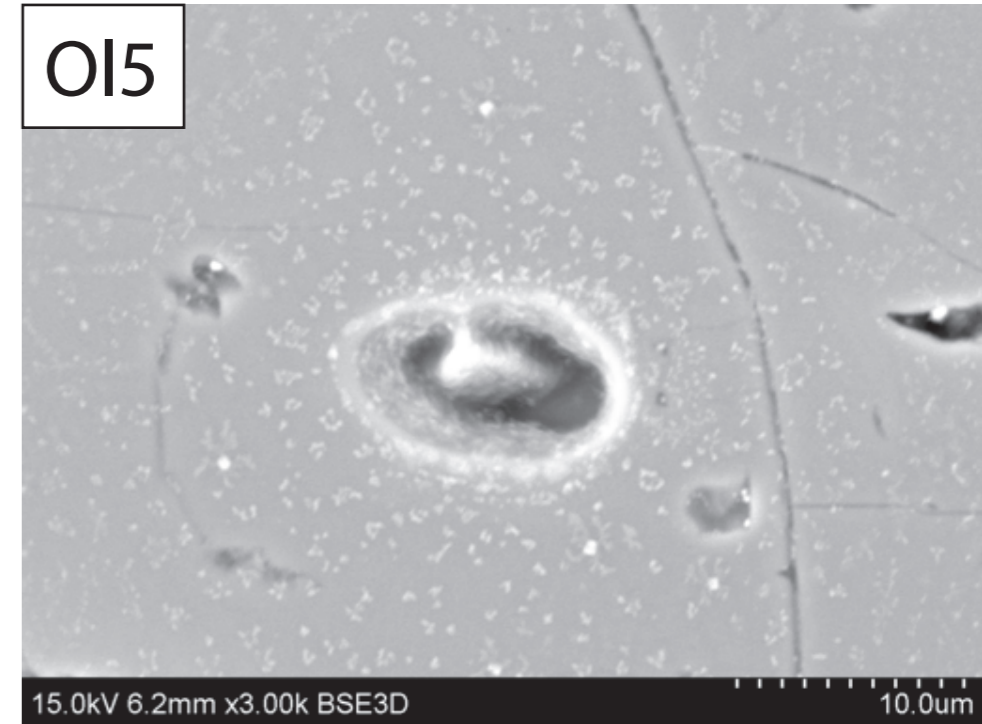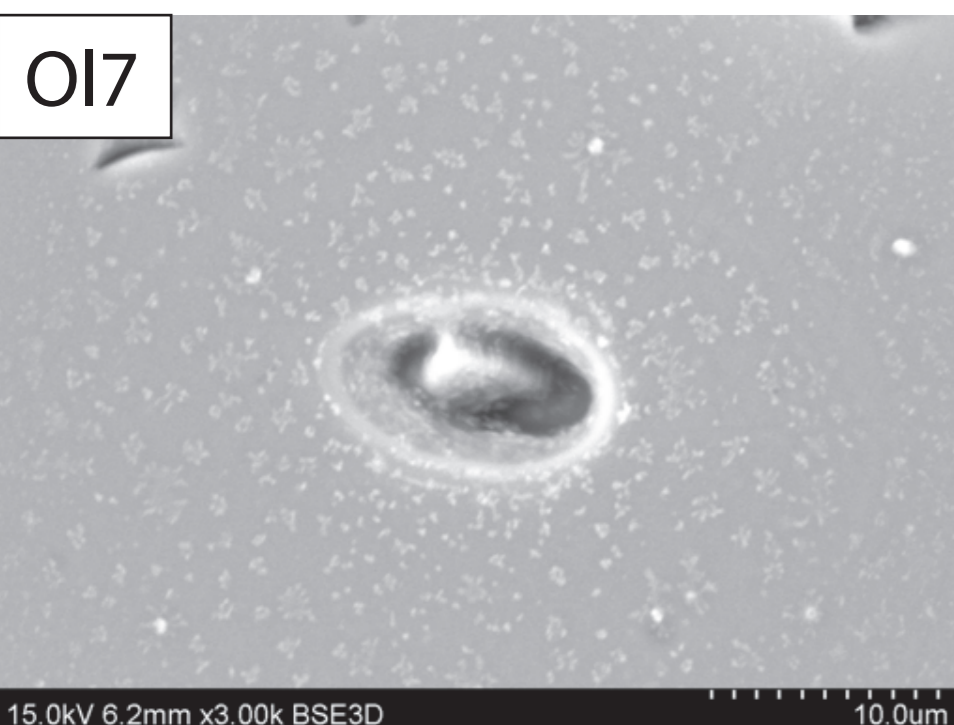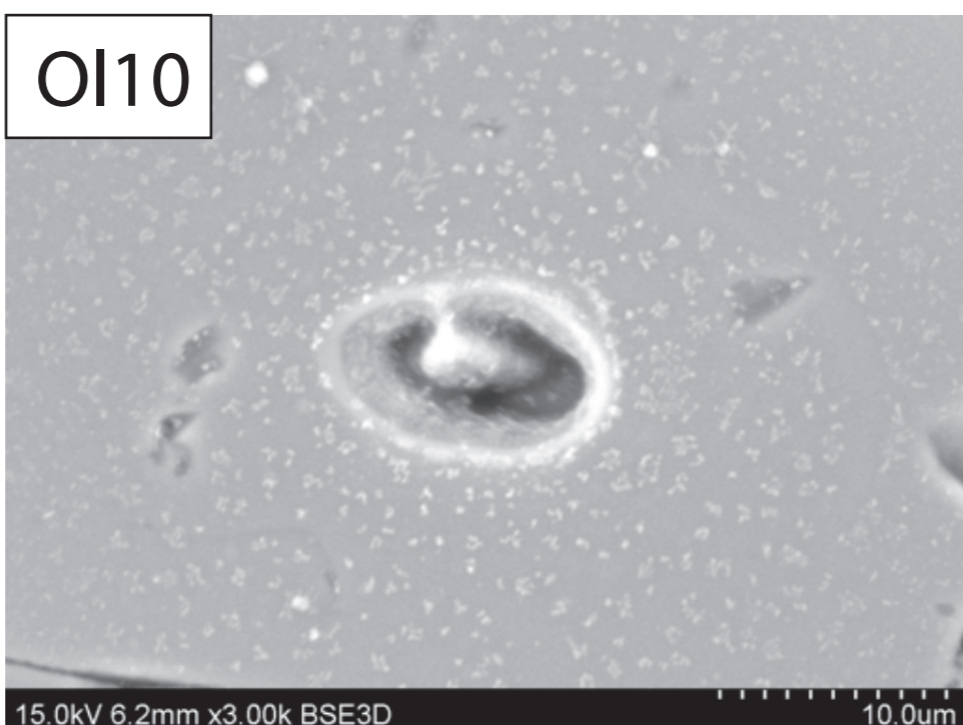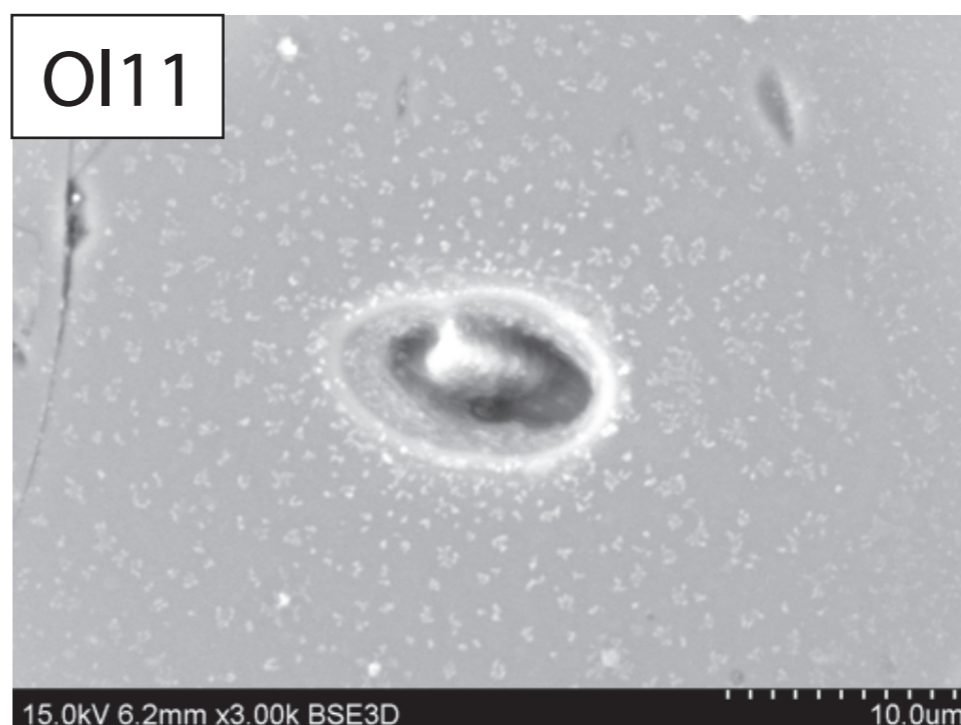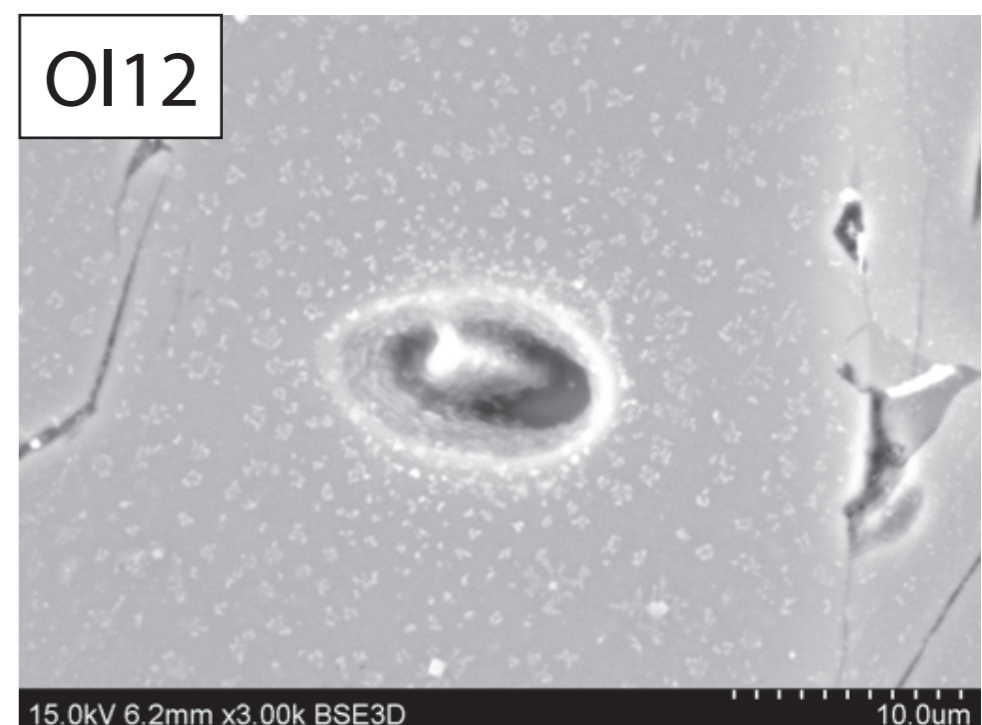

Ol-Px Al-Mg spots:

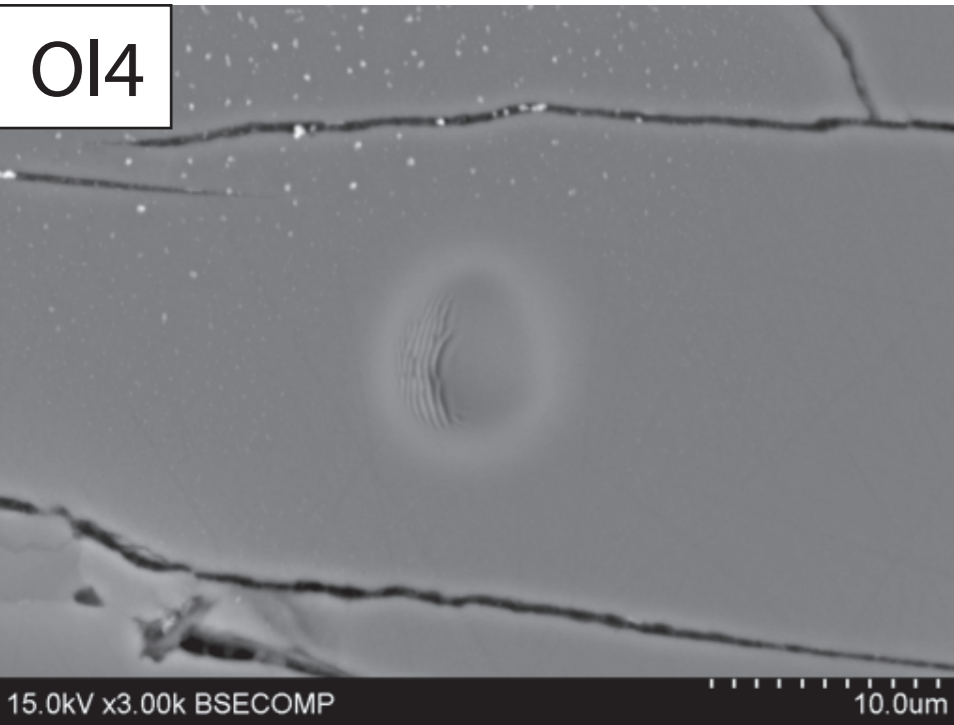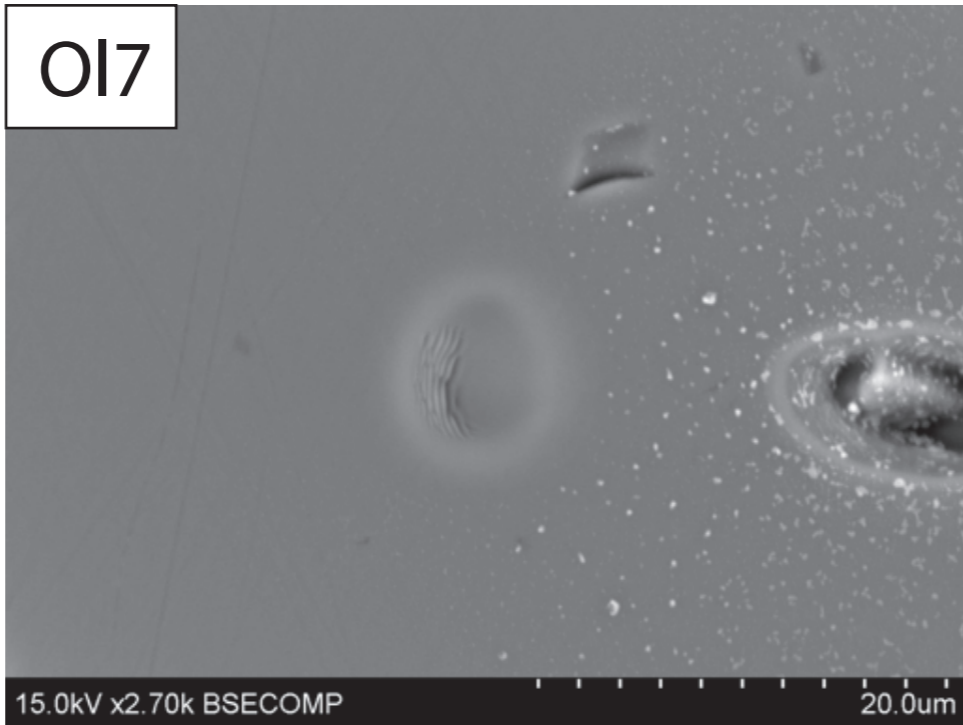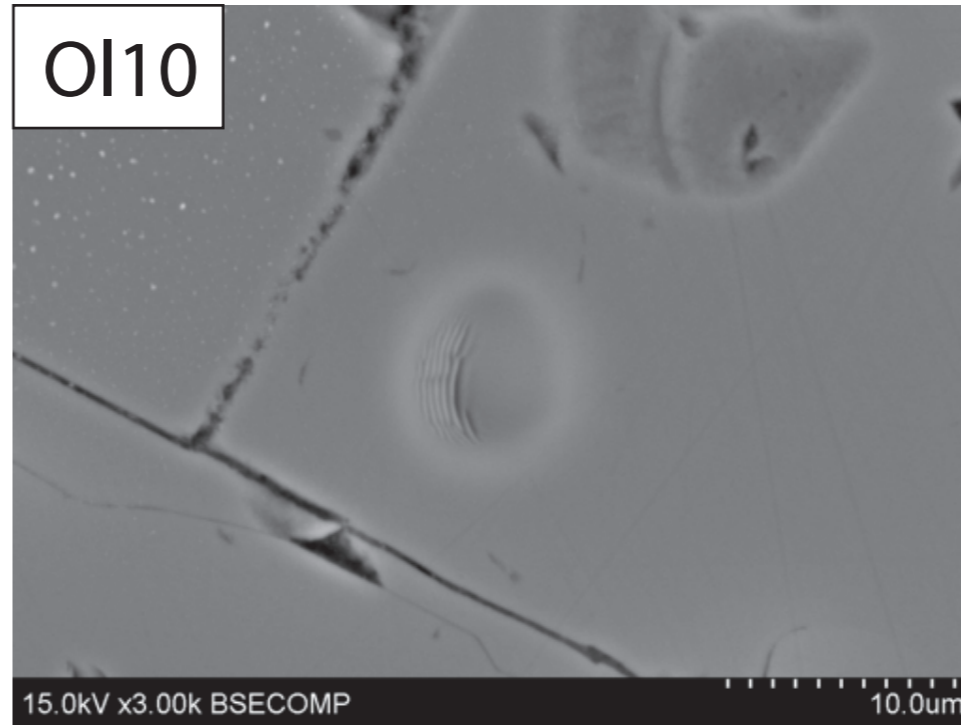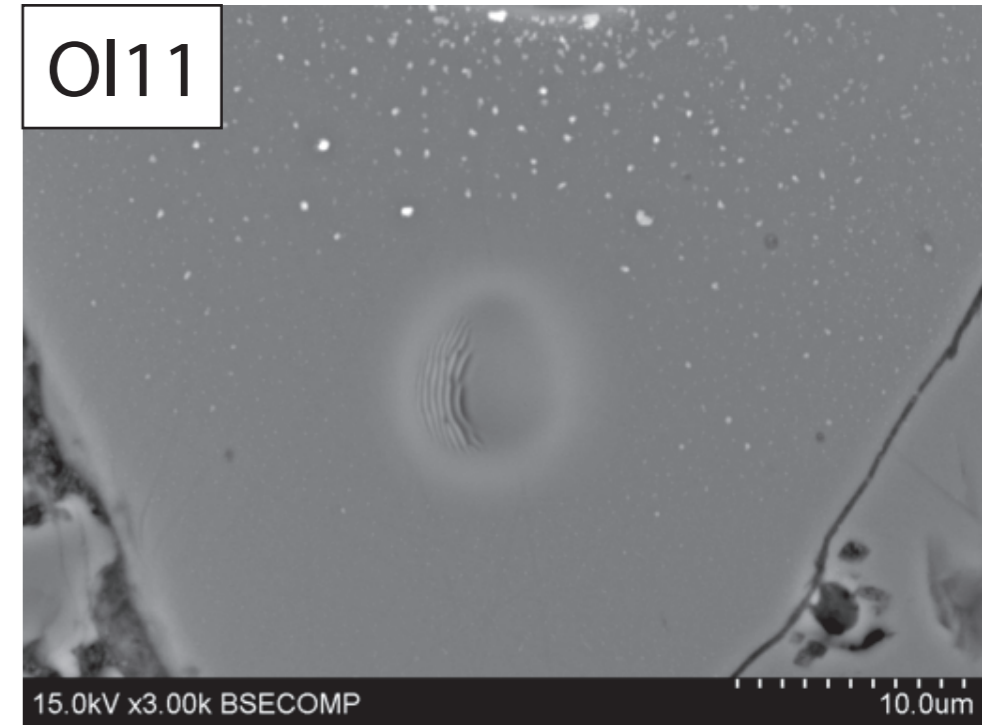

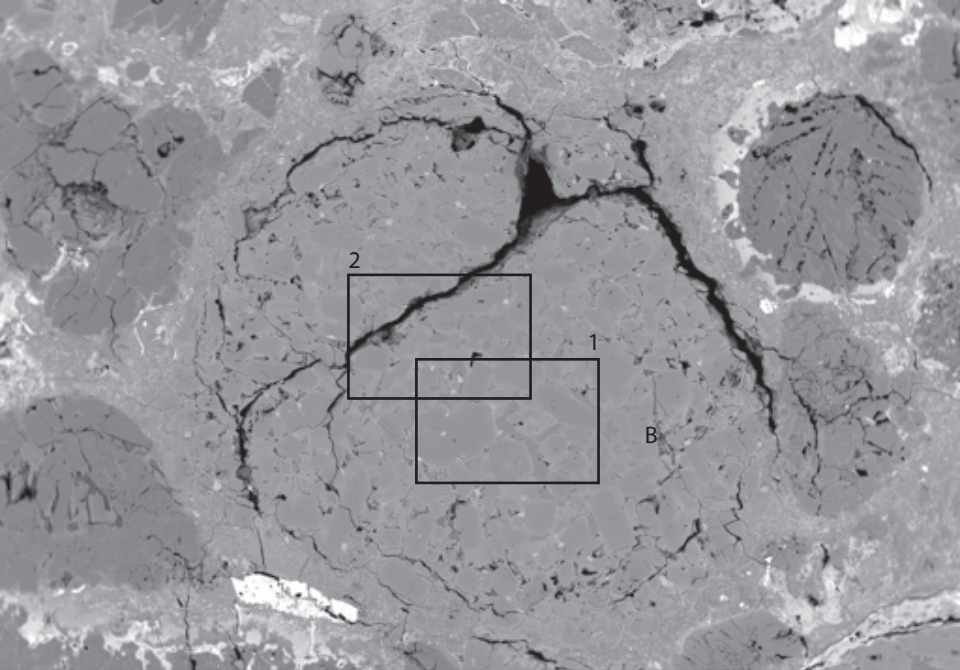



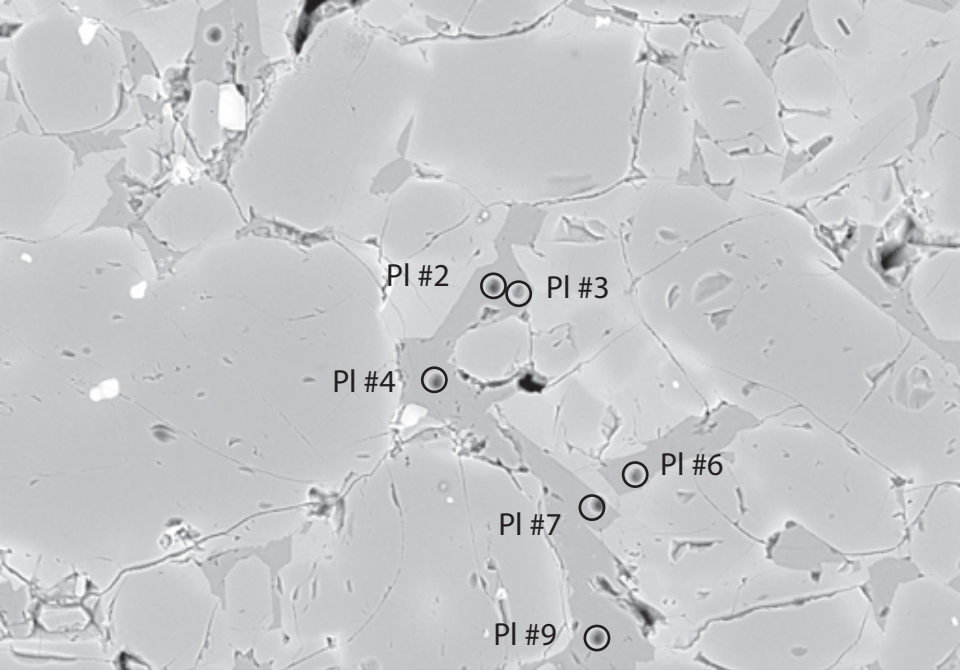

PI #2

PI #3

PI #4

PI #6

PI #7

PI #9

2

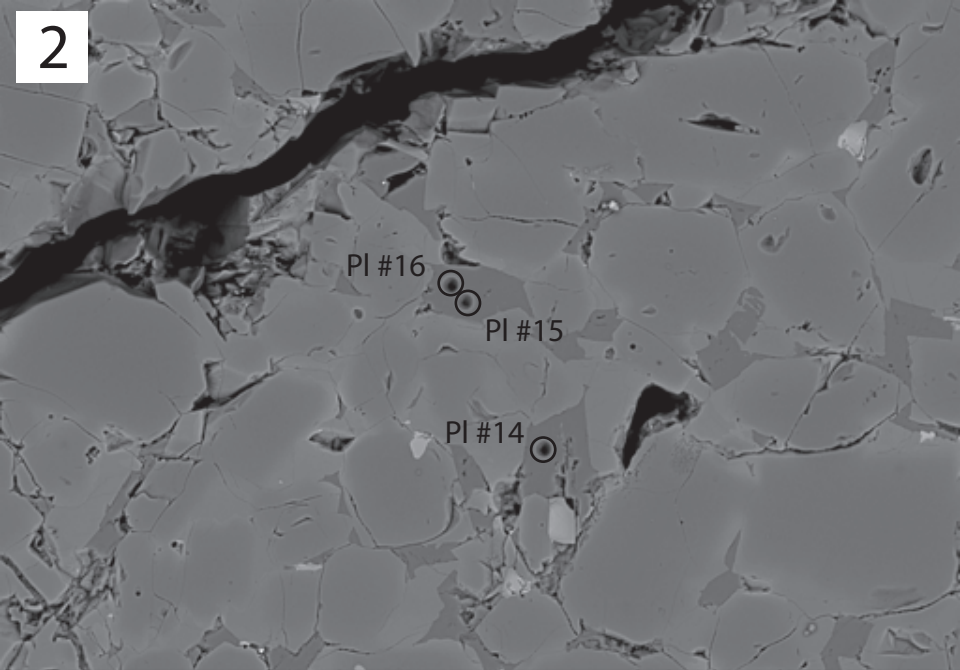

PI #16

PI #15

PI #14

# An Al-Mg spots:

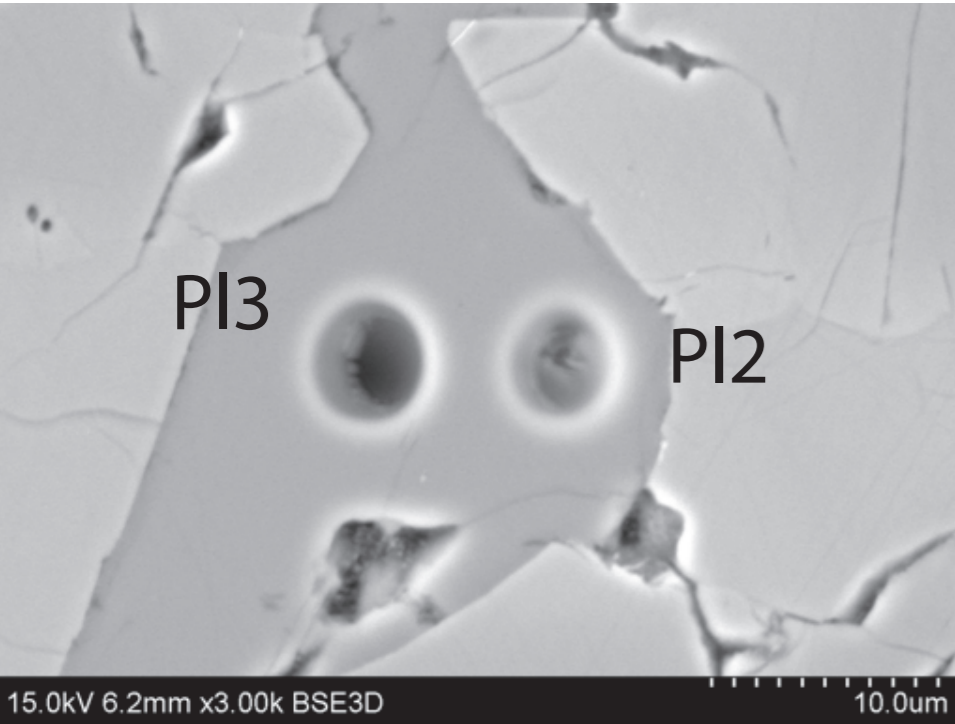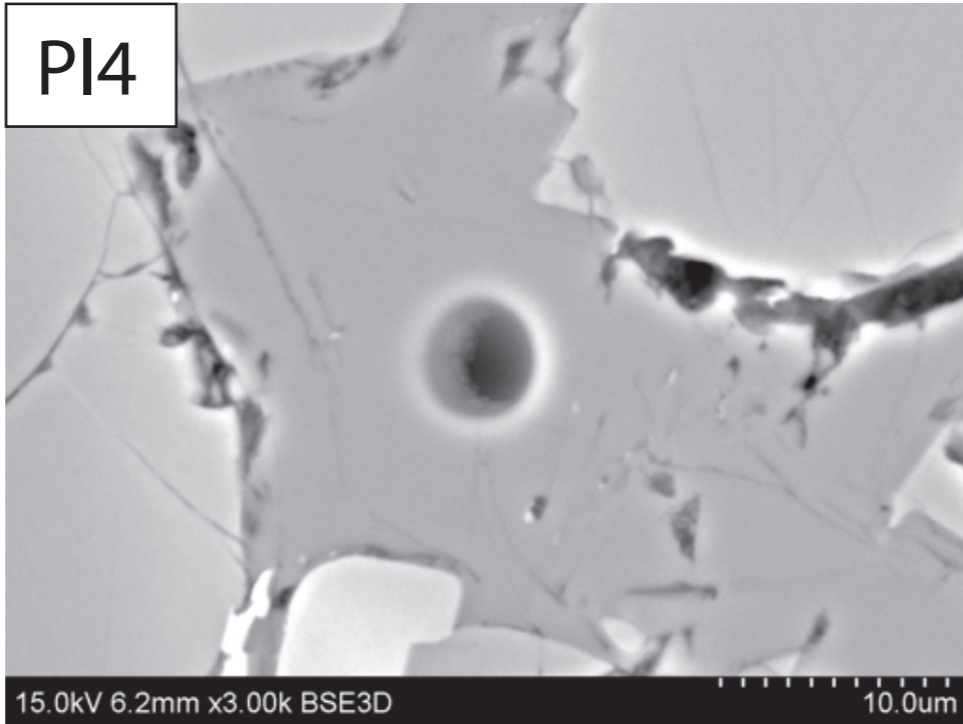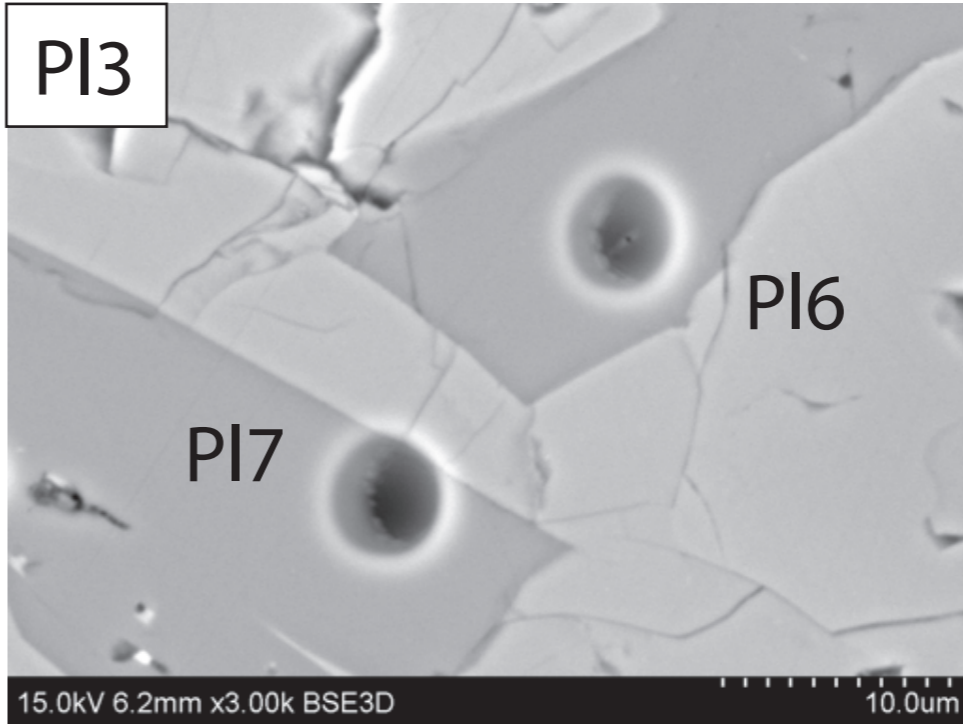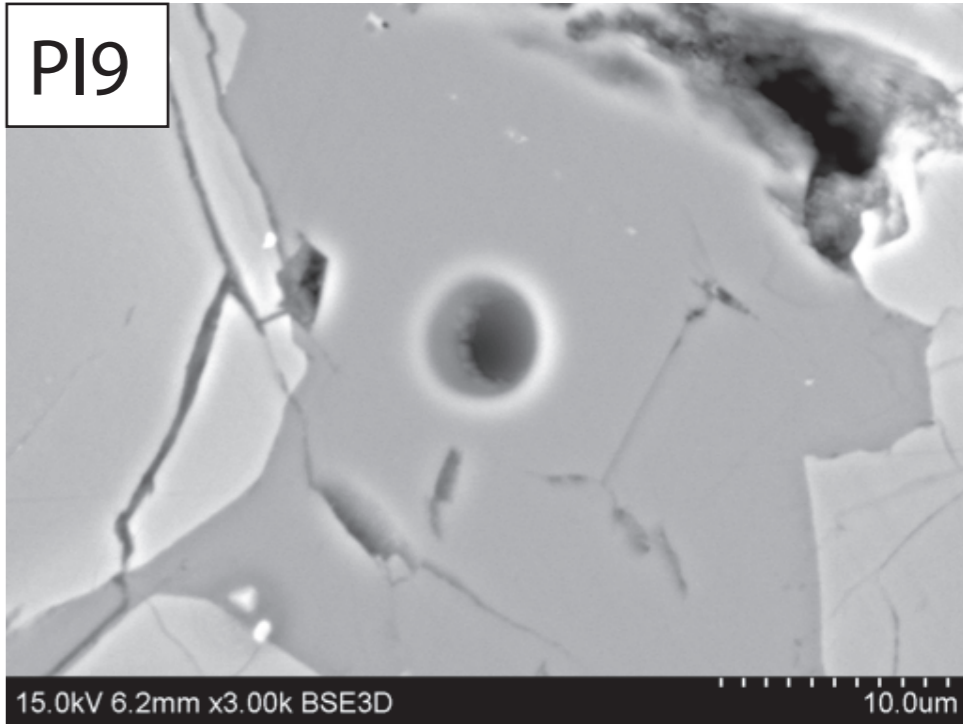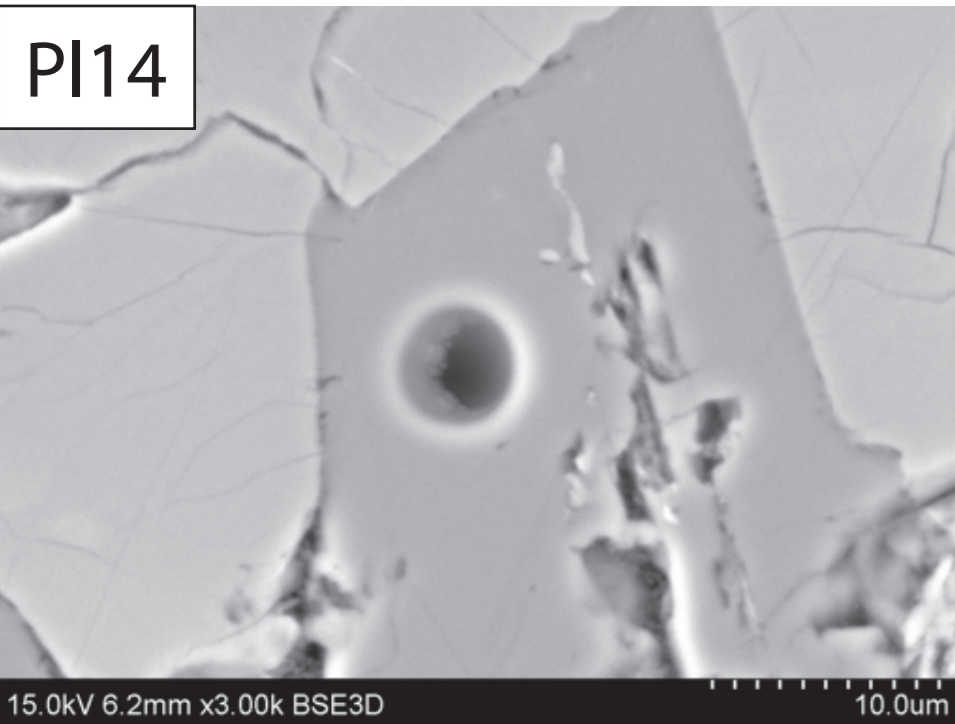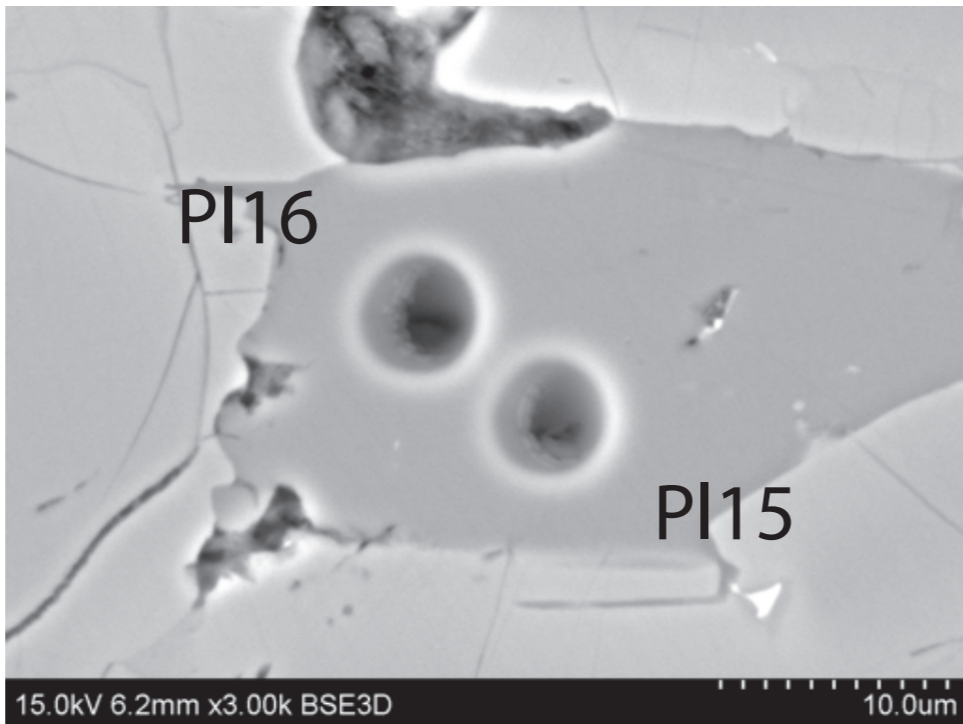

Supplement: NIHMS1757327-supplement-EA6-13.pdf [file NIHMS1757327-supplement-EA6-13.pdf]
