# Supplementary material
Source: PubMed Central journal article supplement (PMC8740609)

Electronic Annex EA 6-14: Location of SIMS analyses for NWA 8276 c88  
New constraints from  $^{26}\text{Al}$ - $^{26}\text{Mg}$  chronology of anorthite  
bearing chondrules in unequilibrated ordinary chondrites  
*Guillaume Siron, Kohei Fukuda, Makoto Kimura, and Noriko T. Kita*

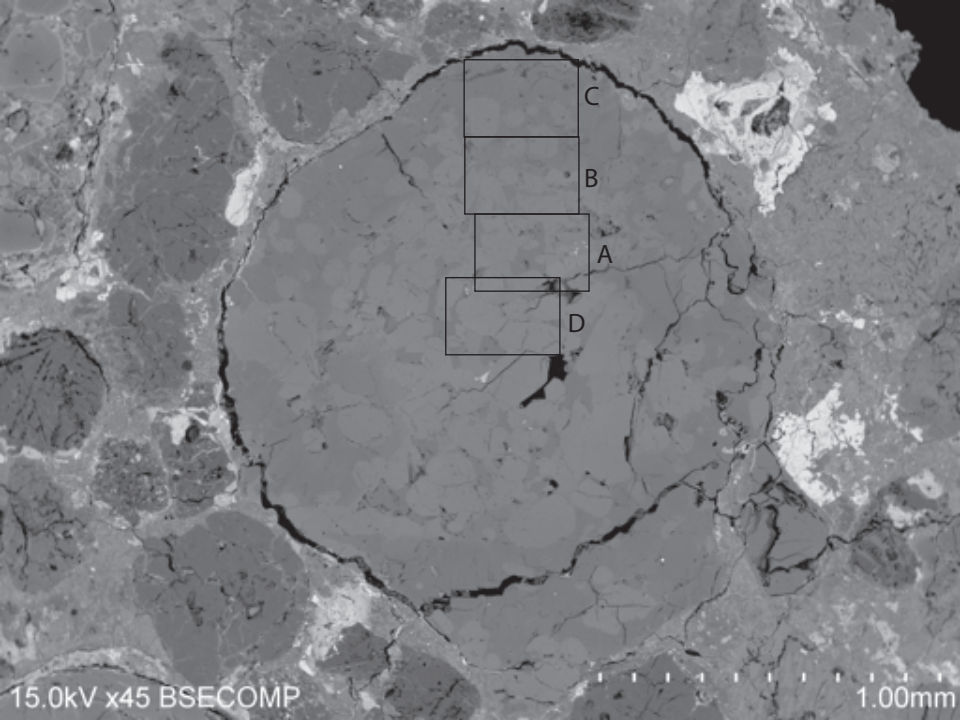

C

B

A

D

15.0kV x45 BSECOMP

1.00mm

A

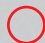

Ol #1b

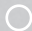

An #1

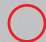

**B**

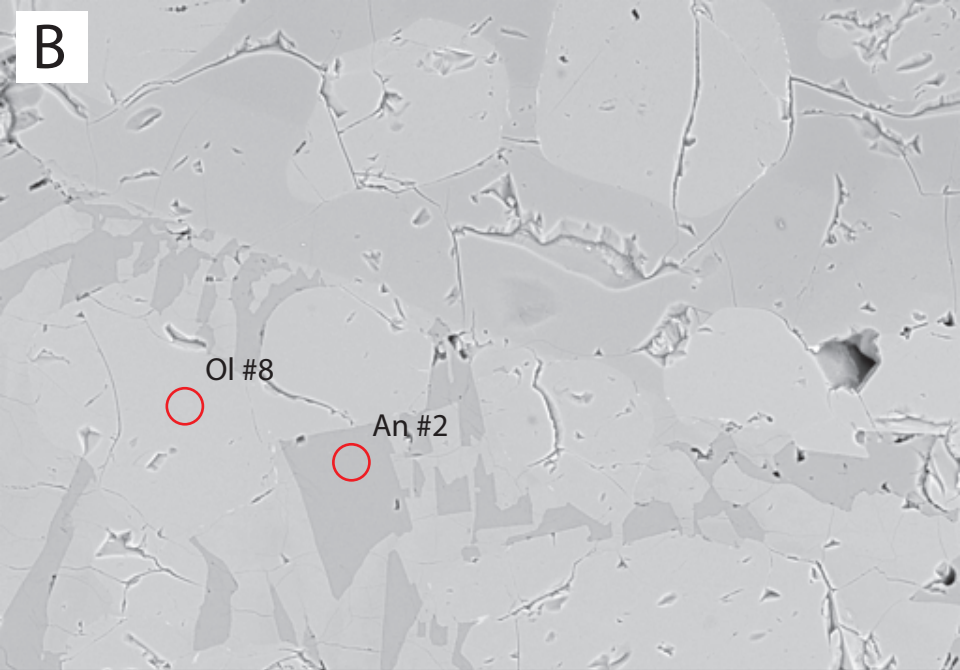

Ol #8

An #2

C

Px #20

OI #9

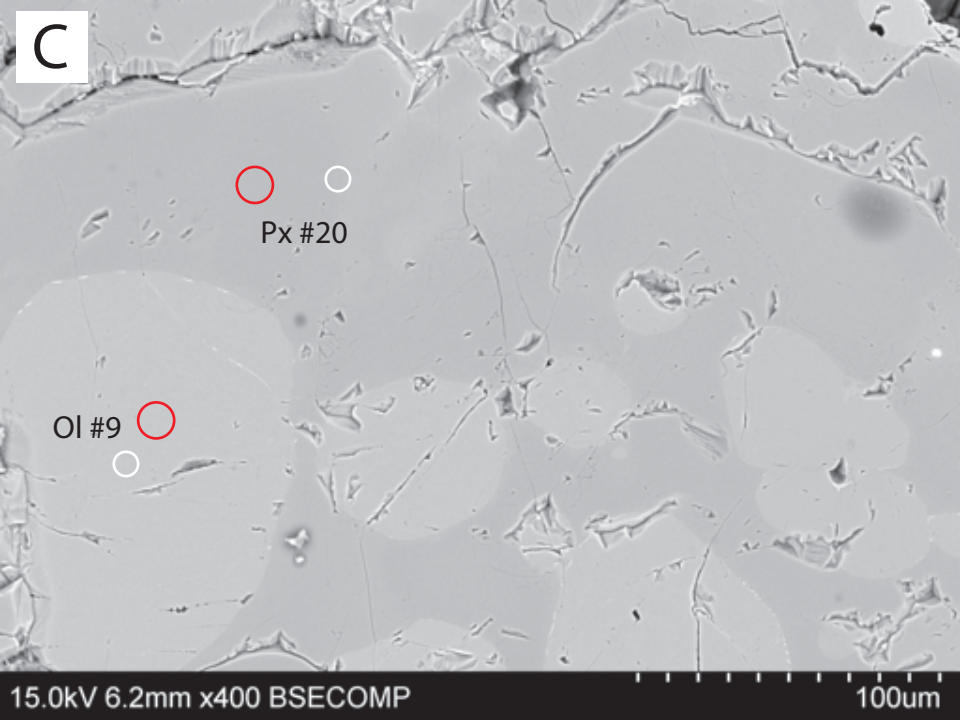

D

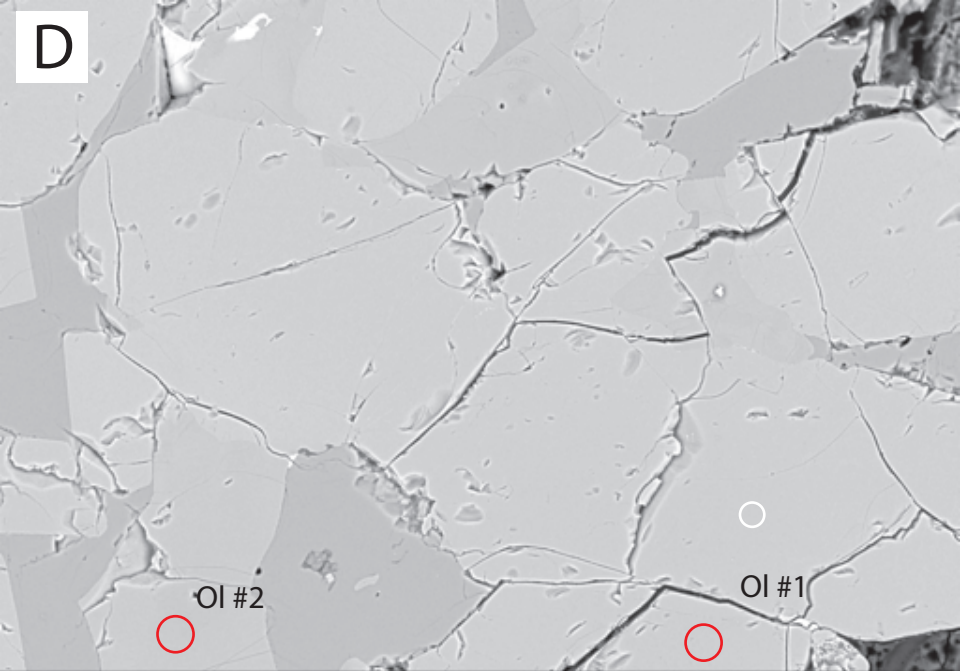

Ol #2

Ol #1

15.0kV 6.2mm x400 BSECOMP

100um

# Ol-Px oxygen spots:

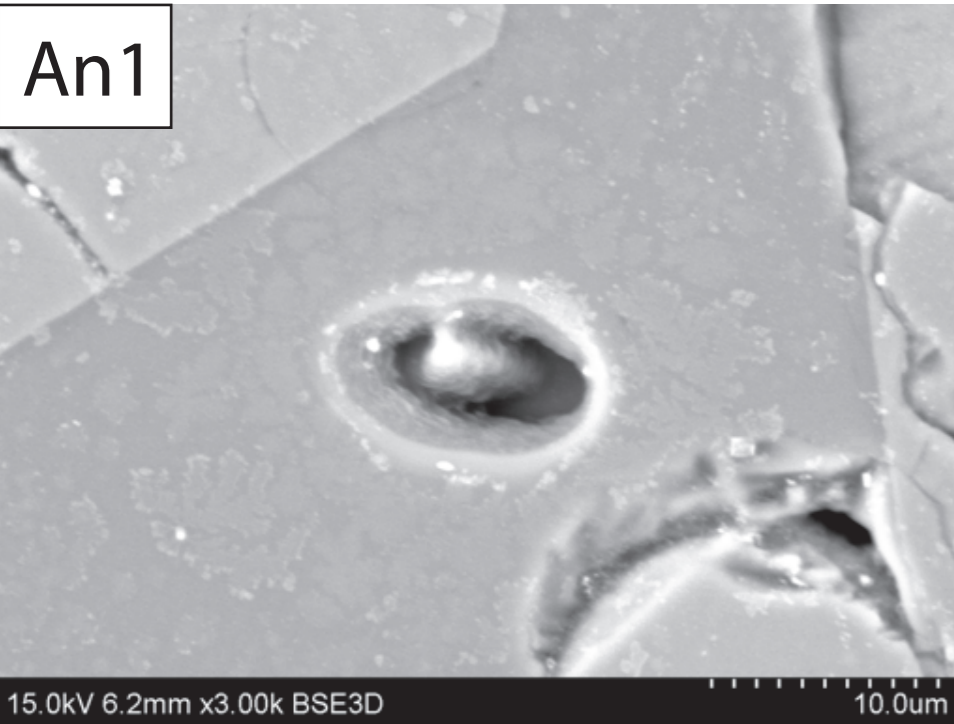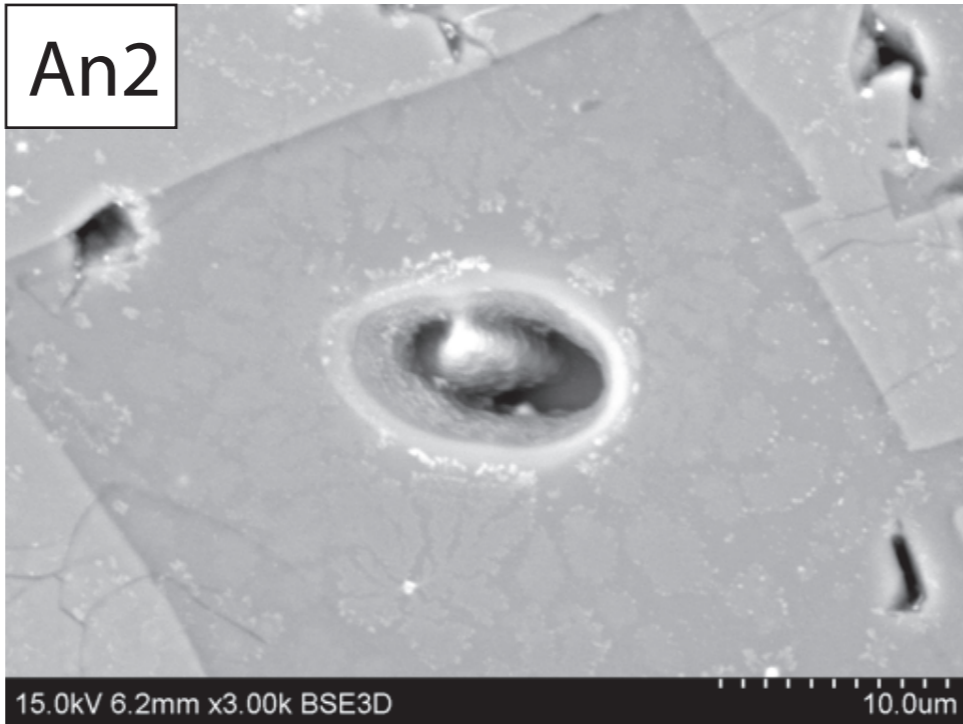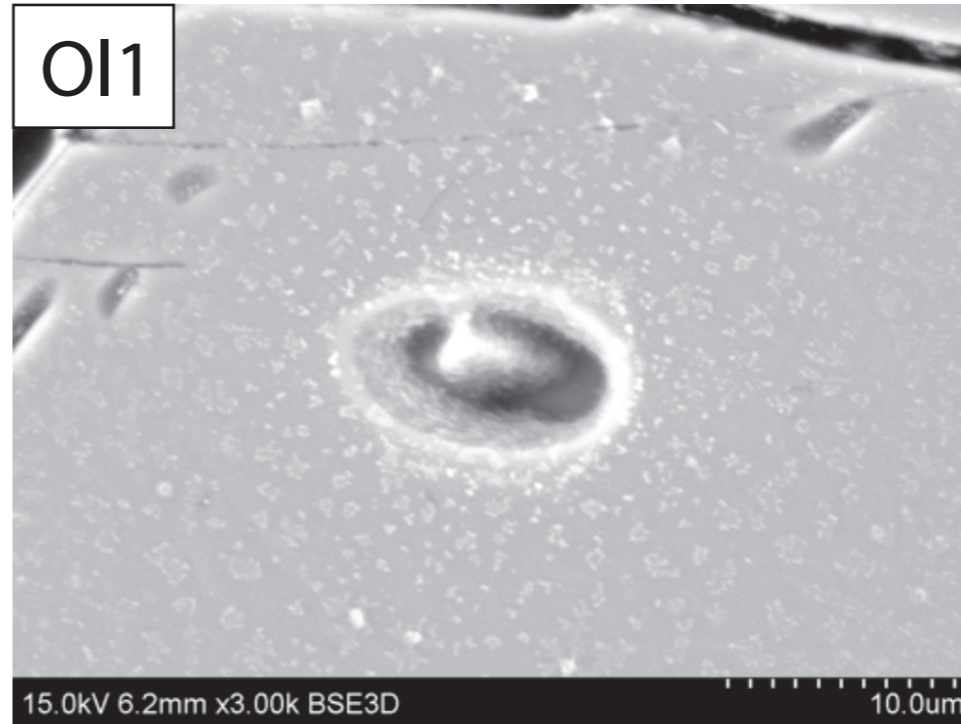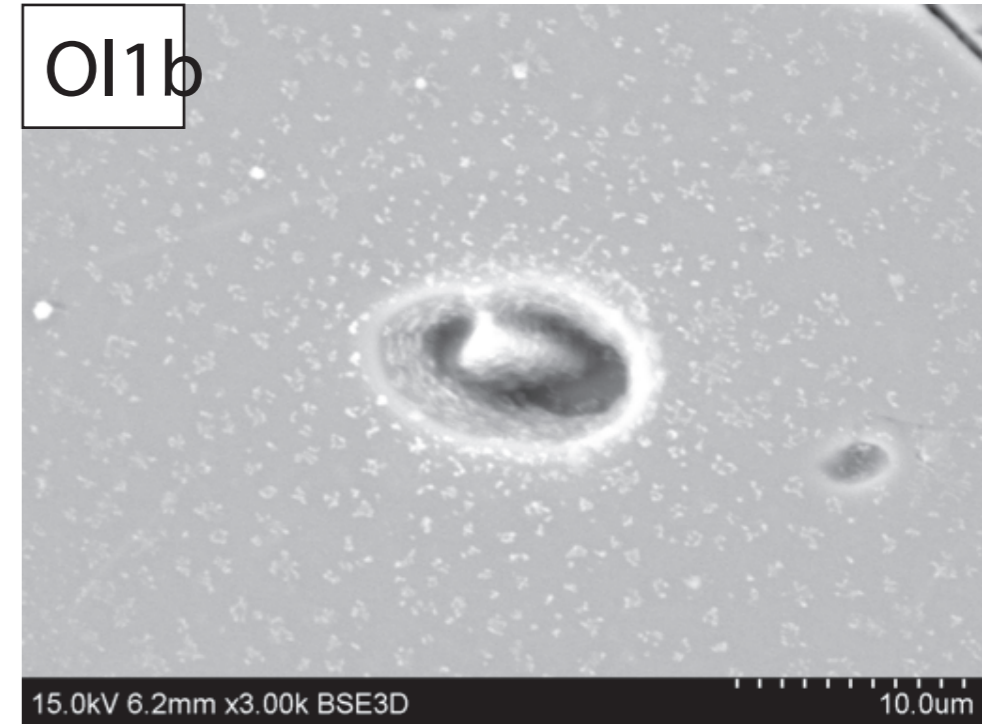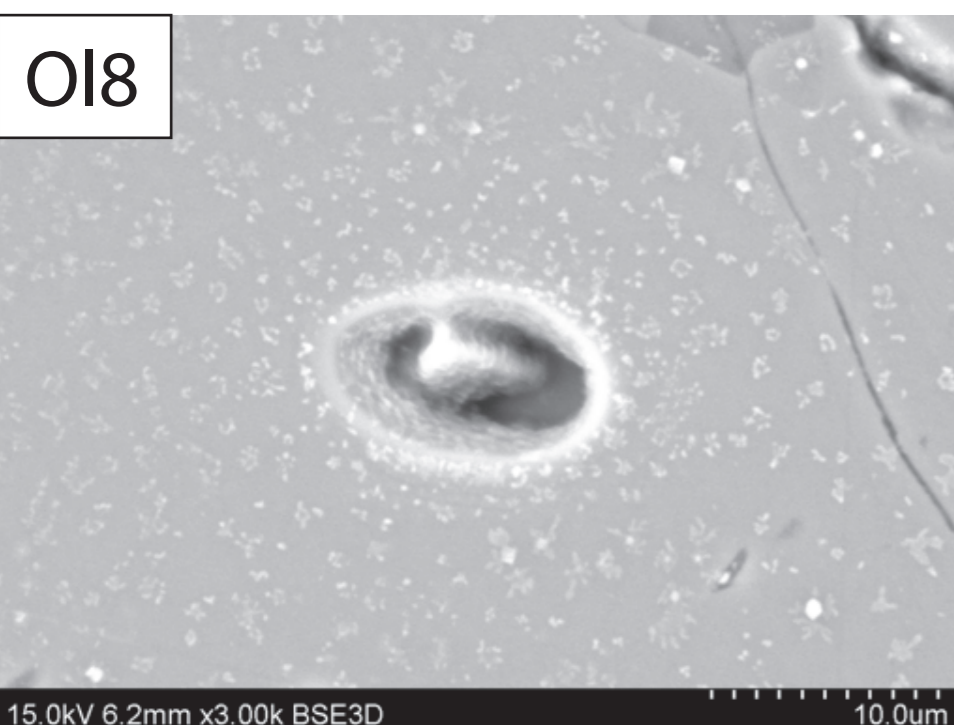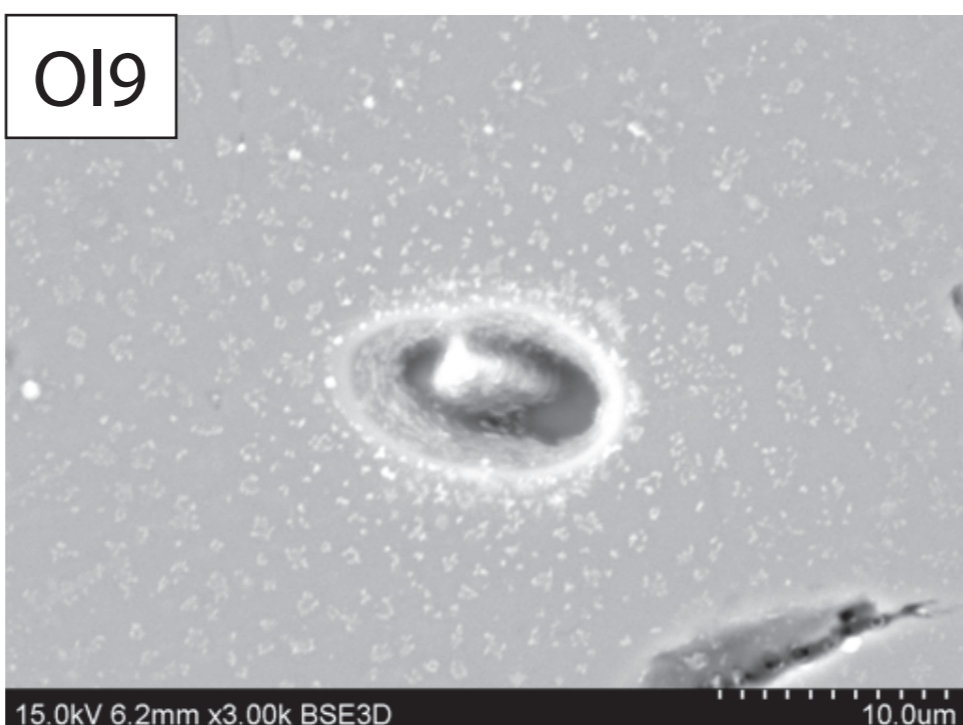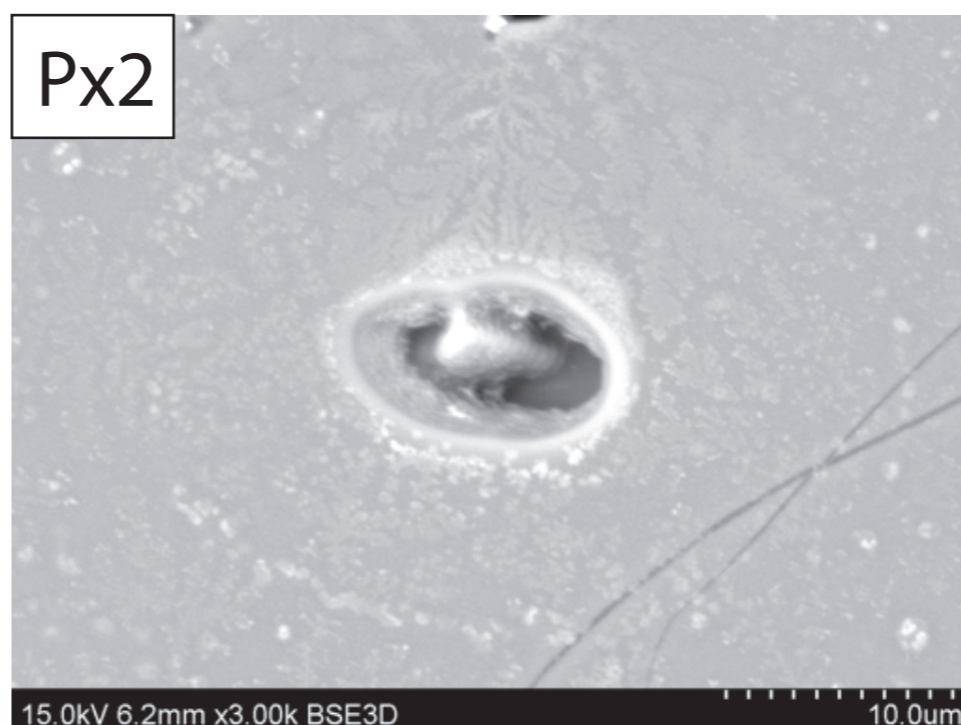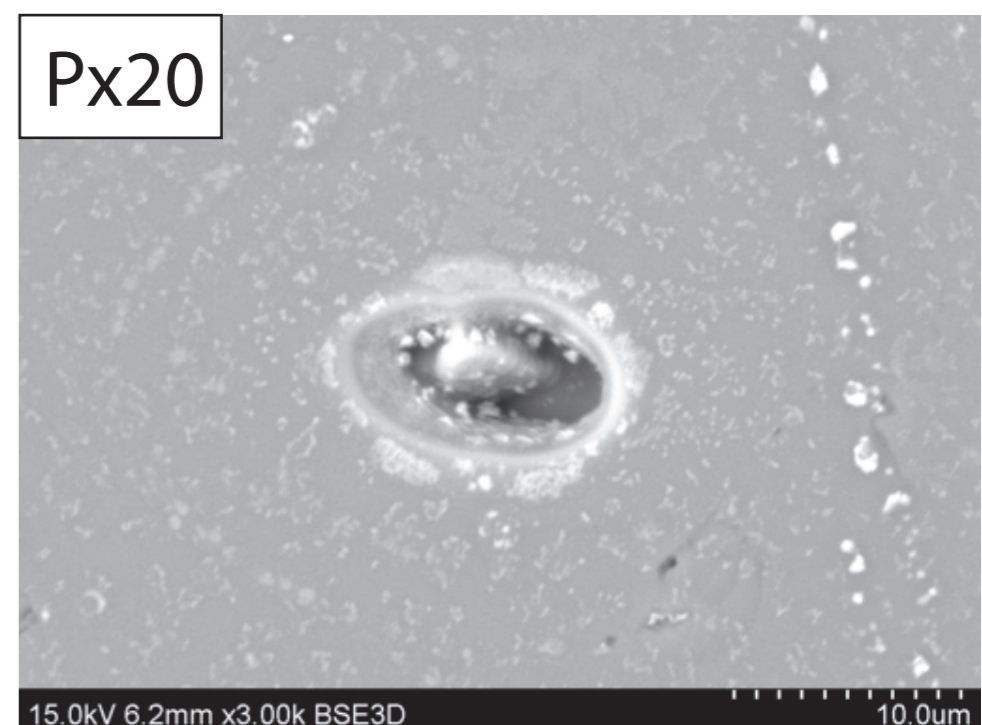

# Ol-Px Al-Mg spots:

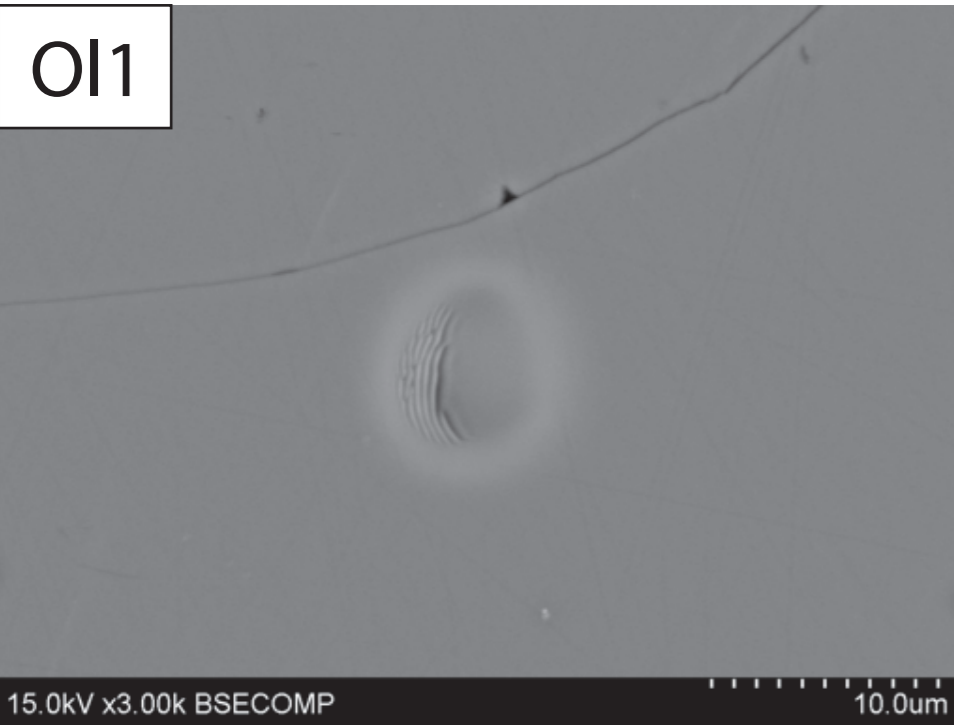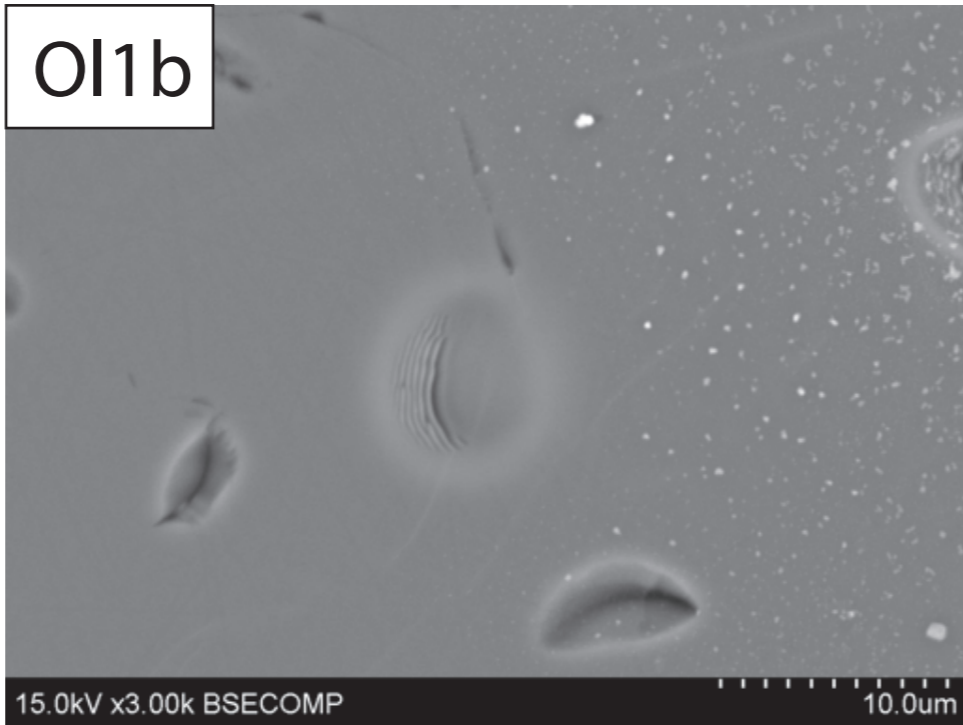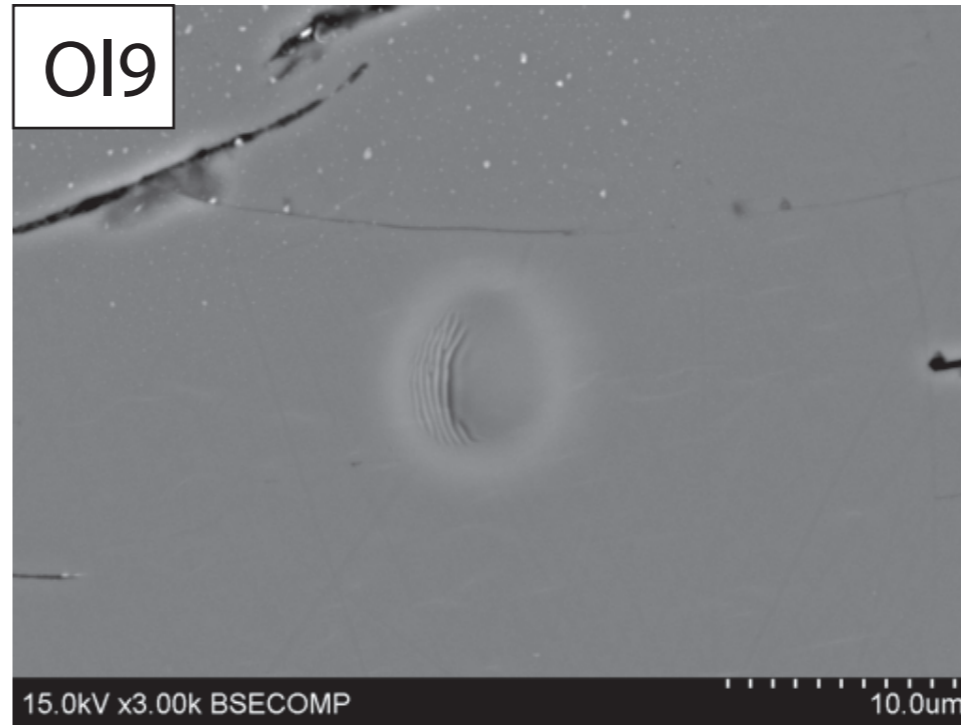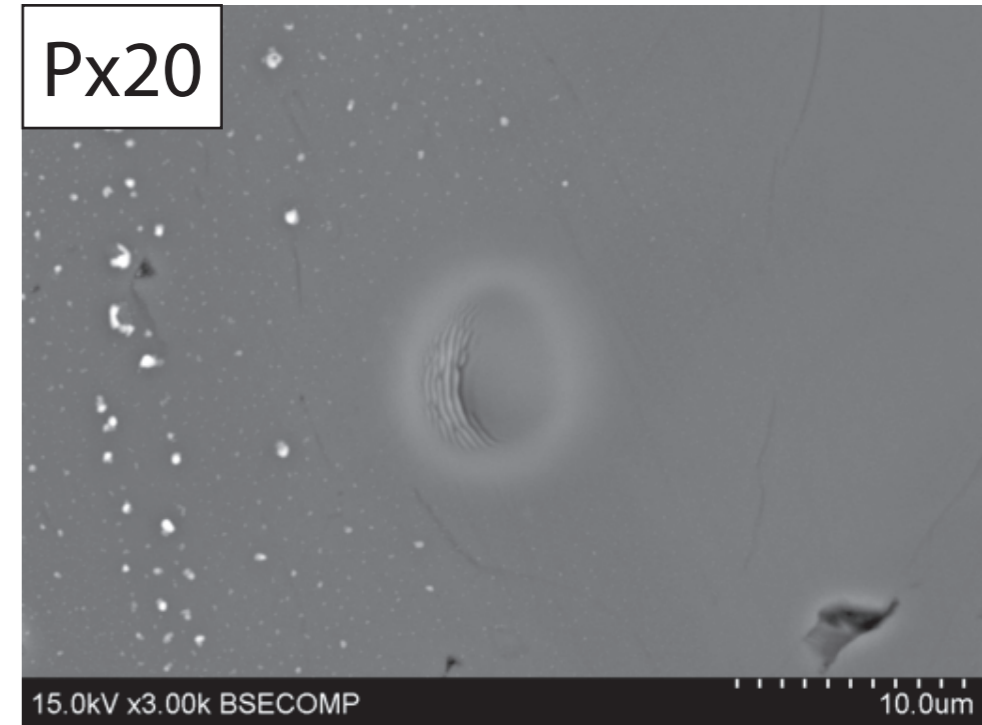

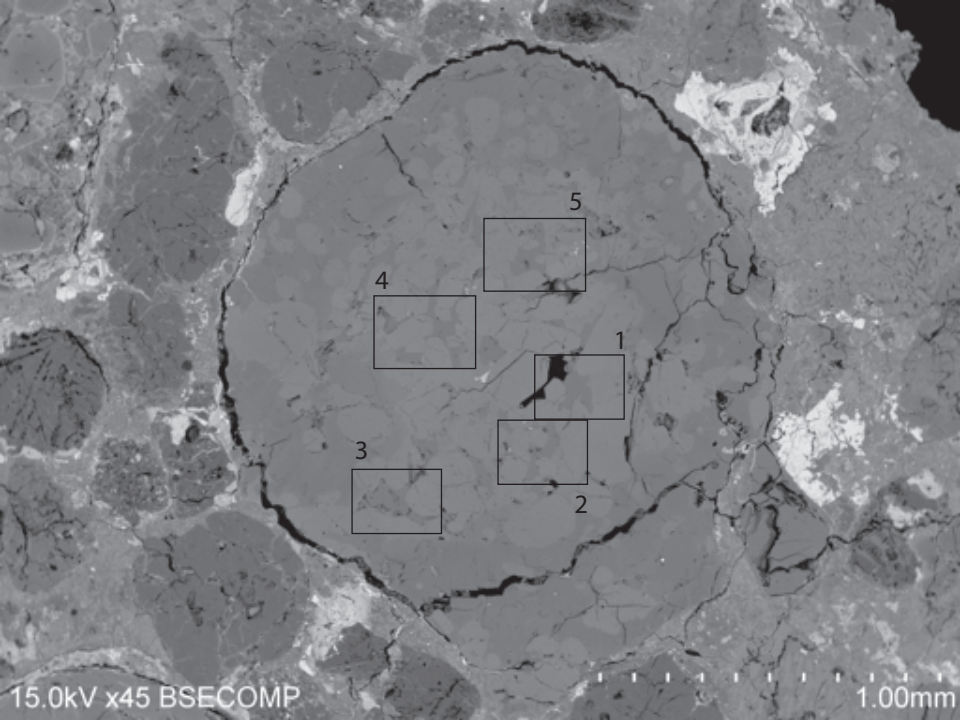

15.0kV x45 BSECOMP

1.00mm



1

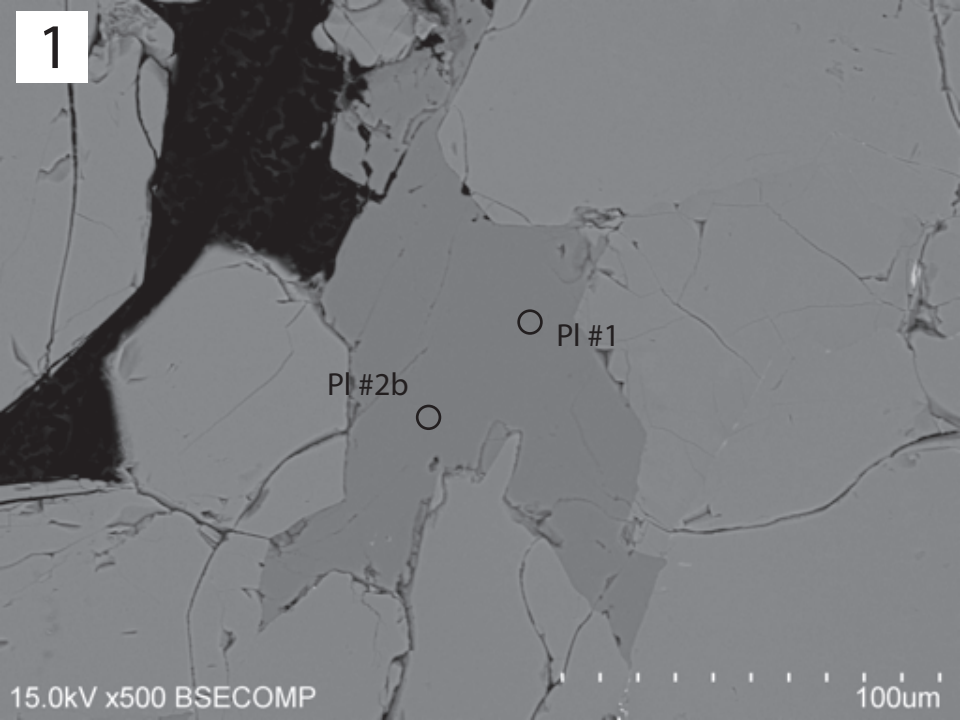

PI #2b

PI #1

15.0kV x500 BSECOMP

100um

2

PI #3

PI #4

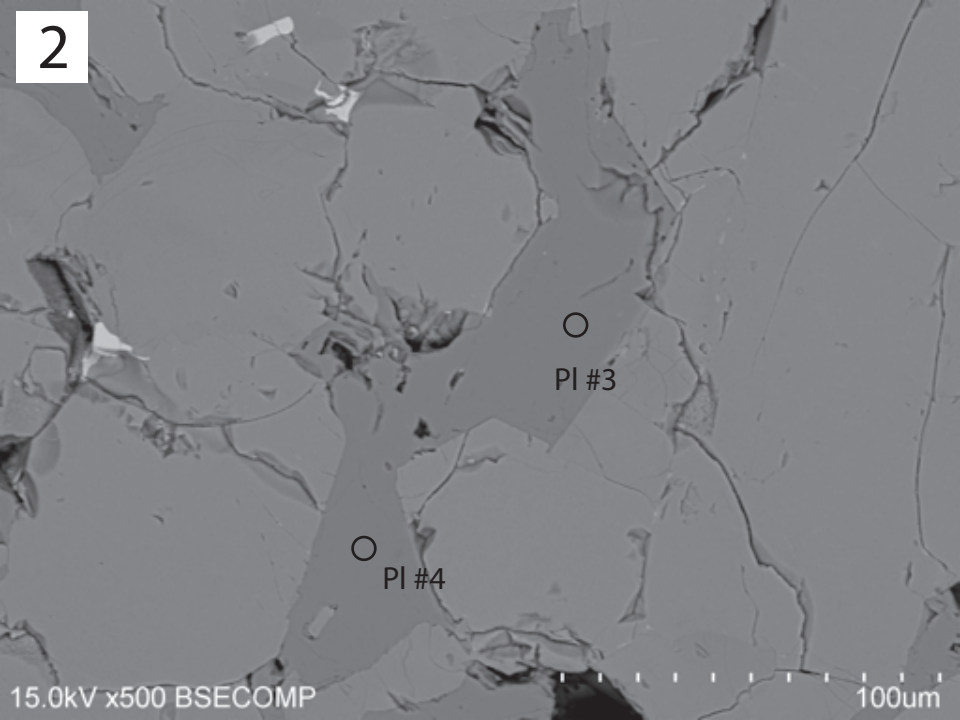

3

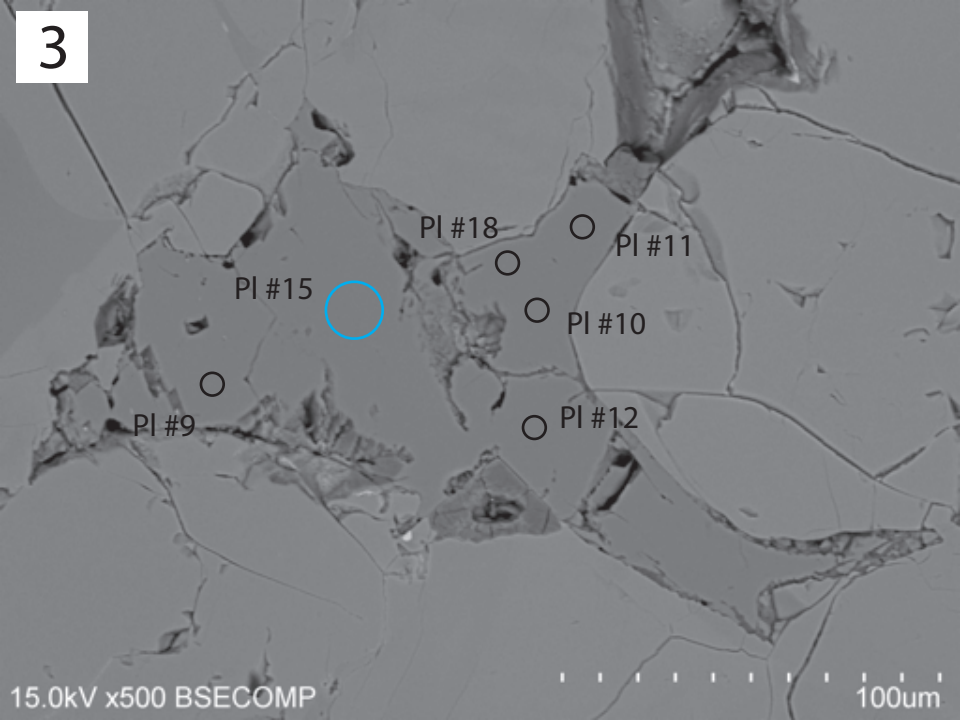

PI #15

PI #18

PI #11

PI #10

PI #9

PI #12

4

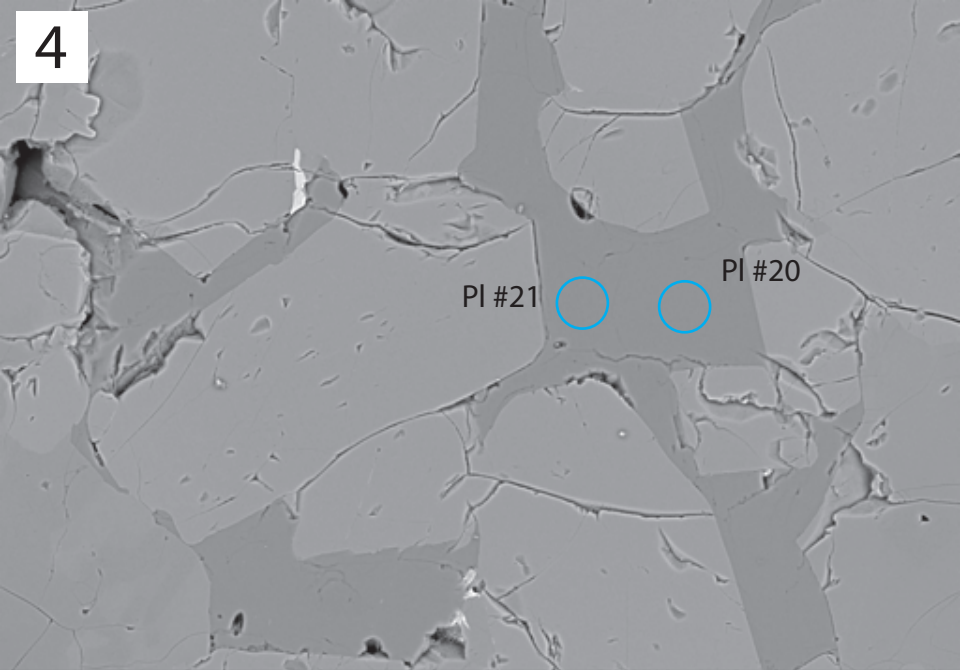

PI #21

PI #20

5

PI #23

PI #25

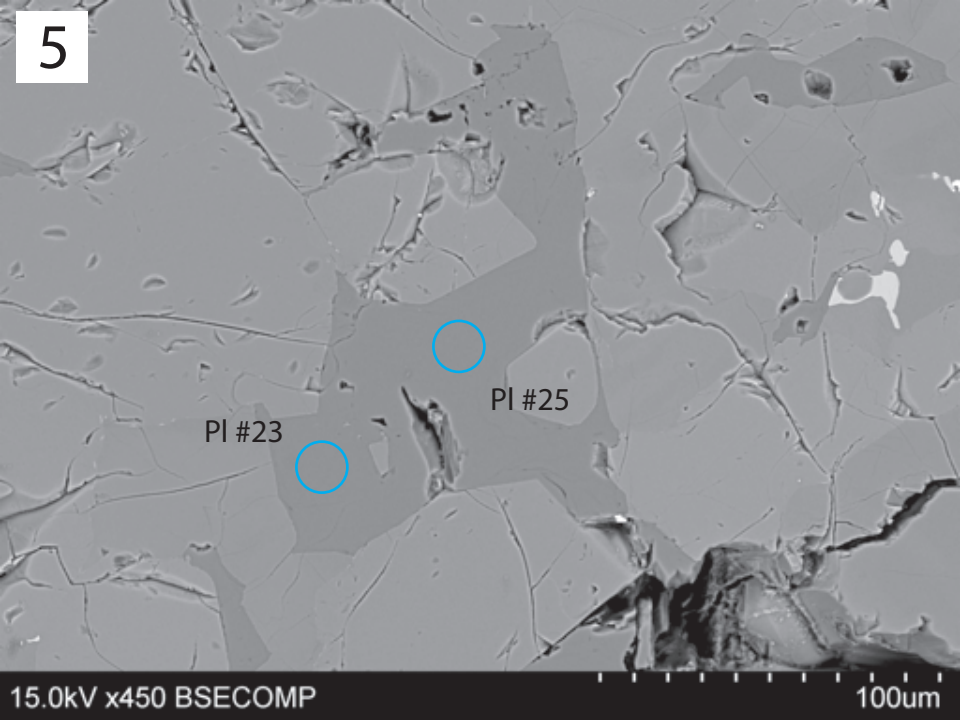

# Plagioclases Al-Mg spots:

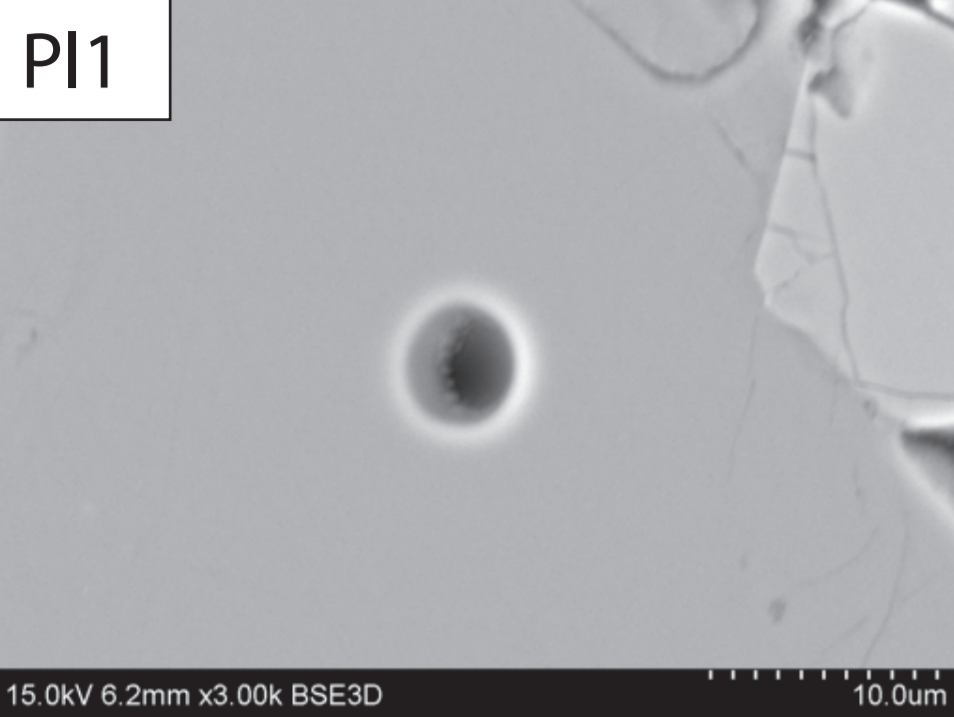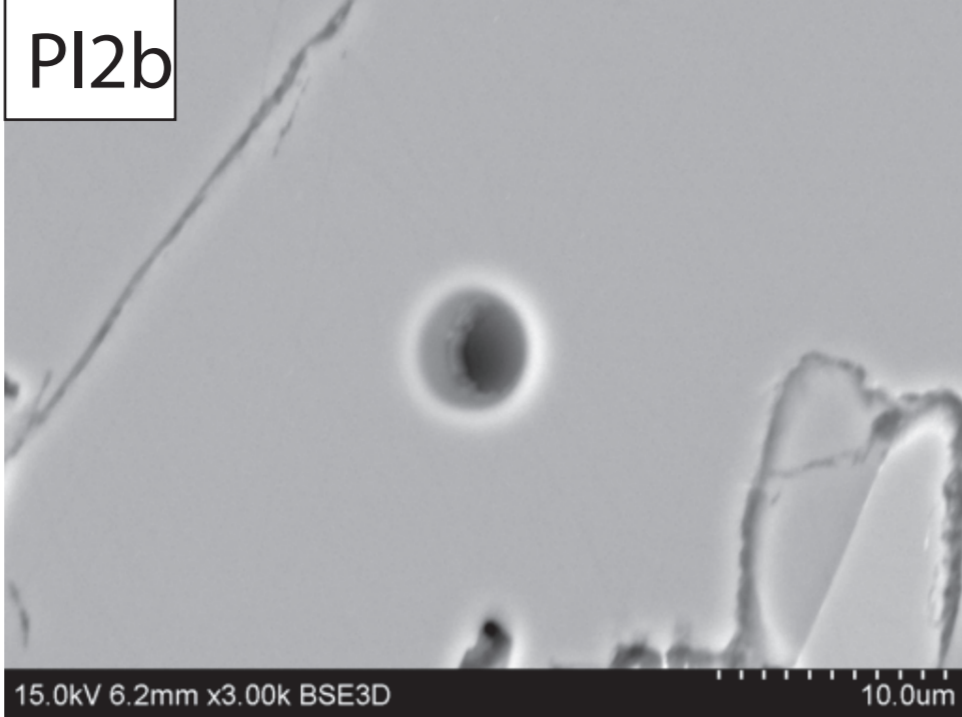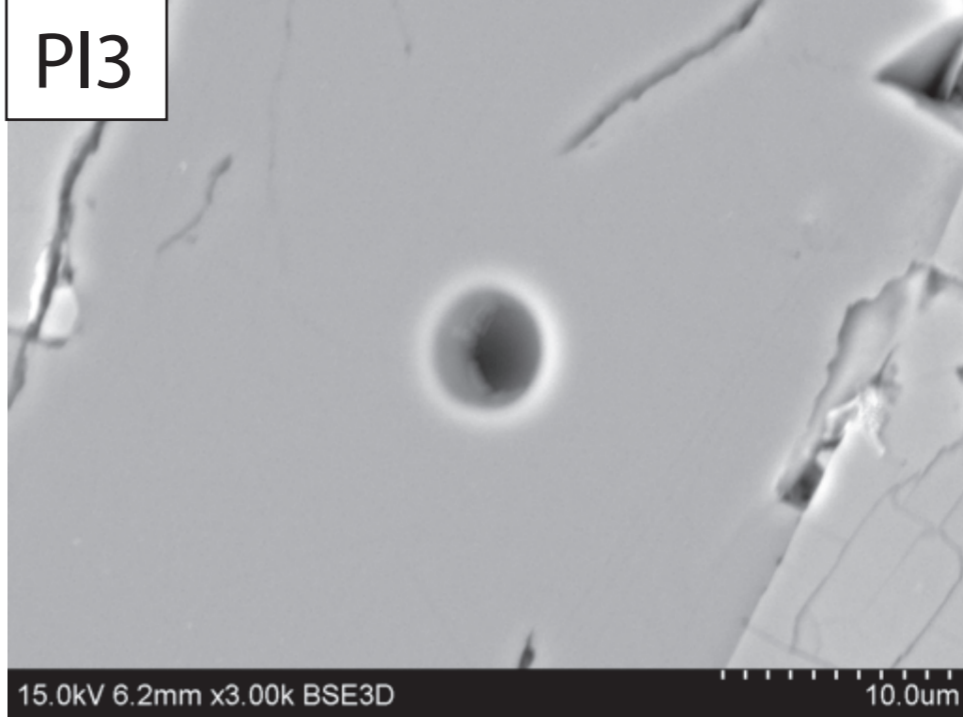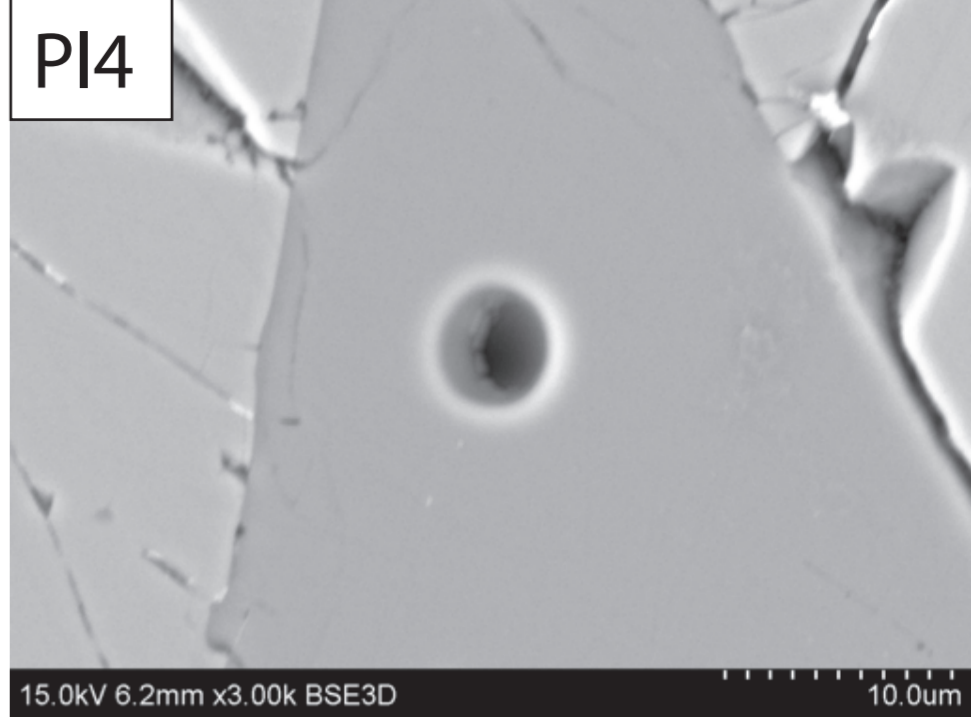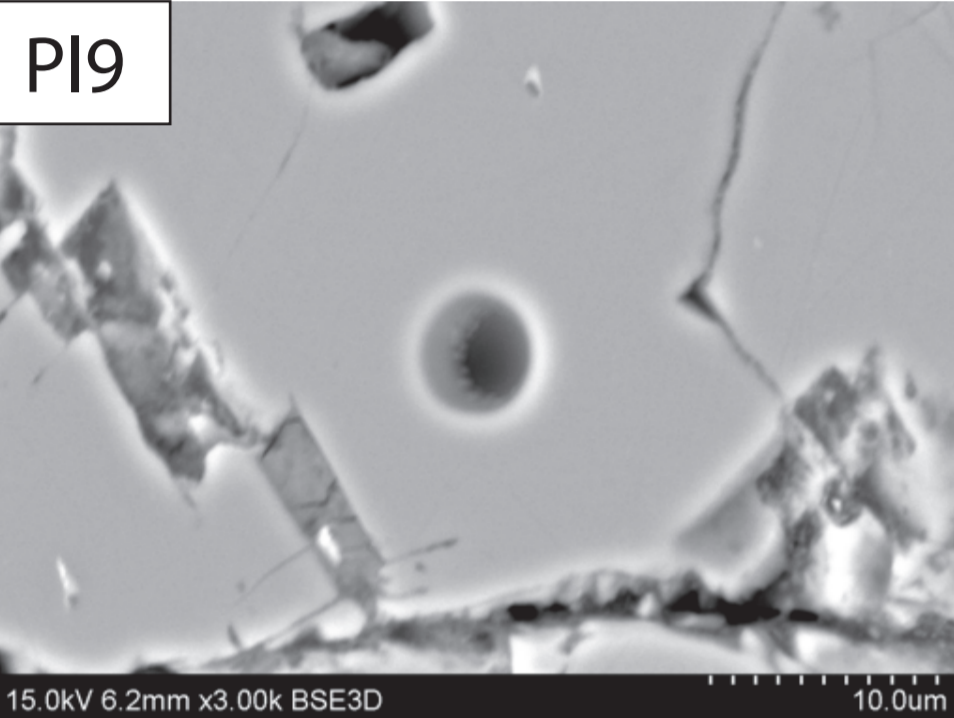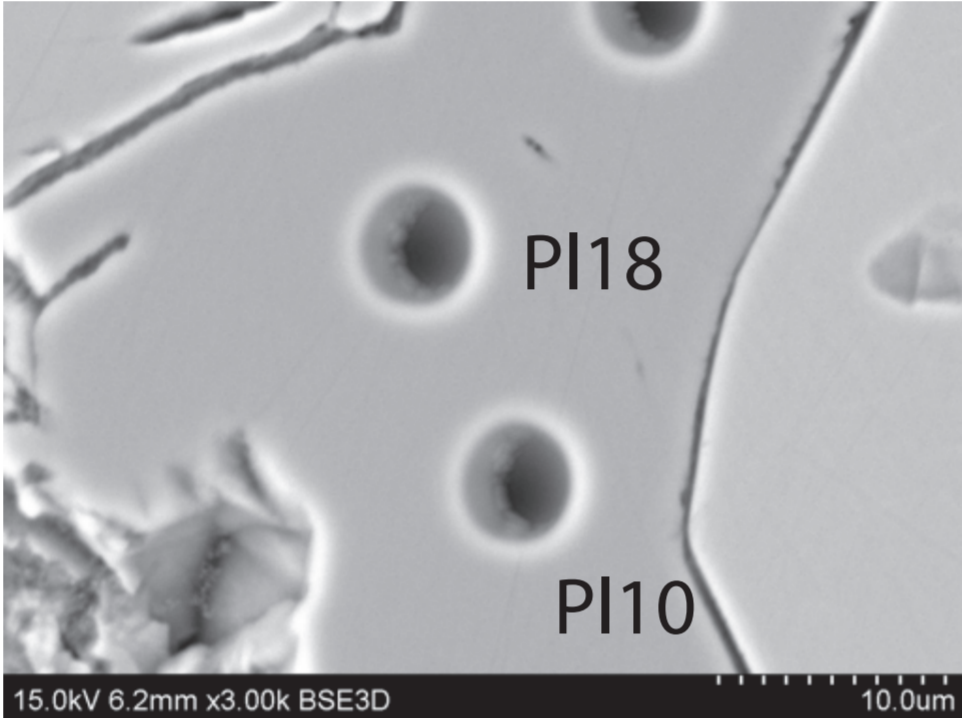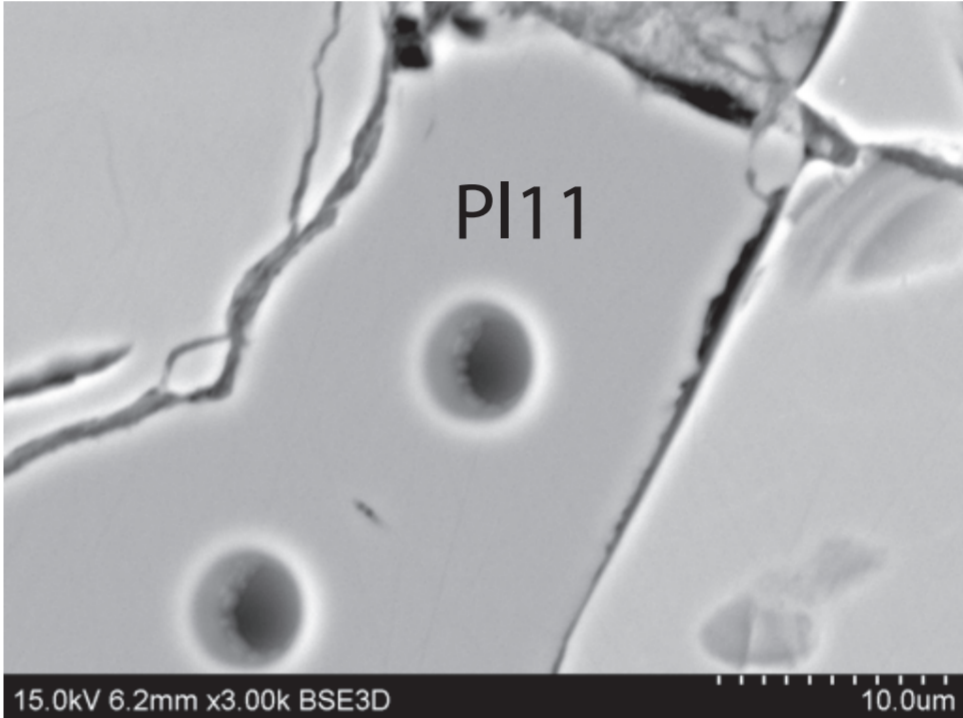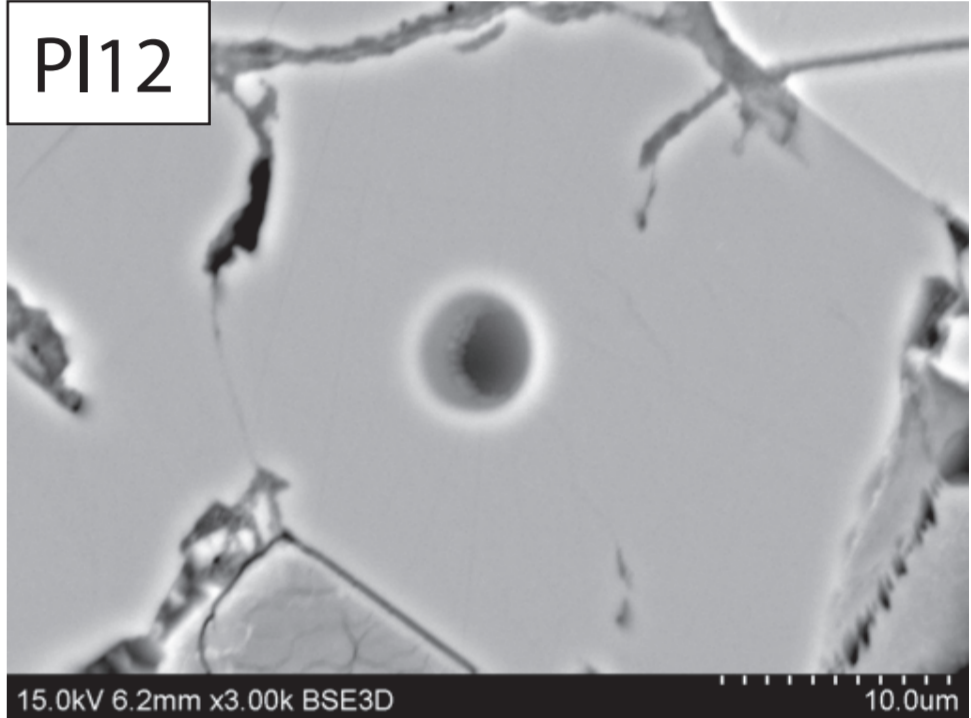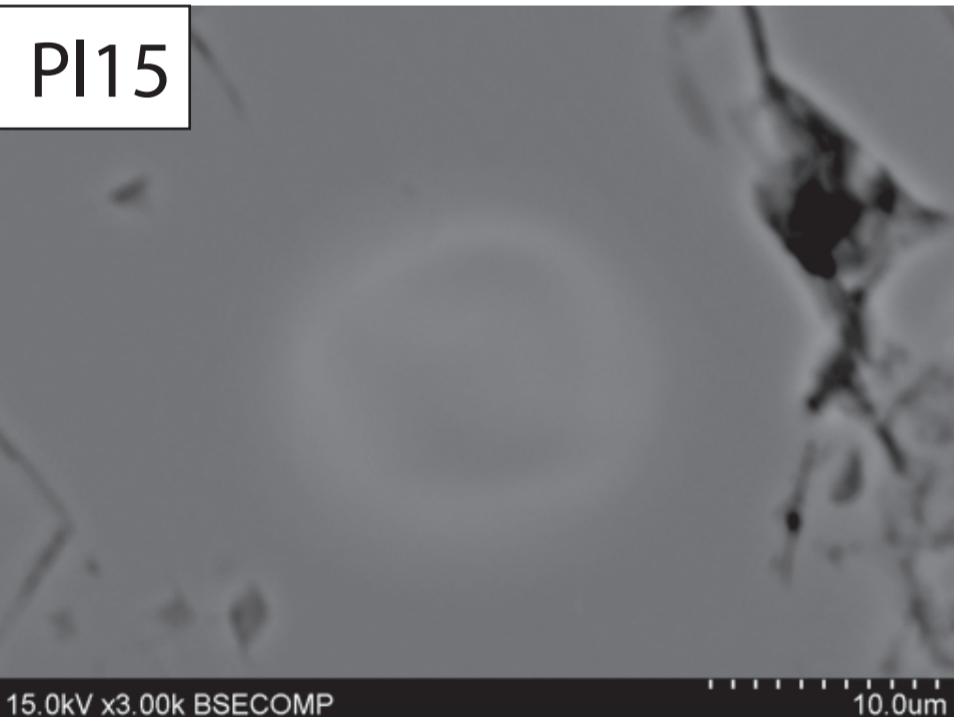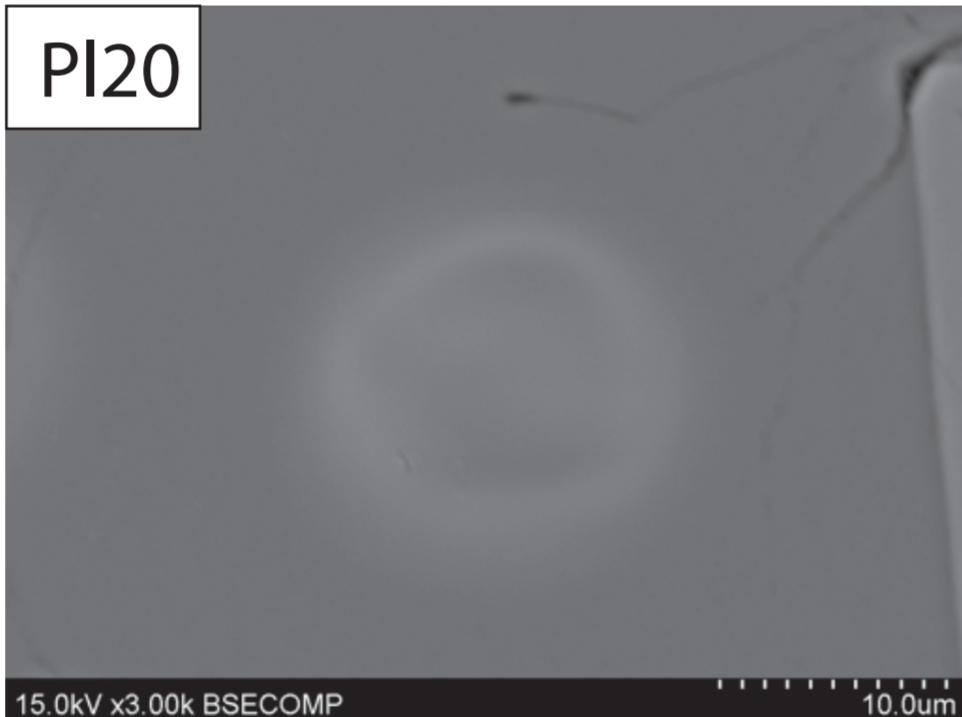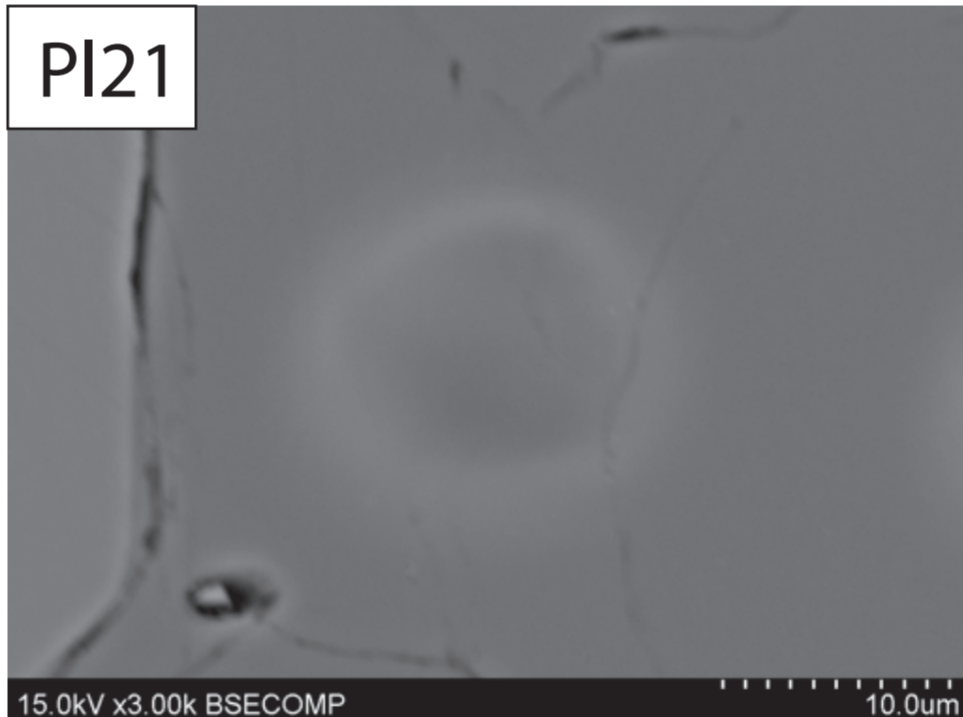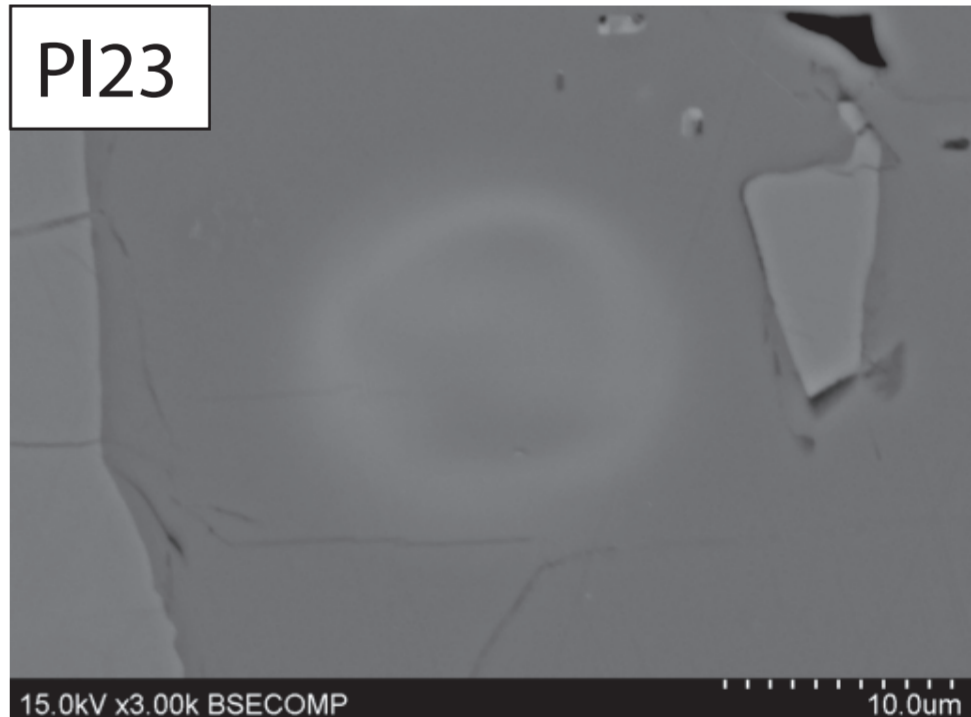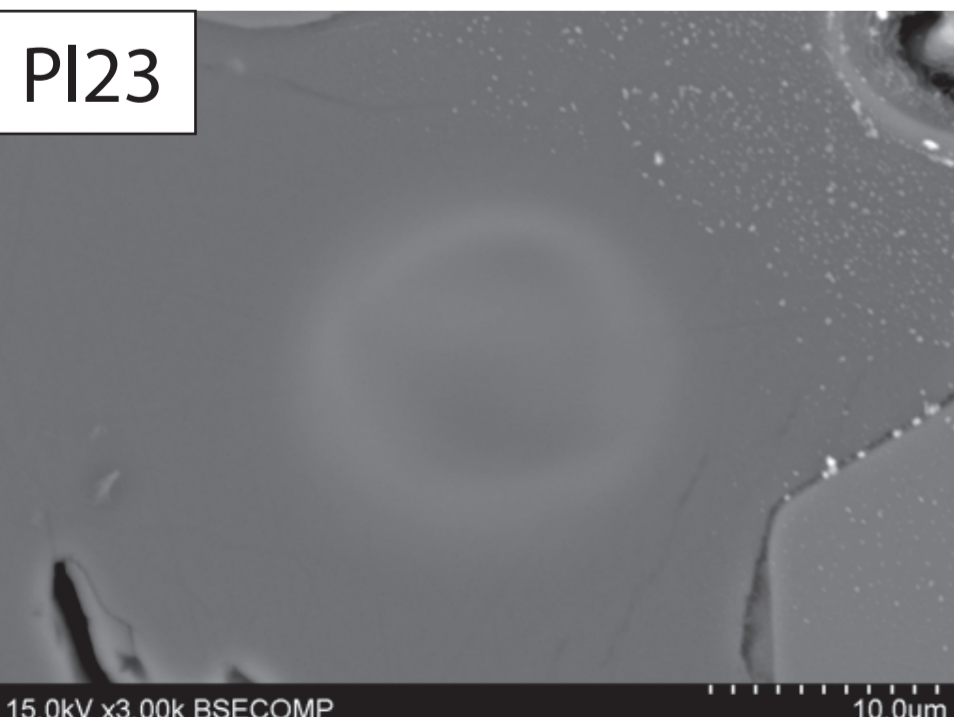

Supplement: NIHMS1757327-supplement-EA6-14.pdf [file NIHMS1757327-supplement-EA6-14.pdf]
