# Supplementary material
Source: PubMed Central journal article supplement (PMC8740609)

Correction scheme for  $\Delta^{26}\text{Mg}$  (‰) of Olivine and Pyroxene standards

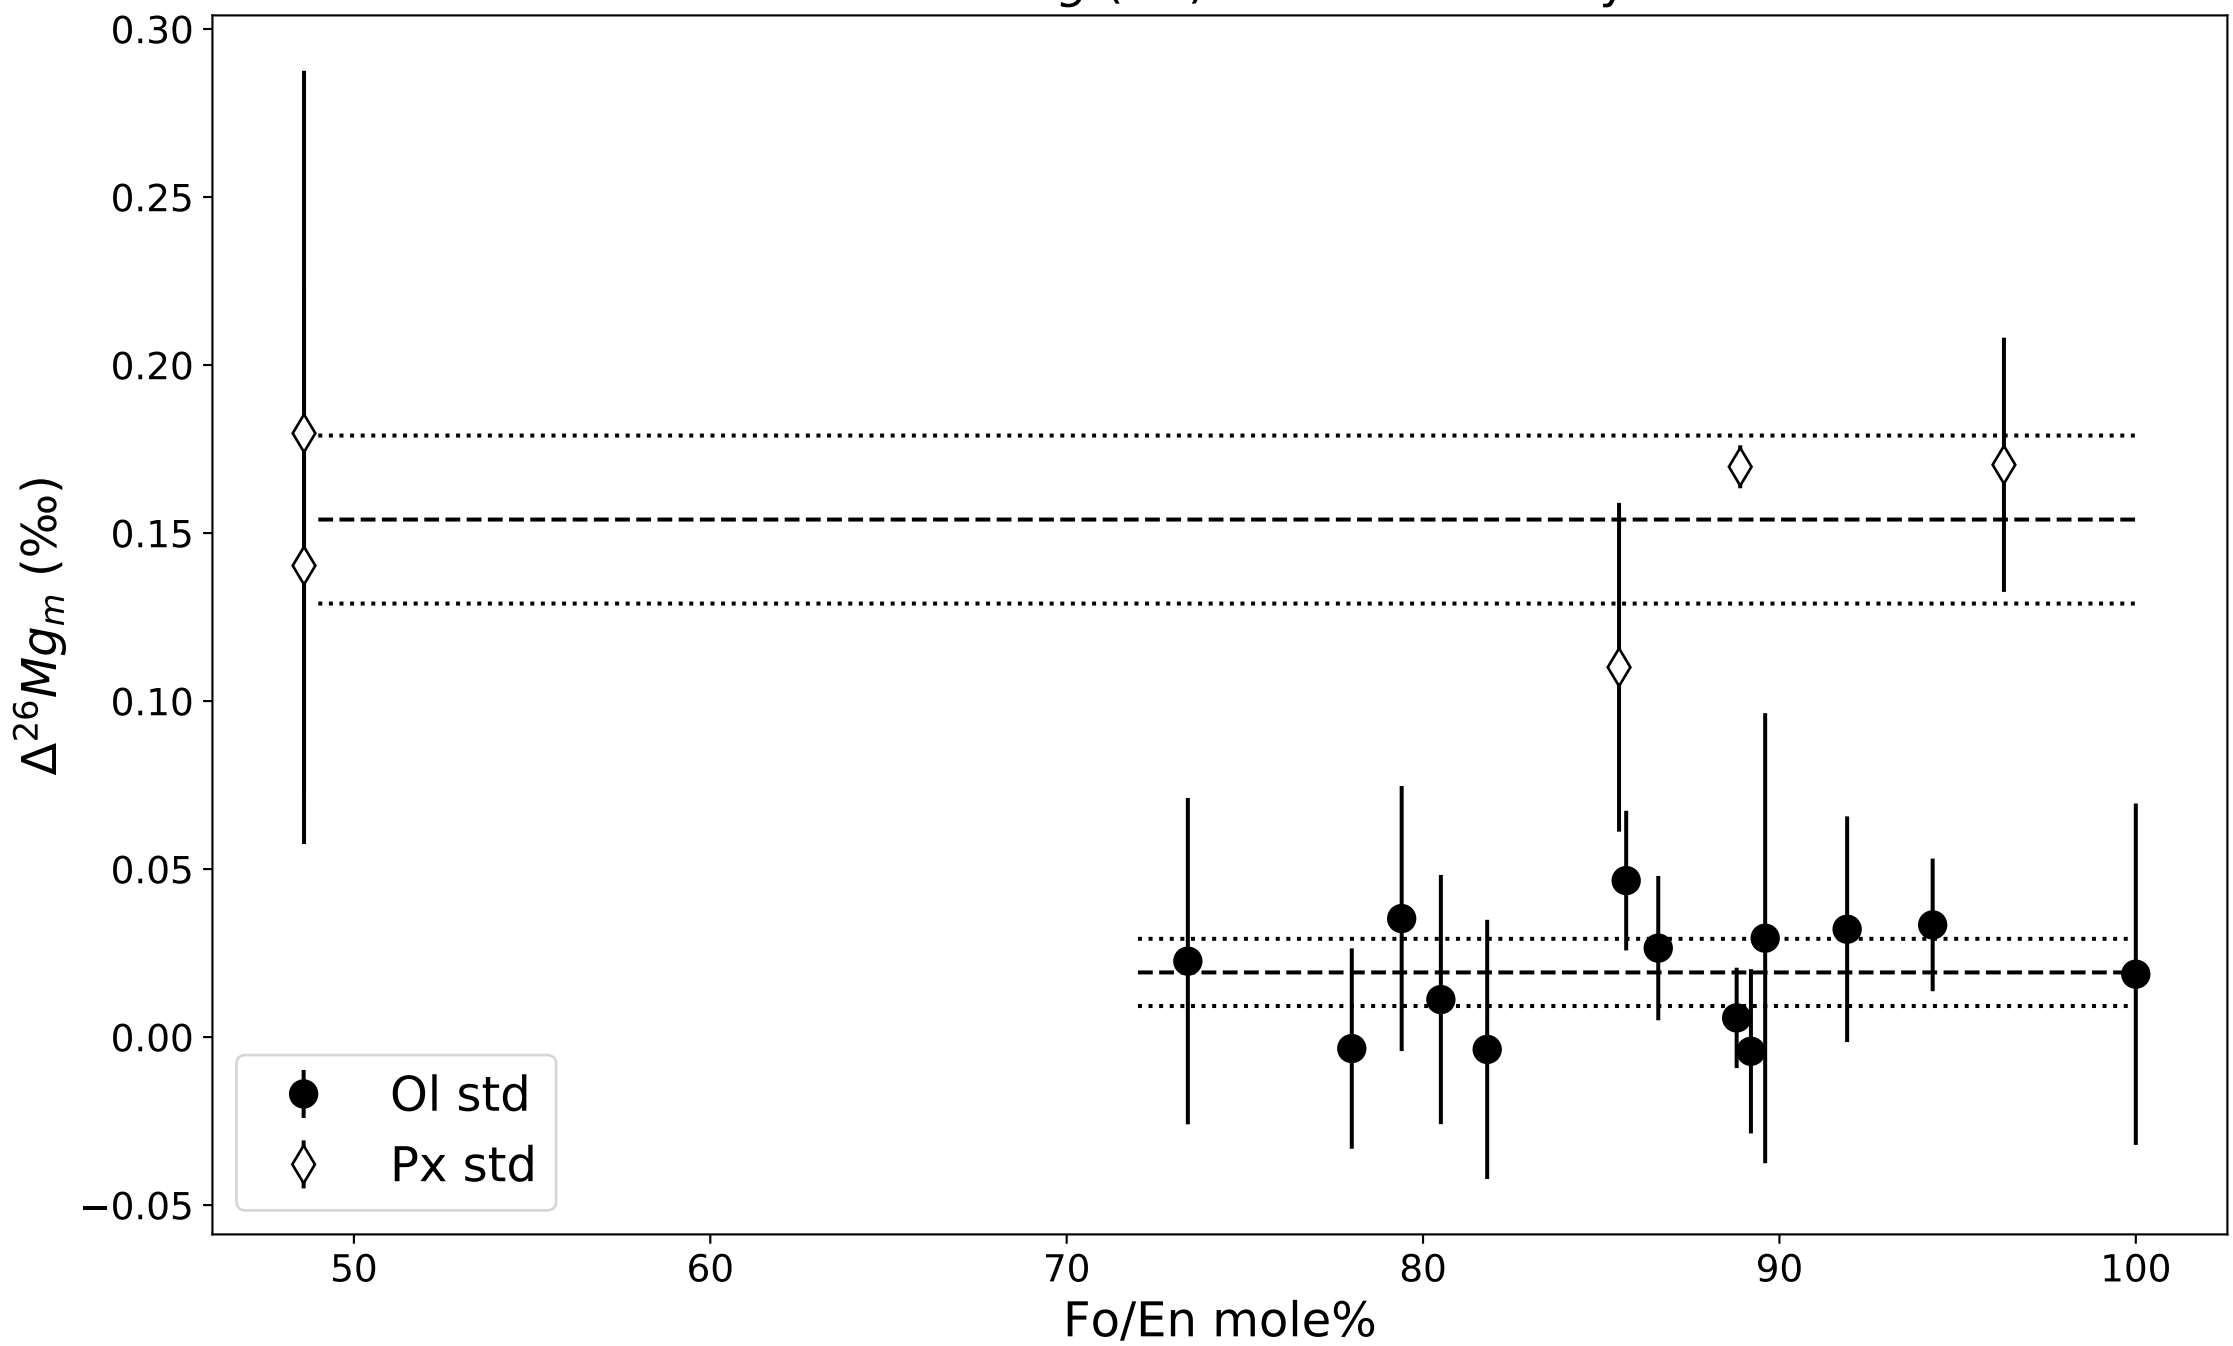

Determination of the exponential factor  $\beta$  using terrestrial Olivine standards

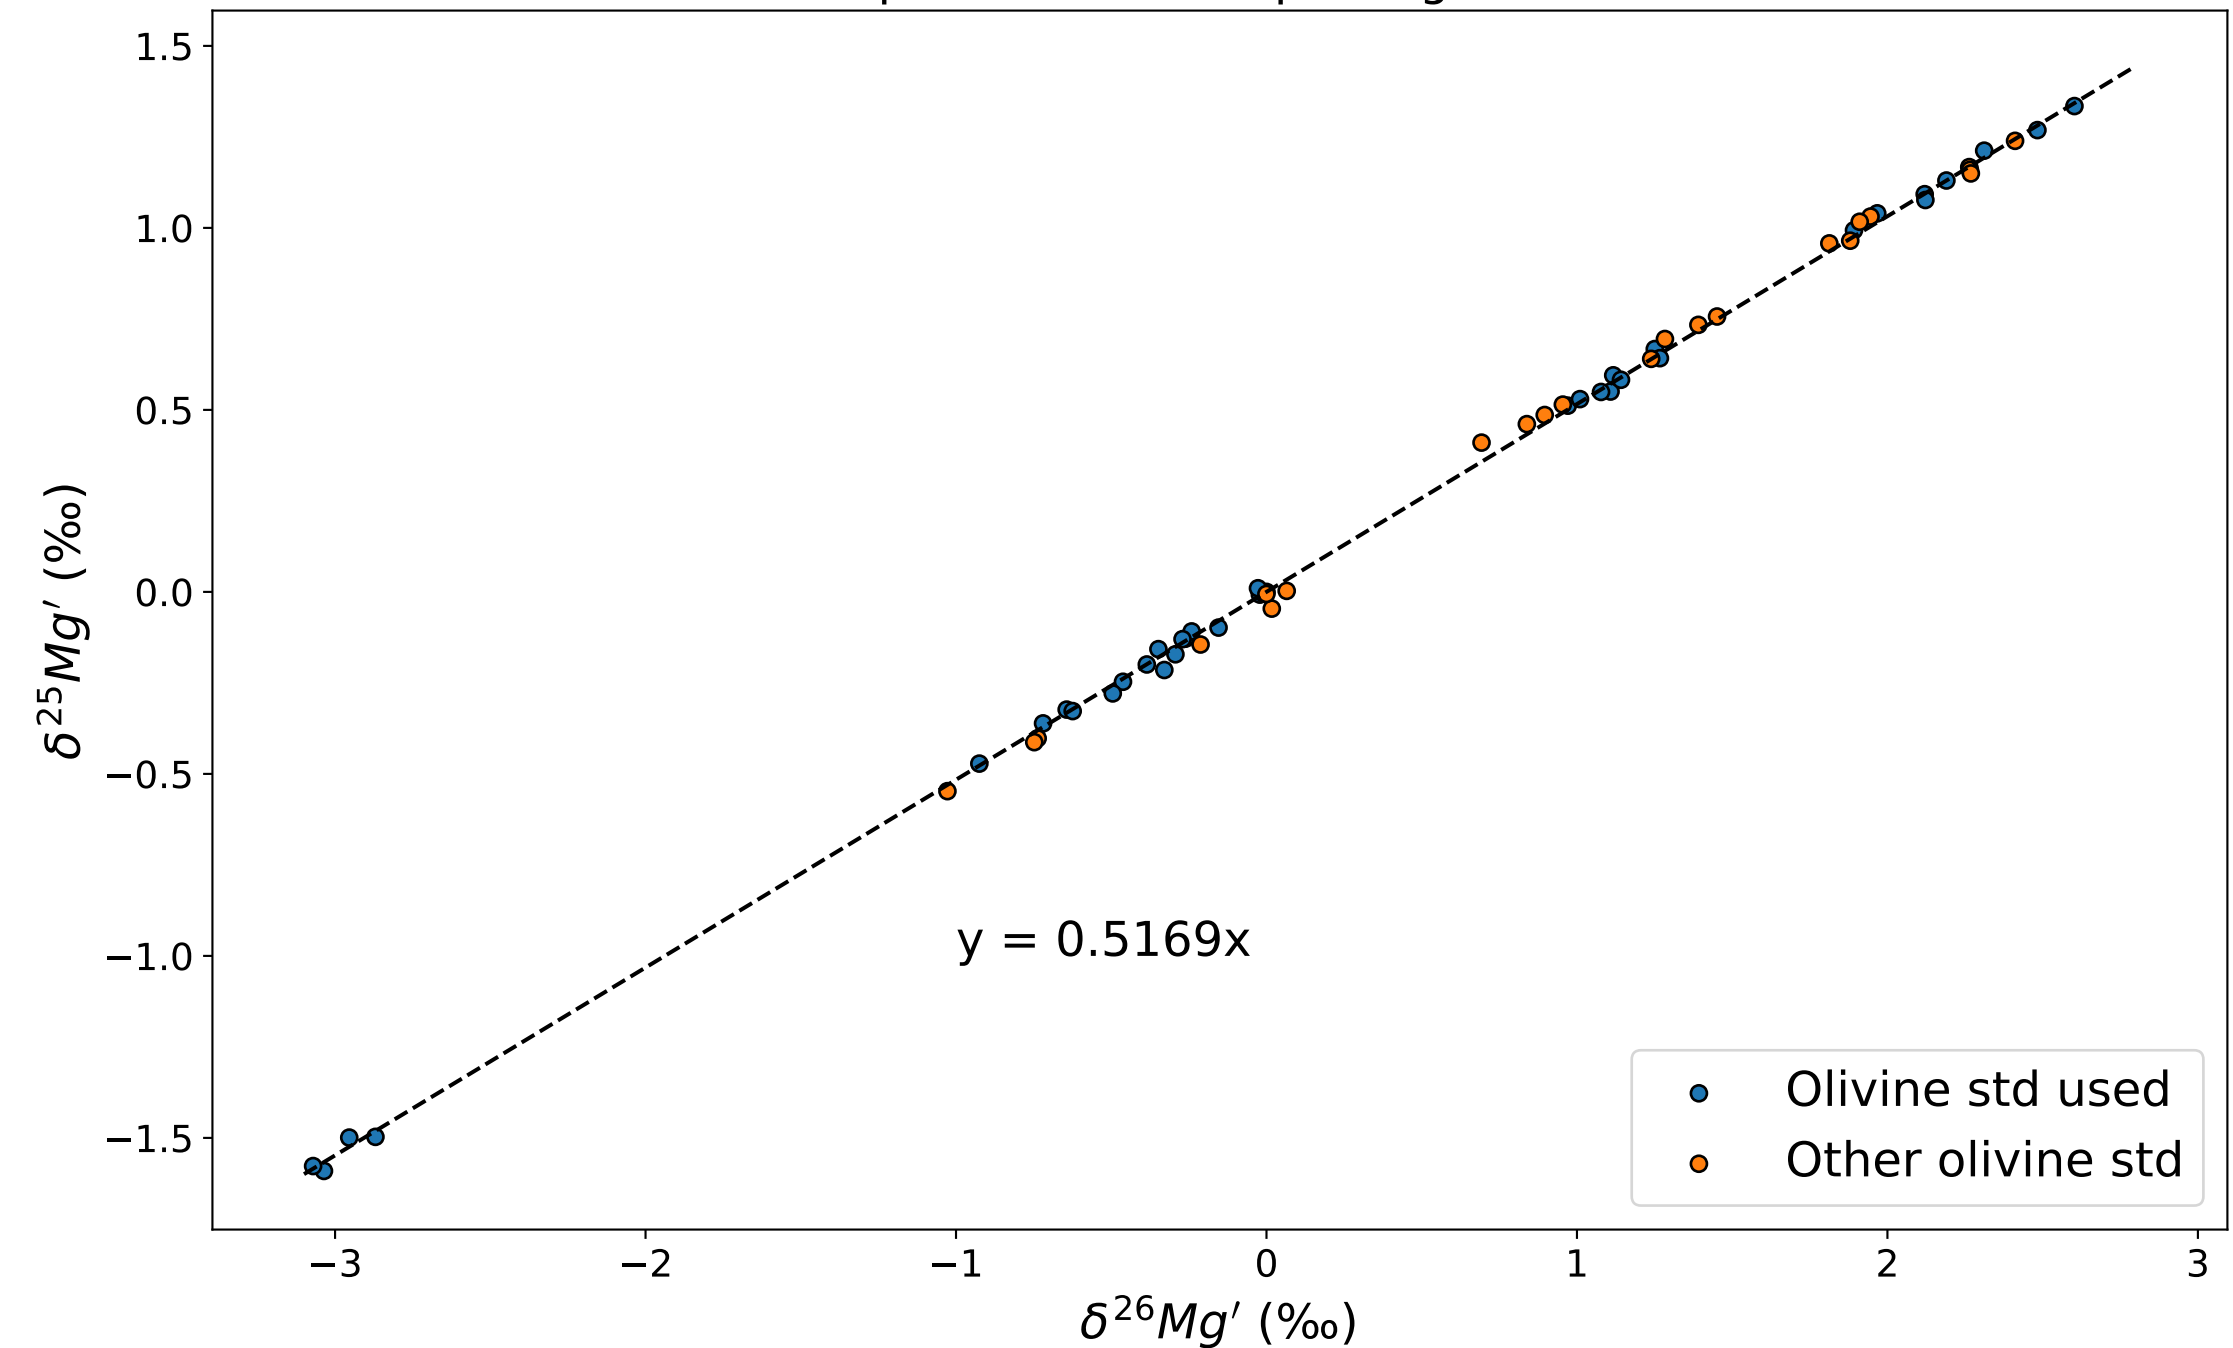

Supplement: NIHMS1757327-supplement-EA4.pdf [file NIHMS1757327-supplement-EA4.pdf]
